# Supplementary material for: Pd-catalysed decarboxylative Suzuki reactions and orthogonal Cu-based O-arylation of aromatic carboxylic acids
Source: Royal Society of Chemistry journal article supplement (doi:10.1039/c0cc04104a), 2010-11-24

# Pd-Catalysed Decarboxylative Suzuki Reactions and Orthogonal Cu-based *O*-Arylation of Aromatic Carboxylic Acids

*Jian-Jun Dai, Jing-Hui Liu, Dong-Fen Luo and Lei Liu\**

*Department of Chemistry, Tsinghua University, Beijing 100084, China*

*Email: [lliu@mail.tsinghua.edu.cn](mailto:lliu@mail.tsinghua.edu.cn)*

## Supporting Information

### *Table of Contents*

|                                                                                             |               |
|---------------------------------------------------------------------------------------------|---------------|
| <b>1. General Information.....</b>                                                          | <b>S2</b>     |
| a. Materials                                                                                |               |
| b. Methods                                                                                  |               |
| <b>2. Experimental Section.....</b>                                                         | <b>S2-7</b>   |
| a. Synthesis of the arylboron reagents                                                      |               |
| b. Preparation of the catalysts                                                             |               |
| c. Optimization of the reaction conditions                                                  |               |
| d. General procedures for the Pd-catalysed decarboxylative Suzuki cross-coupling            |               |
| e. General procedures for the Cu-catalysed <i>O</i> -arylation of aromatic carboxylic acids |               |
| <b>3. Characterization of the Products.....</b>                                             | <b>S8-23</b>  |
| NMR spectra data of compounds                                                               |               |
| <b>4. Copies of <sup>1</sup>H-NMR and <sup>13</sup>C-NMR Spectra.....</b>                   | <b>S24-94</b> |

## 1. General Information.....

### a. Materials

All reactions were carried out in oven-dried vials. The solvents, i.e. DMSO, NMP, DMF, DMAc, diglyme, were bought from Sigma-Aldrich (Sealed under argon) without further purification. All benzoic acids were purchased from Alfa Aesar, TCI or Sigma-Aldrich. All aryl boronic acids were purchased from Alfa Aesar, J&K or Sigma-Aldrich and used directly. All Ag and Cu salts were bought from Sigma-Aldrich, Strem, or Alfa Aesar. All the other reagents and solvents were bought from Sinopharm Chemical Reagent Co. Ltd or Alfa Aesar and were purified when necessary.

### b. Methods

<sup>1</sup>H-NMR, <sup>13</sup>C-NMR, <sup>19</sup>F-NMR spectra were recorded on a Bruker Avance 400 spectrometer at ambient temperature in CDCl<sub>3</sub> unless otherwise noted. Data for <sup>1</sup>H-NMR are reported as follows: chemical shift (δ ppm), multiplicity, integration, and coupling constant (Hz). Data for <sup>13</sup>C-NMR are reported in terms of chemical shift (δ ppm). Data for <sup>19</sup>F-NMR are reported as follows: chemical shift (δ ppm), multiplicity, integration, and coupling constant (Hz). Gas chromatographic (GC) analysis was acquired on a Shimadzu GC-2014 Series GC System equipped with a flame-ionization detector. GC-MS analysis was performed on Thermo Scientific AS 3000 Series GC-MS System. High-resolution mass spectra (HRMS) were recorded on a BRUKER VPEXII spectrometer with EI mode. Elementary analysis was carried out on Elementar Vario EL III elemental analyzer. Organic solutions were concentrated under reduced pressure on a Buchi rotary evaporator. Flash column chromatographic purification of products was accomplished using forced-flow chromatography on Silica Gel (200-300 mesh).

## 2. Experimental Section.....

### a. Synthesis of the arylboron reagents.

Table S1

|                                                                                    |                                                                                                                                 |
|------------------------------------------------------------------------------------|---------------------------------------------------------------------------------------------------------------------------------|
|   | Sylvain Darses; Guillaume Michaud; Jean-Pierre Gene <sup>^</sup> t<br><i>Eur. J. Org. Chem.</i> , <b>1999</b> , 1875.           |
|   | Franklin A. Davis; Ignatius J. Turchi; Bruce E. Maryanoff;<br>Robert O. Hutchins <i>J. Org. Chem.</i> , <b>1972</b> , 37, 1583. |
|   | H. G. Kuivila; A. H. Keough, E. J. Soboczinski <i>J. Org. Chem.</i> , <b>1954</b> , 19, 780.                                    |
|   | Eric P. Gillis; Martin D. Burke <i>J. Am. Chem. Soc.</i> , <b>2007</b> ,<br>129, 6716.                                          |
|  | Robert L. Letsinger; Ivan Skoog <i>J. Am. Chem. Soc.</i> , <b>1955</b> ,<br>77, 2491.                                           |

### b. Preparation of the catalyst:

#### Preparation of palladium (II) trifluoroacetate:

A 50 ml oven-dried flask was charged with Pd(OAc)<sub>2</sub> (1.0 g, 4.46 mmol). 25 ml trifluoroacetic acid was added. The mixture was stirred and heated to reflux (at 90 °C) in an oil bath. A gray-brown solid was formed as the mixture was heated. The solid was isolated by filtration and washed with trifluoroacetic acid (*ca.* 10 ml). The residue was dried under vacuum at 40°C for 3 h offering a brownish powder.

**Reference:** Daniel P. Bancroft; F. Albert Cotton; Mark Verbruggen *Acta Cryst.* **1989**, C45, 1289.

#### Preparation of bis(acetonitrile) palladium (II) *p*-toluenesulfonate:

To a clear dark orange solution of Pd(OAc)<sub>2</sub> (0.33 g, 1.47 mmol) in acetonitrile (30 ml) a solution of *p*-toluenesulfonic acid (1.5 g, 7.9 mmol) in acetonitrile (40 ml) was added dropwise with stirring. The color gradually changed to pale yellow. Subsequently diethyl ether (50 ml) was added, and this resulted in precipitation of fine pale yellow microcrystals. The suspension was set aside over night and the supernatant liquid was decanted. The crystals were washed with diethyl ether, dried under a slight vacuum, and shown to be Pd(MeCN)<sub>2</sub>(OTs)<sub>2</sub>.

**Reference:** E. Drent; J. A. M. van Broekhoven; M. J. Doyle *J. Organomet. Chem.*, **1991**, 417, 235.

### Preparation of bis(acetonitrile)dichloropalladium(II):

A suspension of PdCl<sub>2</sub> (1.00 g, 5.65 mmol) was heated to reflux in CH<sub>3</sub>CN (50 ml) with vigorous stirring for 10 h under N<sub>2</sub>. Hot filtration of the resultant wine-red coloured solution through a ceolite pad into stirred petroleum spirit (40–60 °C) at room temperature afforded a yellow-orange solid. Recrystallisation from CH<sub>3</sub>CN (100 ml), DCM (150 ml) and hexane (50 ml) gave (CH<sub>3</sub>CN)<sub>2</sub>PdCl<sub>2</sub> as a bright yellow powdery solid.

**Reference:** Mathews, Christopher J.; Smith, Paul J.; Welton, Tom *J. Mol. Catal. A Chem.*, **2003**, *206*, 77.

### c. Optimization of the reaction conditions:

General Procedure:

A 10ml oven-dried vial was charged with Pd(TFA)<sub>2</sub> (0.04 mmol), Ag<sub>2</sub>CO<sub>3</sub> (0.6 mmol), 2,4,6-trimethoxybenzoic acid (0.2 mmol), benzeneboronic acid (0.4 mmol). DMSO (1.0 ml) was added by syringe at room temperature. The vial was then sealed and the mixture was allowed to stir at the appointed temperature (120 ± 5 °C) for 2 h. Upon completion of the reaction, the mixture was cooled to room temperature and diluted with ethyl acetate, and analyzed by gas chromatography.

STable2

Decarboxylative Suzuki coupling between 2,4,6-trimethoxybenzoic acid and organoboron reagents<sup>[a]</sup>.

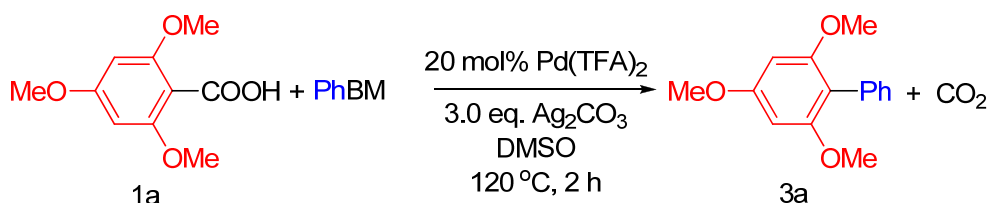

Table S2

| PhBM                    | PhB(OH) <sub>2</sub> | PhBF <sub>3</sub> K | Ph-B | Ph-B | Ph-B | Ph-B |
|-------------------------|----------------------|---------------------|------|------|------|------|
|                         |                      |                     |      |      |      |      |
| Yield[%] <sup>[b]</sup> | 96                   | 95                  | 86   | 60   | 6    | 10   |

[a] Condition for this transformation: 0.2 mmol of, 0.4 mmol of benzeneboronic acid, 20% mol of catalyst, 3.0 equiv. Ag<sub>2</sub>CO<sub>3</sub>, 1ml DMSO, 120°C, 2 h. GC yields were determined with the use of benzophenone as an internal standard. [b] Yields were based on 2,4,5-trimethoxybenzoic acid.

**S**Table 3

Various conditions towards the decarboxylative cross-coupling between 2,4,6-trimethoxybenzoic acid and benzenboronic acid<sup>[a]</sup>

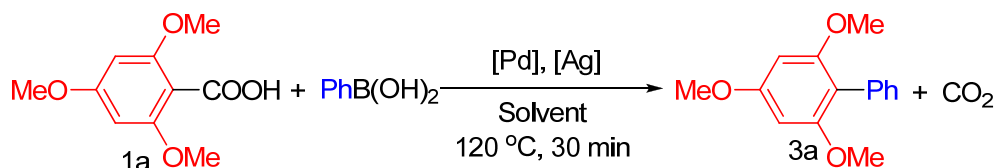

**Table S3**

| Entry             | Pd Source                                                           | Ag Source                           | Solvent      | Yield [%] <sup>[b]</sup> |
|-------------------|---------------------------------------------------------------------|-------------------------------------|--------------|--------------------------|
| 1                 | Pd(TFA) <sub>2</sub>                                                | Ag <sub>2</sub> CO <sub>3</sub>     | DMF          | 10                       |
| 2                 | Pd(TFA) <sub>2</sub>                                                | Ag <sub>2</sub> CO <sub>3</sub>     | NMP          | trace                    |
| 3                 | Pd(TFA) <sub>2</sub>                                                | Ag <sub>2</sub> CO <sub>3</sub>     | DMSO:DMF=1:9 | 69                       |
| 4                 | Pd(TFA) <sub>2</sub>                                                | Ag <sub>2</sub> CO <sub>3</sub>     | DMSO:NMP=1:9 | 80                       |
| 5                 | Pd(OAc) <sub>2</sub>                                                | Ag <sub>2</sub> CO <sub>3</sub>     | DMSO         | 51                       |
| 6                 | PdCl <sub>2</sub>                                                   | Ag <sub>2</sub> CO <sub>3</sub>     | DMSO         | 53                       |
| 7                 | Pd(CH <sub>3</sub> CN) <sub>2</sub> Cl <sub>2</sub>                 | Ag <sub>2</sub> CO <sub>3</sub>     | DMSO         | 54                       |
| <b>8</b>          | <b>Pd(TFA)<sub>2</sub></b>                                          | <b>Ag<sub>2</sub>CO<sub>3</sub></b> | <b>DMSO</b>  | <b>96</b>                |
| 9 <sup>[c]</sup>  | Pd(TFA) <sub>2</sub>                                                | Ag <sub>2</sub> CO <sub>3</sub>     | DMSO         | 95                       |
| 10 <sup>[d]</sup> | Pd(TFA) <sub>2</sub>                                                | Ag <sub>2</sub> CO <sub>3</sub>     | DMSO         | 61                       |
| 11 <sup>[e]</sup> | Pd(TFA) <sub>2</sub>                                                | Ag <sub>2</sub> CO <sub>3</sub>     | DMSO         | 35                       |
| 12                | /                                                                   | Ag <sub>2</sub> CO <sub>3</sub>     | DMSO         | 0                        |
| 13                | Pd(TFA) <sub>2</sub>                                                | /                                   | DMSO         | trace                    |
| 14                | Pd(CH <sub>3</sub> CN) <sub>4</sub> (BF <sub>4</sub> ) <sub>2</sub> | Ag <sub>2</sub> CO <sub>3</sub>     | DMSO         | 74                       |
| 15                | Pd(CH <sub>3</sub> CN) <sub>2</sub> (OTs) <sub>2</sub>              | Ag <sub>2</sub> CO <sub>3</sub>     | DMSO         | 61                       |
| 16                | Pd(TFA) <sub>2</sub>                                                | Ag <sub>3</sub> PO <sub>4</sub>     | DMSO         | 36                       |
| 17                | Pd(TFA) <sub>2</sub>                                                | Ag <sub>2</sub> O                   | DMSO         | 79                       |
| 18                | Pd(TFA) <sub>2</sub>                                                | AgOAc                               | DMSO         | 22                       |
| 19                | Pd(TFA) <sub>2</sub>                                                | AgTFA                               | DMSO         | 7                        |
| 20                | Pd(TFA) <sub>2</sub>                                                | AgF <sub>2</sub>                    | DMSO         | 53                       |
| 21                | Pd(TFA) <sub>2</sub>                                                | AgOTs                               | DMSO         | 5                        |
| 22                | Pd(TFA) <sub>2</sub>                                                | AgOMs                               | DMSO         | 4                        |
| 23                | Pd(TFA) <sub>2</sub>                                                | Ag <sub>2</sub> SO <sub>4</sub>     | DMSO         | 6                        |
| 24                | Pd(TFA) <sub>2</sub>                                                | AgBF <sub>4</sub>                   | DMSO         | 26                       |
| 25                | Pd(TFA) <sub>2</sub>                                                | AgNO <sub>3</sub>                   | DMSO         | 16                       |

[a]Condition for this transformation: 0.2 mmol of 2,4,6-trimethoxybenzoic acid, 0.4 mmol of benzenboronic acid, 20% mol of catalyst, 3.0 equiv. [Ag], 1ml of solvent, 120°C, 30 min. GC yields were determined with the use of benzophenone as an internal standard. [b]Yields were based on 2,4,5-trimethoxybenzoic acid. [c] 10min. [d] 10 mol% Pd(TFA)<sub>2</sub>. [e] 5 mol% Pd(TFA)<sub>2</sub>.

#### d. General Procedure for Pd-catalysed decarboxylative Suzuki cross-coupling:

General procedure :

Palladium(II) trifluoroacetate (0.04 mmol), Ag<sub>2</sub>CO<sub>3</sub> (0.6 mmol), benzoic acid (0.2 mmol) and the aryl boronic reagent (0.4 mmol) were placed in an oven-dried 10 ml vial. Then DMSO (1 ml) was added with a syringe. The vial was sealed and stirred at 120±5°C for the appointed time. Upon completion of the reaction, the mixture was cooled to room temperature and diluted with diethyl ether (30 ml). It was then filtered through a short silica column to remove the deposition. The organic layers were washed with water (50 ml×2), and then with brine, dried over MgSO<sub>4</sub>, and filtered. The solvents were removed. Purification of the residue by column chromatography (silica gel, ethyl acetate/petroleum ether) yielded the desired product.

#### STable 4

Various conditions towards the Cu-catalysed cross-coupling between 2,4,6-trimethoxybenzoic acid and benzeneboronic acid<sup>[a]</sup>

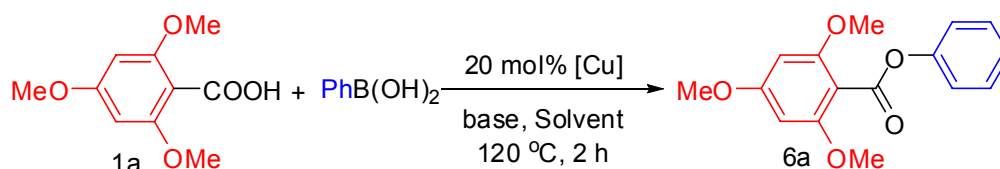

**Table S4**

| Entry             | Cu Source                  | Base                                | Solvent     | Yield [%] <sup>[b]</sup> |
|-------------------|----------------------------|-------------------------------------|-------------|--------------------------|
| 1 <sup>[c]</sup>  | CuF <sub>2</sub>           | Ag <sub>2</sub> CO <sub>3</sub>     | DMSO        | 87                       |
| 2                 | CuF <sub>2</sub>           | Ag <sub>2</sub> CO <sub>3</sub>     | DMSO        | 35                       |
| 3                 | Cu(OAc) <sub>2</sub>       | Ag <sub>2</sub> CO <sub>3</sub>     | DMSO        | 78                       |
| 4                 | CuCl <sub>2</sub>          | Ag <sub>2</sub> CO <sub>3</sub>     | DMSO        | 82                       |
| 5                 | CuI                        | Ag <sub>2</sub> CO <sub>3</sub>     | DMSO        | 85                       |
| <b>6</b>          | <b>Cu(OTf)<sub>2</sub></b> | <b>Ag<sub>2</sub>CO<sub>3</sub></b> | <b>DMSO</b> | <b>93</b>                |
| 7                 | /                          | Ag <sub>2</sub> CO <sub>3</sub>     | DMSO        | 0                        |
| 8                 | Cu(OTf) <sub>2</sub>       | /                                   | DMSO        | trace                    |
| 9                 | Cu(OTf) <sub>2</sub>       | AgOAc                               | DMSO        | 16                       |
| 10                | Cu(OTf) <sub>2</sub>       | AgOTs                               | DMSO        | trace                    |
| 11                | Cu(OTf) <sub>2</sub>       | Ag <sub>2</sub> O                   | DMSO        | 77                       |
| 12                | Cu(OTf) <sub>2</sub>       | Ag <sub>2</sub> CO <sub>3</sub>     | DMF         | 74                       |
| 13                | Cu(OTf) <sub>2</sub>       | Ag <sub>2</sub> CO <sub>3</sub>     | NMP         | 61                       |
| 14                | Cu(OTf) <sub>2</sub>       | Ag <sub>2</sub> CO <sub>3</sub>     | Toluene     | 10                       |
| 15                | Cu(OTf) <sub>2</sub>       | Ag <sub>2</sub> CO <sub>3</sub>     | Diglyme     | 0                        |
| 16                | Cu(OTf) <sub>2</sub>       | Ag <sub>2</sub> CO <sub>3</sub>     | DMAc        | 75                       |
| 17 <sup>[d]</sup> | Cu(OTf) <sub>2</sub>       | K <sub>2</sub> CO <sub>3</sub>      | DMSO        | trace                    |
| 18 <sup>[d]</sup> | Cu(OTf) <sub>2</sub>       | Na <sub>2</sub> CO <sub>3</sub>     | DMSO        | trace                    |
| 19 <sup>[d]</sup> | Cu(OTf) <sub>2</sub>       | Prydine                             | DMSO        | 36                       |

[a] Condition for this transformation: 0.2 mmol of 2,4,6-trimethoxybenzoic acid, 0.4 mmol of benzenboronic acid, 20% mol of catalyst, 2.0 equiv. base, 1ml of solvent, 120°C, 2 h. GC yields were determined with the use of benzophenone as an internal standard. [b] Yields were based on 2,4,5-trimethoxybenzoic acid. [c] 1.0 eq. CuF<sub>2</sub>. [d] 200 mg 4Å MS, 1 atm O<sub>2</sub> as the oxidant.

---

**e. General procedure for the Cu-catalysed *O*-arylation of aromatic carboxylic acids**

General procedure :

Copper(II) trifluoromethanesulfonate (0.04 mmol), Ag<sub>2</sub>CO<sub>3</sub> (0.4 mmol), benzoic acid (0.2 mmol) and the aryl boronic acid (0.4 mmol) were placed in an oven-dried 10 ml vial. Then DMSO (1 ml) was added with a syringe. The vial was sealed and stirred at 120±5°C for the appointed time. Upon completion of the reaction, the mixture was cooled to room temperature and diluted with diethyl ether (30 ml). It was then filtered through a short silica column to remove the deposition. The organic layers were washed with water (50 ml×2), and then with brine, dried over MgSO<sub>4</sub>, and filtered. The solvents were removed. Purification of the residue by column chromatography (silica gel, ethyl acetate/petroleum ether) yielded the desired product.

### 3. Characterization of the Products.....

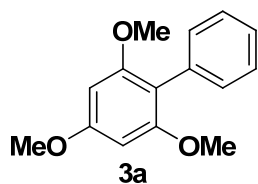

**2,4,6-trimethoxybiphenyl (3a).** Spectral data corresponds to that previously reported. Colorless solid (45 mg, 92% yield).  $^1\text{H-NMR}$  (400 MHz,  $\text{CDCl}_3$ )  $\delta$  3.71 (s, 6H), 3.86 (s, 3H), 6.23 (s, 2H), 7.33 (m, 5H).  $^{13}\text{C-NMR}$  (100 MHz,  $\text{CDCl}_3$ )  $\delta$  55.39, 55.90, 90.99, 112.62, 126.49, 127.63, 131.22, 134.14, 158.39, 160.53.

**Reference:** Ikuya Ban; Tomoko Sudo; Tadashi Taniguchi; Kenichiro Itami *Org. Lett.* **2008**, *10*, 3607.

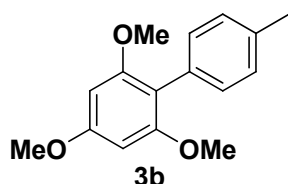

**2,4,6-trimethoxy-4'-methylbiphenyl (3b).** Spectral data corresponds to that previously reported. Colorless solid (45 mg, 87% yield).  $^1\text{H-NMR}$  (400 MHz,  $\text{CDCl}_3$ )  $\delta$  2.36 (s, 3H), 3.69 (s, 6H), 3.84 (s, 3H), 6.22 (s, 2H), 7.17-7.23 (m, 4H).  $^{13}\text{C-NMR}$  (100 MHz,  $\text{CDCl}_3$ )  $\delta$  21.39, 55.41, 55.92, 91.00, 112.54, 128.54, 128.91, 131.07, 136.04, 158.49, 160.45.

**Reference:** Ikuya Ban; Tomoko Sudo; Tadashi Taniguchi; Kenichiro Itami *Org. Lett.* **2008**, *10*, 3607.

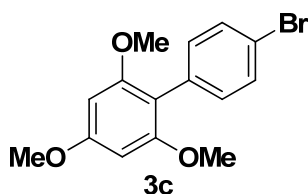

**4'-bromo-2,4,6-trimethoxybiphenyl (3c).** Spectral data corresponds to that previously reported. Colorless solid (61 mg, 95% yield).  $^1\text{H-NMR}$  (400 MHz,  $\text{CDCl}_3$ )  $\delta$  3.72 (s, 6H), 3.86 (s, 3H), 6.22 (s, 2H), 7.20 (d, 2H,  $J=8.0$  Hz), 7.48 (d, 2H,  $J=8.0$  Hz).  $^{13}\text{C-NMR}$  (100 MHz,  $\text{CDCl}_3$ ):  $\delta$  55.40, 55.85, 90.94, 111.21, 120.50, 130.79, 133.00, 133.06, 158.22, 160.82.

**Reference:** Ikuya Ban; Tomoko Sudo; Tadashi Taniguchi; Kenichiro Itami *Org. Lett.* **2008**, *10*, 3607.

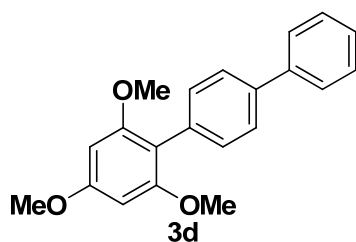

**4'-phenyl-2,4,6-trimethoxybiphenyl (3d).** Colorless solid (64 mg, 94% yield).  $^1\text{H-NMR}$  (400 MHz,  $\text{CDCl}_3$ )  $\delta$  3.74 (s, 6H), 3.87 (s, 3H), 6.25 (s, 2H), 7.32 (m, 1H), 7.43 (m, 4H), 7.62 (m, 4H).  $^{13}\text{C-NMR}$  (100 MHz,  $\text{CDCl}_3$ ):  $\delta$  55.42, 55.95, 91.02, 112.07, 126.45, 126.98, 127.18, 128.67, 131.64,



133.17, 139.18, 141.39, 158.46, 160.63. HRMS (EI) calcd for C<sub>21</sub>H<sub>20</sub>O<sub>3</sub>: 320.1412; found: 320.1407.

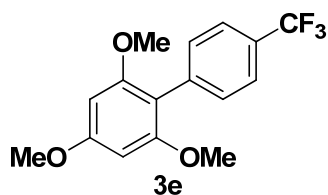

**2,4,6-trimethoxy-4'-(trifluoromethyl)biphenyl (3e).** Colorless solid (56 mg, 89% yield). <sup>1</sup>H-NMR (400 MHz, CDCl<sub>3</sub>) δ 3.71 (s, 6H), 3.85 (s, 3H), 6.23 (s, 2H), 7.44 (d, 2H, *J*=8.0 Hz), 7.60 (d, 2H, *J*=8.0 Hz). <sup>13</sup>C-NMR(100 MHz, CDCl<sub>3</sub>) δ 55.40, 55.83, 90.96, 111.05, 124.47(q, *J*=3.5 Hz), 124.57(q, *J*=271 Hz, CF<sub>3</sub>), 128.32(q, *J*=32.1 Hz), 131.67, 138.20(d, *J*=1.4 Hz), 158.30, 161.17. <sup>19</sup>F-NMR(377 MHz, CDCl<sub>3</sub>): δ -62.29 (s). HRMS (EI) m/z calcd for C<sub>16</sub>H<sub>15</sub>F<sub>3</sub>O<sub>3</sub>: 312.0973; found: 312.0914.

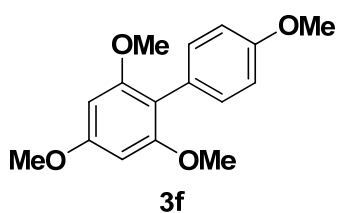

**2,4,4',6-tetramethoxybiphenyl (3f).** Spectral data corresponds to that previously reported. Colorless solid (40 mg, 72% yield). <sup>1</sup>H-NMR (400 MHz, CDCl<sub>3</sub>) δ 3.72 (s, 6H), 3.83 (s, 3H), 3.86 (s, 3H), 6.22 (s, 2H), 6.93 (d, 2H, *J*=8.8Hz), 7.26 (d, 2H, *J*=8.8Hz). <sup>13</sup>C-NMR(100 MHz, CDCl<sub>3</sub>) δ 55.13, 55.39, 55.91, 90.89, 112.05, 113.25, 126.14, 132.20, 158.12, 158.43, 160.28.

**Reference:** Jean-Michel Becht; Cedric Catala; Claude Le Drian; Alain Wagner *Org. Lett.* **2007**, *9*, 1781.

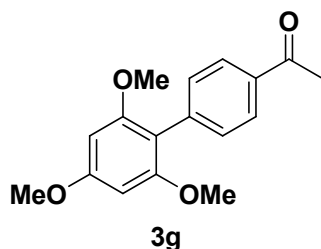

**1-(2,4,6-trimethoxybiphenyl-4-yl)ethanone (3g).** Colorless solid (48 mg, 84% yield). <sup>1</sup>H-NMR (400 MHz, CDCl<sub>3</sub>) δ 2.61 (s, 3H), 3.72 (s, 6H), 3.87 (s, 3H), 6.23 (s, 2H), 7.44 (m, 2H, *J*=8.4 Hz), 7.97 (m, 2H, *J*=8.4Hz). <sup>13</sup>C-NMR(100 MHz, CDCl<sub>3</sub>) δ 26.57, 55.42, 55.87, 90.95, 111.32, 127.69, 131.56, 135.14, 139.78, 158.27, 161.14, 197.98. HRMS (EI) m/z calcd for C<sub>17</sub>H<sub>18</sub>O<sub>4</sub>: 286.1205; found: 286.1198.

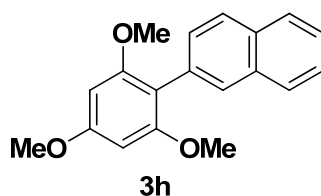

**2-(2,4,6-trimethoxyphenyl)naphthalene (3h).** Spectral data corresponds to that previously reported. Colorless solid (54 mg, 92% yield). <sup>1</sup>H-NMR (400 MHz, CDCl<sub>3</sub>) δ 3.78 (s, 6H), 3.94 (s, 3H), 6.34 (s, 2H), 7.53 (m, 3H), 7.90 (m, 4H). <sup>13</sup>C-NMR(100 MHz, CDCl<sub>3</sub>) δ 55.44, 55.96, 91.15, 112.57, 125.48, 125.53, 126.86, 127.68, 128.10, 128.90, 129.84, 129.99, 130.96, 131.80, 132.40, 133.43, 158.62,

160.74. HRMS (EI)  $m/z$  calcd for  $C_{17}H_{18}O_4$ : 294.1256; found: 294.1263.

**Reference:** Ikuya Ban; Tomoko Sudo; Tadashi Taniguchi; Kenichiro Itami *Org. Lett.* **2008**, *10*, 3607.

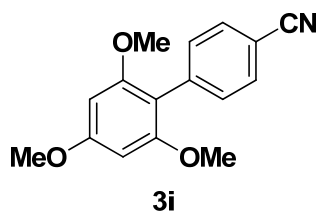

**2',4',6'-trimethoxybiphenyl-4-carbonitrile (3i).** Colorless solid (39 mg, 72% yield).  $^1H$ -NMR (400 MHz,  $CDCl_3$ )  $\delta$  3.72 (s, 6H), 3.86 (s, 3H), 6.22 (s, 2H), 7.44 (m, 2H,  $J=8.8$  Hz), 7.63 (m, 2H,  $J=8.8$  Hz).  $^{13}C$ -NMR(100 MHz,  $CDCl_3$ )  $\delta$  55.45, 55.82, 90.93, 109.82, 110.50, 119.49, 131.29, 132.20, 139.61, 158.15, 161.47. HRMS (EI)  $m/z$  calcd for  $C_{16}H_{15}NO_3$ : 269.1052; found: 269.1021.

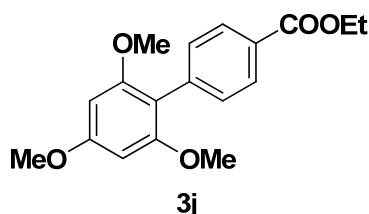

**Ethyl 2',4',6'-trimethoxybiphenyl-4-carboxylate (3j).** Colorless solid (51 mg, 81% yield).  $^1H$ -NMR (400 MHz,  $CDCl_3$ )  $\delta$  1.39 (t, 3H,  $J=7.2$  Hz), 3.72 (s, 6H), 3.86 (s, 3H), 4.38 (q, 2H,  $J=7.2$  Hz), 6.23 (s, 2H), 7.40 (d, 2H,  $J=8.4$  Hz), 8.05 (d, 2H,  $J=8.4$  Hz).  $^{13}C$ -NMR(100 MHz,  $CDCl_3$ )  $\delta$  14.40, 55.40, 55.85, 60.68, 90.96, 111.55, 128.40, 128.83, 131.31, 139.34, 158.28, 161.03, 166.80. HRMS (EI)  $m/z$  calcd for  $C_{18}H_{20}O_5$ : 316.1311; found: 316.1292.

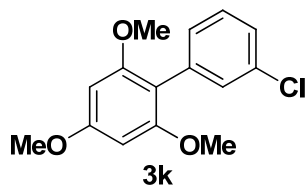

**3'-chloro-2,4,6-trimethoxybiphenyl (3k).** Spectral data corresponds to that previously reported. Colorless solid (47 mg, 85% yield).  $^1H$ -NMR (400 MHz,  $CDCl_3$ ):  $\delta$  3.72 (s, 6H), 3.86 (s, 3H), 6.21 (s, 2H), 7.26 (m, 4H).  $^{13}C$ -NMR(100 MHz,  $CDCl_3$ )  $\delta$  55.41, 55.87, 90.81, 111.04, 126.58, 128.78, 129.53, 131.35, 133.34, 136.0, 158.27, 160.92.

**Reference:** Ikuya Ban; Tomoko Sudo; Tadashi Taniguchi; Kenichiro Itami *Org. Lett.* **2008**, *10*, 3607.

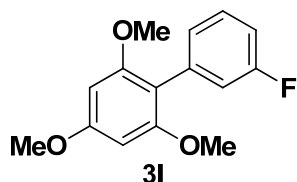

**3'-fluoro-2,4,6-trimethoxybiphenyl (3l).** Spectral data corresponds to that previously reported. Colorless solid (51 mg, 97% yield).  $^1H$ -NMR (400 MHz,  $CDCl_3$ )  $\delta$  3.73 (s, 6H), 3.86 (s, 3H), 6.22 (s, 2H), 6.97 (t, 1H,  $J=8.4$ Hz), 7.05 (d, 1H,  $J=10.0$ Hz), 7.10 (d, 1H,  $J=7.6$ Hz), 7.32 (m, 1H).  $^{13}C$ -NMR(100 MHz,  $CDCl_3$ )  $\delta$  55.41, 55.87, 90.82, 111.19, 113.33 (d,  $J=21$  Hz), 118.22 (d,  $J=21$

(Hz), 126.99 (d,  $J=2.5$  Hz), 128.81 (d,  $J=8.1$  Hz), 136.29 (d,  $J=8.6$  Hz), 158.26, 160.85, 162.40 (d,  $J=239.1$  Hz).  $^{19}\text{F}$ -NMR (377 MHz,  $\text{CDCl}_3$ ):  $\delta$  -115 (s, 1F).

**Reference:** Ikuya Ban; Tomoko Sudo; Tadashi Taniguchi; Kenichiro Itami *Org. Lett.* **2008**, *10*, 3607.

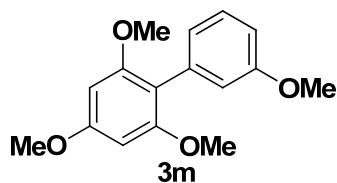

**2,3',4,6-tetramethoxybiphenyl (3m).** Spectral data corresponds to that previously reported. Colorless solid (40 mg, 73% yield).  $^1\text{H}$ -NMR (400 MHz,  $\text{CDCl}_3$ )  $\delta$  3.72 (s, 6H), 3.81 (s, 3H), 3.86 (s, 3H), 6.22 (s, 2H), 6.84 (ddd, 1H,  $J_1=8.4$  Hz,  $J_2=2.8$  Hz,  $J_3=0.8$  Hz), 6.88 (m, 1H), 6.91 (m, 1H), 7.30 (t, 1H,  $J=8.0$  Hz).  $^{13}\text{C}$ -NMR(100 MHz,  $\text{CDCl}_3$ )  $\delta$  55.14, 55.39, 55.92, 90.97, 112.1, 112.44, 117.01, 123.73, 128.47, 135.49, 158.40, 158.98, 160.58.

**Reference:** Ikuya Ban; Tomoko Sudo; Tadashi Taniguchi; Kenichiro Itami *Org. Lett.* **2008**, *10*, 3607.

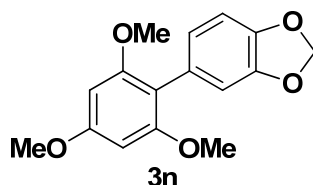

**5-(2,4,6-trimethoxyphenyl)benzo[d][1,3]dioxole (3n).** Colorless solid (40 mg, 70% yield).  $^1\text{H}$ -NMR (400 MHz,  $\text{CDCl}_3$ )  $\delta$  3.73 (s, 6H), 3.85 (s, 3H), 5.96 (s, 2H), 6.22 (s, 2H), 6.81(m, 3H).  $^{13}\text{C}$ -NMR(100 MHz,  $\text{CDCl}_3$ )  $\delta$  55.38, 55.92, 90.97, 100.80, 107.89, 111.81, 112.12, 124.44, 127.54, 146.11, 147.0, 158.47, 160.43. HRMS (EI)  $m/z$  calcd for  $\text{C}_{16}\text{H}_{16}\text{O}_5$ : 288.0998; found: 288.0918.

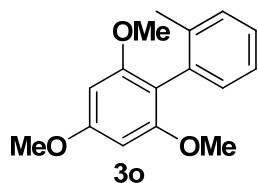

**2,4,6-trimethoxy-2'-methylbiphenyl (3o).** Colorless solid (17 mg, 32% yield).  $^1\text{H}$ -NMR (400 MHz,  $\text{CDCl}_3$ )  $\delta$  2.07 (s, 3H), 3.69 (s, 3H), 3.86 (s, 3H), 6.22 (s, 2H), 7.11 (m, 1H), 7.21 (m, 3H).  $^{13}\text{C}$ -NMR(100 MHz,  $\text{CDCl}_3$ )  $\delta$  19.77, 55.36, 55.83, 90.75, 111.87, 125.19, 127.08, 129.51, 131.29, 134.16, 137.81, 158.34, 160.64. HRMS (EI)  $m/z$  calcd for  $\text{C}_{16}\text{H}_{18}\text{O}_3$ : 258.1256; found: 258.1222.

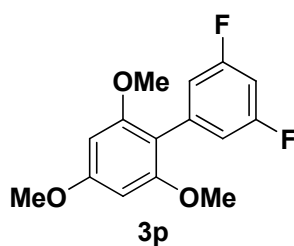

**3',5'-difluoro-2,4,6-trimethoxybiphenyl (3p).** Colorless solid (48 mg, 85% yield).  $^1\text{H}$ -NMR (400 MHz,  $\text{CDCl}_3$ )  $\delta$  3.74 (s, 6H), 3.86 (s, 3H), 5.99 (s, 2H), 6.21 (s, 2H), 6.72 (m, 1H), 6.86 (m, 2H).

$^{13}\text{C}$ -NMR(100 MHz,  $\text{CDCl}_3$ )  $\delta$  55.41, 55.84, 90.79, 101.85 (t,  $J=25$  Hz), 110.19 (t,  $J=2.2$  Hz), 114.18 (q,  $J=5.5$  Hz), 137.39 (t,  $J=9.9$  Hz), 158.15, 161.17 (t,  $J=5.7$  Hz), 163.60 (d,  $J=13.2$  Hz).  $^{19}\text{F}$ -NMR (377 MHz,  $\text{CDCl}_3$ ):  $\delta$  -112(s). HRMS (EI)  $m/z$  calcd for  $\text{C}_{15}\text{H}_{14}\text{F}_2\text{O}_3$ : 280.0911; found: 280.0893.

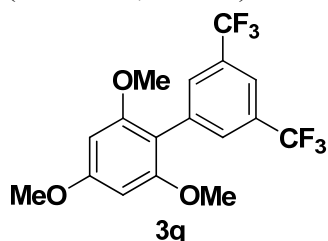

**2,4,6-trimethoxy-3',5'-bis(trifluoromethyl)biphenyl (3q).** Colorless solid (71 mg, 93% yield).  $^1\text{H}$ -NMR (400 MHz,  $\text{CDCl}_3$ )  $\delta$  3.74 (s, 6H), 3.86 (s, 3H), 5.99 (s, 2H), 6.21 (s, 2H), 6.72 (m, 1H), 6.86 (m, 2H).  $^{13}\text{C}$ -NMR (100 MHz,  $\text{CDCl}_3$ )  $\delta$  55.45, 55.79, 90.83, 109.25, 120.05 (m), 123.73 (q,  $J=273.2$  Hz), 130.57 (q,  $J=31.8$  Hz), 131.695 (d,  $J=3.0$  Hz), 136.26, 158.19, 161.65.  $^{19}\text{F}$ -NMR (377 MHz,  $\text{CDCl}_3$ ):  $\delta$  -62.7(s). HRMS (EI)  $m/z$  calcd for  $\text{C}_{17}\text{H}_{14}\text{F}_6\text{O}_3$ : 380.0847; found: 380.0842.

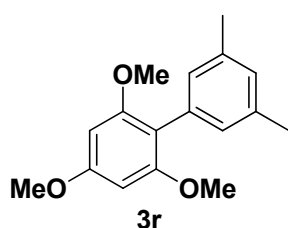

**2,4,6-trimethoxy-3',5'-dimethylbiphenyl (3r).** Colorless solid (51 mg, 95% yield).  $^1\text{H}$ -NMR (400 MHz,  $\text{CDCl}_3$ )  $\delta$  2.33 (s, 6H), 3.70 (s, 6H), 3.84 (s, 3H), 6.21 (s, 2H), 6.92 (s, 3H).  $^{13}\text{C}$ -NMR (100 MHz,  $\text{CDCl}_3$ )  $\delta$  21.50, 55.40, 55.95, 90.95, 112.86, 128.58, 128.98, 133.93, 136.93, 158.48, 160.43. HRMS (EI)  $m/z$  calcd for  $\text{C}_{17}\text{H}_{20}\text{O}_3$ : 272.1412; found: 272.1408.

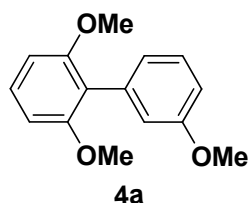

**2,3',6-trimethoxybiphenyl (4a).** Spectral data corresponds to that previously reported. Colorless solid (26% and 91% yield respectively).  $^1\text{H}$ -NMR (400 MHz,  $\text{CDCl}_3$ )  $\delta$  3.73 (s, 6H), 3.81 (s, 3H), 6.65 (d, 2H,  $J=8.8$  Hz), 6.90 (m, 3H), 7.29 (m, 2H).  $^{13}\text{C}$ -NMR(100 MHz,  $\text{CDCl}_3$ )  $\delta$  55.16, 55.96, 104.23, 112.38, 116.69, 119.45, 123.39, 128.58, 128.73, 135.52, 157.73, 159.03.

**Reference:** Jean-Michel Becht; Arnaud Gissot; Alain Wagner; Charles Mioskowski. *Chem. Eur. J.* **2003**, *9*, 3209.

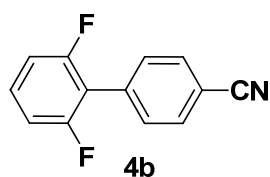

**2',6'-difluorobiphenyl-4-carbonitrile (4b).** Spectral data corresponds to that previously reported. Colorless solid (13% and 67% yield respectively).  $^1\text{H}$ -NMR (400 MHz,  $\text{CDCl}_3$ )  $\delta$  3.76 (s, 6H), 6.67 (d, 2H,  $J=8.0$  Hz), 6.99-7.05 (m, 1H), 7.07-7.11 (m, 1H), 7.13-7.16 (m, 1H), 7.31 (t, 1H,  $J=8.0$  Hz),

7.36-7.39(m, 1H).  $^{13}\text{C}$ -NMR(100 MHz,  $\text{CDCl}_3$ )  $\delta$  111.96 (q,  $J=19.6$  Hz), 116.72 (t,  $J=18.5$  Hz), 118.62, 130.25 (t,  $J=9.9$  Hz), 131.13 (t,  $J=1.2$  Hz), 132.01, 134.10, 158.57 (d,  $J=6.3$  Hz), 161.05 (d,  $J=6.5$  Hz).  $^{19}\text{F}$ -NMR (377 MHz,  $\text{CDCl}_3$ ):  $\delta$  -114.34 (s, 2F).

**Reference:** Rui Shang; Yao Fu; Yan Wang; Qing Xu; Hai-Zhu Yu; Lei Liu *Angew. Chem. Int. Ed.* **2009**, *48*, 9350.

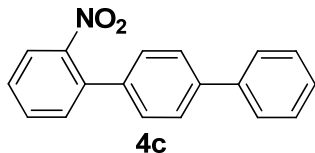

**4'-phenyl-2-nitrobiphenyl (4c).** Yellow solid (15% and 64% yield respectively).  $^1\text{H}$ -NMR (400 MHz,  $\text{CDCl}_3$ )  $\delta$  7.38 (m, 3H), 7.47 (m, 4H), 7.64 (m, 5H), 7.87 (m, 1H).  $^{13}\text{C}$ -NMR(100 MHz,  $\text{CDCl}_3$ )  $\delta$  124.17, 127.17, 127.45, 127.61, 128.21, 128.37, 128.86, 131.98, 132.32, 136.02, 136.29, 140.42, 141.17, 149.37. HRMS (EI)  $m/z$  calcd for  $\text{C}_{18}\text{H}_{13}\text{NO}_2$ : 275.0946; found: 275.0914.

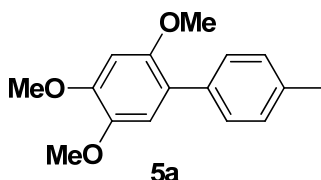

**2,4,5-trimethoxy-4'-methylbiphenyl (5a).** Colorless solid (34 mg, 65% yield).  $^1\text{H}$ -NMR (400 MHz,  $\text{CDCl}_3$ )  $\delta$  2.42 (s, 3H), 3.79 (s, 3H), 3.90 (s, 3H), 3.97 (s, 3H), 6.66 (s, 1H), 6.91 (s, 1H), 7.25 (d, 2H,  $J=7.6$  Hz), 7.44 (d, 2H,  $J=7.2$  Hz).  $^{13}\text{C}$ -NMR(100 MHz,  $\text{CDCl}_3$ )  $\delta$  21.21, 56.21, 56.59, 56.76, 98.45, 114.49, 122.47, 128.86, 129.28, 135.46, 136.36, 143.29, 148.79, 150.75. HRMS (EI)  $m/z$  calcd for  $\text{C}_{16}\text{H}_{18}\text{O}_3$ : 258.1256; found: 258.1207.

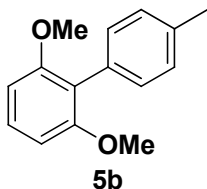

**2,6-dimethoxy-4'-methylbiphenyl (5b).** Spectral data corresponds to that previously reported. Colorless solid (33 mg, 73% yield).  $^1\text{H}$ -NMR (400 MHz,  $\text{CDCl}_3$ )  $\delta$  2.38 (s, 3H), 3.72 (s, 6H), 6.64 (d, 2H,  $J=8.8$  Hz), 7.23 (m, 5H).  $^{13}\text{C}$ -NMR(100 MHz,  $\text{CDCl}_3$ )  $\delta$  21.41, 55.94, 104.26, 106.24, 128.47, 128.56, 130.77, 131.08, 136.33, 157.83.

**Reference:** Gupta, Arun Kumar; Rim, Chul Yun; Oh, Chang Ho. *Synlett* **2004**, *12*, 2227.

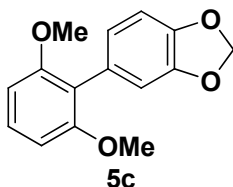

**5-(2,6-dimethoxyphenyl)benzo[d][1,3]dioxole (5c).** Spectral data corresponds to that previously reported. Colorless solid (42 mg, 81% yield).  $^1\text{H}$ -NMR (400 MHz,  $\text{CDCl}_3$ )  $\delta$  3.73 (s, 6H), 5.96 (s, 2H), 6.63 (d, 2H,  $J=8.8$  Hz), 6.83(m, 3H), 7.25(t, 3H,  $J=8.2$  Hz).  $^{13}\text{C}$ -NMR(100 MHz,  $\text{CDCl}_3$ )  $\delta$  55.97, 100.87, 104.24, 107.96, 111.58, 119.16, 124.23, 127.52, 128.55, 146.35, 147.08, 157.84.

**Reference:** Jean-Michel Becht; Arnaud Gissot; Alain Wagner; Charles Mioskowski. *Chem. Eur. J.* **2003**, *9*, 3209.

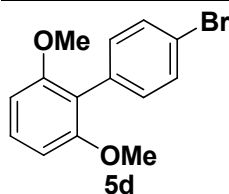

**4'-bromo-2,6-dimethoxybiphenyl (5d).** Colorless solid (42 mg, 72% yield).  $^1\text{H-NMR}$  (400 MHz,  $\text{CDCl}_3$ )  $\delta$  3.73 (s, 6H), 6.64 (d, 2H,  $J=8.4$  Hz), 7.22 (d, 2H,  $J=8.4$  Hz), 7.28 (t, 1H,  $J=8.4$  Hz), 7.51 (d, 2H,  $J=8.4$  Hz).  $^{13}\text{C-NMR}$ (100 MHz,  $\text{CDCl}_3$ )  $\delta$  55.91, 104.24, 118.29, 120.85, 129.04, 130.86, 132.74, 133.08, 157.54.

**Reference:** Jean-Michel Becht; Claude Le Drian *Org. Lett.*, **2008**, *10*, 3161.

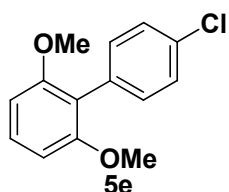

**4'-chloro-2,6-dimethoxybiphenyl (5e).** Spectral data corresponds to that previously reported. Colorless solid (37 mg, 76% yield).  $^1\text{H-NMR}$  (400 MHz,  $\text{CDCl}_3$ )  $\delta$  3.73 (s, 6H), 6.65 (d, 2H,  $J=8.4$  Hz), 7.26-7.30 (m, 3H), 7.36 (d, 2H,  $J=8.8$  Hz).  $^{13}\text{C-NMR}$ (100 MHz,  $\text{CDCl}_3$ )  $\delta$  55.90, 104.23, 118.30, 127.92, 129.0, 132.38, 132.56, 132.60, 157.60.

**Reference:** Jean-Michel Becht; Cedric Catala; Claude Le Drian; Alain Wagner *Org. Lett.*, **2007**, *9*, 1781.

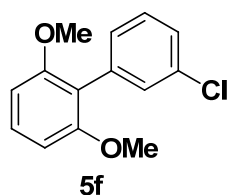

**3'-chloro-2,6-dimethoxybiphenyl (5f).** Colorless solid (32 mg, 64% yield).  $^1\text{H-NMR}$  (400 MHz,  $\text{CDCl}_3$ )  $\delta$  3.73 (s, 6H), 6.64 (d, 2H,  $J=8.0$  Hz), 7.21-7.34 (m, 5H).  $^{13}\text{C-NMR}$ (100 MHz,  $\text{CDCl}_3$ )  $\delta$  55.91, 104.19, 118.16, 126.86, 128.83, 129.18, 129.24, 131.08, 133.43, 136.03, 157.59. HRMS (EI)  $m/z$  calcd for  $\text{C}_{14}\text{H}_{13}\text{O}_2\text{Cl}$ : 248.0604; found: 248.0598.

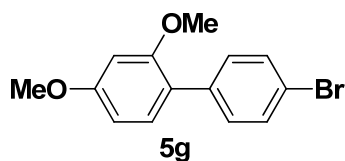

**4'-bromo-2,4-dimethoxybiphenyl (5g).** Colorless solid (33 mg, 57% yield).  $^1\text{H-NMR}$  (400 MHz,  $\text{CDCl}_3$ )  $\delta$  3.79 (s, 3H), 3.84 (s, 3H), 6.55 (s, 1H), 6.56 (m, 1H), 7.36 (d, 2H,  $J=9.2$  Hz), 7.49 (d, 2H,  $J=9.2$  Hz).  $^{13}\text{C-NMR}$ (100 MHz,  $\text{CDCl}_3$ )  $\delta$  55.45, 55.53, 99.08, 104.79, 120.55, 122.35, 131.04, 131.08, 131.10, 137.30, 157.38, 160.63. HRMS (EI)  $m/z$  calcd for  $\text{C}_{14}\text{H}_{13}\text{BrO}_2$ : 292.0099; found: 292.0097.

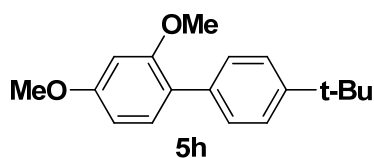

**4'-tert-butyl-2,4-dimethoxybiphenyl (5h).** Colorless solid (35 mg, 66% yield).  $^1\text{H-NMR}$  (400 MHz,

CDCl<sub>3</sub>)  $\delta$  1.27 (s, 9H), 3.71 (s, 3H), 3.76 (s, 3H), 6.47 (m, 2H), 7.17(d, 1H,  $J=9.6$  Hz), 7.35 (m, 4H). <sup>13</sup>C-NMR(100 MHz, CDCl<sub>3</sub>)  $\delta$  30.37, 33.45, 54.36, 54.48, 97.93, 103.55, 122.43, 123.92, 127.99, 130.19, 134.32, 148.18, 156.47, 159.1. HRMS (EI)  $m/z$  calcd for C<sub>18</sub>H<sub>22</sub>O<sub>2</sub>: 270.1620; found: 270.1614.

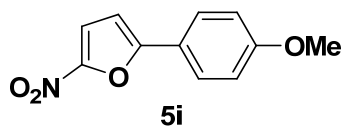

**2-(4-methoxyphenyl)-5-nitrofuran (5i).** Yellow solid (37 mg, 85% yield). <sup>1</sup>H-NMR (400 MHz, CDCl<sub>3</sub>)  $\delta$  3.87 (s, 3H), 6.70 (d, 1H,  $J=3.6$  Hz), 6.98 (d, 2H,  $J=8.8$  Hz), 7.40 (d, 1H,  $J=3.6$  Hz), 7.74 (d, 2H,  $J=8.8$  Hz). <sup>13</sup>C-NMR (100 MHz, CDCl<sub>3</sub>)  $\delta$  55.47, 106.38, 114.53, 114.66, 120.68, 127.03, 157.1, 161.46, 167.72. HRMS (EI)  $m/z$  calcd for C<sub>11</sub>H<sub>9</sub>NO<sub>4</sub>: 219.0532; found: 219.0454.

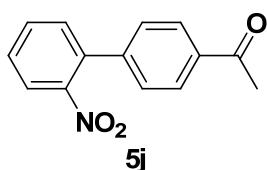

**1-(2'-nitrophenyl-4-yl)ethanone (5j).** Spectral data corresponds to that previously reported. Yellow solid (15 mg, 32% yield). <sup>1</sup>H-NMR (400 MHz, CDCl<sub>3</sub>)  $\delta$  2.64 (s, 3H), 7.43(m, 3H), 7.54 (m, 1H), 7.66 (m, 1H), 7.94 (d, 1H,  $J=8.4$  Hz), 8.02 (d, 2H,  $J=8.4$  Hz). <sup>13</sup>C-NMR (100 MHz, CDCl<sub>3</sub>)  $\delta$  26.67, 124.43, 128.25, 128.68, 128.91, 130.92, 131.74, 132.62, 135.52, 136.68, 142.35, 197.49.

**Reference:** Lukas J. Goossen; Nuria Rodriguez; Bettina Melzer; Christophe Linder; Guojun Deng; Laura M. Levy. *J. Am. Chem. Soc.* **2007**, *129*, 4824.

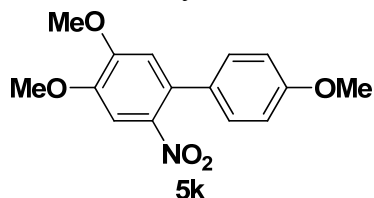

**4,4',5-trimethoxy-2-nitrobiphenyl (5k).** Spectral data corresponds to that previously reported. Yellow solid (26 mg, 43% yield). <sup>1</sup>H-NMR (400 MHz, CDCl<sub>3</sub>)  $\delta$  3.85 (s, 3H), 3.95 (s, 3H), 3.97 (s, 3H), 6.77 (s, 1H), 6.95 (d, 2H,  $J=8.8$  Hz), 7.22 (d, 2H,  $J=8.8$  Hz), 7.51 (s, 1H). <sup>13</sup>C-NMR (100 MHz, CDCl<sub>3</sub>)  $\delta$  55.32, 56.42, 56.45, 107.85, 113.73, 114.04, 129.25, 130.45, 130.92, 141.22, 147.86, 152.18, 159.42.

**Reference:** Becht, Jean-Michel; Catala, Cedric; Drian, Claude Le; Wagner, Alain *Org. Lett.* **2007**, *9*, 1781.

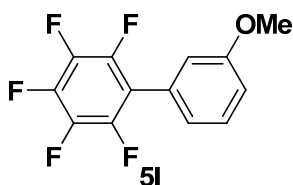

**2,3,4,5,6-pentafluoro-3'-methoxybiphenyl (5l).** Spectral data corresponds to that previously reported. Colorless solid (39 mg, 72% yield). <sup>1</sup>H-NMR (400 MHz, CDCl<sub>3</sub>)  $\delta$  3.84 (s, 3H), 6.94 (s, 1H), 6.99 (m, 1H), 7.40 (t, 1H,  $J=8.0$  Hz). <sup>13</sup>C-NMR (100 MHz, CDCl<sub>3</sub>)  $\delta$  55.4, 114.96, 115.95, 115.95 (dt,  $J=4.1$  Hz,  $J=18.0$  Hz), 122.56, 127.58, 129.81, 137.93 (dm,  $J=250.4$  Hz), 140.55 (dm,

$J=246.8$  Hz), 144.26 (dm,  $J=246.8$  Hz), 159.8.  $^{19}\text{F}$ -NMR (377 MHz,  $\text{CDCl}_3$ )  $\delta$  -162.29 (m, 2F), -155.63 (t, 1F,  $J=21.5$  Hz), -142.80 (dd, 2F,  $J=23.4$  Hz,  $J=8.3$  Hz).

**Reference:** Lafrance, M.; Rowley, C. N.; Woo, T. K.; Fagnou, K. *J. Am. Chem. Soc.* **2006**, *128*, 8754.

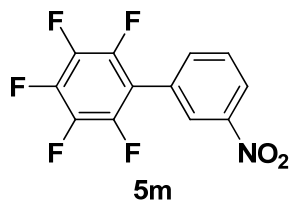

**2,3,4,5,6-pentafluoro-3'-nitrobiphenyl (5m).** Spectral data corresponds to that previously reported. Yellow solid (47 mg, 81% yield).  $^1\text{H}$ -NMR (400 MHz,  $\text{CDCl}_3$ )  $\delta$  7.71 (m, 1H), 7.78 (m, 1H), 8.35 (m, 2H).  $^{13}\text{C}$ -NMR (100 MHz,  $\text{CDCl}_3$ )  $\delta$  113.59 (dt,  $J=3.6$  Hz,  $J=16.9$  Hz), 124.23, 125.26, 128.06, 129.89, 136.09, 138.02 (dm,  $J=254.9$  Hz), 141.26 (dm,  $J=255$  Hz), 144.16 (dm,  $J=248.3$  Hz), 148.47.  $^{19}\text{F}$ -NMR (377 MHz,  $\text{CDCl}_3$ )  $\delta$  -160.83 (m, 2F), -152.76 (t, 1F,  $J=21.1$  Hz), -142.84 (dd, 2F,  $J=22.2$  Hz,  $J=8.3$  Hz).

**Reference:** Rui Shang; Yao Fu; Yan Wang; Qing Xu; Hai-Zhu Yu; Lei Liu *Angew. Chem. Int. Ed.* **2009**, *48*, 9350.

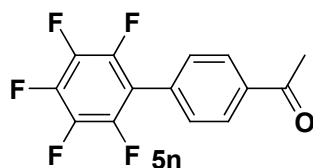

**1-(2',3',4',5',6'-pentafluorobiphenyl-4-yl)ethanone (5n).** Spectral data corresponds to that previously reported. Colorless solid (49 mg, 85% yield).  $^1\text{H}$ -NMR (400 MHz,  $\text{CDCl}_3$ )  $\delta$  2.66 (s, 3H), 7.55 (d, 2H,  $J=8.4$  Hz), 8.08 (d, 2H,  $J=8.0$  Hz).  $^{13}\text{C}$ -NMR (100 MHz,  $\text{CDCl}_3$ ):  $\delta$  26.61, 114.89 (dt,  $J=4.1$  Hz,  $J=16.1$  Hz), 128.56, 130.48, 131.06, 137.52, 137.93 (dm,  $J=244.9$  Hz), 140.87 (dm,  $J=253.6$  Hz), 144.09 (dm,  $J=247.4$  Hz), 197.29.  $^{19}\text{F}$ -NMR (377 MHz,  $\text{CDCl}_3$ )  $\delta$  -161.54 (m, 2F), -154.03 (t, 1F,  $J=20.4$  Hz), -142.78 (dd, 2F,  $J=22.2$  Hz,  $J=8.3$  Hz).

**Reference:** Lafrance, M.; Shore, D.; Fagnou, K. *Org. Lett.* **2006**, *8*, 5097.

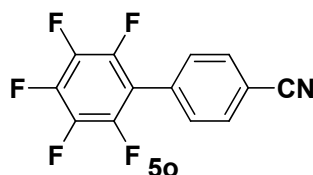

**2',3',4',5',6'-pentafluorobiphenyl-4-carbonitrile (5o).** Spectral data corresponds to that previously reported. Colorless solid (53 mg, 98% yield).  $^1\text{H}$ -NMR (400 MHz,  $\text{CDCl}_3$ )  $\delta$  7.59 (d, 2H,  $J=7.6$  Hz), 7.82 (d, 2H,  $J=7.6$  Hz).  $^{13}\text{C}$ -NMR (100 MHz,  $\text{CDCl}_3$ )  $\delta$  113.46, 114.18 (dt,  $J=3.5$  Hz,  $J=16.7$  Hz), 118.15, 130.97, 131.06, 132.54, 138.08 (dm,  $J=252.0$  Hz), 141.29 (dm,  $J=254.6$  Hz), 144.14 (dm,  $J=252.4$  Hz).  $^{19}\text{F}$ -NMR (377 MHz,  $\text{CDCl}_3$ )  $\delta$  -161.01 (m, 2F), -152.94 (t, 1F,  $J=21.3$  Hz), -142.76 (dd, 2F,  $J=21.9$  Hz,  $J=8.3$  Hz).

**Reference:** Lafrance, M.; Shore, D.; Fagnou, K. *Org. Lett.* **2006**, *8*, 5097.



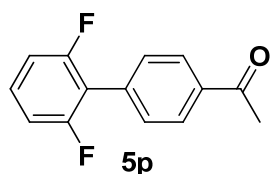

**1-(2',6'-difluorobiphenyl-4-yl)ethanone (5p).** Colorless solid (23 mg, 50% yield).  $^1\text{H-NMR}$  (400 MHz,  $\text{CDCl}_3$ )  $\delta$  2.65 (s, 3H), 7.01 (m, 2H), 7.33 (m, 1H), 7.58 (d, 2H,  $J=8.0$  Hz), 8.05 (d, 2H,  $J=8.4$  Hz).  $^{13}\text{C-NMR}$  (100 MHz,  $\text{CDCl}_3$ )  $\delta$  55.29, 111.6 (dd,  $J=7.4$  Hz,  $J=19.7$  Hz), 117.49 (t,  $J=19.4$  Hz), 128.20, 129.71 (t,  $J=10.0$  Hz), 130.63, 134.13, 136.63, 159.98 (dd,  $J=6.1$  Hz,  $J=247.6$  Hz).  $^{19}\text{F-NMR}$  (377 MHz,  $\text{CDCl}_3$ )  $\delta$  -114.21 (s, 2F). HRMS (EI)  $m/z$  calcd for  $\text{C}_{14}\text{H}_{10}\text{OF}_2$ : 232.0700; found: 232.0643.

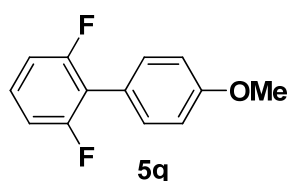

**2,6-difluoro-4'-methoxybiphenyl (5q).** Spectral data corresponds to that previously reported. Colorless solid (23 mg, 52% yield).  $^1\text{H-NMR}$  (400 MHz,  $\text{CDCl}_3$ )  $\delta$  3.85 (s, 3H), 6.97 (m, 4H), 7.23 (m, 1H), 7.41 (d, 2H,  $J=8.4$  Hz).  $^{13}\text{C-NMR}$  (100 MHz,  $\text{CDCl}_3$ )  $\delta$  55.29, 111.6 (dd,  $J=7.4$  Hz,  $J=19.7$  Hz), 113.81, 118.19 (t,  $J=18.4$  Hz), 121.28, 128.34 (t,  $J=10.1$  Hz), 131.52, 159.49, 160.21 (dd,  $J=7.5$  Hz,  $J=246.7$  Hz).  $^{19}\text{F-NMR}$  (377 MHz,  $\text{CDCl}_3$ )  $\delta$  -114.77 (s, 2F).

**Reference:** Wei, Ye; Kan, Jian; Wang, Min; Su, Weiping; Hong, Maochun *Org. Lett.* **2009**, *11*, 3346.

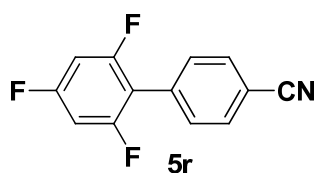

**2',4',6'-trifluorobiphenyl-4-carbonitrile (5r).** Colorless solid (29 mg, 64% yield).  $^1\text{H-NMR}$  (400 MHz,  $\text{CDCl}_3$ )  $\delta$  6.80 (m, 2H), 7.55 (m, 2H), 7.75 (m, 2H).  $^{13}\text{C-NMR}$  (100 MHz,  $\text{CDCl}_3$ )  $\delta$  99.89 (m), 111.26, 117.47, 130.05, 131.11, 132.25, 157.84 (dd,  $J=9.1$  Hz,  $J=14.7$  Hz), 160.29 (m), 162.80 (t,  $J=15.1$  Hz).  $^{19}\text{F-NMR}$  (377 MHz,  $\text{CDCl}_3$ )  $\delta$  -111.06 (d, 2F), -106.43 (t, 1F). HRMS (EI)  $m/z$  calcd for  $\text{C}_{13}\text{H}_6\text{NF}_3$ : 233.0452; found: 233.0428.

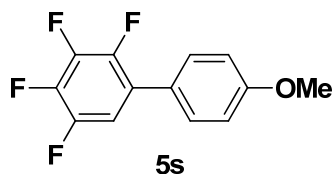

**2,3,4,5-tetrafluoro-4'-methoxybiphenyl (5s).** Colorless solid (35 mg, 68% yield).  $^1\text{H-NMR}$  (400 MHz,  $\text{CDCl}_3$ )  $\delta$  3.85 (s, 3H), 6.97-7.05 (m, 3H), 7.40-7.43 (m, 2H).  $^{13}\text{C-NMR}$  (100 MHz,  $\text{CDCl}_3$ )  $\delta$  55.36, 110.47 (dt,  $J=3.2$  Hz,  $J=19.7$  Hz), 114.31, 125.13(m), 125.39, 129.30 (d,  $J=0.8$  Hz), 139.32 (dm,  $J=252.9$  Hz), 141.25 (dm,  $J=251.2$  Hz), 144.79 (dm,  $J=242.4$  Hz), 147.04 (dm,  $J=244.4$  Hz), 160.4.  $^{19}\text{F-NMR}$  (377 MHz,  $\text{CDCl}_3$ )  $\delta$  -158.11 (m, 1F), -155.50 (m, 1F), -144.12 (m, 1F), -139.92 (m, 1F). HRMS (EI)  $m/z$  calcd for  $\text{C}_{13}\text{H}_8\text{FO}_4$ : 256.0511; found: 256.0465.

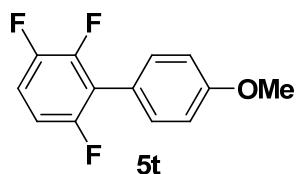

**2,3,6-trifluoro-4'-methoxybiphenyl (5t).** Spectral data corresponds to that previously reported. Colorless solid (46 mg, 98% yield).  $^1\text{H-NMR}$  (400 MHz,  $\text{CDCl}_3$ )  $\delta$  3.86 (s, 3H), 6.89 (m, 1H,  $J=2.4$  Hz,  $J=3.6$  Hz,  $J=9.2$  Hz), 7.00 (d, 2H,  $J=9.2$  Hz), 7.40 (m, 2H,  $J=8.8$  Hz).  $^{13}\text{C-NMR}$  (100 MHz,  $\text{CDCl}_3$ )  $\delta$  99.89 (m), 111.26, 117.47, 130.05, 131.11, 132.25, 157.84 (dd,  $J=9.1$  Hz,  $J=14.7$  Hz), 160.29 (m), 162.80 (t,  $J=15.1$  Hz).  $^{19}\text{F-NMR}$  (377 MHz,  $\text{CDCl}_3$ )  $\delta$  -142.20 (dd,  $J=15.1$  Hz,  $J=21.1$  Hz 1F), -138.16 (dd,  $J=4.5$  Hz,  $J=20.7$  Hz, 1F), -120.0 (dd,  $J=4.1$  Hz,  $J=15.1$  Hz, 1F). HRMS (EI)  $m/z$  calcd for  $\text{C}_{13}\text{H}_9\text{OF}_3$ : 238.0605; found: 238.0604.

**Reference:** Rui Shang; Yao Fu; Yan Wang; Qing Xu; Hai-Zhu Yu; Lei Liu *Angew. Chem. Int. Ed.* **2009**, *48*, 9350.

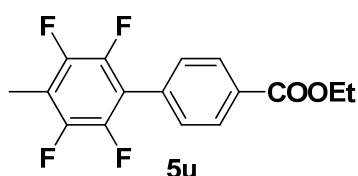

**Ethyl 2',3',5',6'-tetrafluoro-4'-methylbiphenyl-4-carboxylate (5u).** Spectral data corresponds to that previously reported. Colorless solid (45 mg, 72% yield).  $^1\text{H-NMR}$  (400 MHz,  $\text{CDCl}_3$ )  $\delta$  1.42 (t, 3H,  $J=7.2$  Hz), 2.33 (t, 3H,  $J=2.4$  Hz), 4.41 (q, 2H,  $J=7.2$  Hz), 7.53 (dm, 2H,  $J=8.4$  Hz), 8.15 (dm, 2H,  $J=8.4$  Hz).  $^{13}\text{C-NMR}$  (100 MHz,  $\text{CDCl}_3$ )  $\delta$  7.68, 14.34, 61.24, 116.61 (t,  $J=18.6$  Hz), 117.06 (t,  $J=15.6$  Hz), 129.71, 130.27 (t,  $J=1.8$  Hz), 130.91, 132.28, 143.57 (dm,  $J=239.2$  Hz), 145.42 (dm,  $J=245.8$  Hz), 166.11.  $^{19}\text{F-NMR}$  (377 MHz,  $\text{CDCl}_3$ )  $\delta$  -145.26 (dd,  $J=12.8$  Hz,  $J=22.2$  Hz 2F), -143.58 (dd,  $J=12.1$  Hz,  $J=21.5$  Hz, 2F).

**Reference:** Rui Shang; Yao Fu; Yan Wang; Qing Xu; Hai-Zhu Yu; Lei Liu *Angew. Chem. Int. Ed.* **2009**, *48*, 9350.

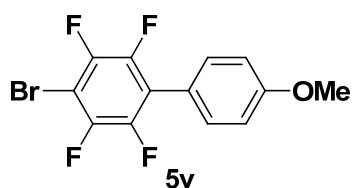

**4-bromo-2,3,5,6-tetrafluoro-4'-methoxybiphenyl (5v).** Colorless solid (62 mg, 92% yield).  $^1\text{H-NMR}$  (400 MHz,  $\text{CDCl}_3$ )  $\delta$  3.86 (s, 3H), 7.01 (d, 2H,  $J=8.8$  Hz), 7.39 (d, 2H,  $J=8.8$  Hz).  $^{13}\text{C-NMR}$  (100 MHz,  $\text{CDCl}_3$ )  $\delta$  55.33, 97.94 (t,  $J=22.6$  Hz), 114.22, 118.95, 120.10 (t,  $J=16.2$  Hz), 131.36, 144.10 (dm,  $J=247.2$  Hz), 145.35 (dm,  $J=245.8$  Hz), 160.38.  $^{19}\text{F-NMR}$  (377 MHz,  $\text{CDCl}_3$ )  $\delta$  -142.43 (m, 2F), -133.90 (m, 2F). HRMS (EI)  $m/z$  calcd for  $\text{C}_{13}\text{H}_7\text{OF}_4\text{Br}$ : 333.9616; found: 333.9616.

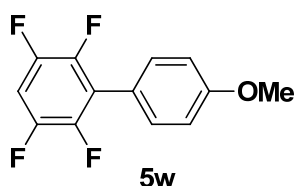

**2,3,5,6-tetrafluoro-4'-methoxybiphenyl (5w).** Spectral data corresponds to that previously reported. Colorless solid (32 mg, 62% yield).  $^1\text{H-NMR}$  (400 MHz,  $\text{CDCl}_3$ )  $\delta$  3.86 (s, 3H), 7.01 (m, 3H), 7.40 (m, 2H).  $^{13}\text{C-NMR}$  (100 MHz,  $\text{CDCl}_3$ )  $\delta$  55.31, 104.27 (t,  $J=22.6$  Hz), 114.13, 119.56 (t,  $J=1.8$  Hz), 121.26 (t,  $J=16.1$  Hz), 131.43 (t,  $J=1.5$  Hz), 143.78 (dm,  $J=242.5$  Hz), 146.29 (dm,  $J=245.6$  Hz), 160.23.  $^{19}\text{F-NMR}$  (377 MHz,  $\text{CDCl}_3$ )  $\delta$  -144.26 (m, 2F), -139.44 (m, 2F).

**Reference:** Rui Shang; Yao Fu; Yan Wang; Qing Xu; Hai-Zhu Yu; Lei Liu *Angew. Chem. Int. Ed.* **2009**, *48*, 9350.

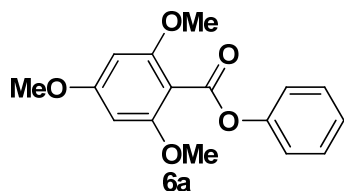

**phenyl 2,4,6-trimethoxybenzoate (6a).** Colorless solid (51 mg, 90% yield).  $^1\text{H-NMR}$  (400 MHz,  $\text{CDCl}_3$ )  $\delta$  3.84 (s, 3H), 3.86 (s, 6H), 6.15 (s, 2H), 7.23-7.25 (m, 3H), 7.38-7.41 (m, 2H).  $^{13}\text{C-NMR}$  (100 MHz,  $\text{CDCl}_3$ )  $\delta$  55.48, 55.09, 90.75, 105.45, 121.88, 125.64, 129.30, 151.31, 159.14, 163.05, 164.82. HRMS (EI)  $m/z$  calcd for  $\text{C}_{16}\text{H}_{16}\text{O}_5$ : 288.0998; found: 288.0990.

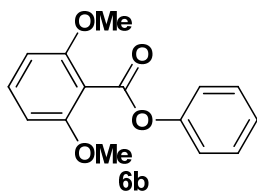

**phenyl 2,6-dimethoxybenzoate (6b).** Colorless solid (49 mg, 95% yield).  $^1\text{H-NMR}$  (400 MHz,  $\text{CDCl}_3$ )  $\delta$  3.86 (s, 6H), 6.59 (d, 2H,  $J=8.4$  Hz), 7.21-7.27 (m, 3H), 7.32 (t, 1H,  $J=8.4$  Hz), 7.37-7.42 (m, 2H).  $^{13}\text{C-NMR}$  (100 MHz,  $\text{CDCl}_3$ )  $\delta$  56.16, 104.06, 112.53, 121.88, 125.85, 129.40, 131.63, 151.18, 157.69, 165.05. HRMS (EI)  $m/z$  calcd for  $\text{C}_{15}\text{H}_{14}\text{O}_4$ : 258.0892; found: 258.0899.

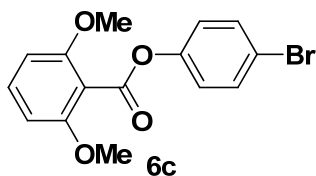

**4-bromophenyl 2,6-dimethoxybenzoate (6c).** Colorless solid (45 mg, 68% yield).  $^1\text{H-NMR}$  (400 MHz,  $\text{CDCl}_3$ )  $\delta$  3.86 (s, 6H), 6.59 (d, 2H,  $J=8.4$  Hz), 7.15 (d, 2H,  $J=8.4$  Hz), 7.33 (t, 1H,  $J=8.4$  Hz), 7.51 (d, 2H,  $J=8.4$  Hz).  $^{13}\text{C-NMR}$  (100 MHz,  $\text{CDCl}_3$ )  $\delta$  56.14, 104.04, 112.06, 118.91, 123.71, 131.85, 132.43, 150.18, 157.69, 164.68. HRMS (EI)  $m/z$  calcd for  $\text{C}_{15}\text{H}_{13}\text{BrO}_4$ : 335.9997; found: 335.9992.

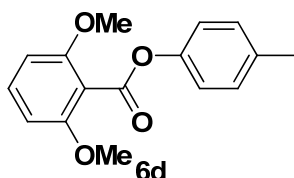

**p-tolyl 2,6-dimethoxybenzoate (6d).** Colorless solid (44 mg, 81% yield).  $^1\text{H-NMR}$  (400 MHz,  $\text{CDCl}_3$ )  $\delta$  2.34 (s, 3H), 3.85 (s, 6H), 6.58 (d, 2H,  $J=8.4$  Hz), 7.11-7.20 (m, 4H), 7.30 (t, 1H,  $J=8.4$  Hz).  $^{13}\text{C-NMR}$  (100 MHz,  $\text{CDCl}_3$ )  $\delta$  20.92, 56.51, 104.06, 112.65, 121.54, 129.92, 131.56, 135.44, 148.93, 157.66, 165.26. HRMS (EI)  $m/z$  calcd for  $\text{C}_{16}\text{H}_{16}\text{O}_4$ : 272.1049; found: 272.1045.

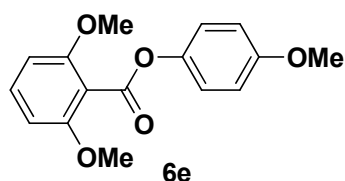

**4-methoxyphenyl 2,6-dimethoxybenzoate (6e).** Colorless solid (51 mg, 89% yield).  $^1\text{H-NMR}$  (400 MHz,  $\text{CDCl}_3$ )  $\delta$  3.79 (s, 3H), 3.86 (s, 6H), 6.58 (d, 2H,  $J=8.0\text{Hz}$ ), 6.91 (dt, 2H,  $J=3.0\text{ Hz}$ ,  $J=9.2\text{ Hz}$ ), 7.17 (dt, 2H,  $J=3.0\text{ Hz}$ ,  $J=9.2\text{ Hz}$ ), 7.31 (t, 1H,  $J=8.4\text{ Hz}$ ).  $^{13}\text{C-NMR}$  (100 MHz,  $\text{CDCl}_3$ )  $\delta$  55.61, 56.14, 104.05, 112.06, 114.45, 112.60, 114.45, 122.60, 131.56, 144.67, 157.34, 157.63, 165.43. HRMS (EI)  $m/z$  calcd for  $\text{C}_{16}\text{H}_{16}\text{O}_5$ : 288.0998; found: 288.0992.

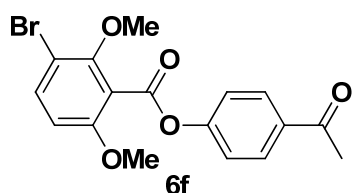

**4-acetylphenyl 3-bromo-2,6-dimethoxybenzoate (6f).** Colorless solid (50 mg, 66% yield).  $^1\text{H-NMR}$  (400 MHz,  $\text{CDCl}_3$ )  $\delta$  2.62 (s, 3H), 3.89 (s, 3H), 3.98 (s, 3H), 6.68 (d, 1H,  $J=9.2\text{ Hz}$ ), 7.35 (dt, 2H,  $J=2.4\text{ Hz}$ ,  $J=8.8\text{ Hz}$ ), 7.59 (d, 1H,  $J=9.2\text{ Hz}$ ), 8.05 (dt, 2H,  $J=2.8\text{ Hz}$ ,  $J=8.8\text{ Hz}$ ).  $^{13}\text{C-NMR}$  (100 MHz,  $\text{CDCl}_3$ )  $\delta$  26.62, 56.46, 62.39, 107.86, 108.61, 118.77, 121.87, 130.08, 135.07, 135.35, 154.47, 155.04, 156.97, 163.35, 196.85. HRMS (EI)  $m/z$  calcd for  $\text{C}_{17}\text{H}_{15}\text{BrO}_5$ : 378.0103; found: 378.0097.

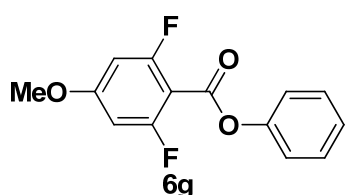

**phenyl 2,6-difluoro-4-methoxybenzoate (6g).** Colorless solid (33 mg, 62% yield).  $^1\text{H-NMR}$  (400 MHz,  $\text{CDCl}_3$ )  $\delta$  3.87 (s, 3H), 6.56 (d, 2H,  $J=10.4\text{ Hz}$ ), 7.28 (m, 3H), 7.45 (t, 2H,  $J=7.6\text{ Hz}$ ).  $^{13}\text{C-NMR}$  (100 MHz,  $\text{CDCl}_3$ )  $\delta$  56.12, 98.80 (dd,  $J=3.0\text{ Hz}$ ,  $J=26.4\text{ Hz}$ ), 102.54 (t,  $J=16.4\text{ Hz}$ ), 121.69, 126.09, 129.49, 150.51, 159.96 (t,  $J=2.7\text{ Hz}$ ), 162.76 (dd,  $J=9.2\text{ Hz}$ ,  $J=247.2\text{ Hz}$ ), 164.12.  $^{19}\text{F-NMR}$  (377 MHz,  $\text{CDCl}_3$ )  $\delta$  -106.59 (s, 2F). HRMS (EI)  $m/z$  calcd for  $\text{C}_{14}\text{H}_{10}\text{F}_2\text{O}_3$ : 264.0598; found: 264.0594.

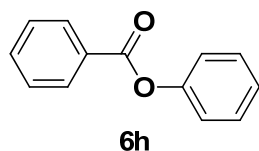

**phenyl benzoate (6h).** Spectral data corresponds to that previously reported. Colorless solid (28 mg, 70% yield).  $^1\text{H-NMR}$  (400 MHz,  $\text{CDCl}_3$ )  $\delta$  7.22 (d, 2H,  $J=7.2\text{ Hz}$ ), 7.27 (t, 1H,  $J=7.6\text{ Hz}$ ), 7.43 (t, 2H,  $J=8.0\text{ Hz}$ ), 7.51 (t, 2H,  $J=7.6\text{ Hz}$ ), 7.64 (t, 1H,  $J=7.6\text{ Hz}$ ), 8.21 (d, 2H,  $J=7.2\text{ Hz}$ ).  $^{13}\text{C-NMR}$  (100 MHz,  $\text{CDCl}_3$ )  $\delta$  121.74, 125.91, 128.59, 129.52, 129.62, 130.19, 133.60, 151.0, 165.22.

**Reference:** Jessica Salvadori; Evita Balducci; Silvia Zaza; Elena Petricci; Maurizio Taddei *J. Org. Chem.*, **2010**, *75*, 1841.

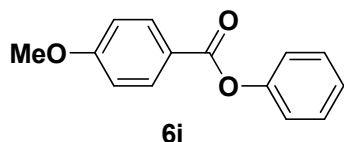

**phenyl 4-methoxybenzoate (6i).** Spectral data corresponds to that previously reported. Colorless solid (45 mg, 93% yield).  $^1\text{H-NMR}$  (400 MHz,  $\text{CDCl}_3$ )  $\delta$  3.88 (s, 3H), 6.98 (d, 2H,  $J=9.2$  Hz), 7.23 (m, 3H), 7.41 (t, 2H,  $J=7.6$  Hz), 8.15 (d, 2H,  $J=8.8$  Hz).  $^{13}\text{C-NMR}$ (100 MHz,  $\text{CDCl}_3$ )  $\delta$  55.52, 113.87, 121.83, 125.73, 129.45, 132.31, 151.14, 163.94, 164.93.

**Reference:** Changming Qin; Huayue Wu; Jiuxi Chen; Miaochang Liu; Jiang Cheng; Weike Su; Jinchang Ding *Org. Lett.* **2008**, *10*, 1537.

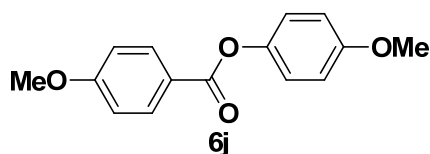

**4-methoxyphenyl 4-methoxybenzoate (6j).** Spectral data corresponds to that previously reported. Colorless solid (36 mg, 71% yield).  $^1\text{H-NMR}$  (400 MHz,  $\text{CDCl}_3$ )  $\delta$  3.81 (s, 3H), 3.88 (s, 3H), 6.92 (d, 2H,  $J=8.8$  Hz), 6.97 (d, 2H,  $J=8.8$  Hz), 7.11 (d, 2H,  $J=8.8$  Hz), 8.14 (d, 2H,  $J=8.8$  Hz).  $^{13}\text{C-NMR}$  (100MHz,  $\text{CDCl}_3$ )  $\delta$  55.51, 55.62, 113.83, 114.50, 121.98, 122.56, 132.26, 144.56, 157.24, 163.86, 165.30.

**Reference:** Helmi Neuvonen; Kari Neuvonen; Paavo Pasanen *J. Org. Chem.*, **2004**, *69*, 3794.

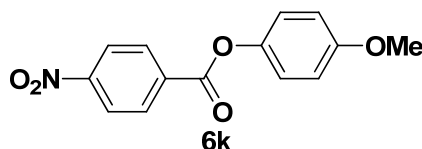

**4-methoxyphenyl 4-nitrobenzoate (6k).** Spectral data corresponds to that previously reported. Colorless solid (25 mg, 46% yield).  $^1\text{H-NMR}$  (400 MHz,  $\text{CDCl}_3$ )  $\delta$  3.83 (s, 3H), 6.96 (dt, 2H,  $J=3.2$  Hz,  $J=9.2$  Hz), 7.15 (dt, 2H,  $J=3.2$  Hz,  $J=9.2$  Hz), 8.36 (m, 4H).  $^{13}\text{C-NMR}$  (100 MHz,  $\text{CDCl}_3$ )  $\delta$  55.65, 114.68, 122.19, 123.71, 131.26, 135.11, 144.02, 150.89, 157.70, 163.68.

**Reference:** Helmi Neuvonen; Kari Neuvonen; Paavo Pasanen *J. Org. Chem.*, **2004**, *69*, 3794.

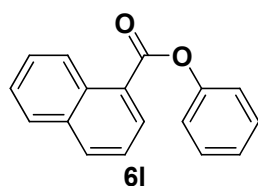

**phenyl 1-naphthoate (6l).** Spectral data corresponds to that previously reported. Colorless solid (30 mg, 62% yield).  $^1\text{H-NMR}$  (400 MHz,  $\text{CDCl}_3$ )  $\delta$  7.27-7.32 (m, 3H), 7.44-7.48 (m, 2H), 7.54-7.58 (m, 2H), 7.61-7.66 (m, 1H), 7.91 (d, 1H,  $J=8.0$  Hz), 8.09 (d, 1H,  $J=8.0$  Hz), 8.47 (dd, 1H,  $J=1.2$  Hz,  $J=7.2$  Hz), 9.04 (d, 1H,  $J=8.0$  Hz).  $^{13}\text{C-NMR}$ (100 MHz,  $\text{CDCl}_3$ )  $\delta$  120.87, 123.51, 124.74, 124.90, 125.39, 127.14, 127.66, 128.53, 130.17, 130.68, 132.92, 133.27, 144.99, 164.80.

**Reference:** Ramesh, Chinnasamy; Nakamura, Ryo; Kubota, Yoshihiro; Miwa, Minoru; Sugi, Yoshihiro *Synthesis* **2003**, *4*, 501.

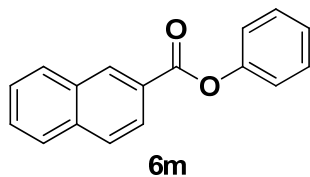

**phenyl 2-naphthoate (6m).** Colorless solid (33 mg, 66% yield).  $^1\text{H-NMR}$  (400 MHz,  $\text{CDCl}_3$ )  $\delta$  7.24-7.30 (m, 3H), 7.45 (t, 2H,  $J=8.4$  Hz), 7.55-7.59 (m, 2H), 7.60-7.64 (m, 2H), 7.94 (td, 3H,  $J=22.4$  Hz,  $J=8.0$  Hz), 8.19 (dd, 1H,  $J=8.8$  Hz,  $J=1.6$  Hz), 8.79 (s, 1H).  $^{13}\text{C-NMR}$ (100 MHz,  $\text{CDCl}_3$ )  $\delta$  121.81, 125.51, 125.95, 126.84, 126.88, 127.88, 128.43, 128.66, 129.53, 129.56, 135.87, 131.96, 132.56, 151.13, 165.40. HRMS (EI)  $m/z$  calcd for  $\text{C}_{17}\text{H}_{12}\text{O}_2$ : 248.0837; found: 248.0839.

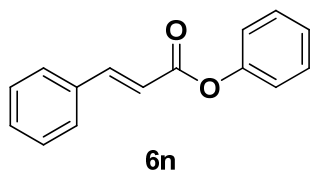

**phenyl cinnamate (6n).** Spectral data corresponds to that previously reported. Colorless solid (40 mg, 89% yield).  $^1\text{H-NMR}$  (400 MHz,  $\text{CDCl}_3$ )  $\delta$  6.63 (d, 1H,  $J=16.4$  Hz) 7.16-7.18 (m, 2H), 7.22-7.26 (m, 1H), 7.38-7.42 (m, 5H), 7.56-7.59 (m, 2H), 7.87 (d, 1H,  $J=16.0$  Hz).  $^{13}\text{C-NMR}$ (100 MHz,  $\text{CDCl}_3$ )  $\delta$  117.37, 121.68, 125.82, 128.34, 129.04, 129.48, 130.73, 134.23, 146.60, 150.87, 165.42.

**Reference:** Suman De Sarkar; Stefan Grimme; Armido Studer *J. Am. Chem. Soc.*, **2010**, *132*, 1190.

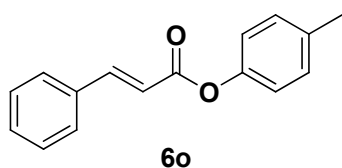

**p-tolyl cinnamate (6o).** Spectral data corresponds to that previously reported. Colorless solid (31 mg, 65% yield).  $^1\text{H-NMR}$  (400 MHz,  $\text{CDCl}_3$ )  $\delta$  2.38 (s, 3H), 6.65 (d, 1H,  $J=16.0\text{Hz}$ ), 7.07 (d, 2H,  $J=8.0\text{Hz}$ ), 7.22 (d, 2H,  $J=8.0\text{Hz}$ ), 7.43 (m, 3H), 7.59 (m, 2H), 7.88 (d, 1H,  $J=16.0\text{Hz}$ ).  $^{13}\text{C-NMR}$  (100MHz,  $\text{CDCl}_3$ )  $\delta$  20.92, 117.46, 121.34, 128.32, 129.01, 129.99, 130.68, 134.26, 135.44, 146.42, 148.60, 165.64

**Reference:** Kaitner, B.; Stilinovic, V. *Acta Cryst.* **2007**, *E63*, o4347.

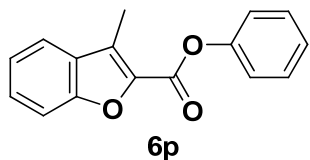

**phenyl 3-methylbenzofuran-2-carboxylate (6p).** Colorless solid (26 mg, 52% yield).  $^1\text{H-NMR}$  (400 MHz,  $\text{CDCl}_3$ )  $\delta$  2.67 (s, 3H), 7.25-7.36 (m, 4H), 7.42-7.51 (m, 3H), 7.59 (d, 1H,  $J=7.6$  Hz), 7.68 (d, 1H,  $J=8.0$  Hz).  $^{13}\text{C-NMR}$ (100 MHz,  $\text{CDCl}_3$ )  $\delta$  9.61, 112.35, 121.29, 121.78, 123.38, 126.17, 127.75, 128.35, 129.02, 129.57, 140.13, 150.25, 154.75, 158.85. HRMS (EI)  $m/z$  calcd for  $\text{C}_{16}\text{H}_{12}\text{O}_3$ : 252.0786; found: 252.0780.

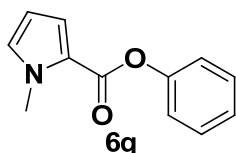

**phenyl 1-methyl-1H-pyrrole-2-carboxylate (6q).** Colorless solid (30 mg, 74% yield).  $^1\text{H-NMR}$  (400 MHz,  $\text{CDCl}_3$ )  $\delta$  3.95 (s, 3H), 6.19 (dd, 1H,  $J=2.4$  Hz,  $J=4.0$  Hz), 6.87 (t, 1H,  $J=2.4$  Hz), 7.16 (t, 1H,  $J=2.4$  Hz), 7.17-7.19 (m, 2H), 7.21-7.25 (m, 1H), 7.37-7.42 (m, 2H).  $^{13}\text{C-NMR}$ (100 MHz,  $\text{CDCl}_3$ )  $\delta$  35.83, 107.31, 118.17, 120.60, 120.97, 124.57, 128.36, 129.56, 149.65, 158.64. HRMS (EI)  $m/z$  calcd for  $\text{C}_{12}\text{H}_{11}\text{NO}_2$ : 201.0790; found: 201.0787.

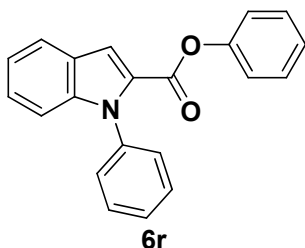

**phenyl 1-phenyl-1H-indole-2-carboxylate (6r).** Colorless solid (40 mg, 64% yield).  $^1\text{H-NMR}$  (400 MHz,  $\text{CDCl}_3$ )  $\delta$  7.11 (t, 3H,  $J=9.2$  Hz), 7.18-7.23 (m, 2H), 7.28-7.39 (m, 5H), 7.41-7.51 (m, 3H), 7.69 (s, 1H), 7.77 (d, 1H,  $J=8.0$  Hz), 8.09 (d, 1H,  $J=8.0$  Hz), 8.47 (dd, 1H,  $J=1.2$  Hz,  $J=7.2$  Hz), 9.04 (d, 1H,  $J=8.0$  Hz).  $^{13}\text{C-NMR}$ (100 MHz,  $\text{CDCl}_3$ )  $\delta$  111.72, 113.06, 121.55, 121.70, 122.71, 125.77, 126.08, 126.18, 128.01, 128.12, 128.29, 129.16, 129.38, 138.30, 141.19, 150.53, 159.57. HRMS (EI)  $m/z$  calcd for  $\text{C}_{21}\text{H}_{15}\text{NO}_2$ : 313.1103; found: 313.1098.

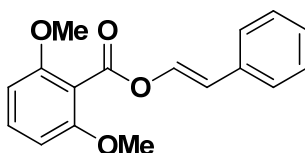

**(E)-styryl 2,6-dimethoxybenzoate (6s).** Colorless solid (53 mg, 95% yield).  $^1\text{H-NMR}$  (400 MHz,  $\text{CDCl}_3$ )  $\delta$  3.83 (s, 6H), 6.47 (d, 1H,  $J=12.8$  Hz), 6.58 (d, 2H,  $J=8.4$  Hz), 7.21-7.37 (m, 6H), 8.08 (d, 1H,  $J=12.8$  Hz).  $^{13}\text{C-NMR}$ (100 MHz,  $\text{CDCl}_3$ )  $\delta$  56.12, 104.03, 111.85, 115.79, 126.32, 127.39, 128.72, 131.84, 134.32, 136.87, 157.82, 163.61.

HRMS (EI)  $m/z$  calcd for  $\text{C}_{17}\text{H}_{16}\text{O}_4$ : 284.1049; found: 284.1041.

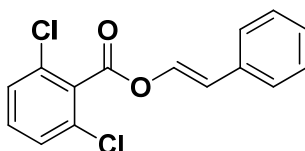

**(E)-styryl 2,6-dichlorobenzoate (6t).** Colorless solid (21 mg, 36% yield).  $^1\text{H-NMR}$  (400 MHz,  $\text{CDCl}_3$ )  $\delta$  6.50 (d, 1H,  $J=12.8$  Hz), 7.18-7.33 (m, 8H), 7.98 (d, 1H,  $J=12.4$  Hz).  $^{13}\text{C-NMR}$ (100 MHz,  $\text{CDCl}_3$ )  $\delta$  116.35, 125.46, 126.84, 126.99, 127.77, 130.42, 131.34, 132.52, 135.08, 160.83.

HRMS (EI)  $m/z$  calcd for  $\text{C}_{15}\text{H}_{10}\text{Cl}_2\text{O}_2$ : 292.0058; found: 292.0054

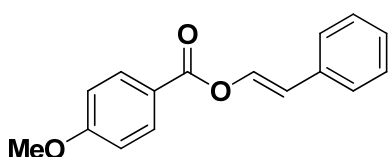

**(E)-styryl 4-methoxybenzoate (6u).** Yellow solid (31 mg, 62% yield).  $^1\text{H-NMR}$  (400 MHz,  $\text{CDCl}_3$ )

$\delta$  3.88 (s, 3H), 6.55 (d, 1H,  $J=12.8$  Hz), 6.96 (d, 2H,  $J=8.8$  Hz), 7.22-7.26 (m, 1H), 7.30-7.40 (m, 4H), 8.06-8.12 (m, 3H).  $^{13}\text{C}$ -NMR(100 MHz,  $\text{CDCl}_3$ )  $\delta$  55.51, 113.92, 115.39, 121.20, 126.26, 127.37, 128.75, 132.19, 134.40, 136.67, 163.40, 164.02.

HRMS (EI)  $m/z$  calcd for  $\text{C}_{16}\text{H}_{14}\text{O}_3$ : 254.2806; found: 254.2802



## Spectra Data ( $^1\text{H}$ , $^{13}\text{C}$ , $^{19}\text{F}$ ) of all products

### 2,4,6-trimethoxybiphenyl (3a).

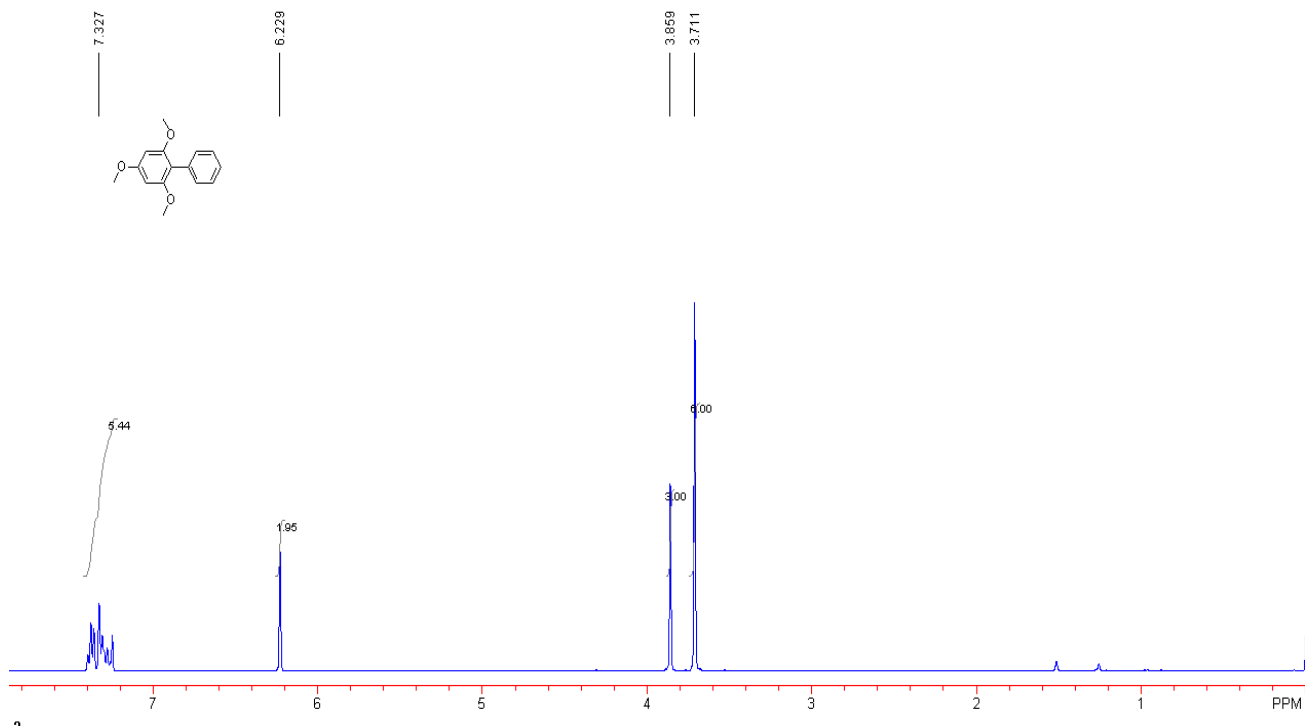

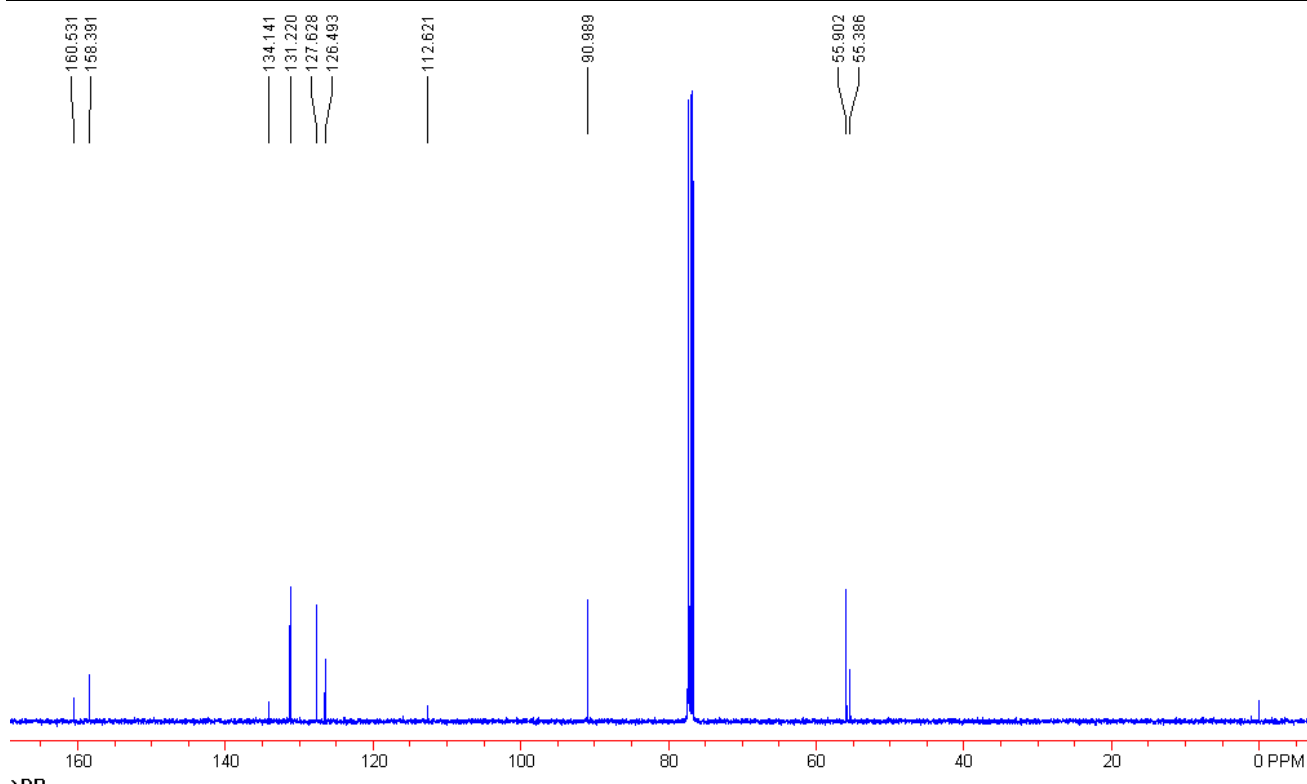

**2,4,6-trimethoxy-4'-methylbiphenyl (3b).**

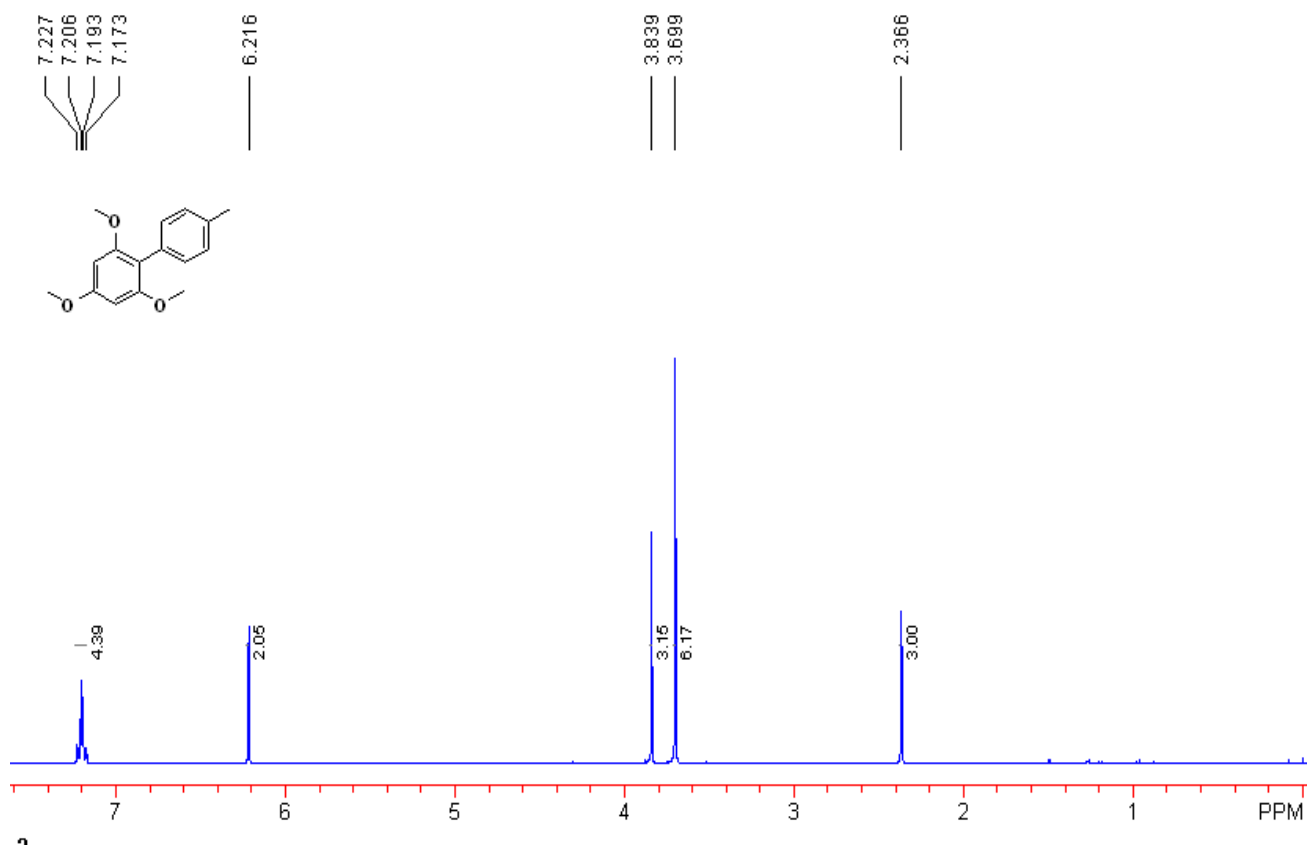

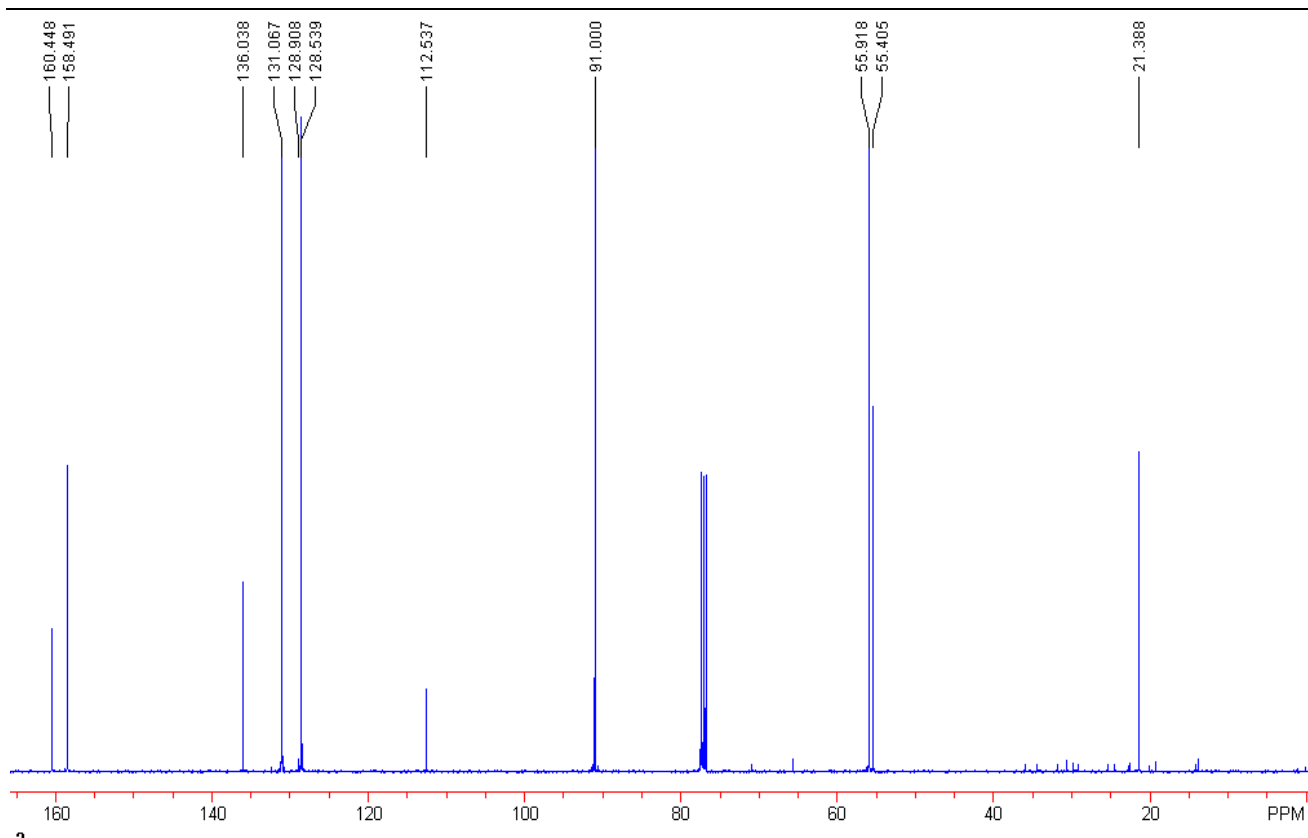

**4'-bromo-2,4,6-trimethoxybiphenyl (3c).**

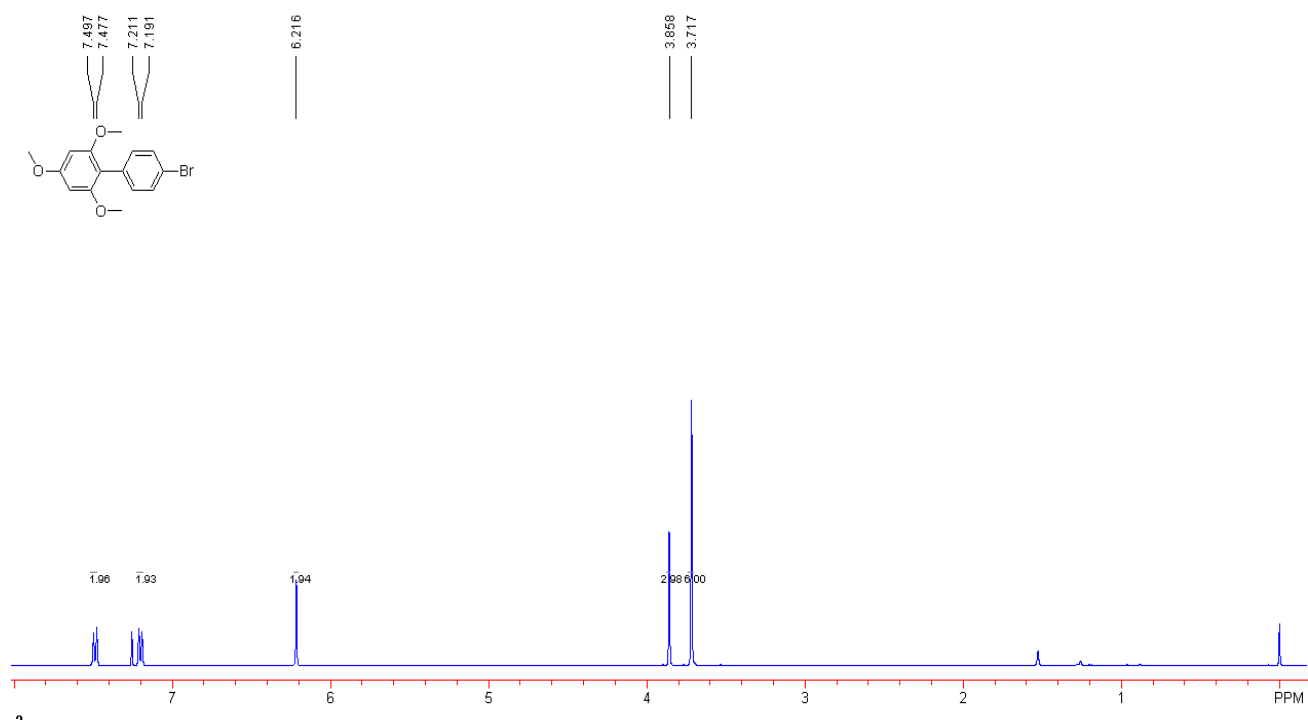

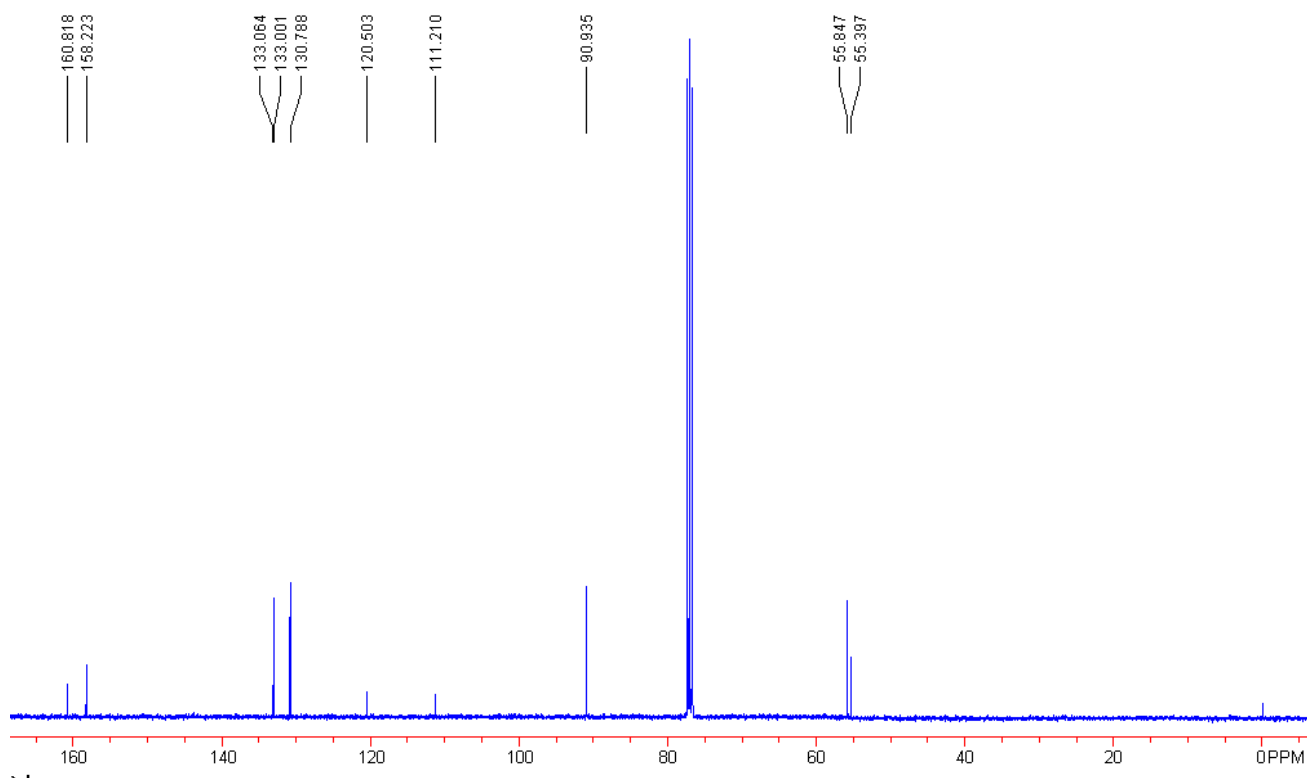

### 4'-phenyl-2,4,6-trimethoxybiphenyl (3d).

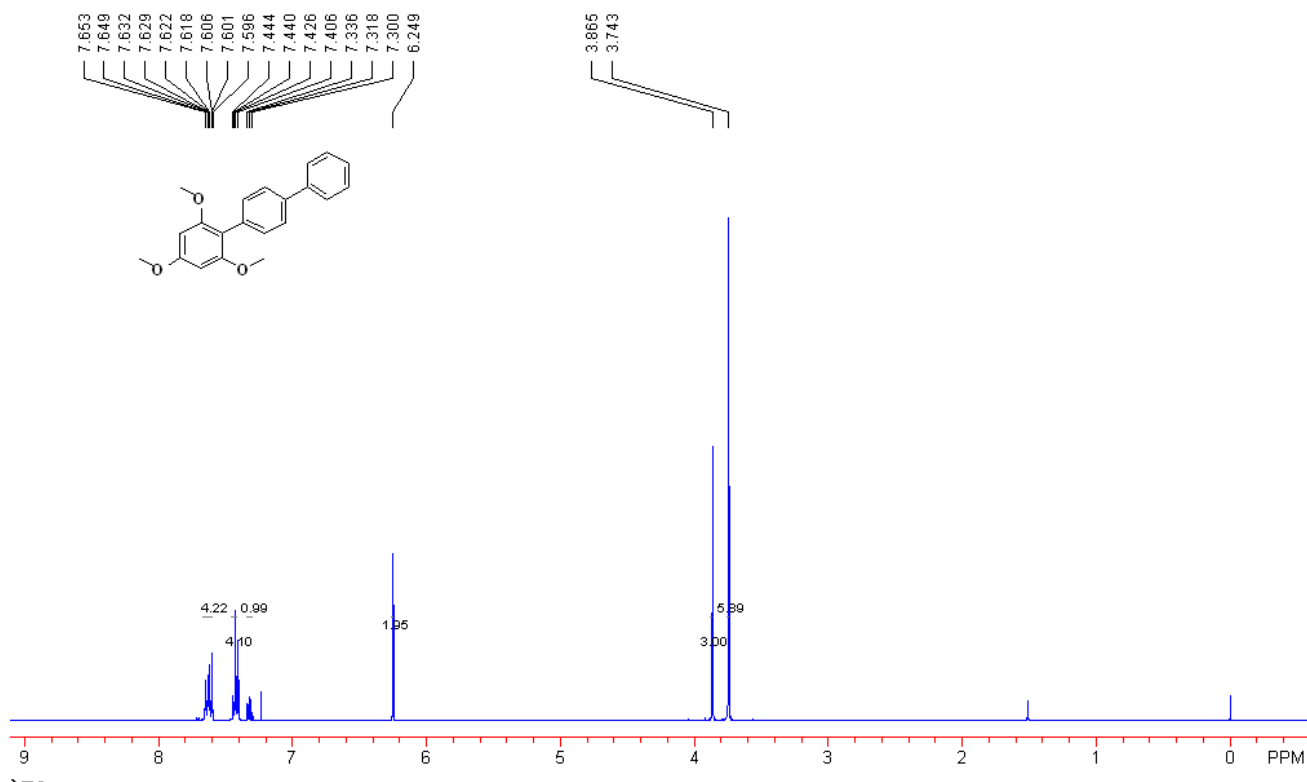

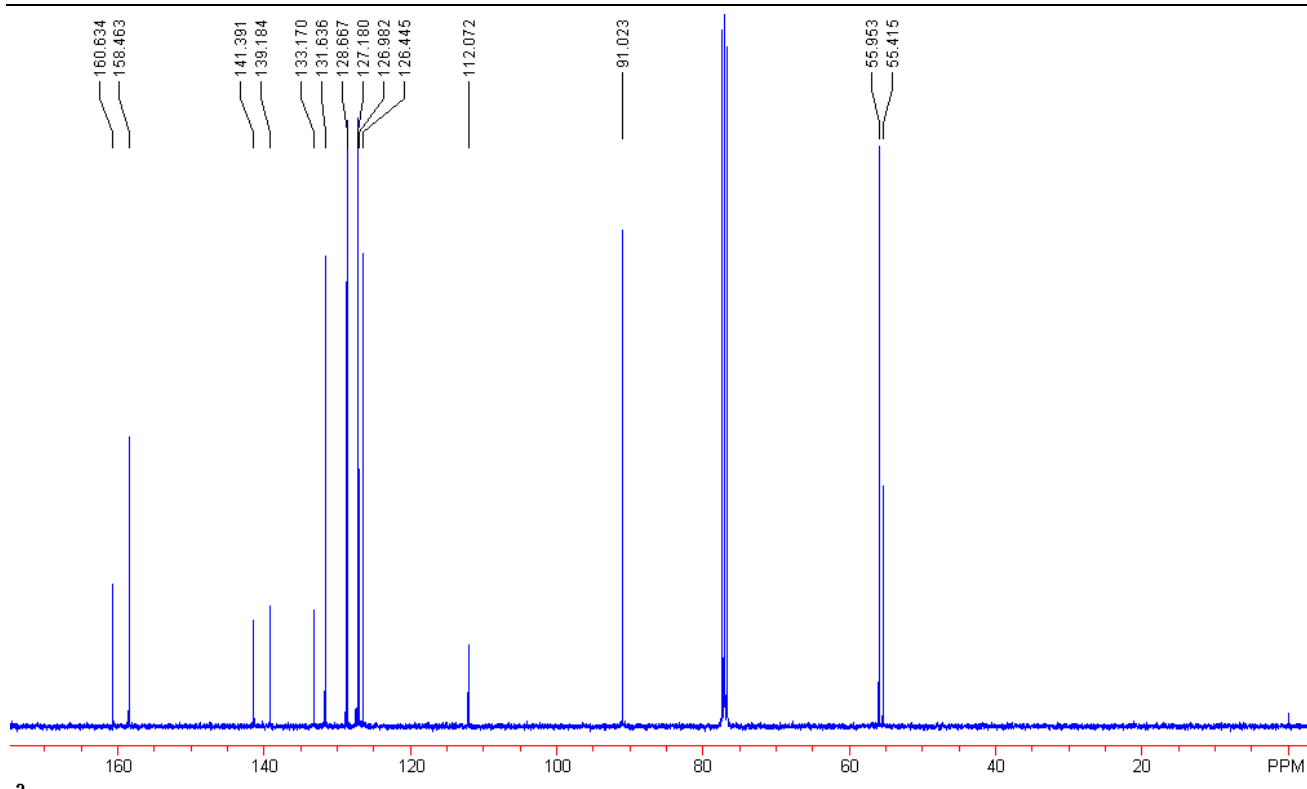

**2,4,6-trimethoxy-4'-(trifluoromethyl)biphenyl (3e).**

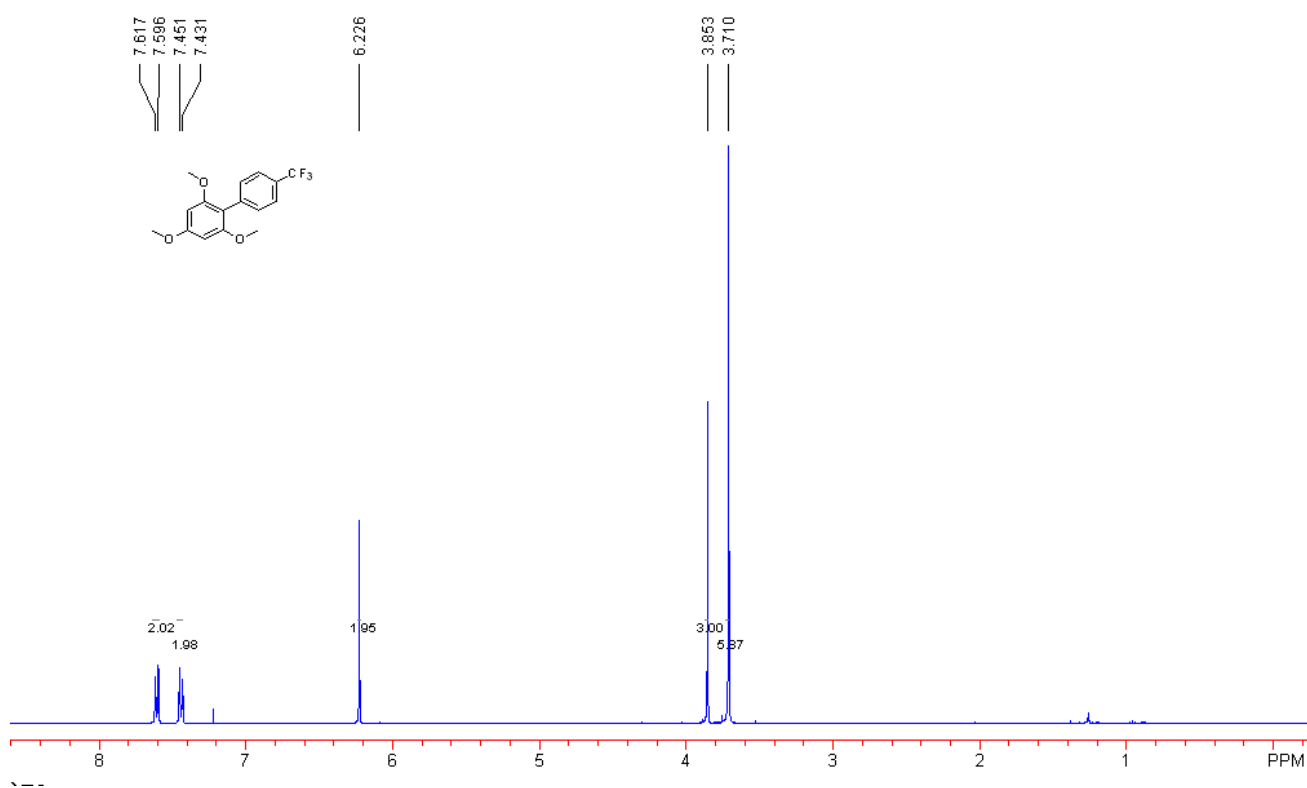

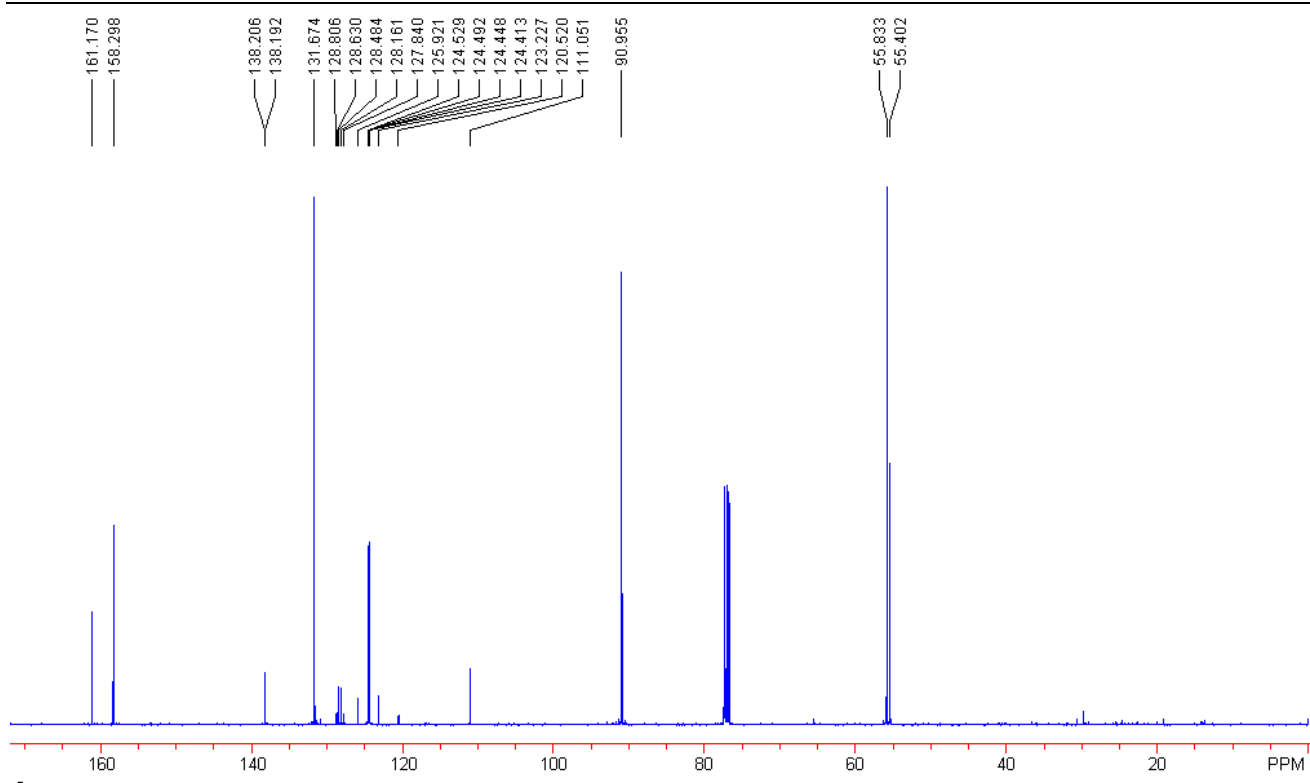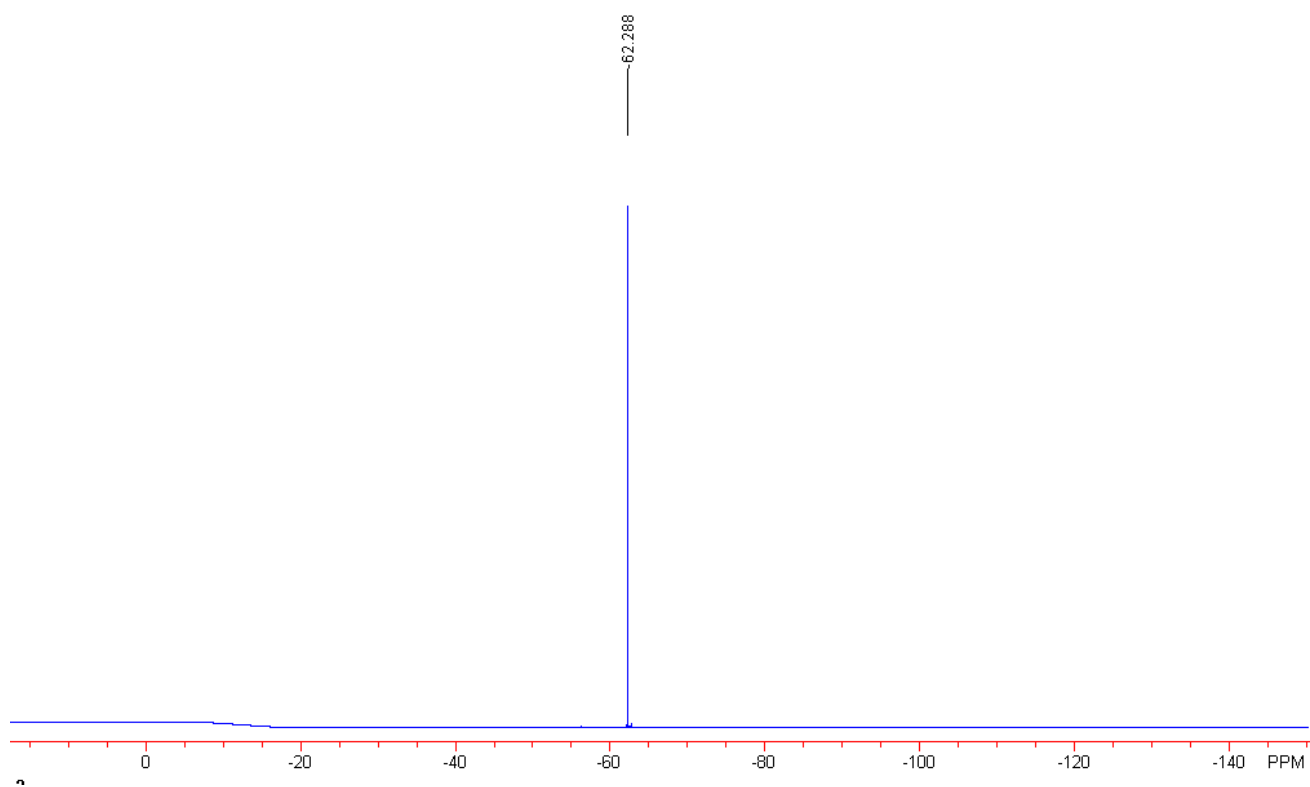

**2,4,4',6-tetramethoxybiphenyl (3f).**

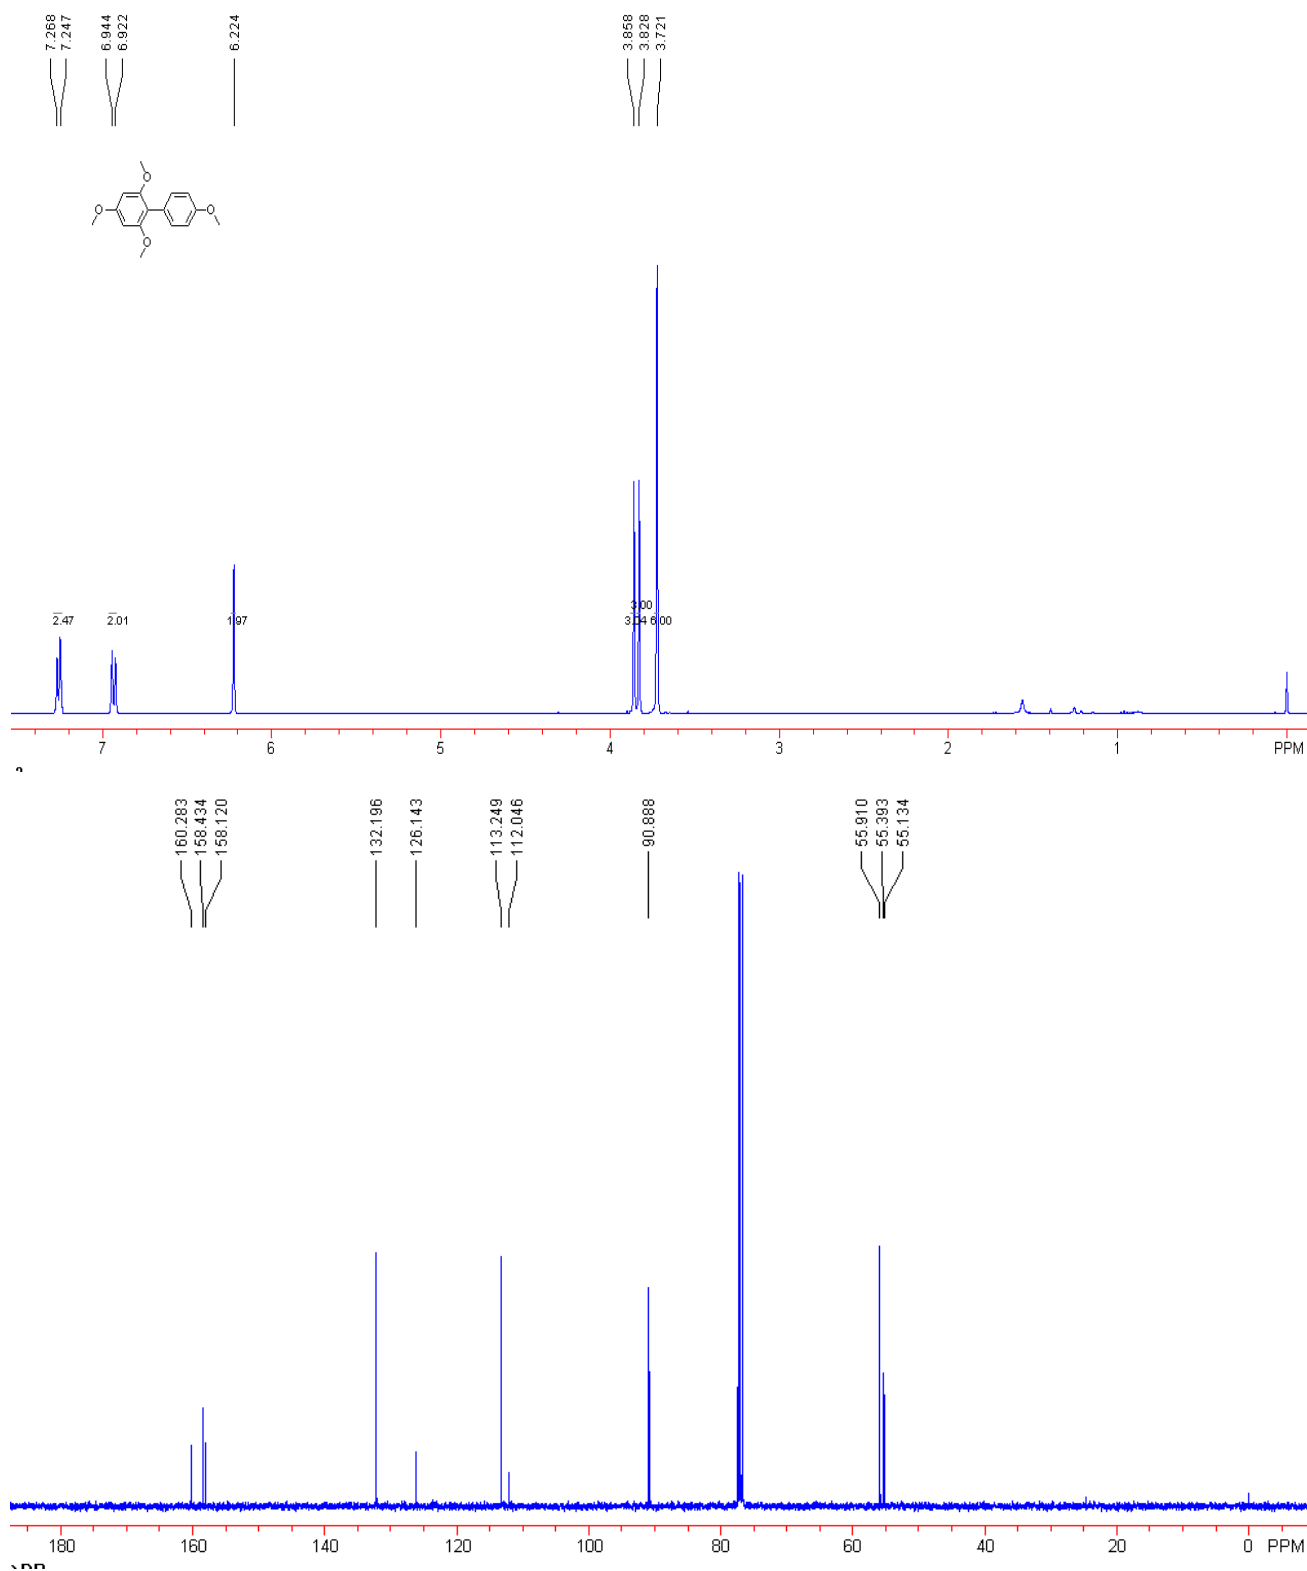

**1-(2',4',6'-trimethoxybiphenyl-4-yl)ethanone (3g).**

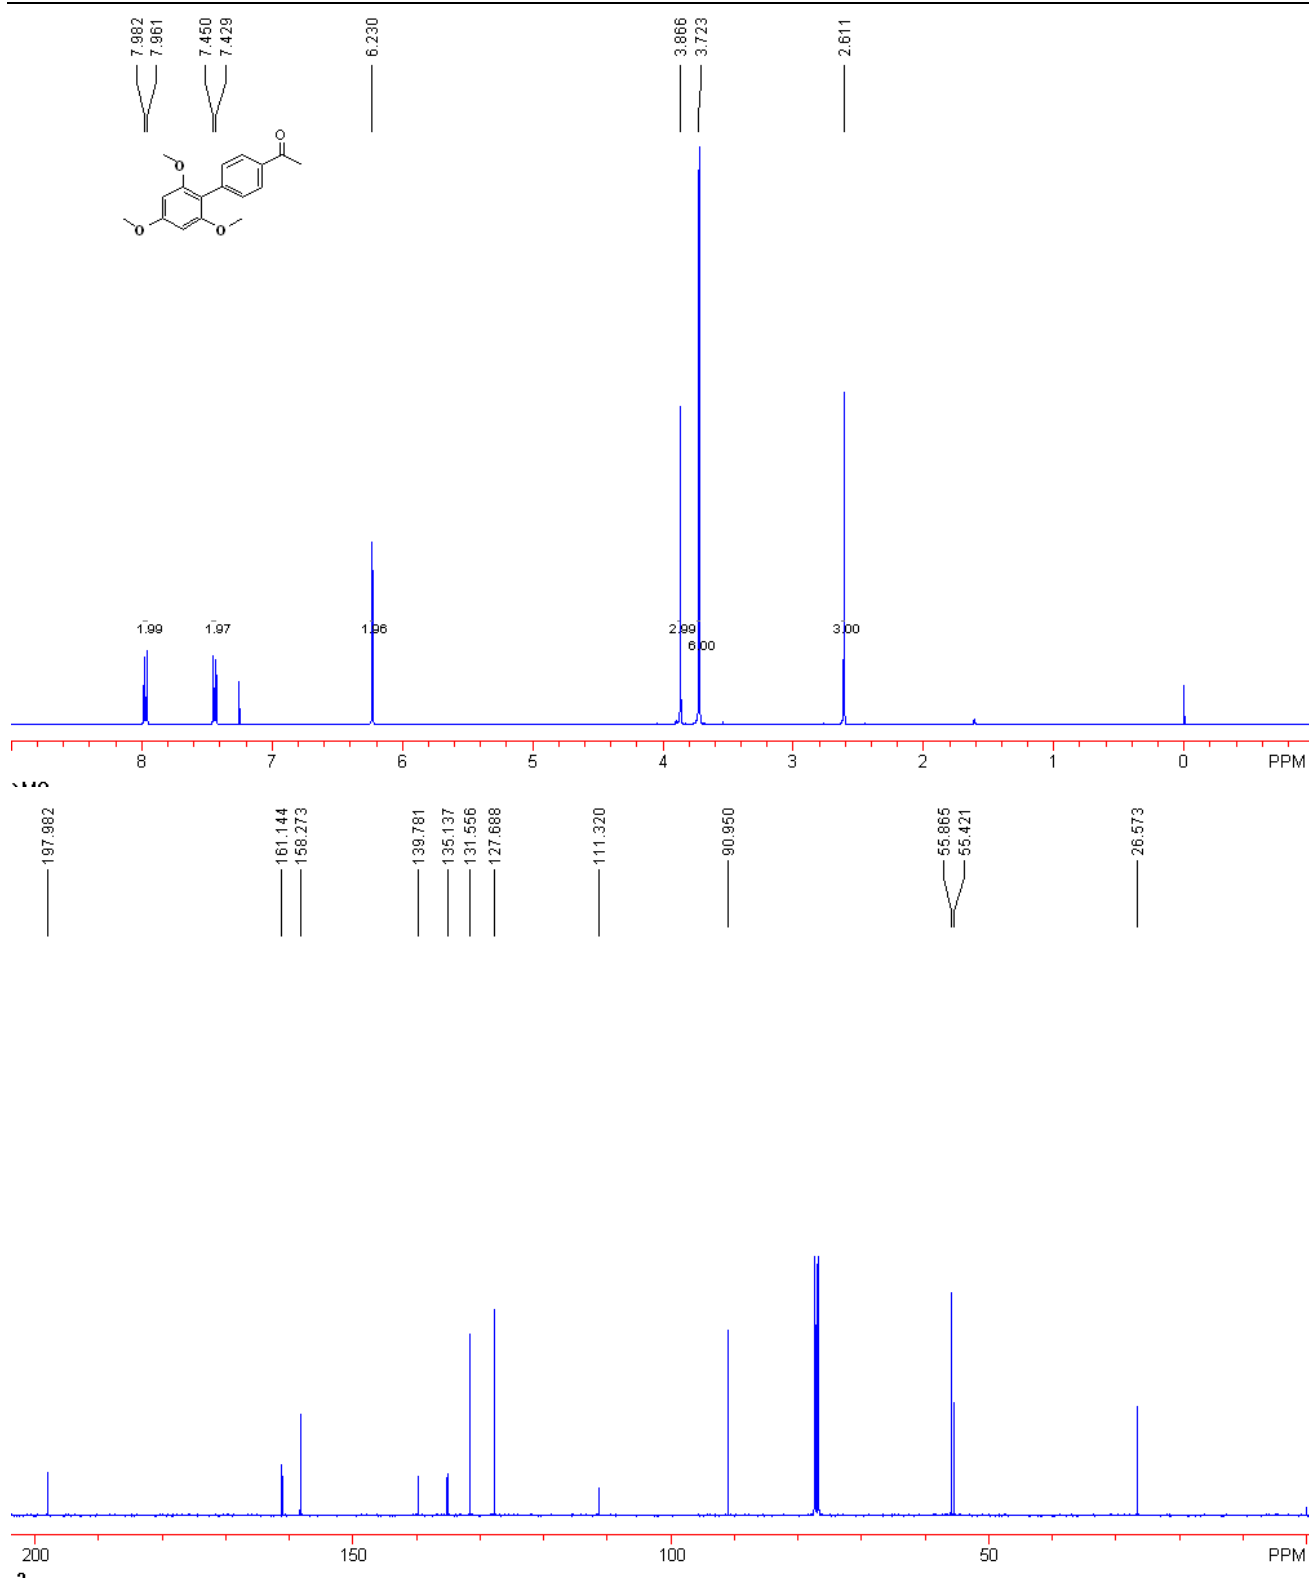

**2-(2,4,6-trimethoxyphenyl)naphthalene (3h).**



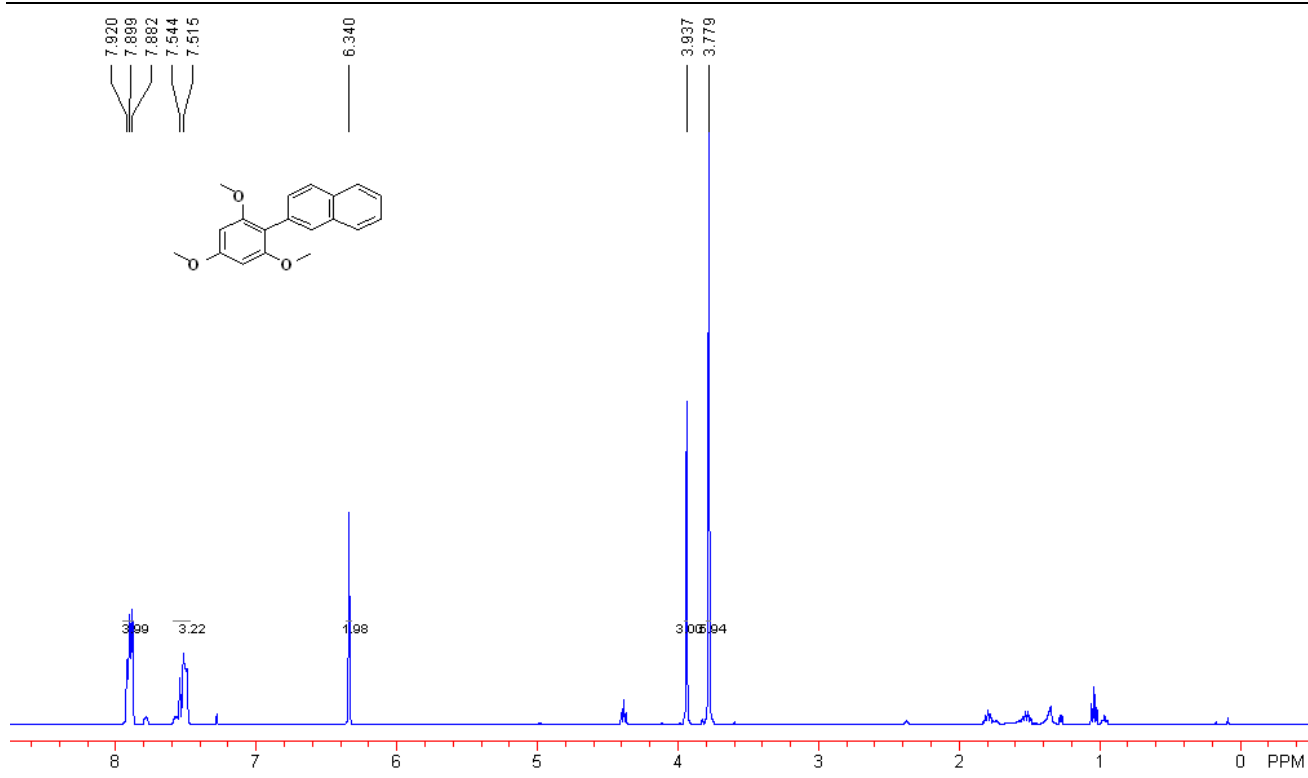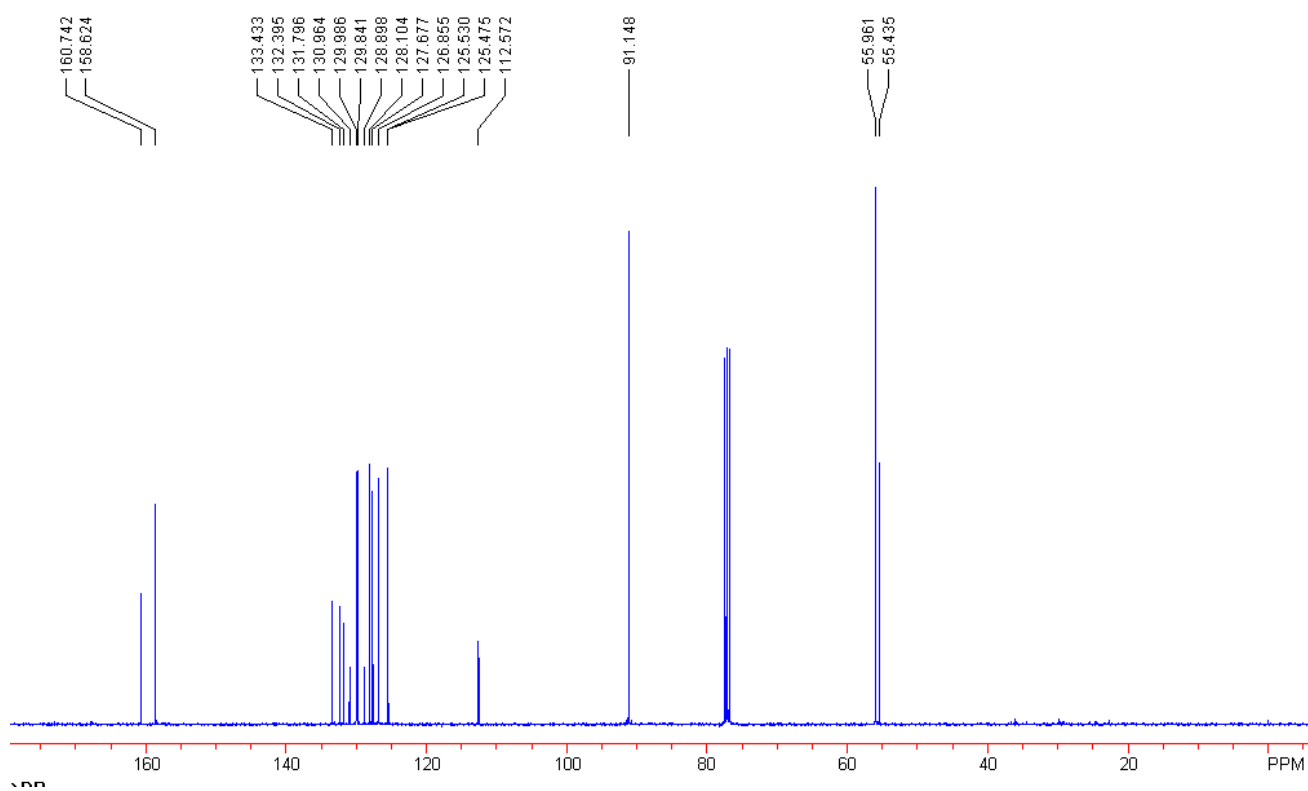

**2',4',6'-trimethoxybiphenyl-4-carbonitrile(3i).**

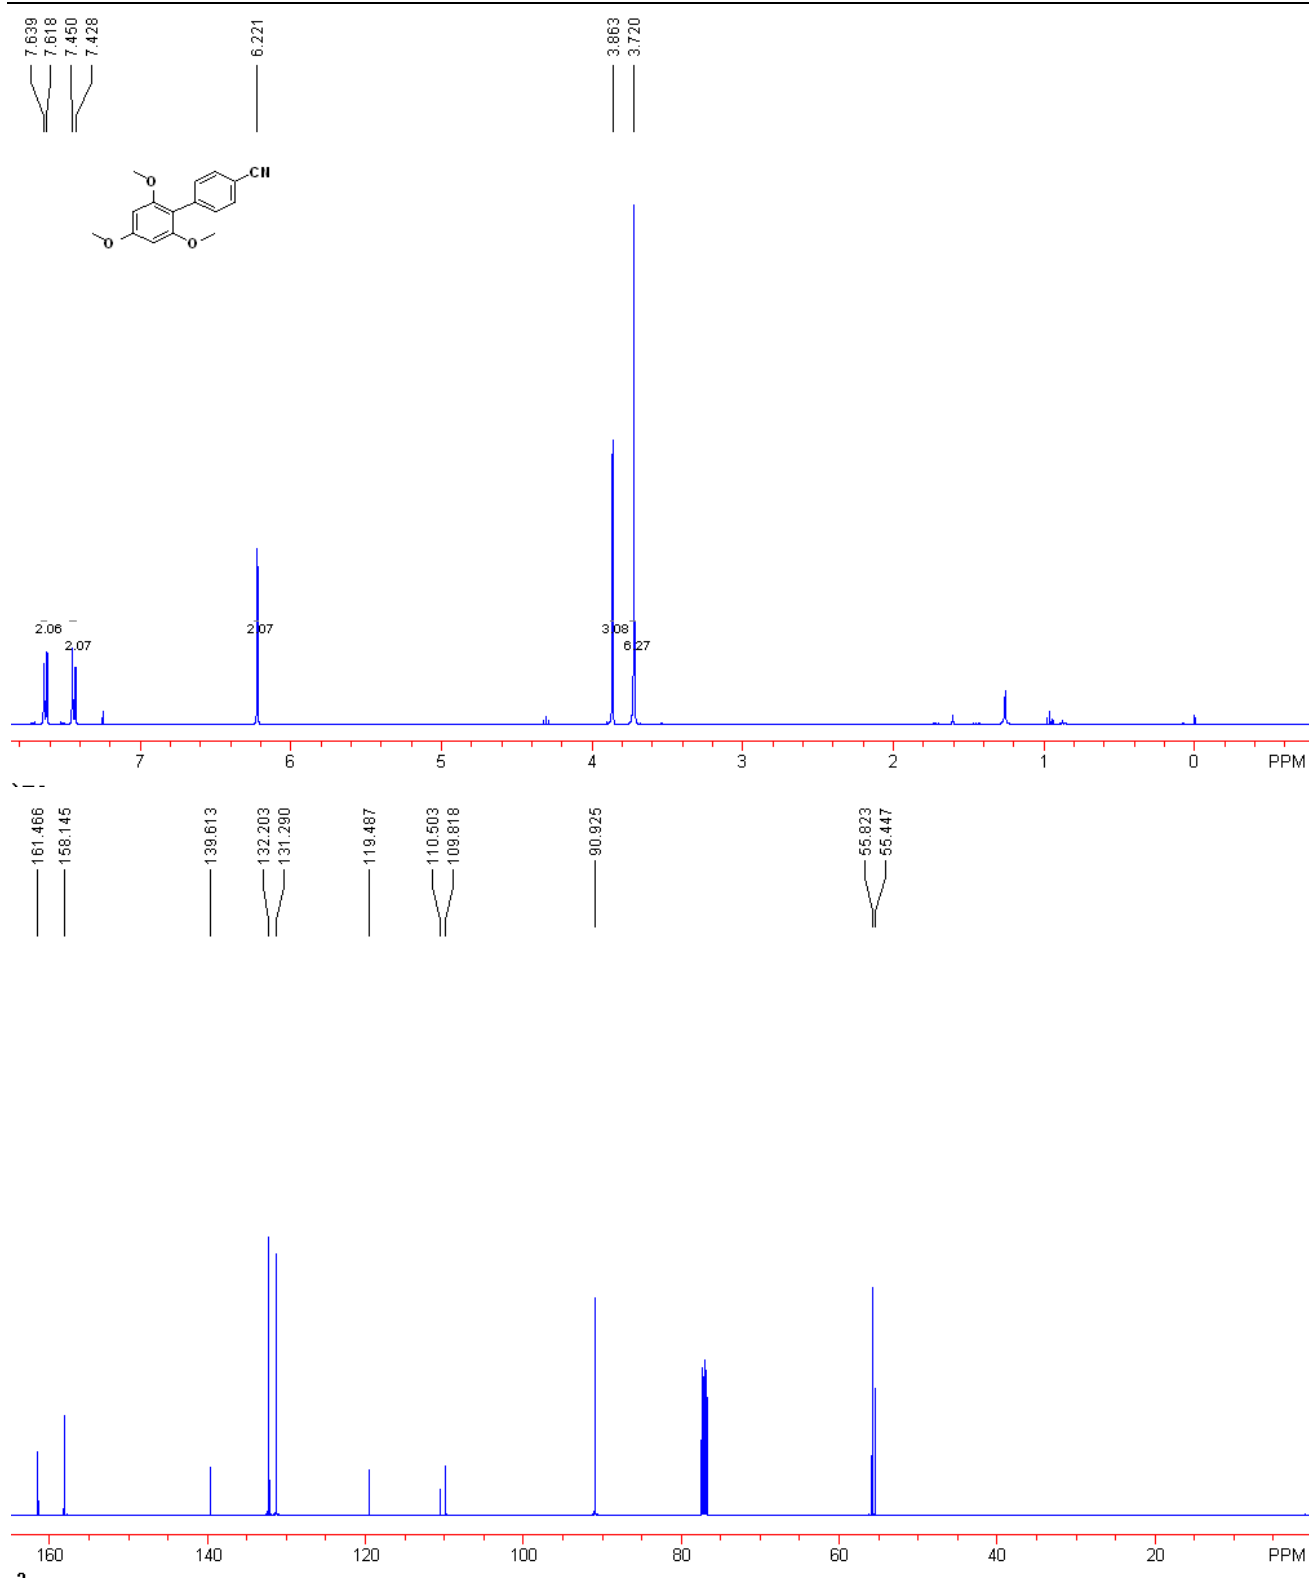

**Ethyl 2',4',6'-trimethoxybiphenyl-4-carboxylate (3j).**

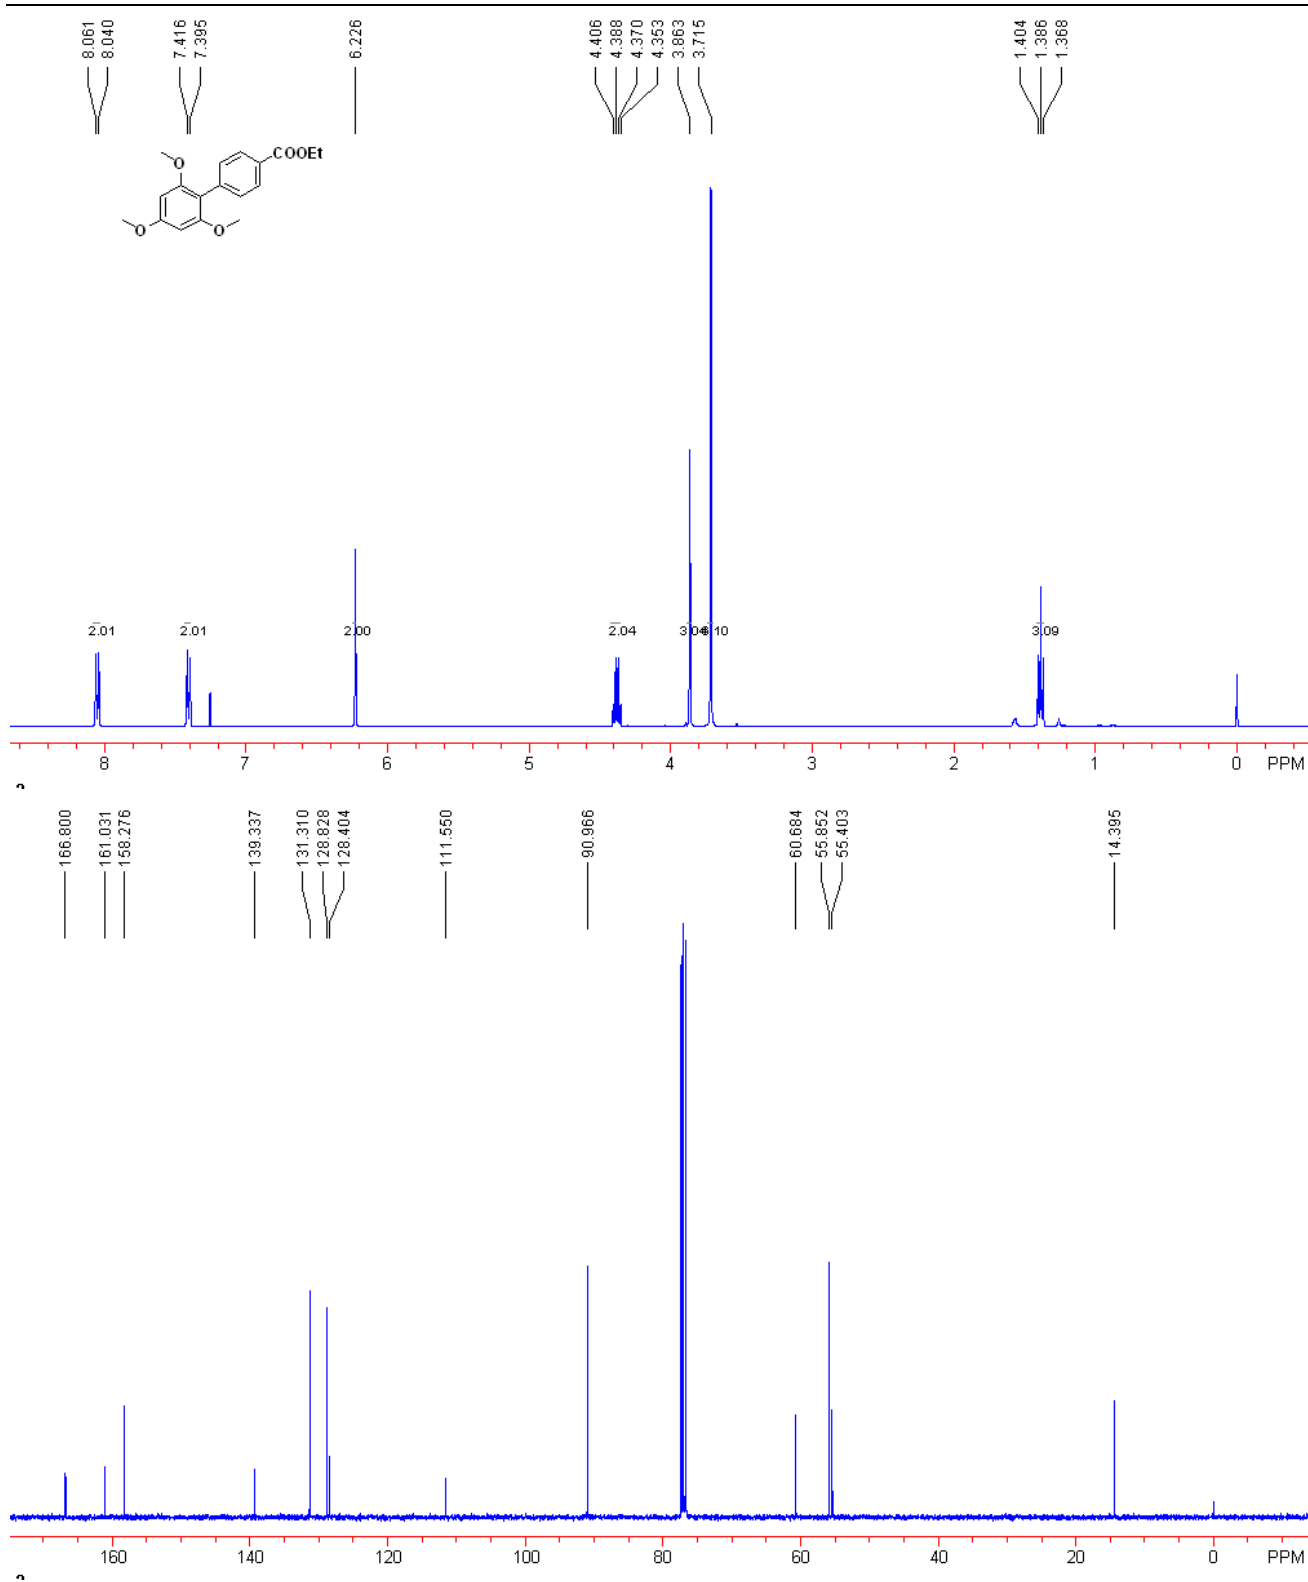

**3'-chloro-2,4,6-trimethoxybiphenyl(3k).**

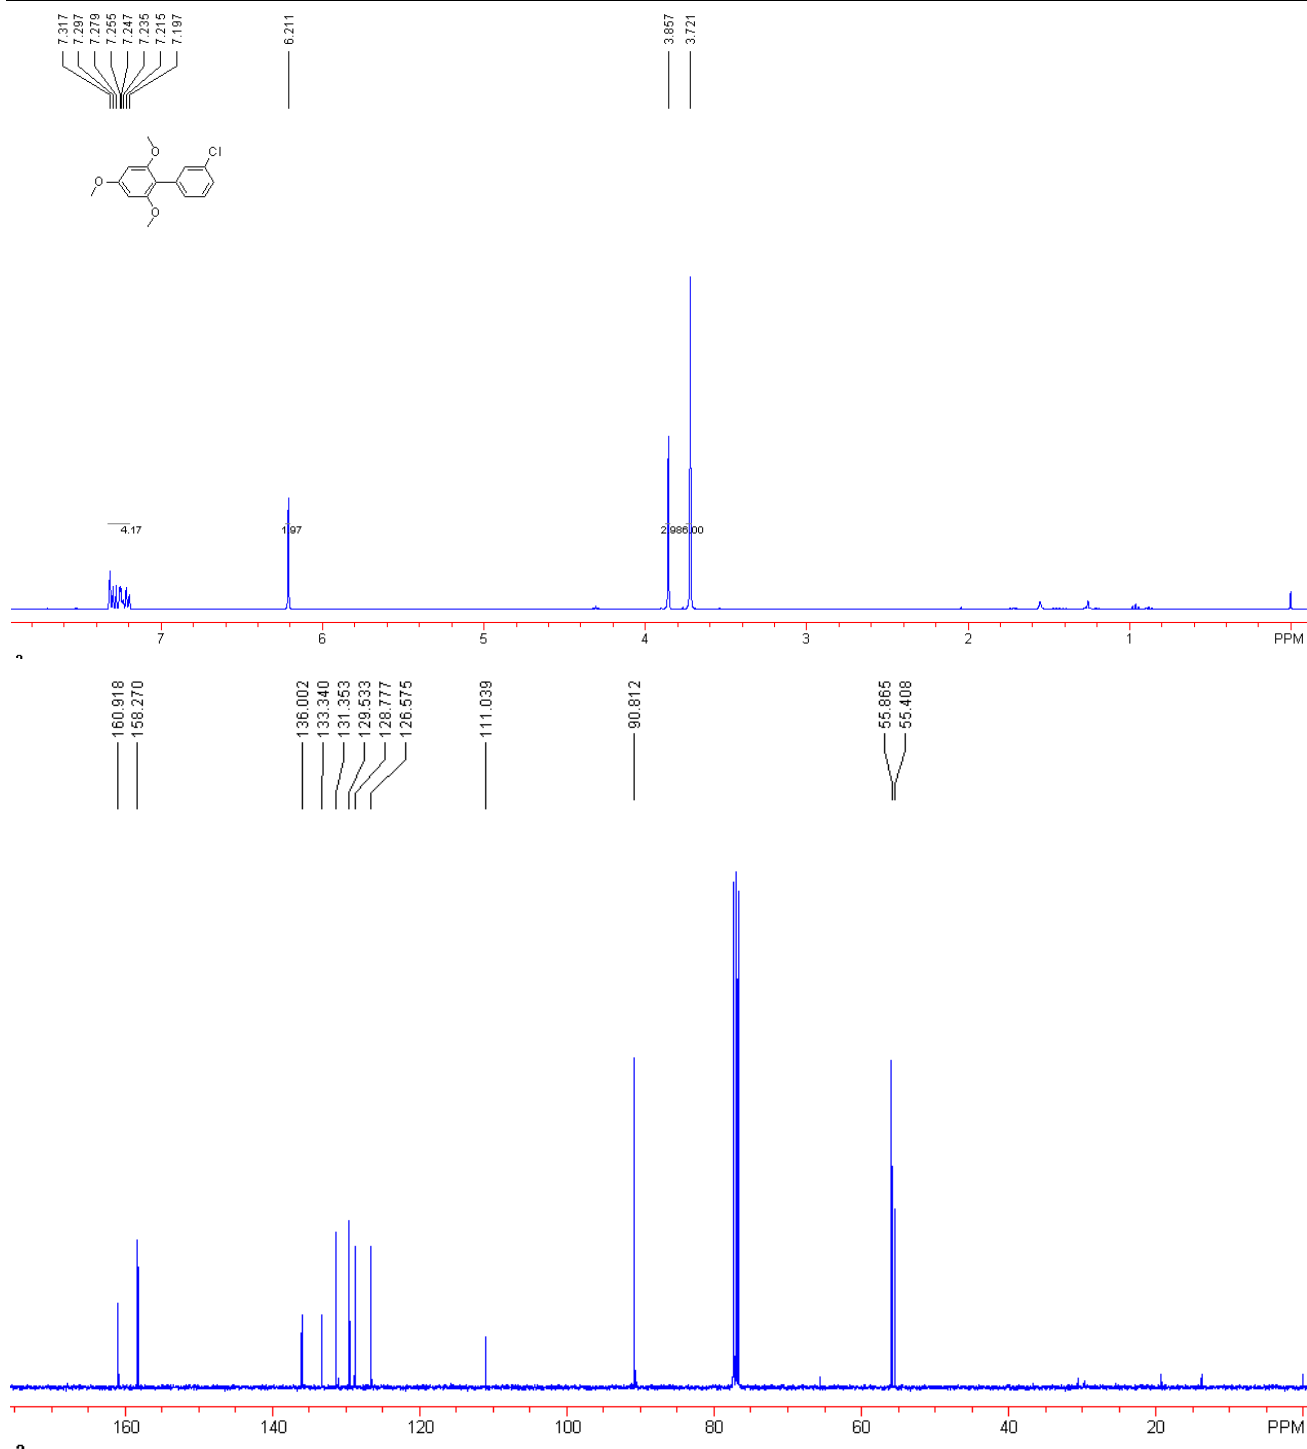

**3'-fluoro-2,4,6-trimethoxybiphenyl (31).**

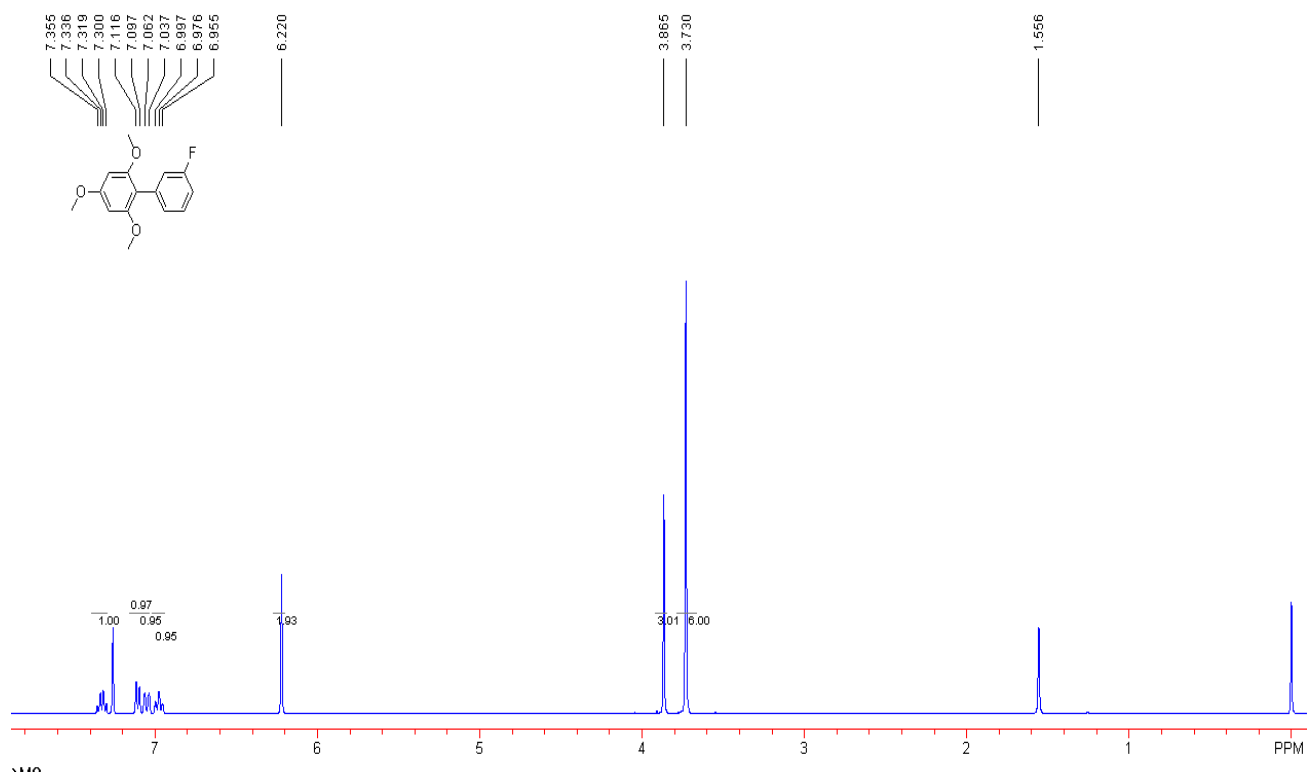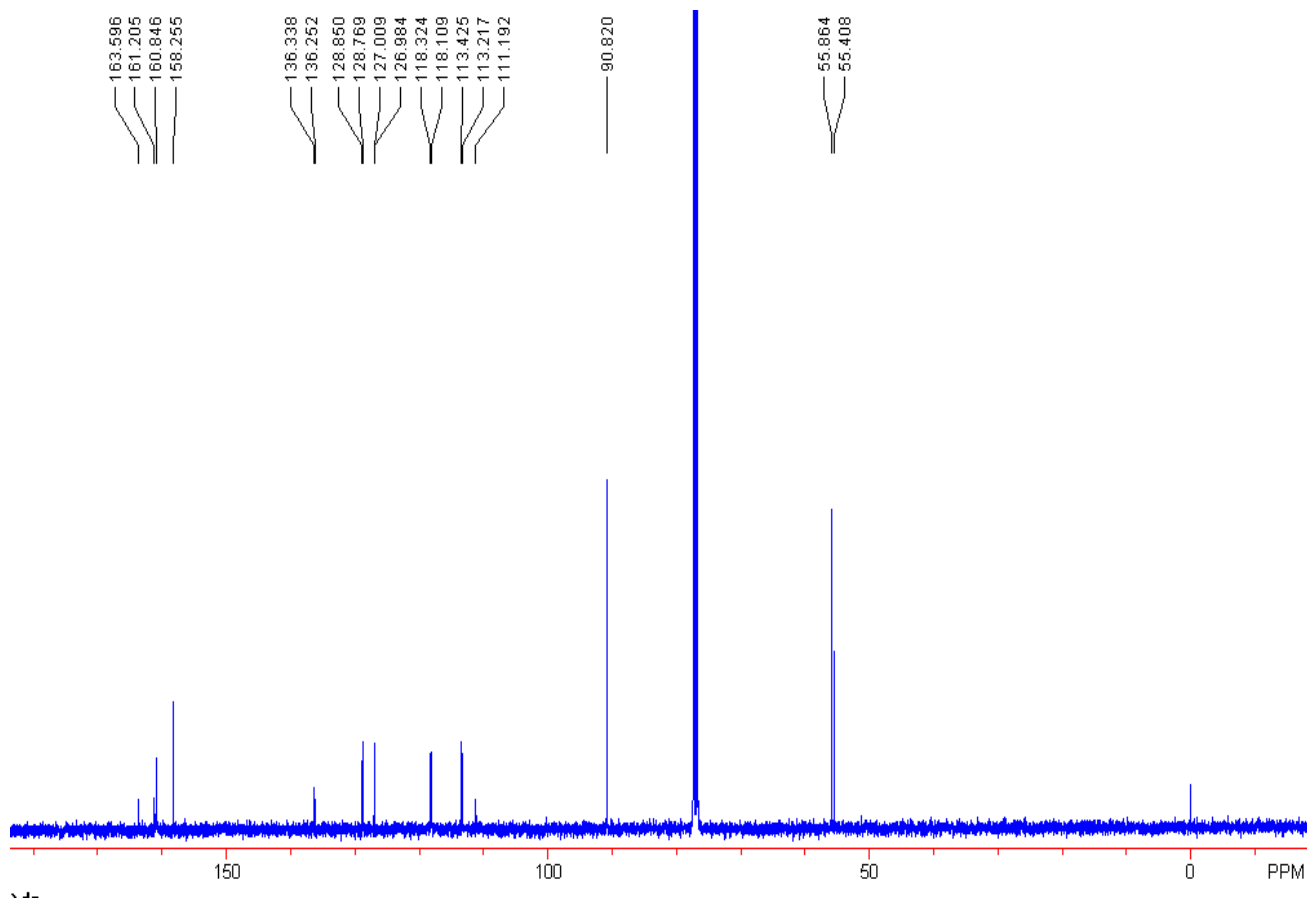

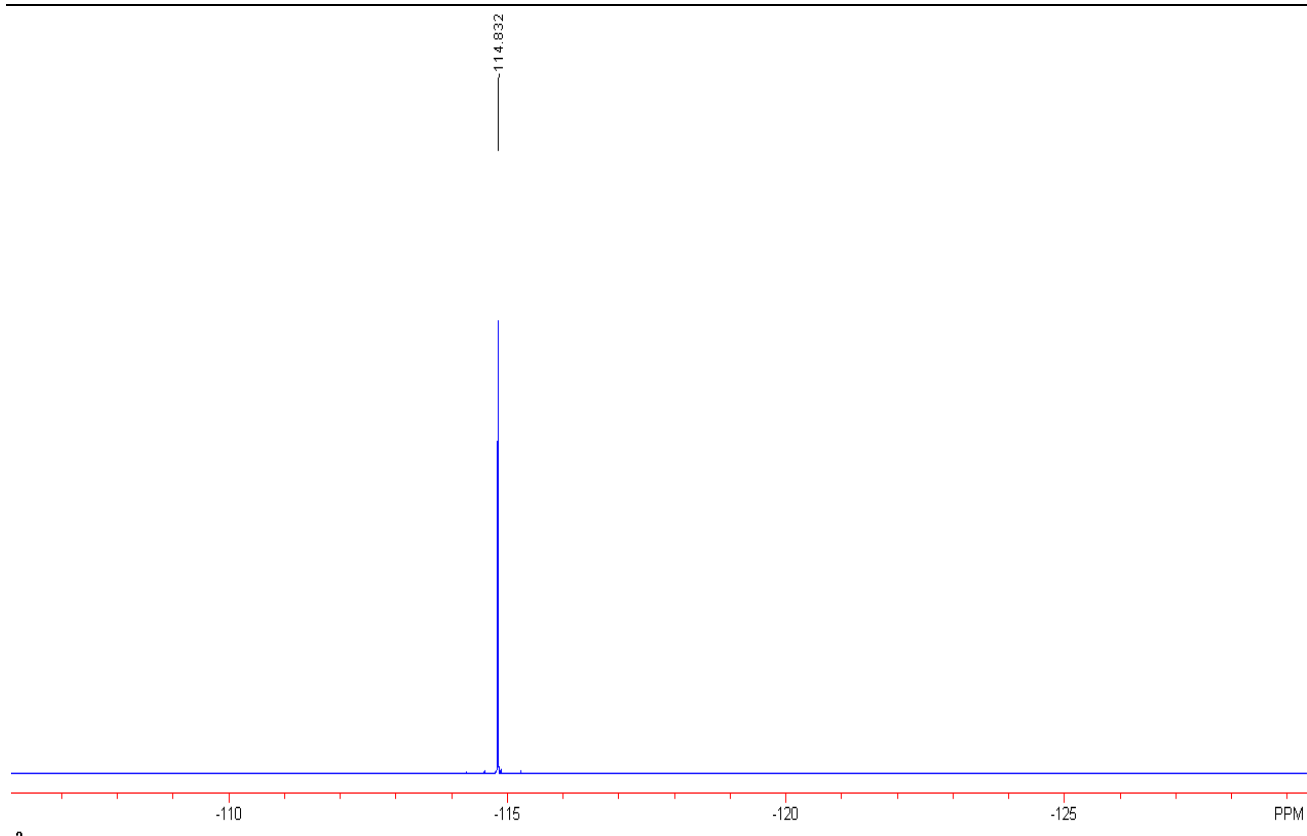

**2,3',4,6-tetramethoxybiphenyl (3m).**

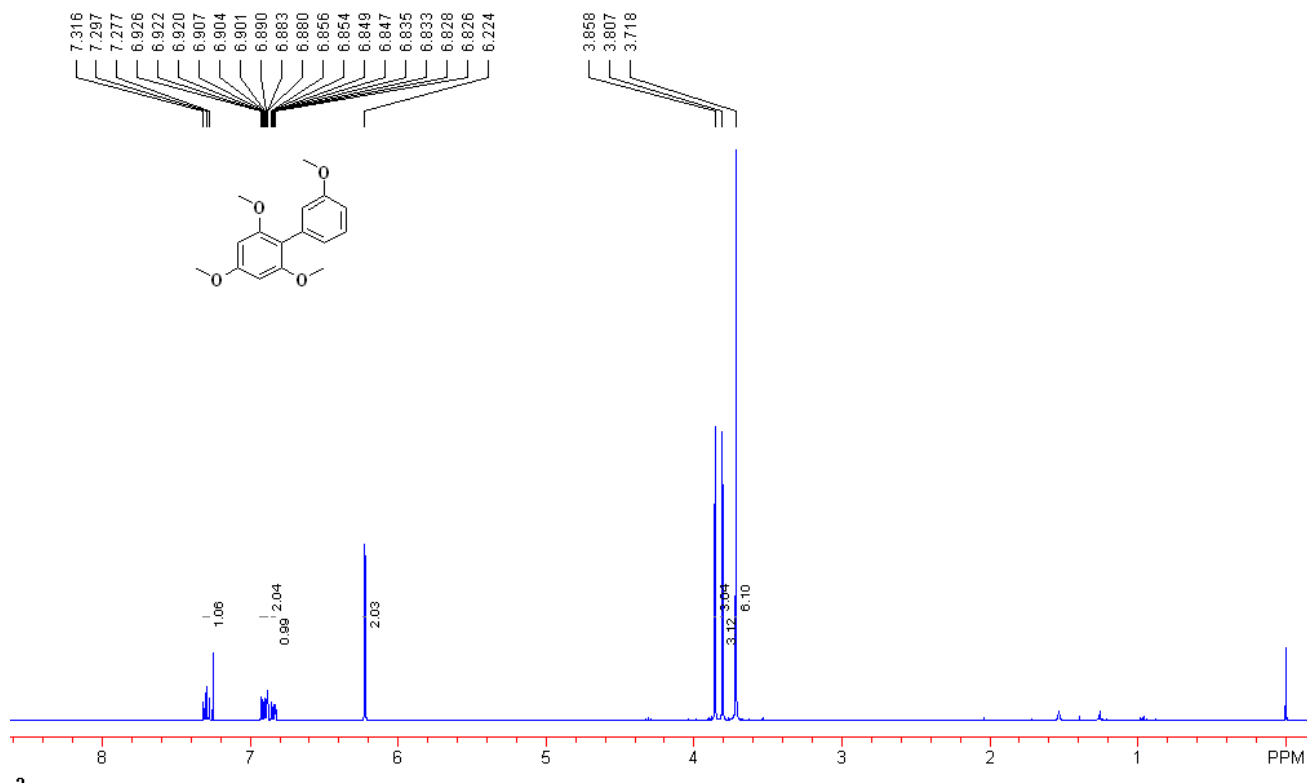

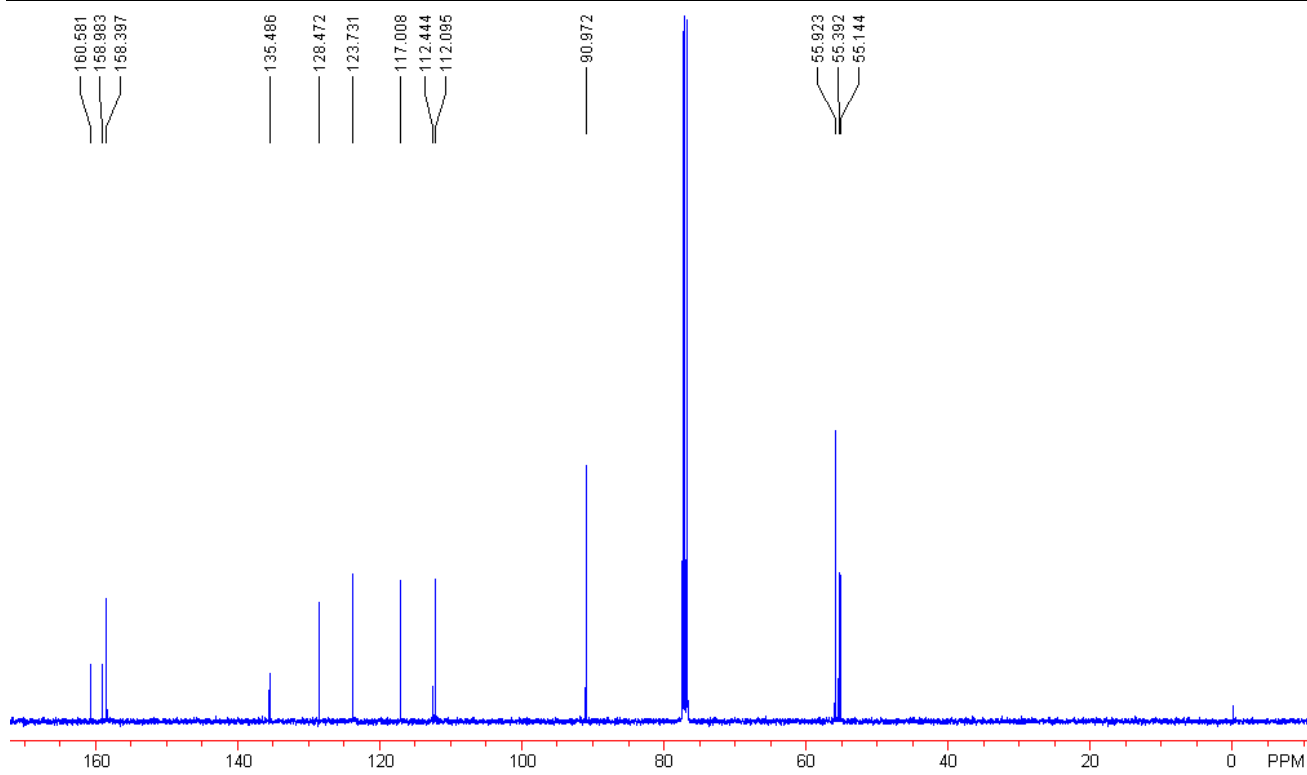

**5-(2,4,6-trimethoxyphenyl)benzo[d][1,3]dioxole (3n).**

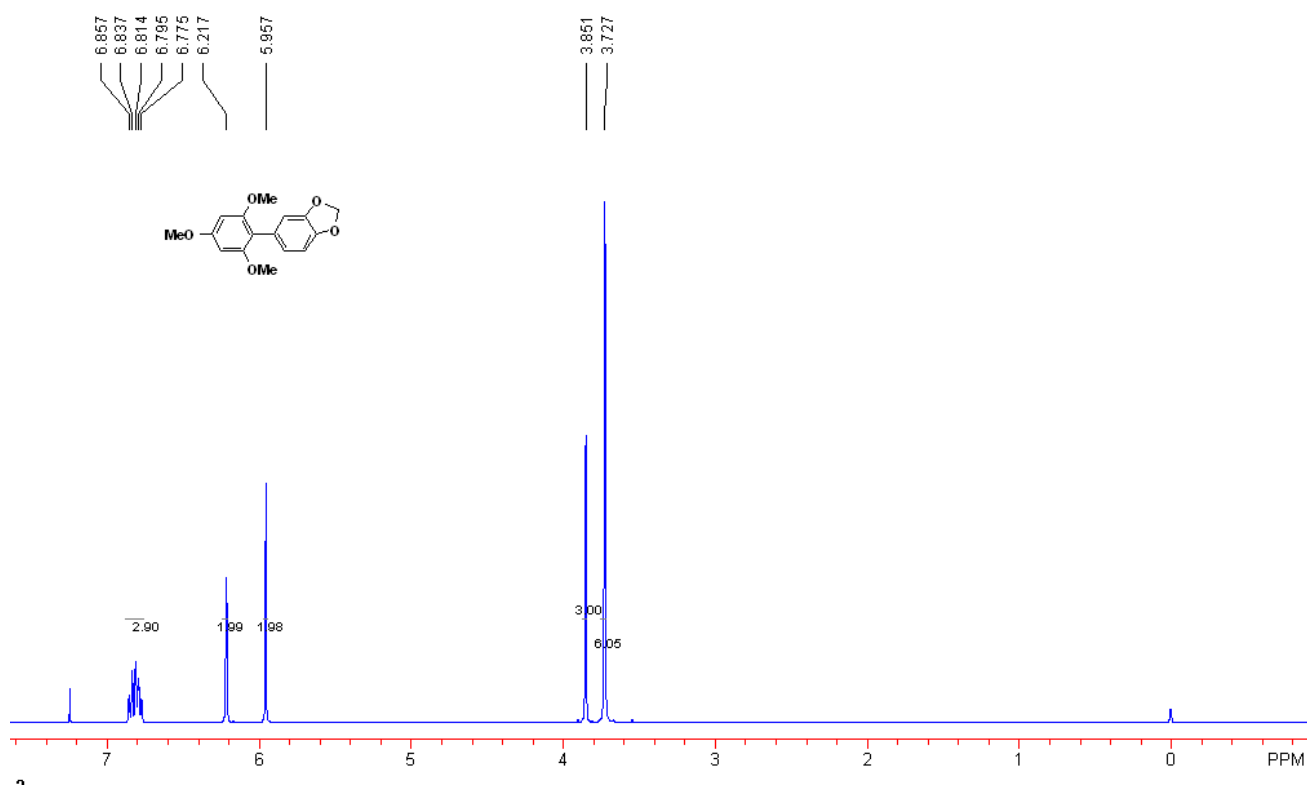

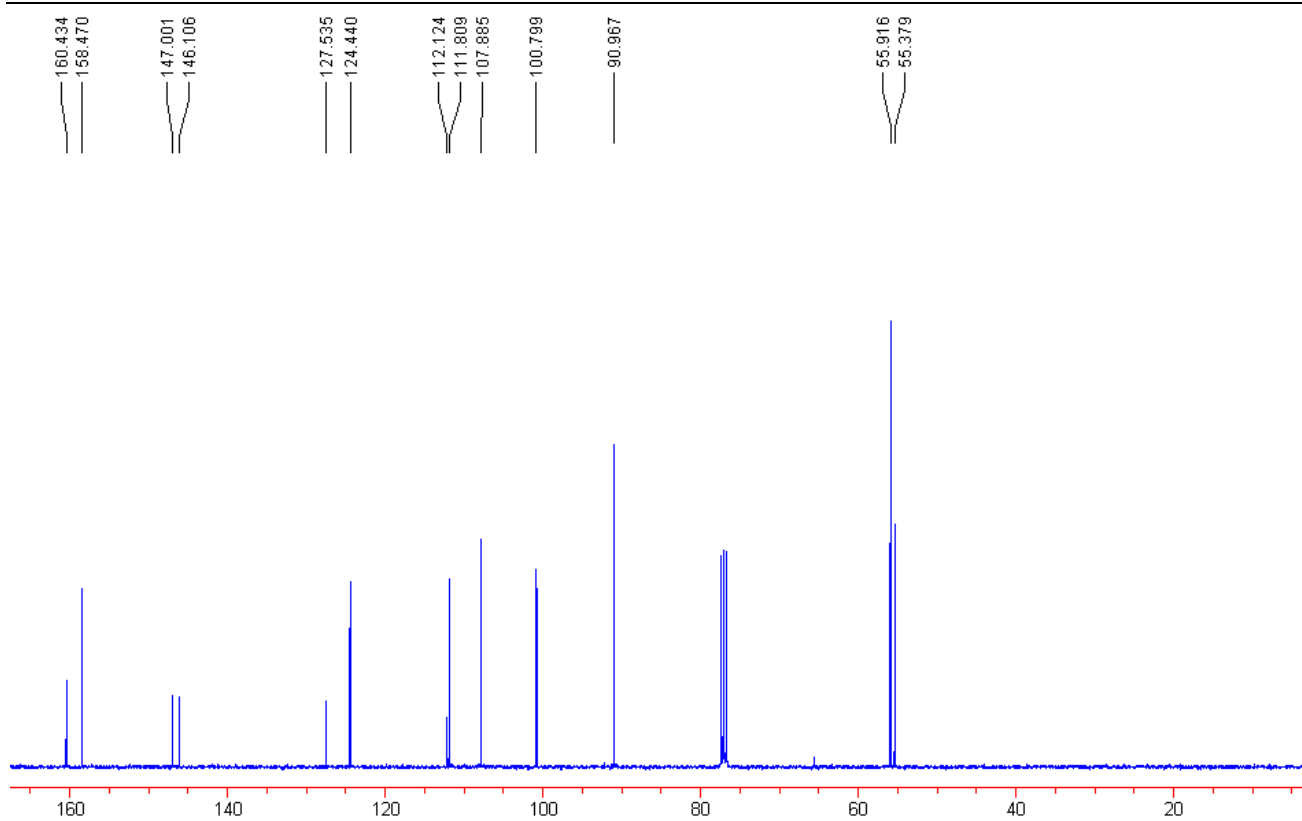

**2,4,6-trimethoxy-2'-methylbiphenyl (3o).**

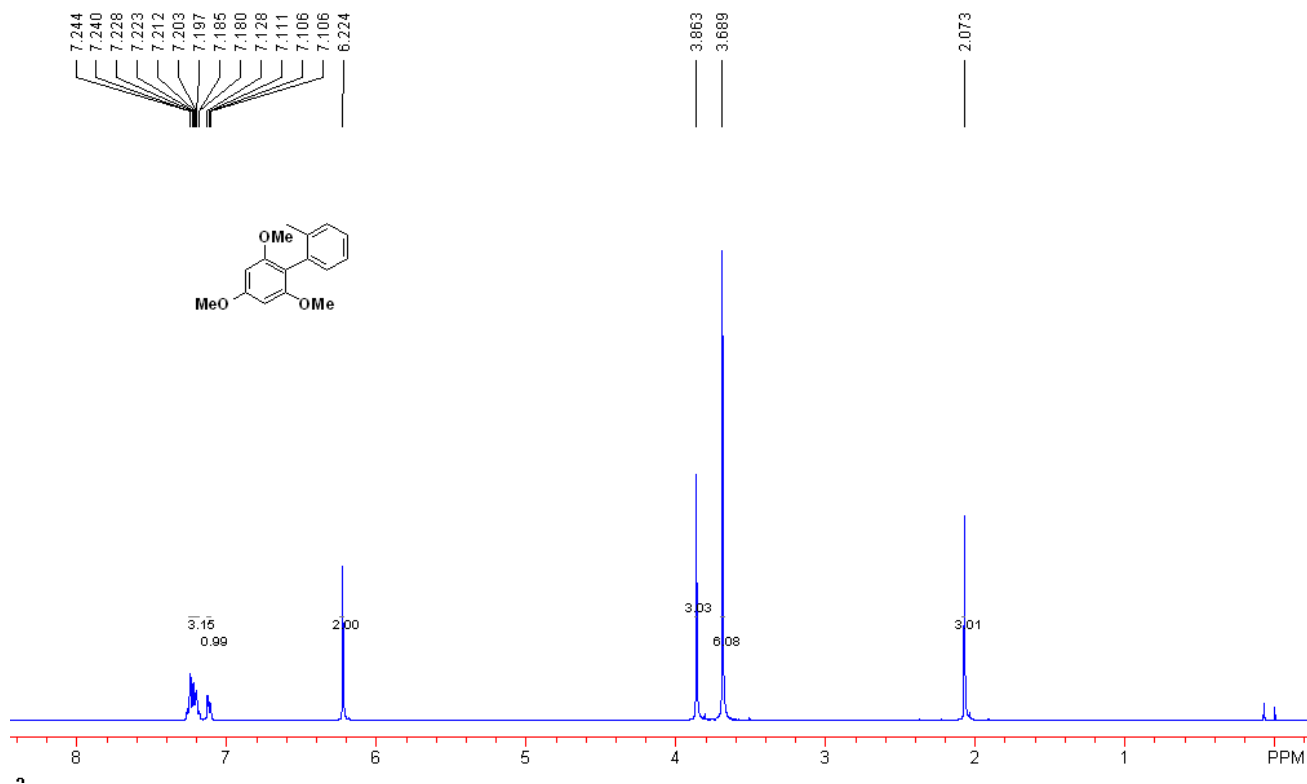



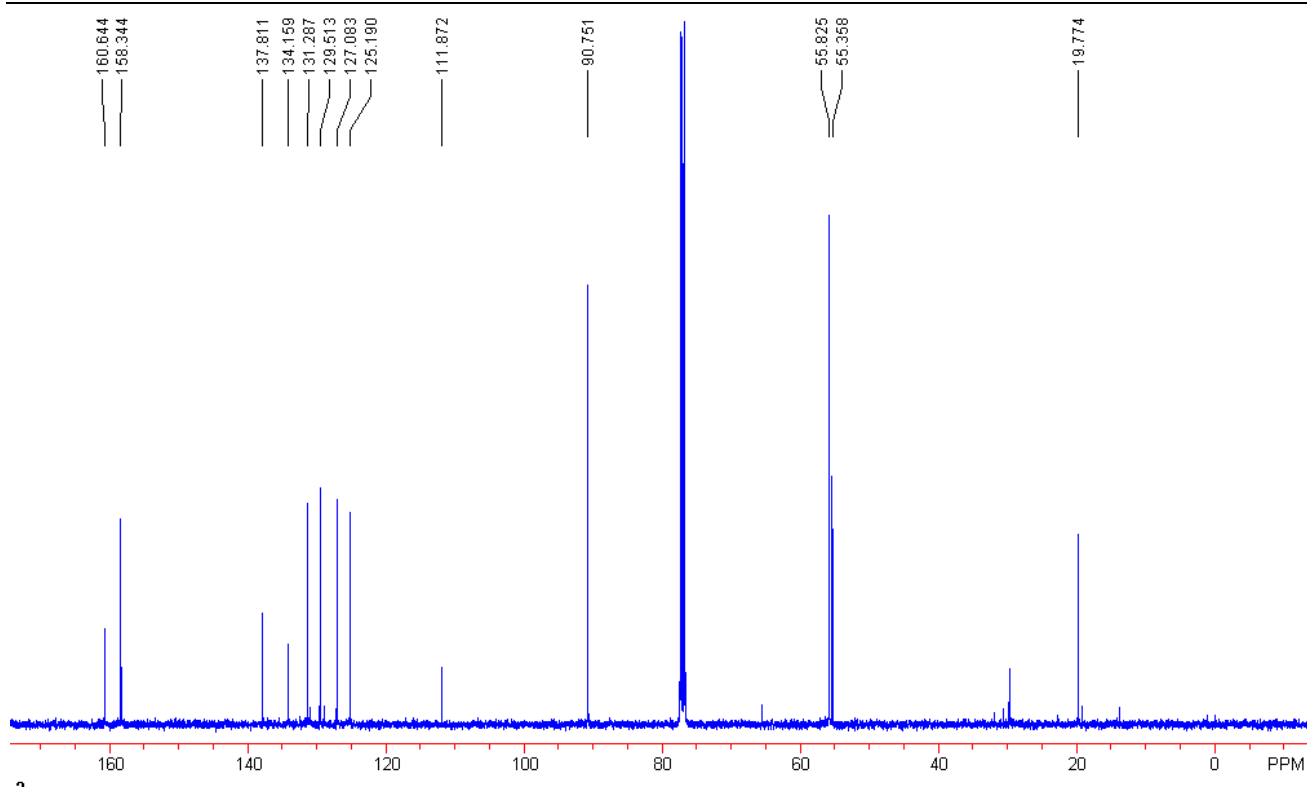

**3',5'-difluoro-2,4,6-trimethoxybiphenyl (3p).**

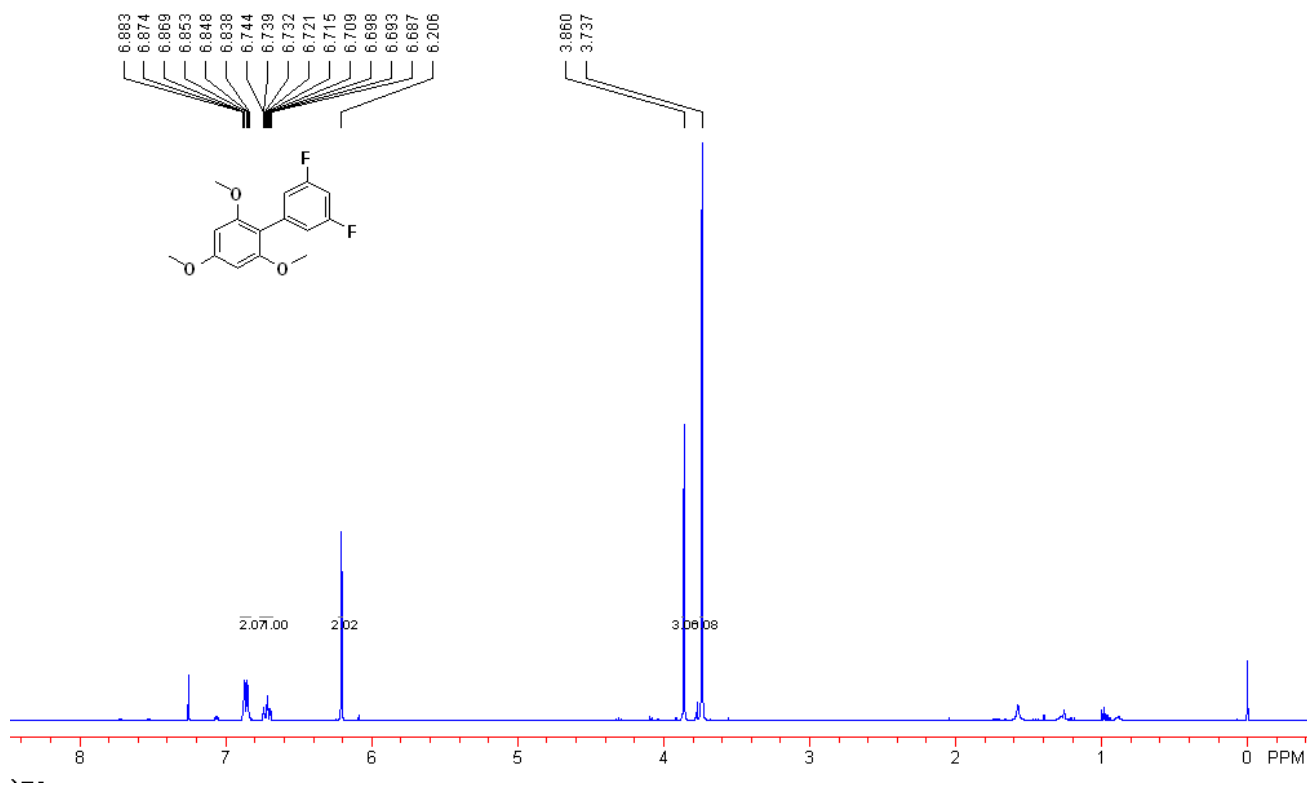

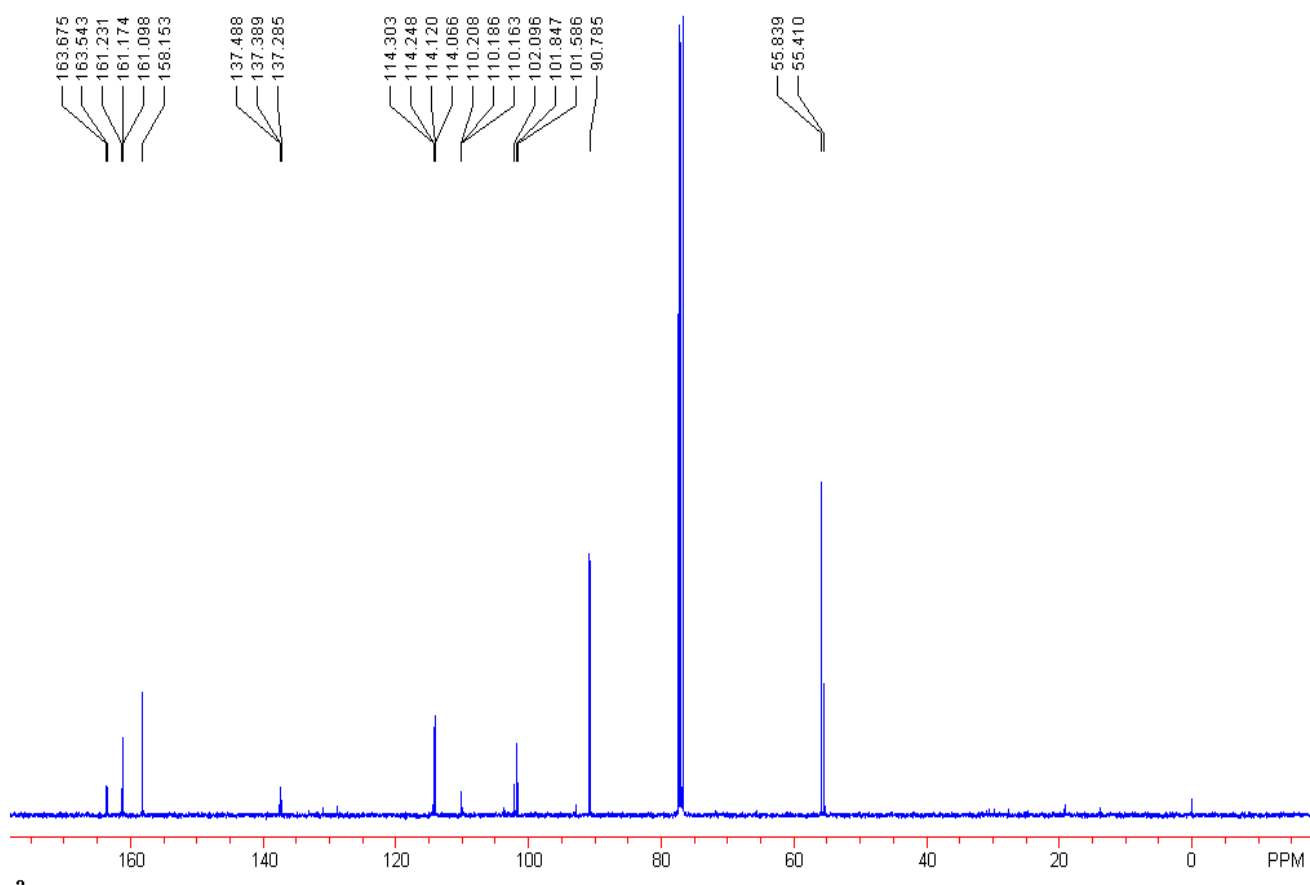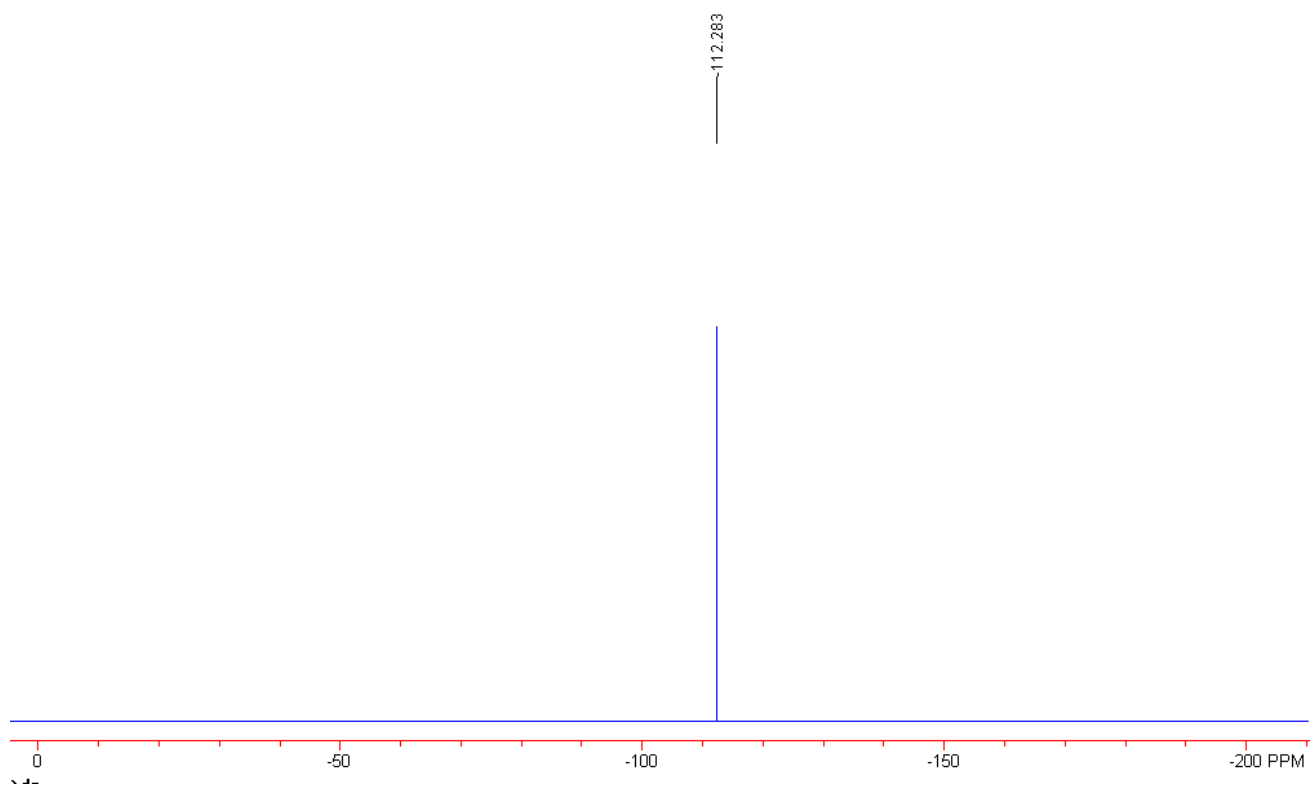

**2,4,6-trimethoxy-3',5'-bis(trifluoromethyl)biphenyl (3q).**

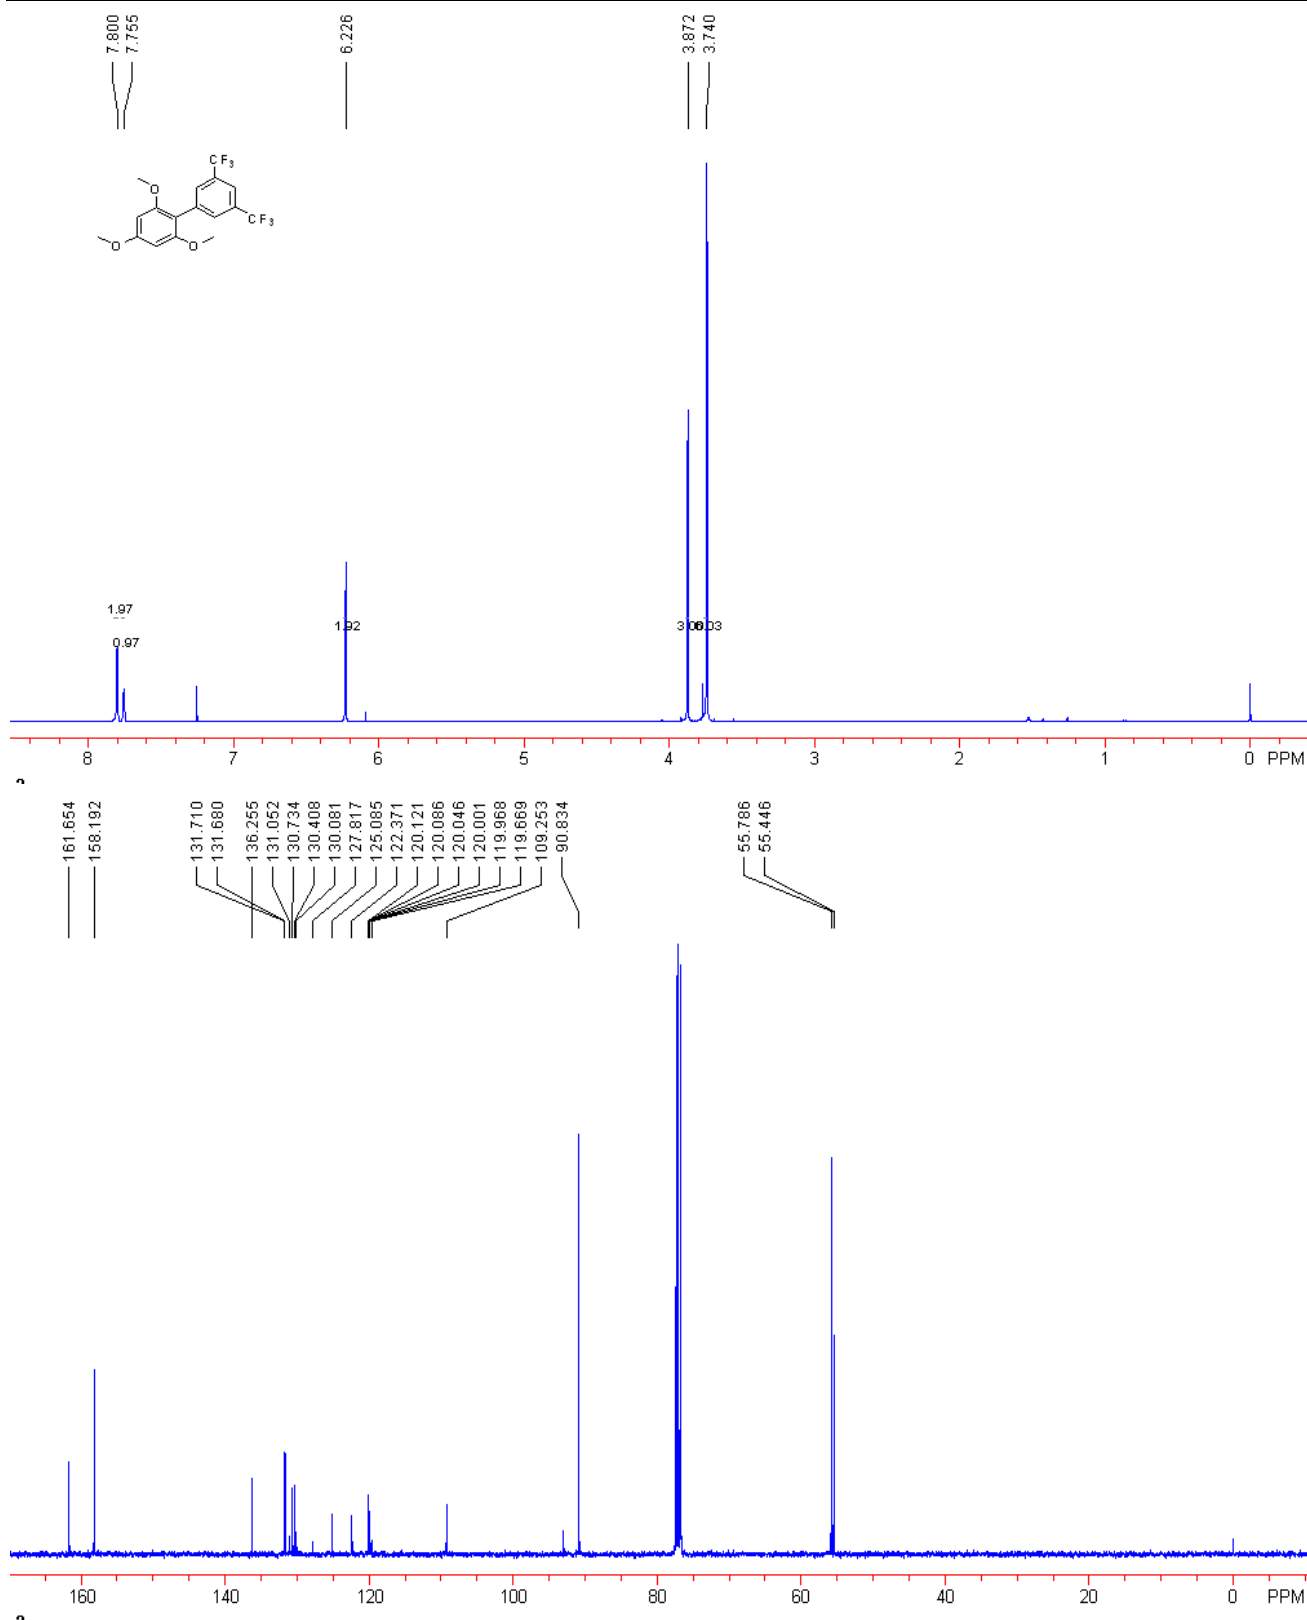

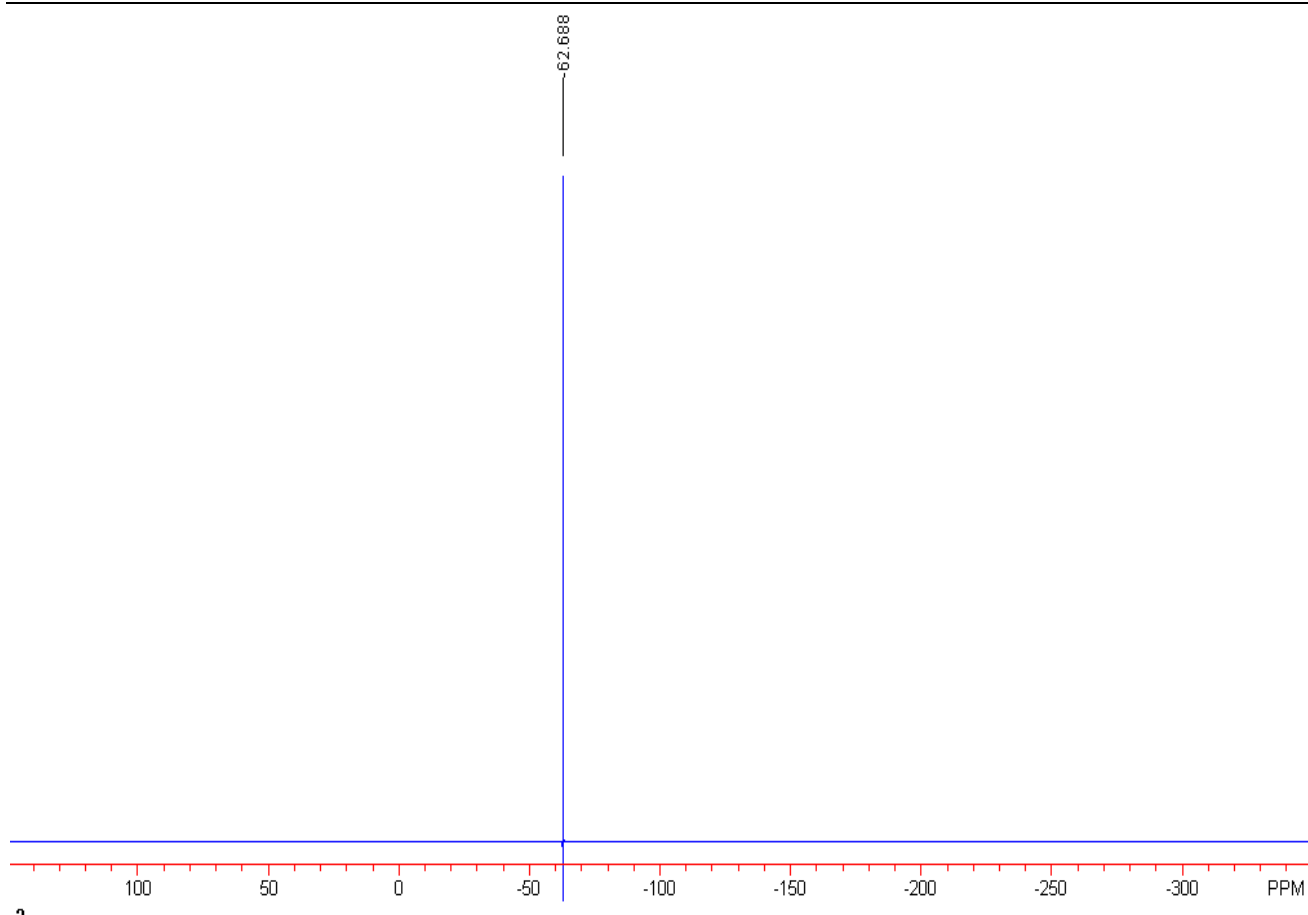

**2,4,6-trimethoxy-3',5'-dimethylbiphenyl (3r).**

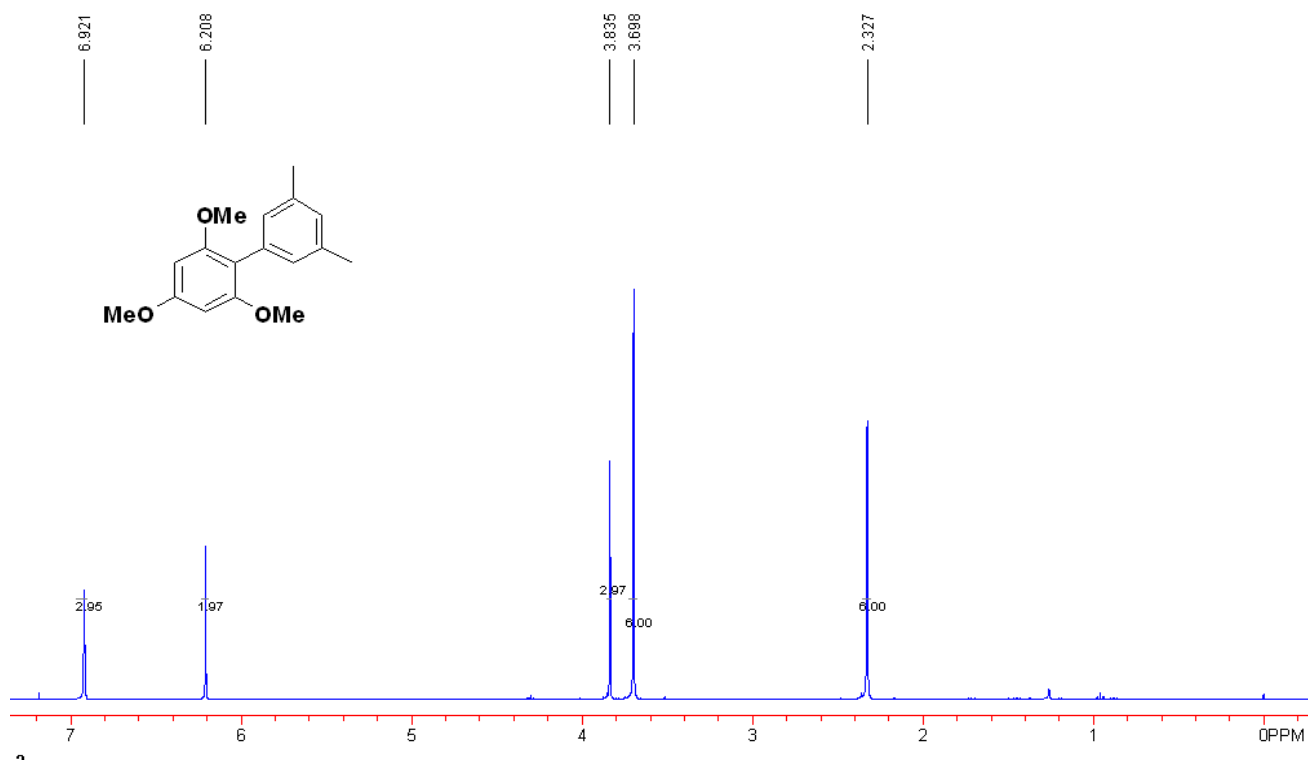

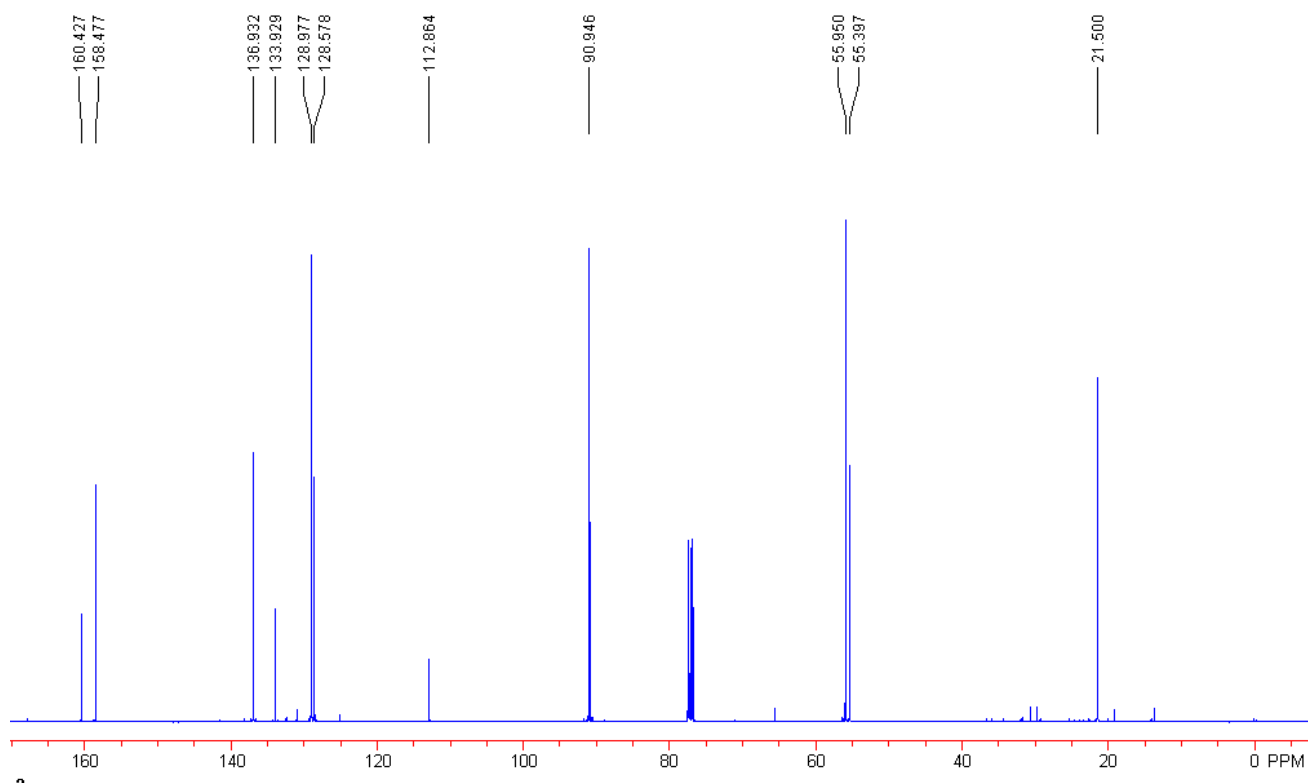

**2,3',6-trimethoxybiphenyl (4a).**

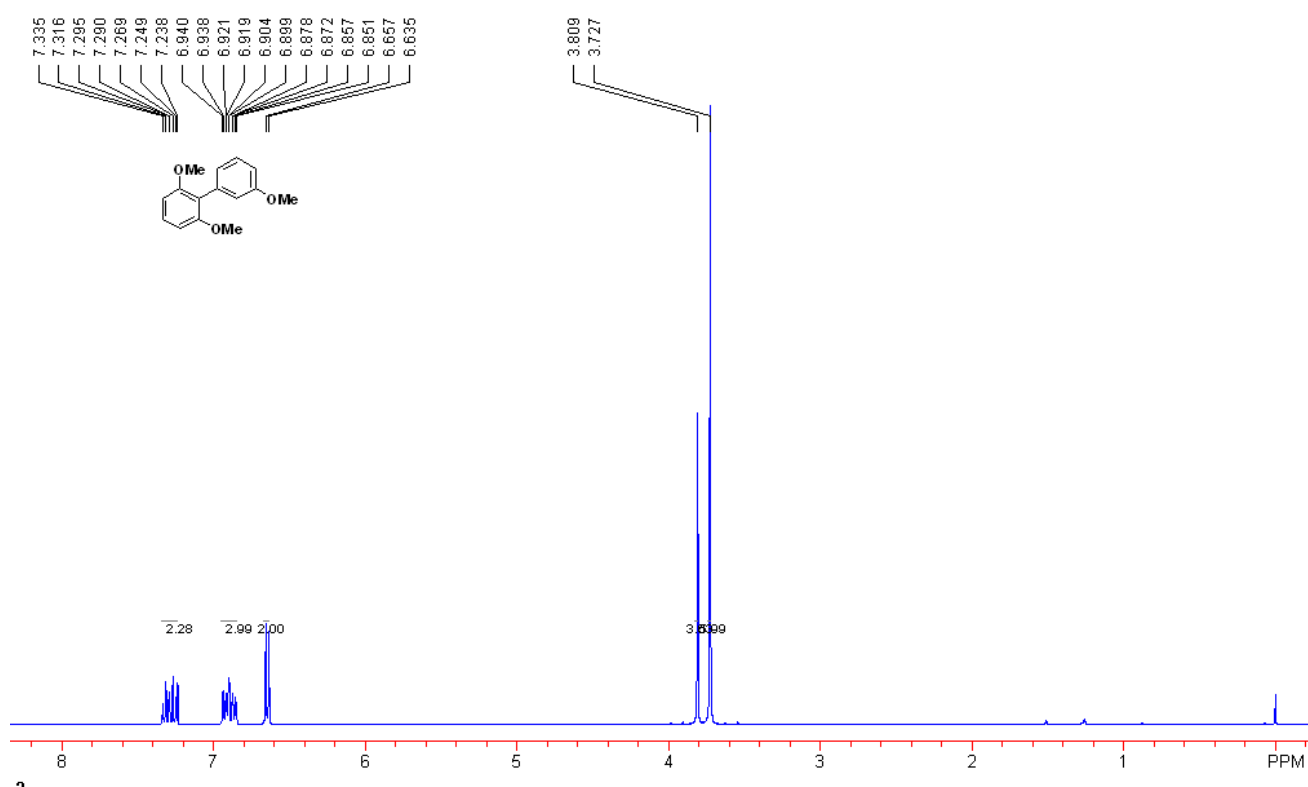

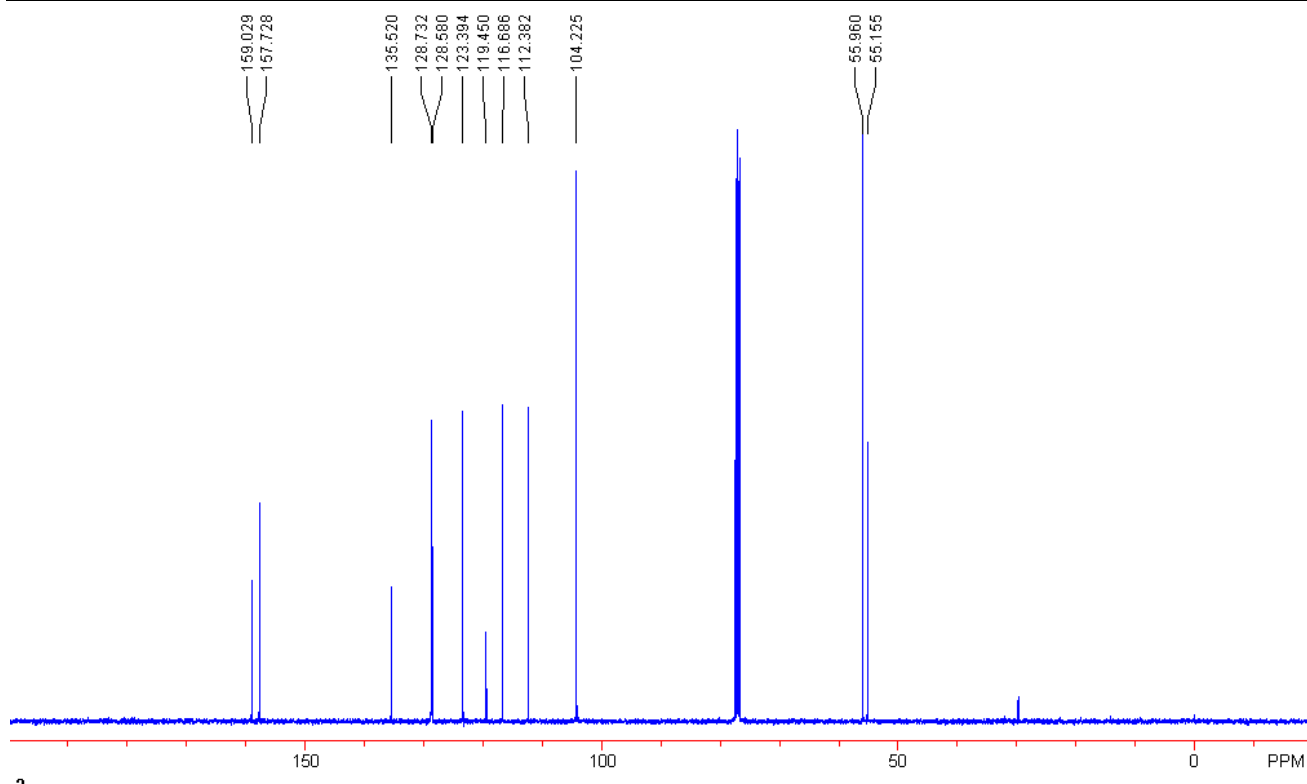

**2',6'-difluorobiphenyl-4-carbonitrile (4b).**

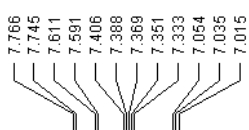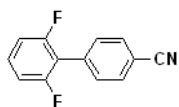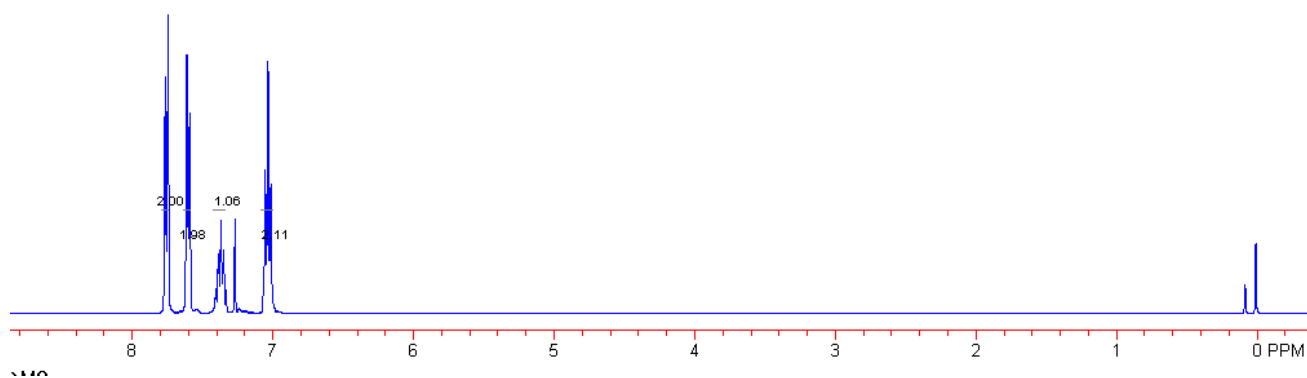

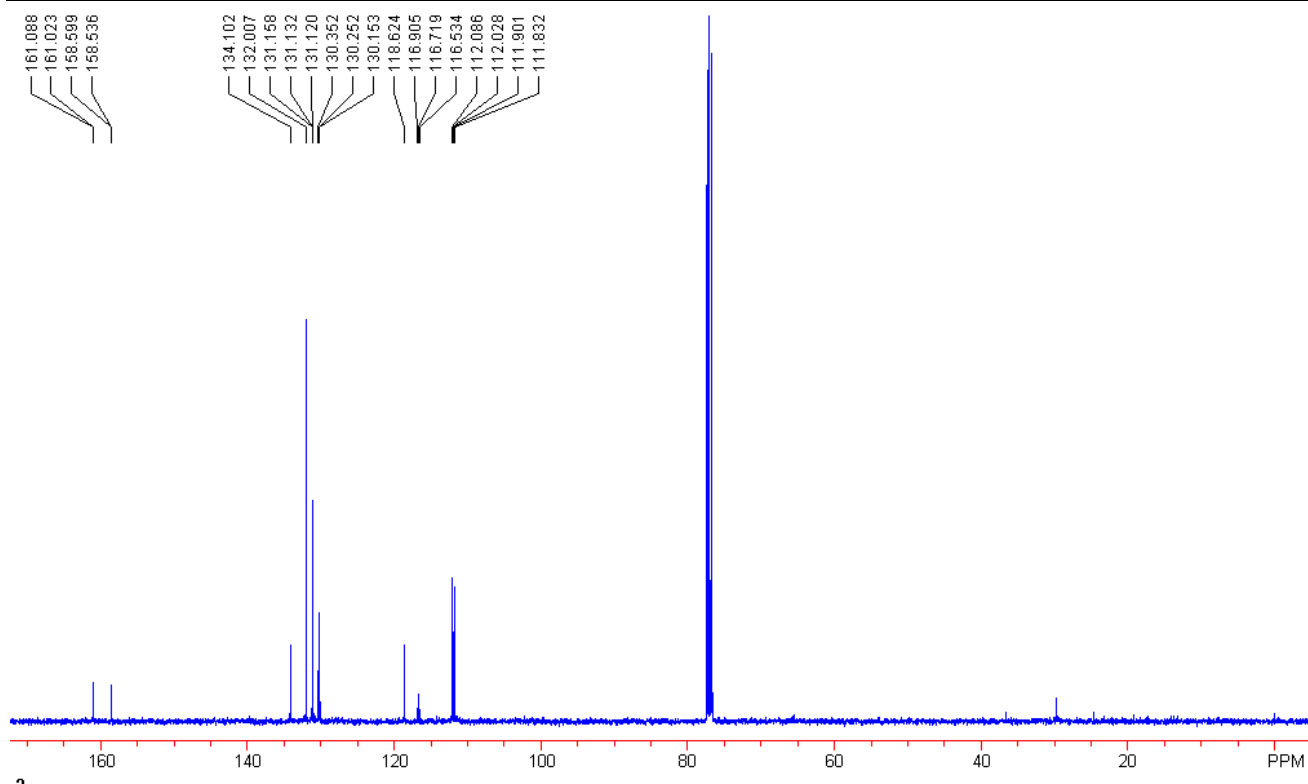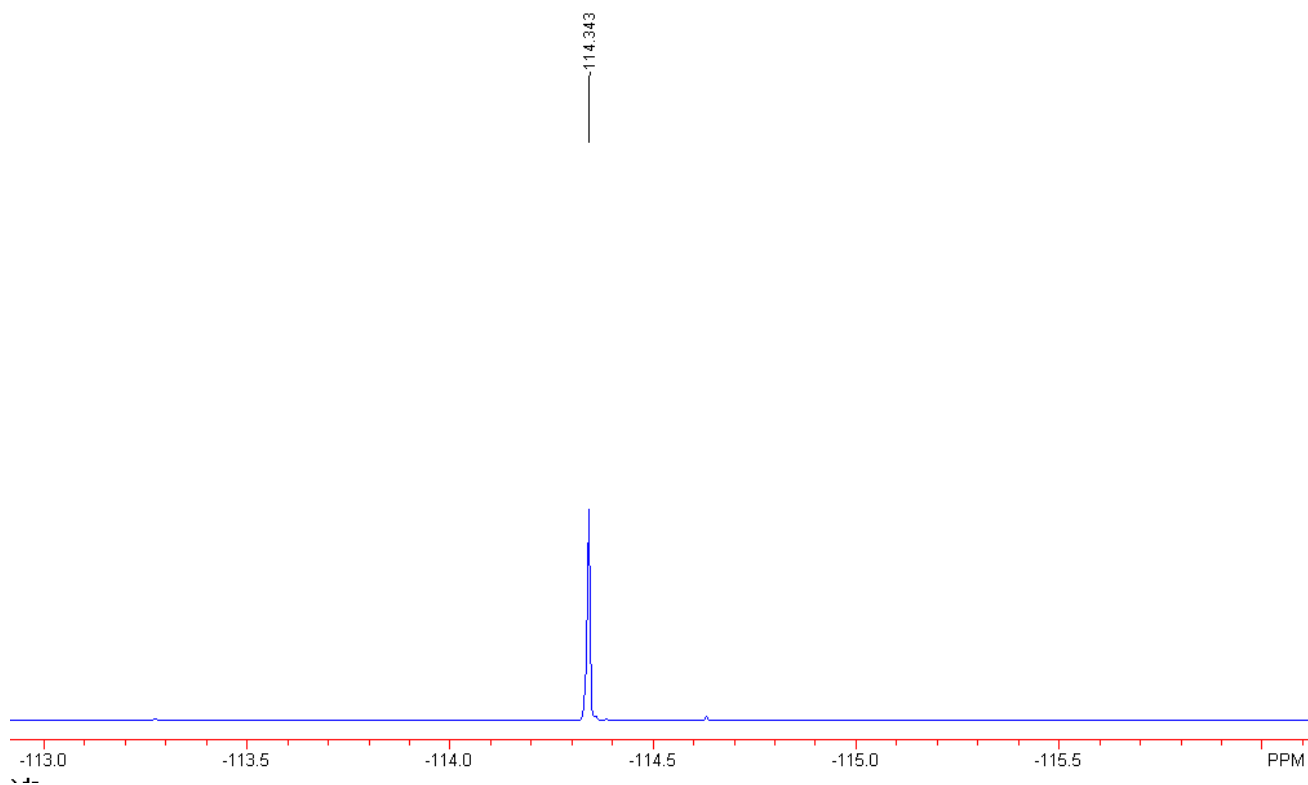

**4'-phenyl-2-nitrobiphenyl (4c).**

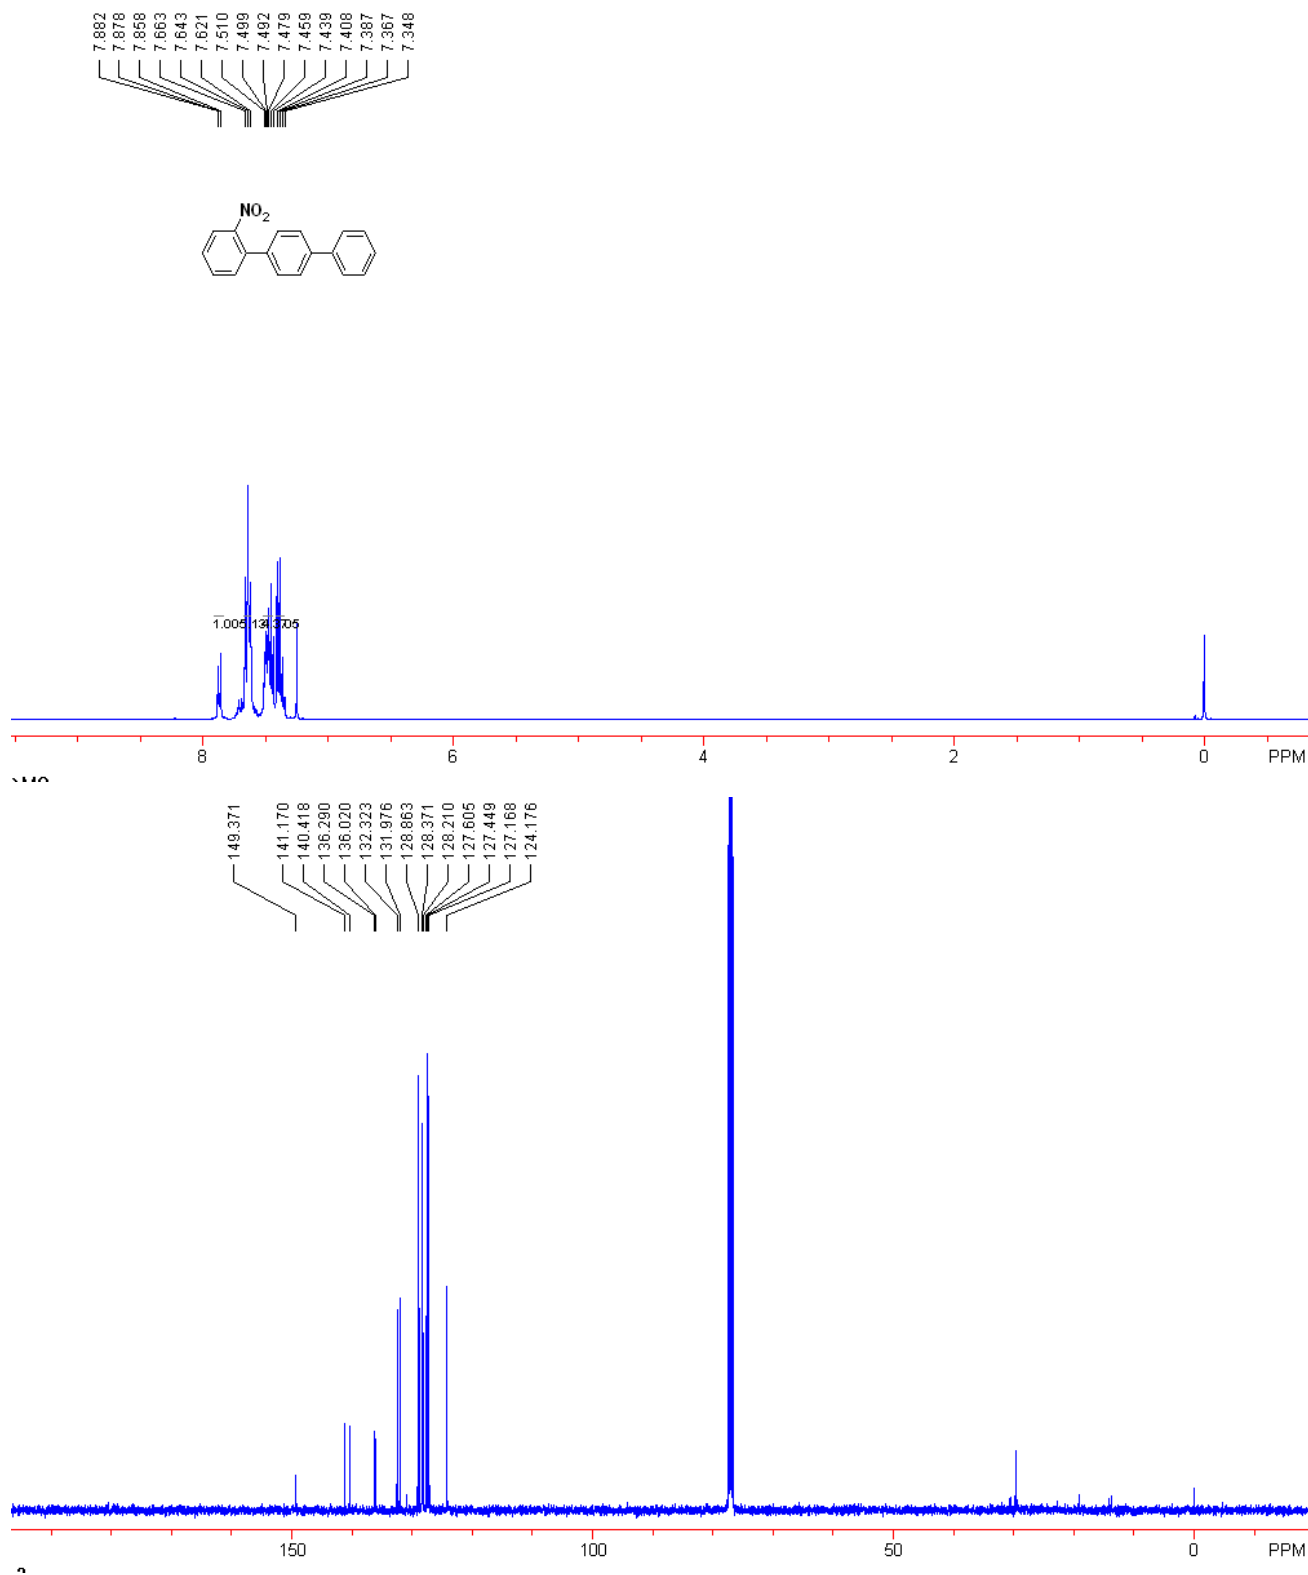

**2,4,5-trimethoxy-4'-methylbiphenyl (5a).**



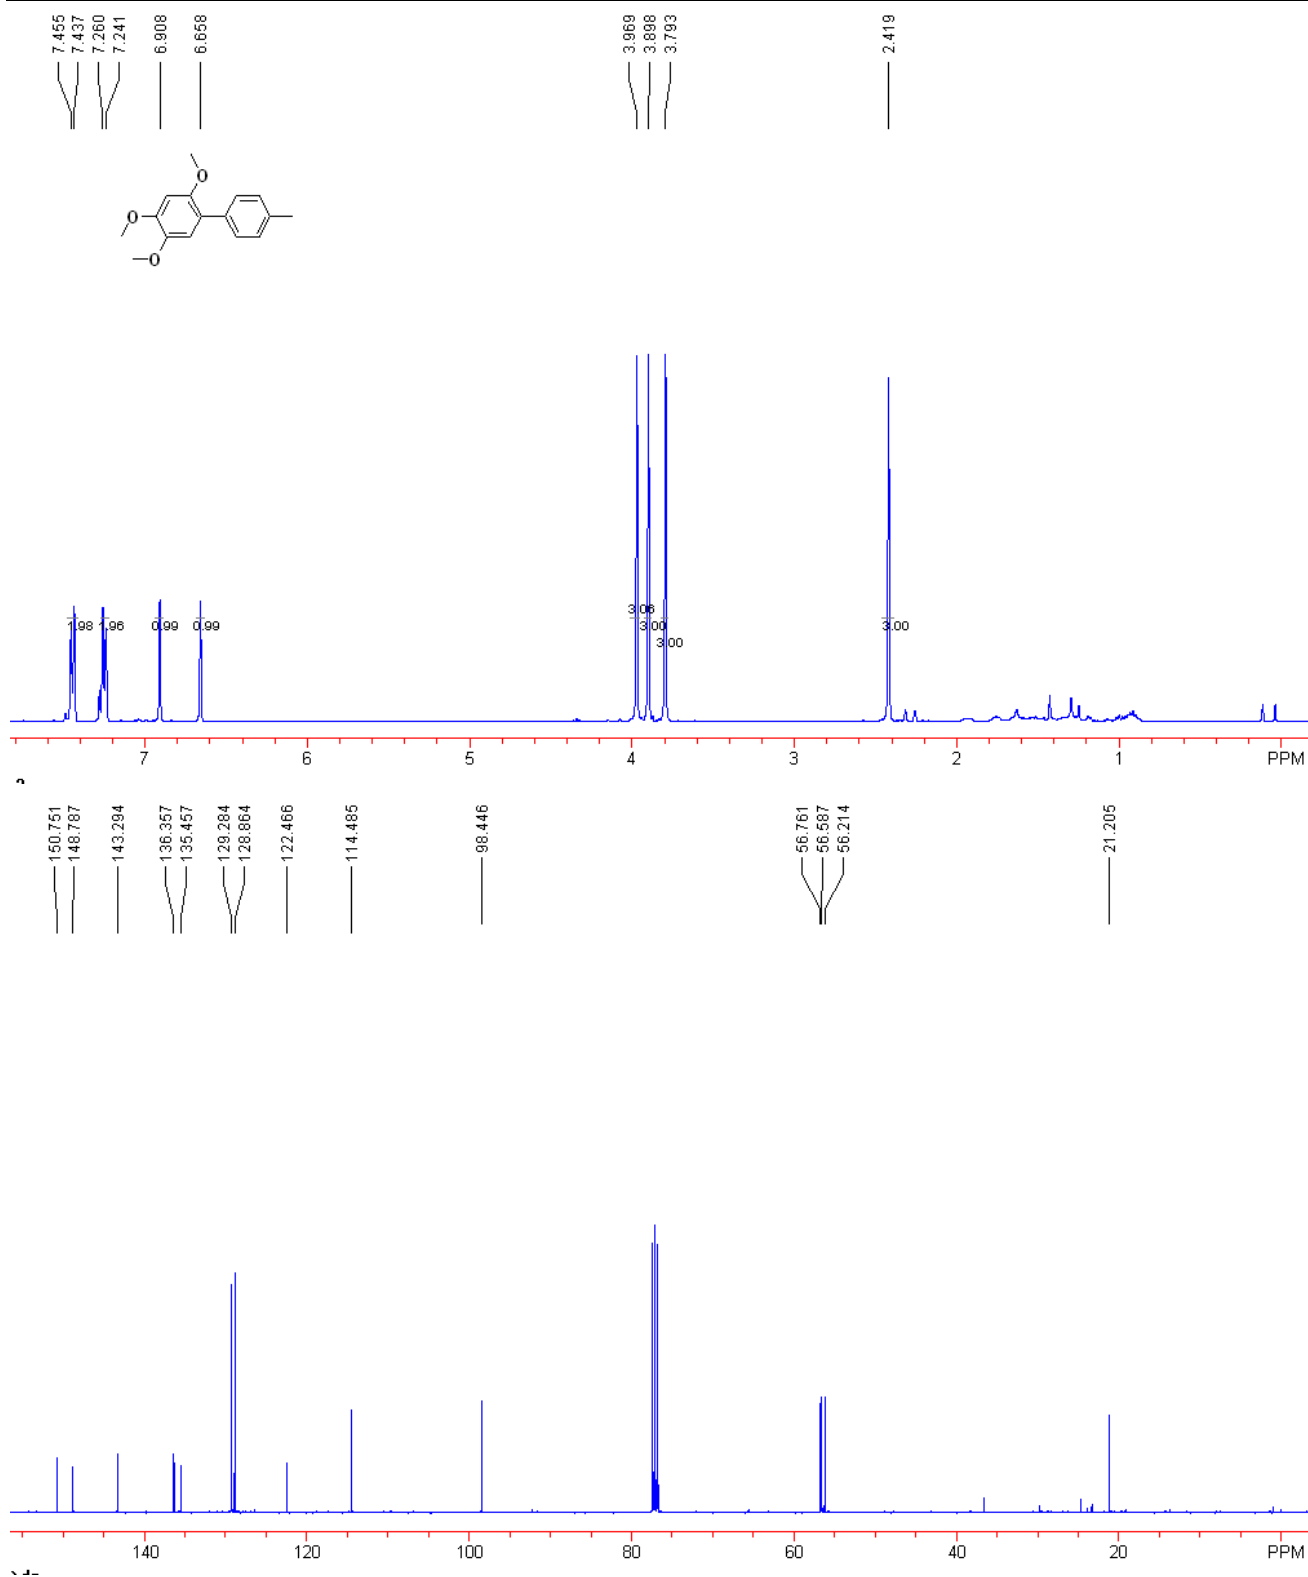

**2,6-dimethoxy-4'-methylbiphenyl (5b).**

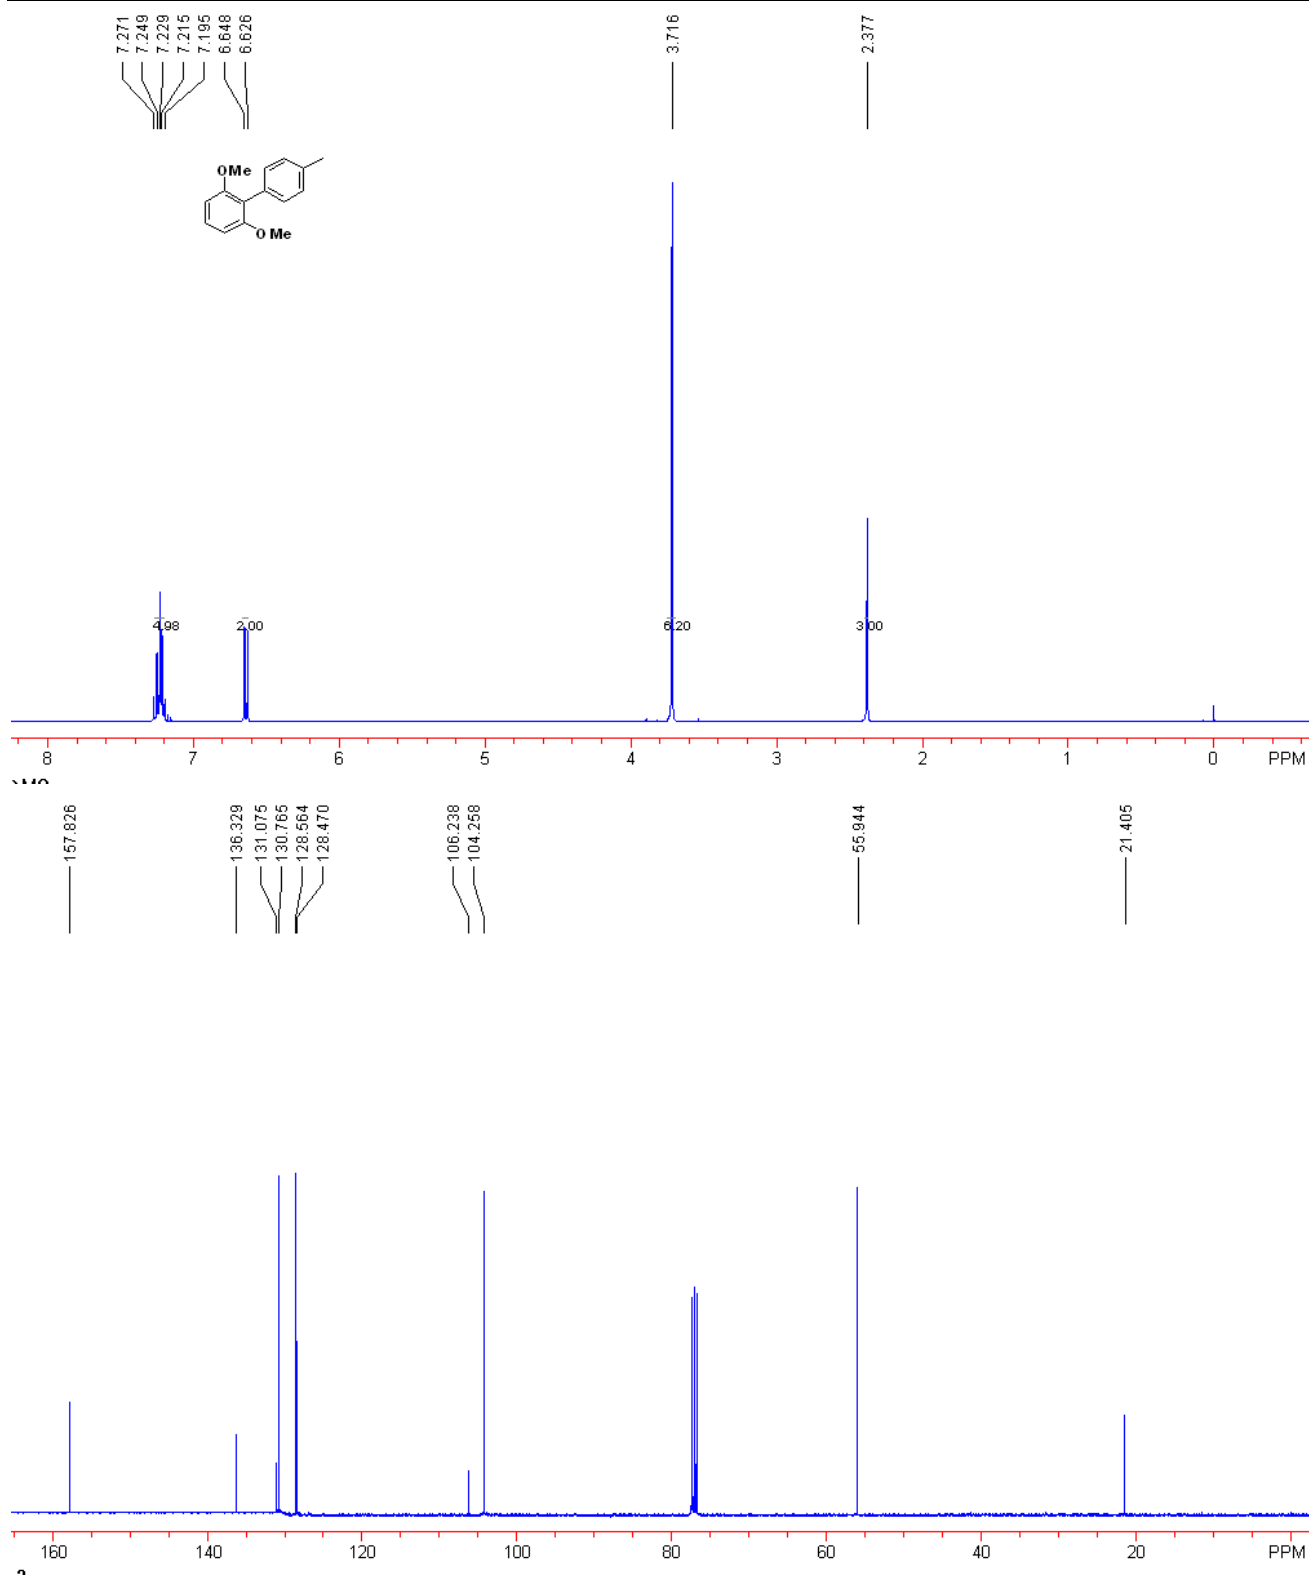

**5-(2,6-dimethoxyphenyl)benzo[d][1,3]dioxole (5c).**

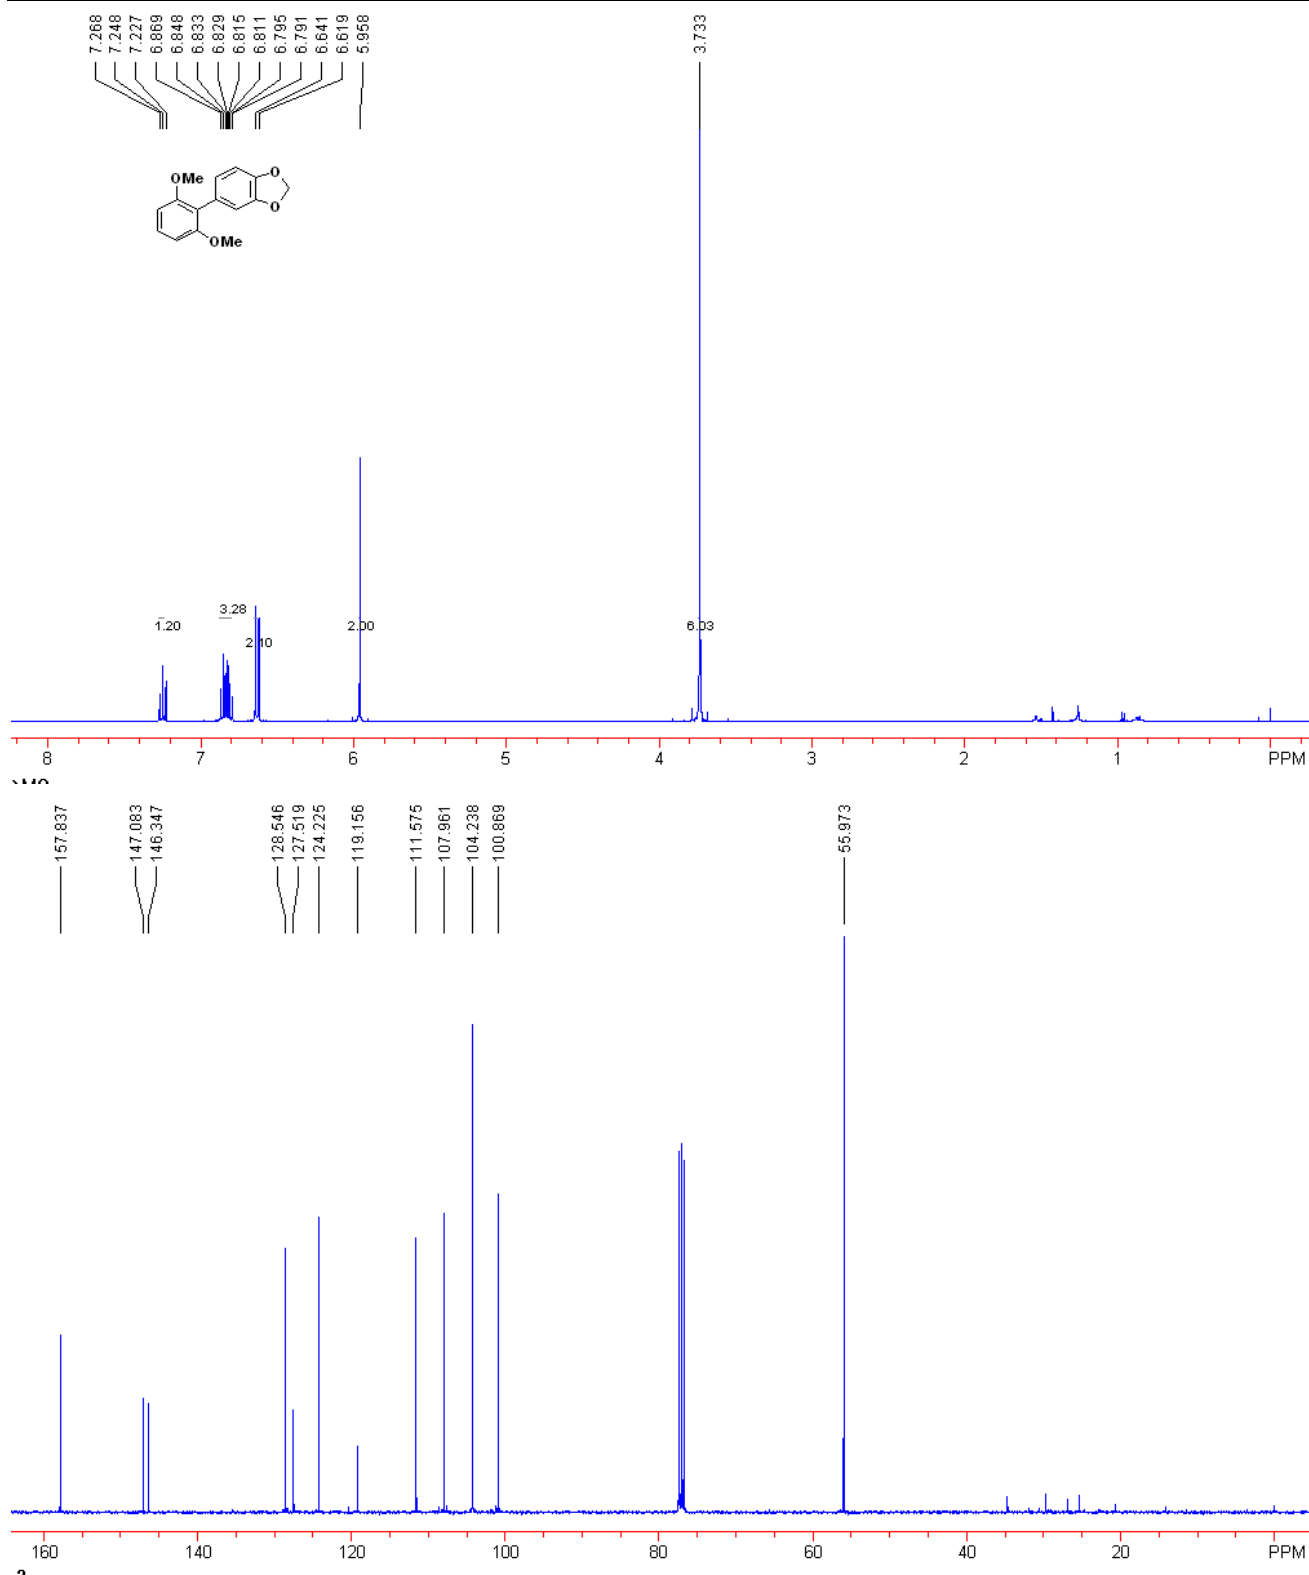

**4'-bromo-2,6-dimethoxybiphenyl (5d).**

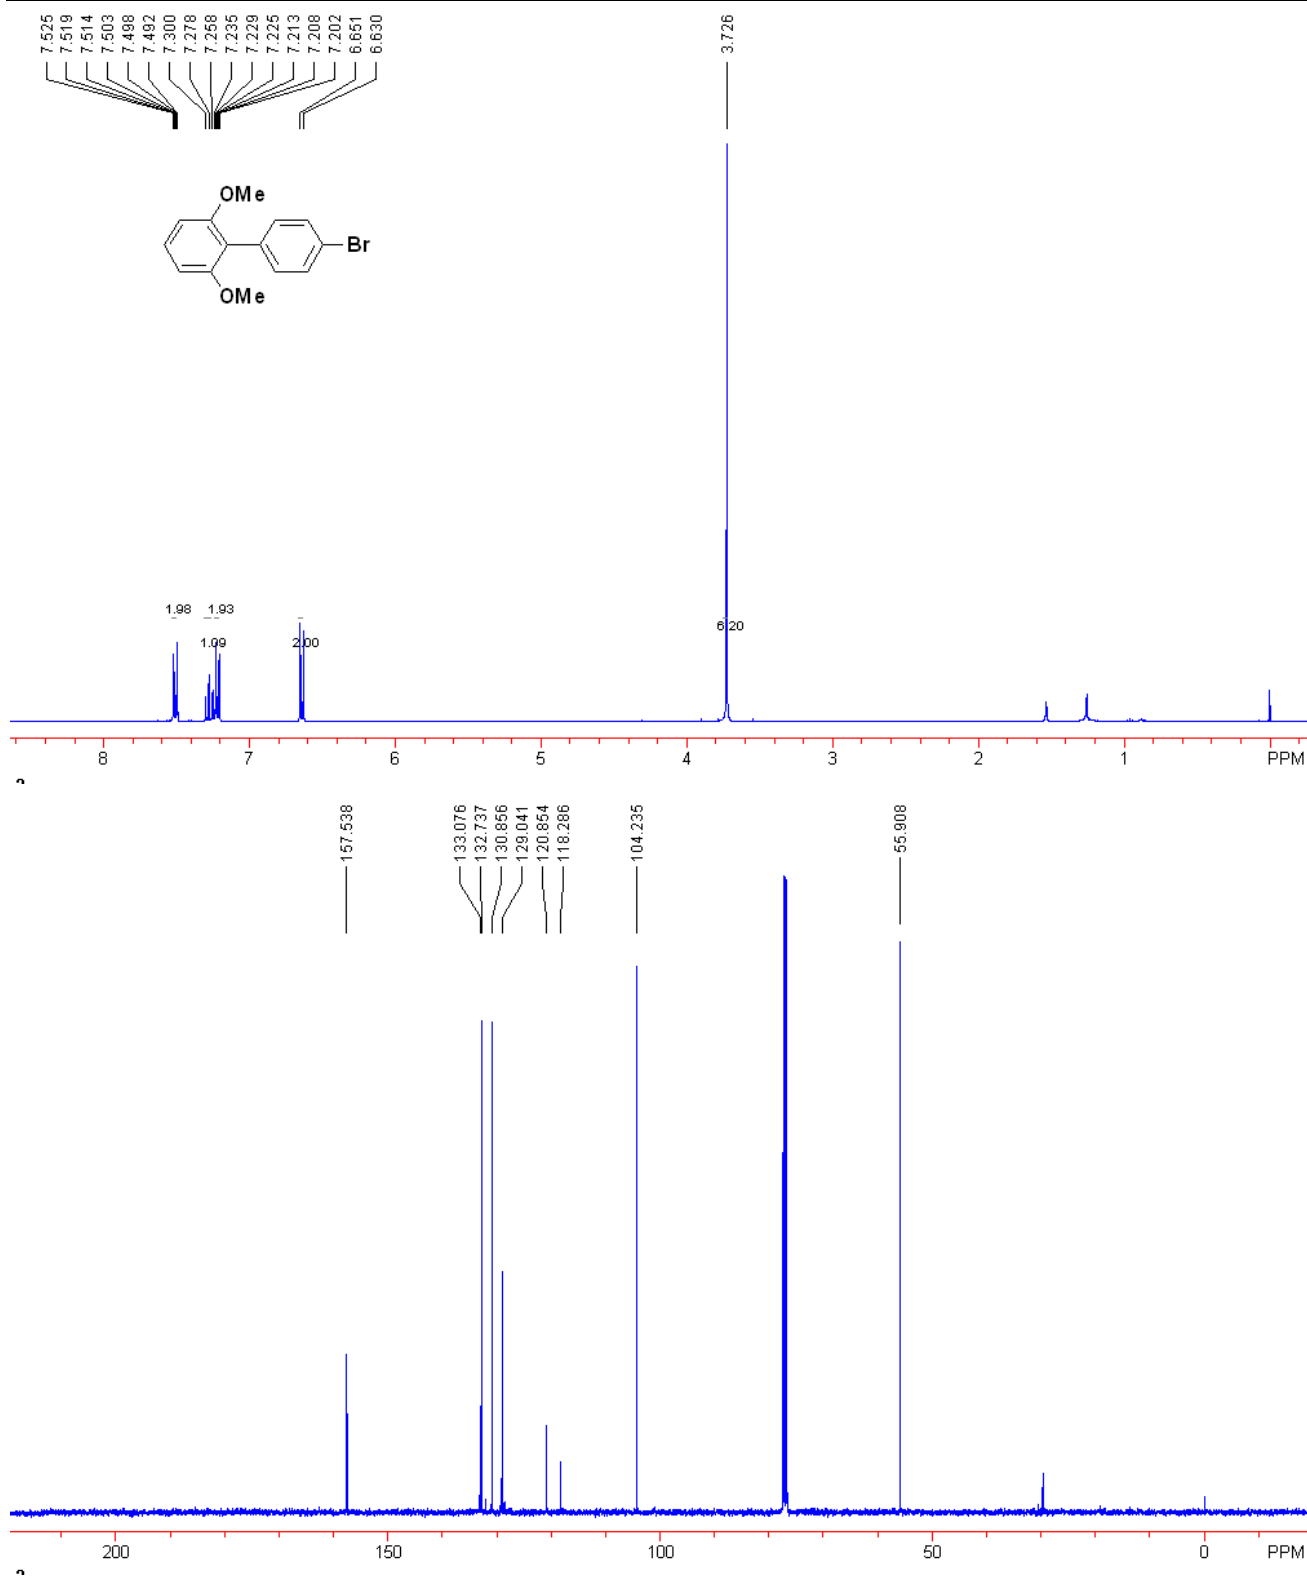

**4'-chloro-2,6-dimethoxybiphenyl (5c).**

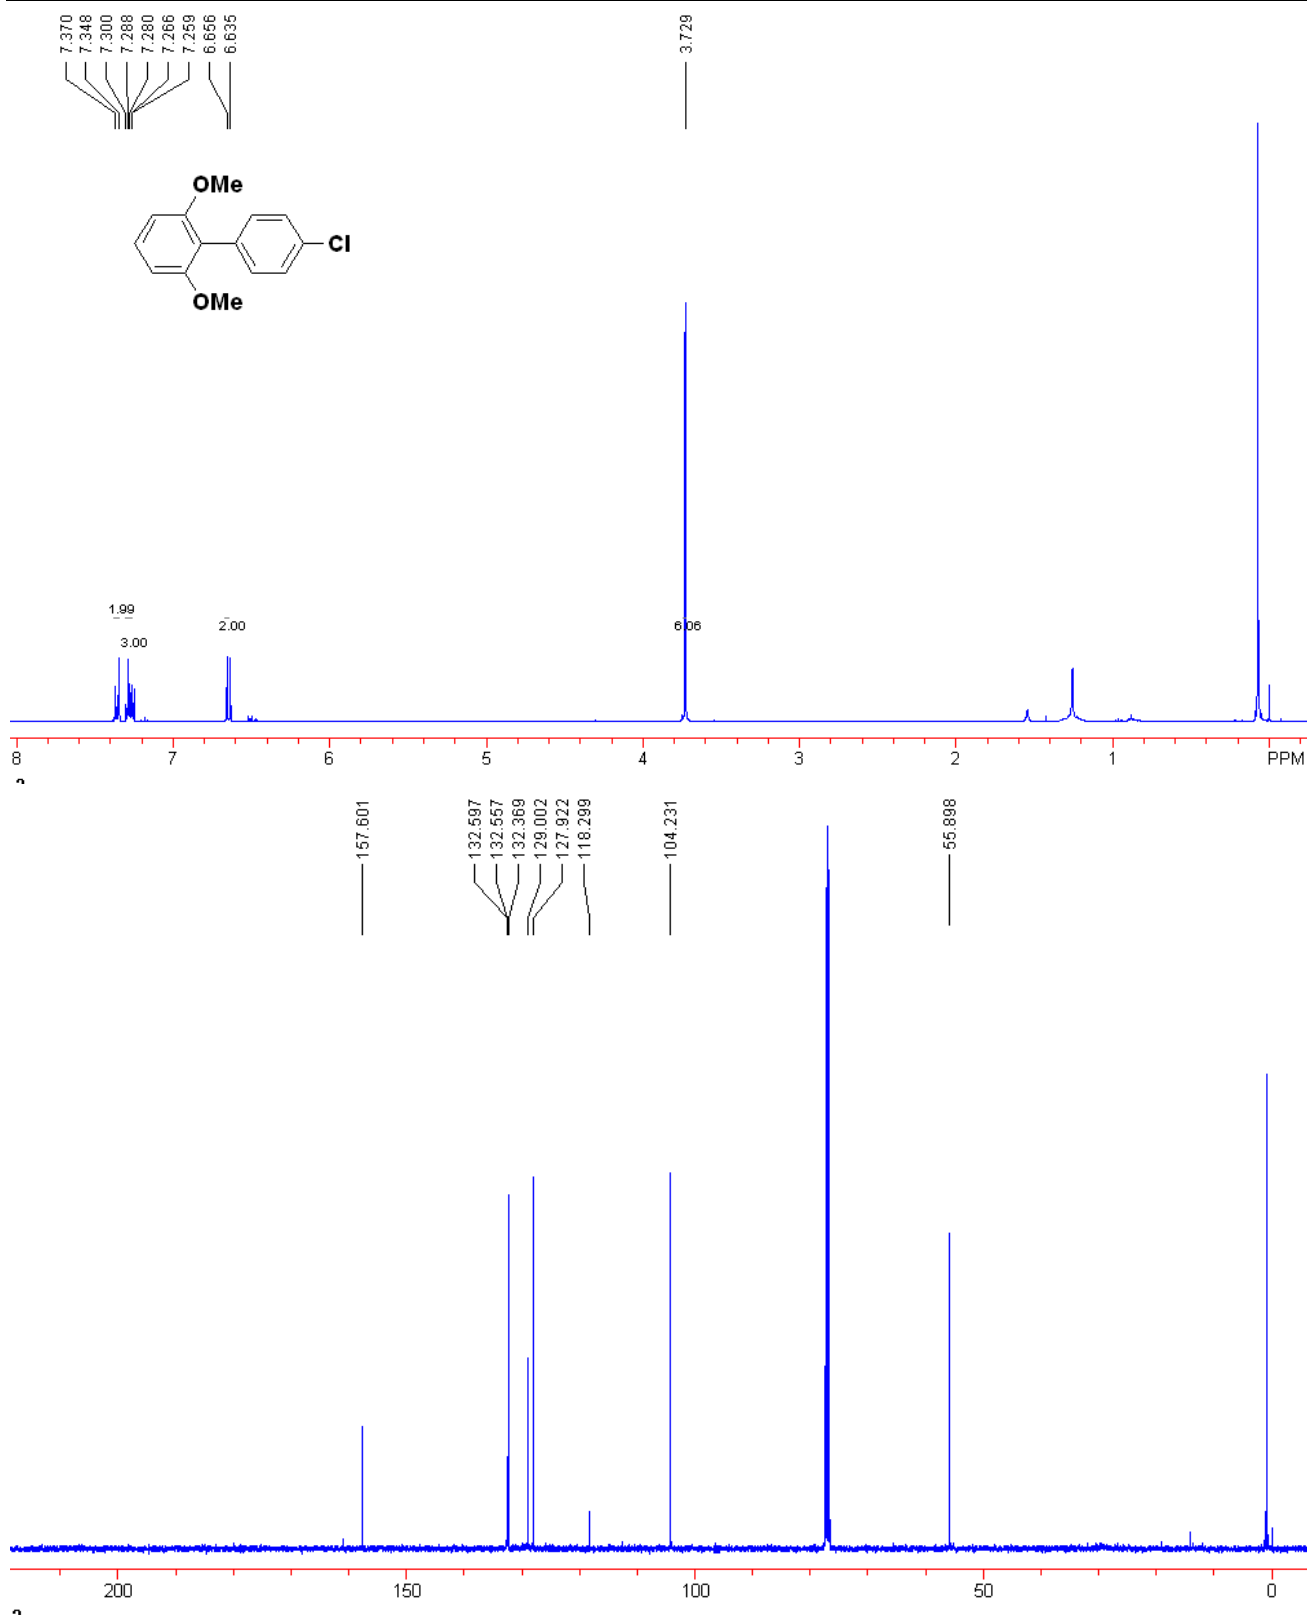

**3'-chloro-2,6-dimethoxybiphenyl (5f).**

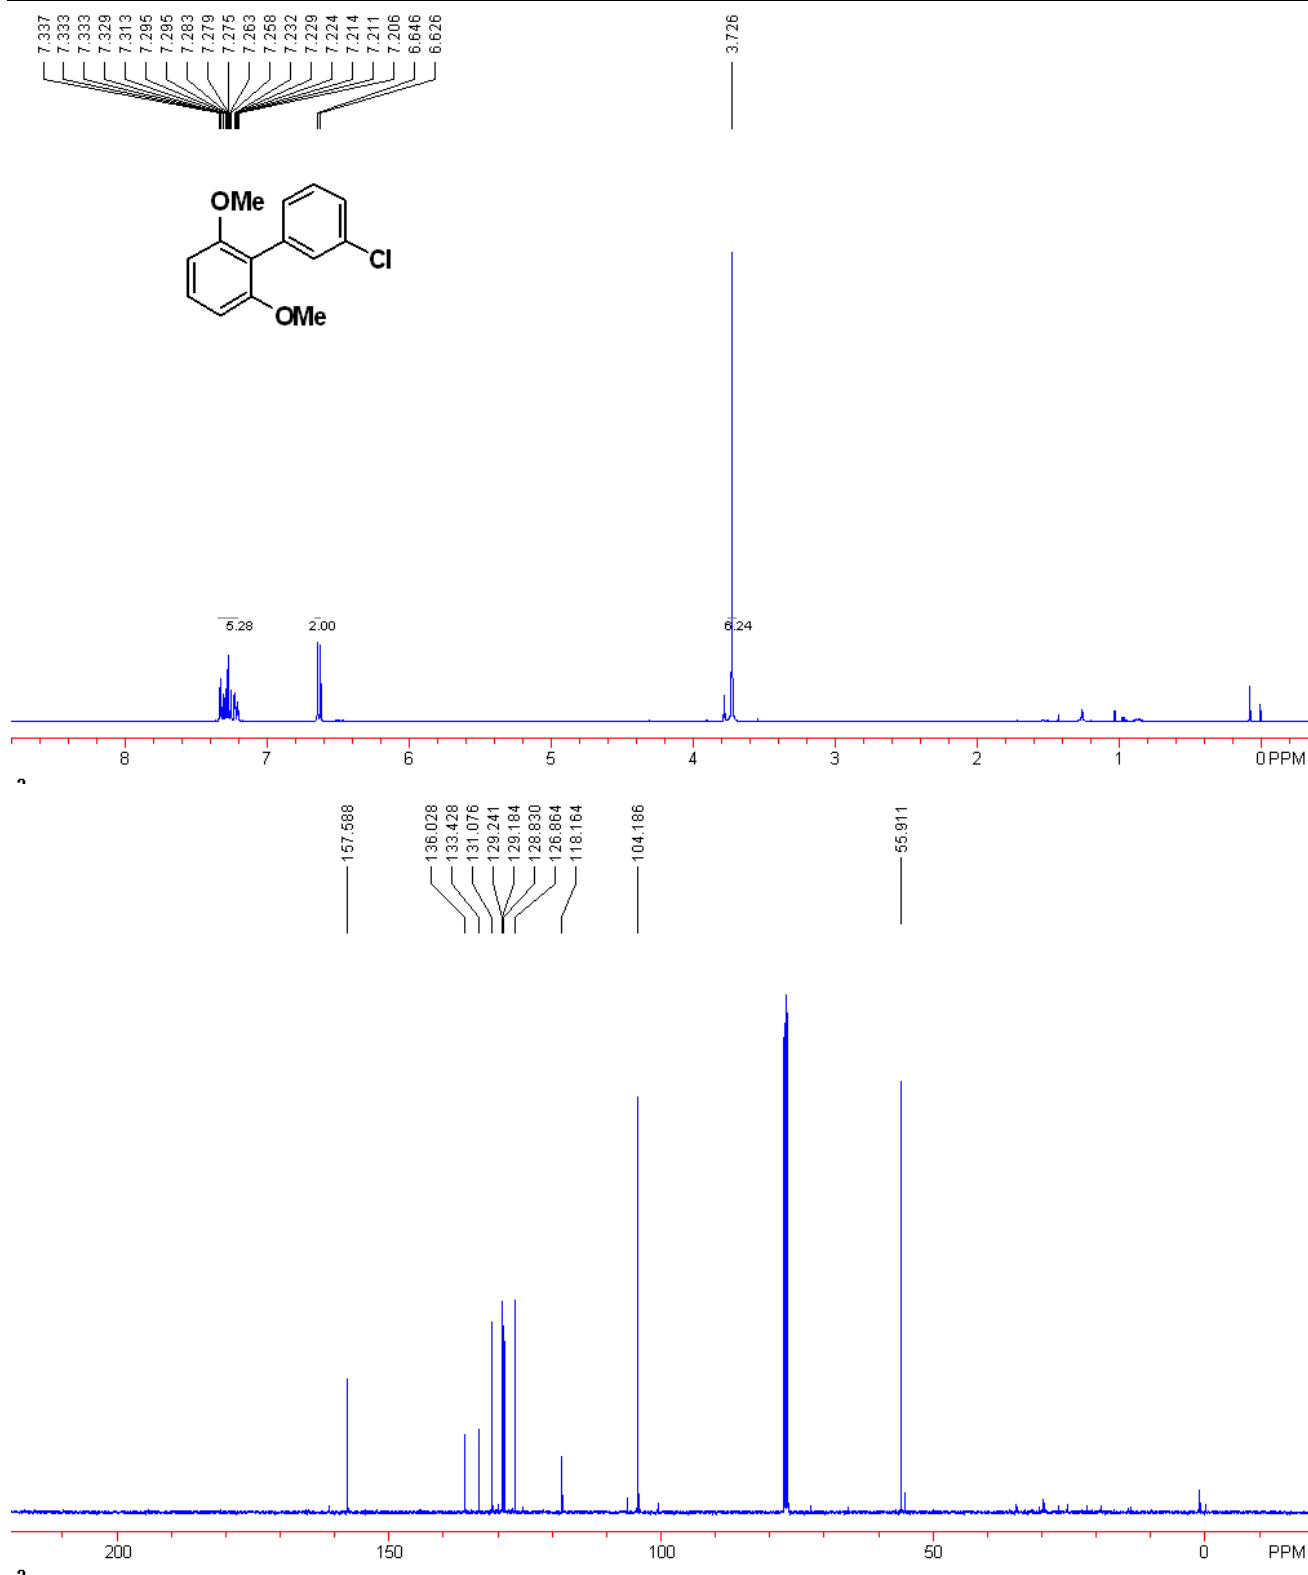

**4'-bromo-2,4-dimethoxybiphenyl (5g).**

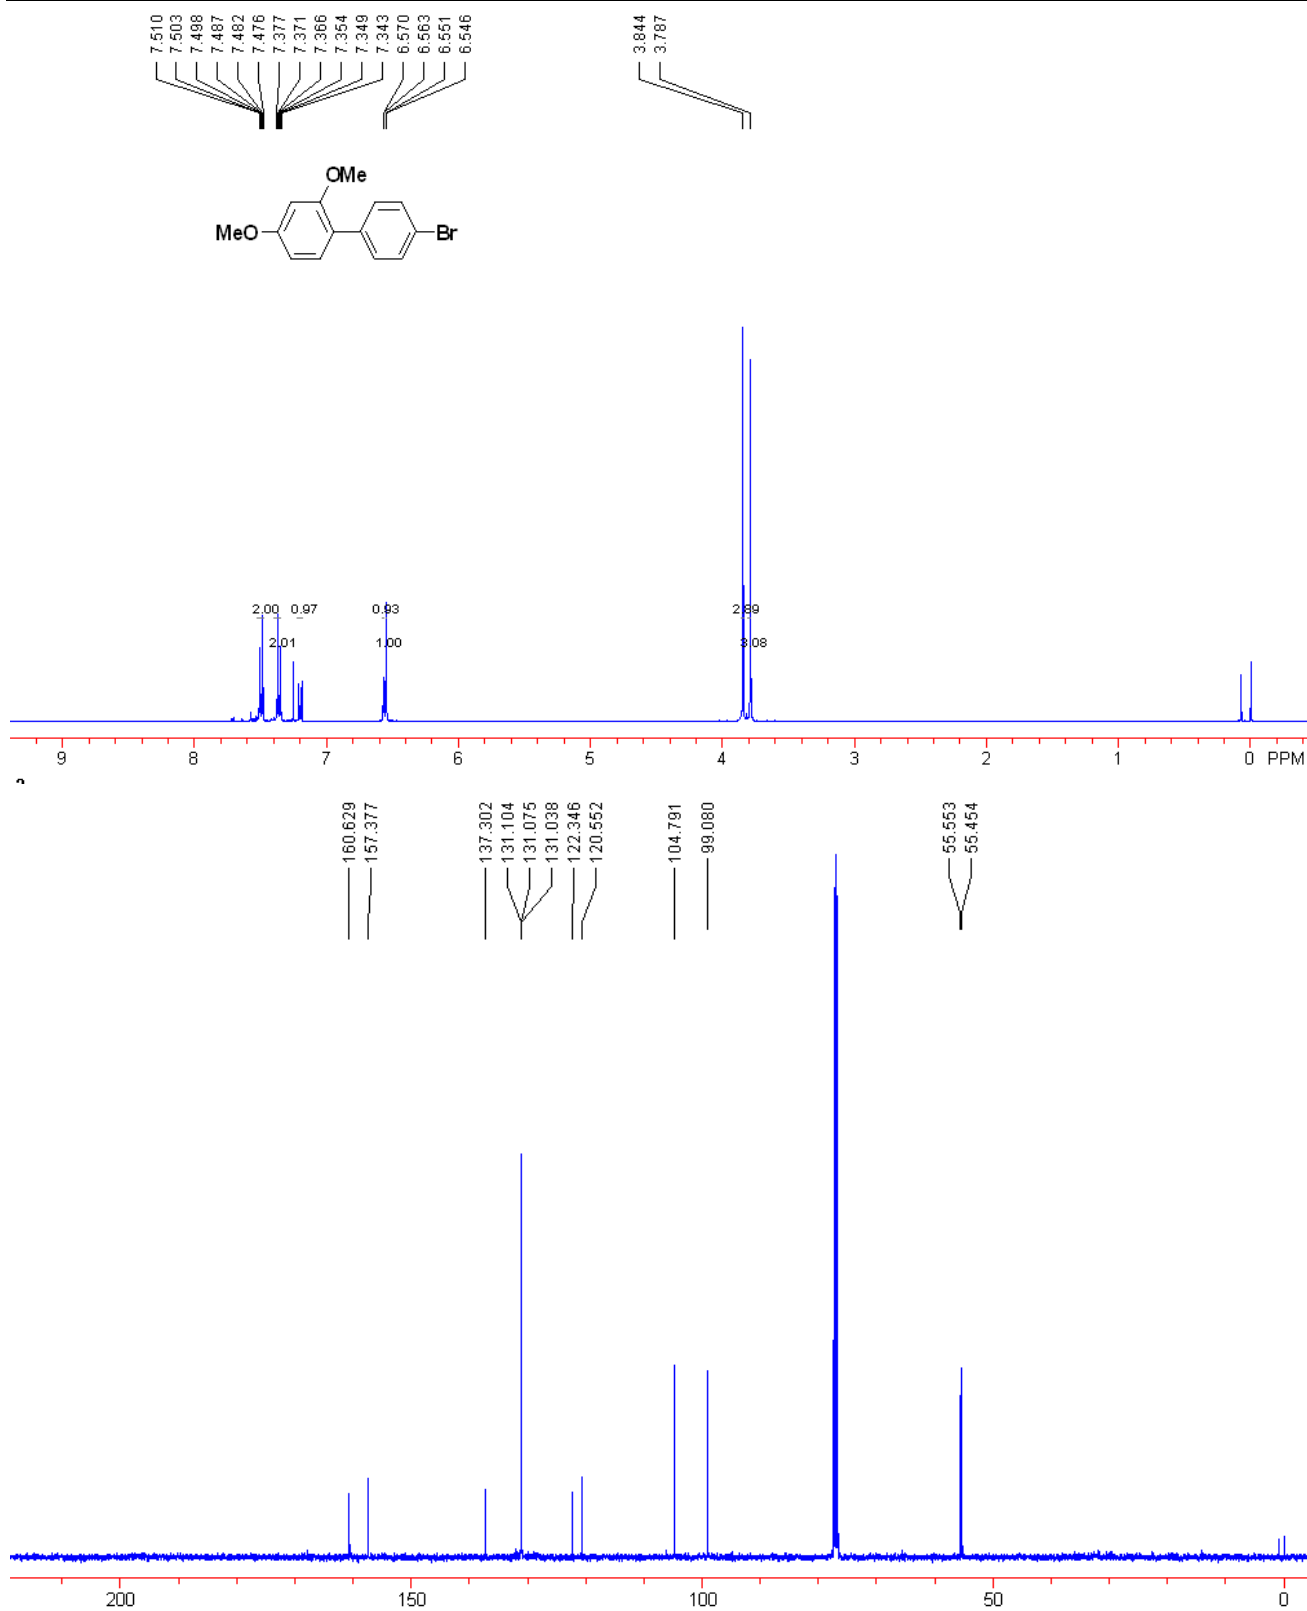

**4'-tert-butyl-2,4-dimethoxybiphenyl (5h).**

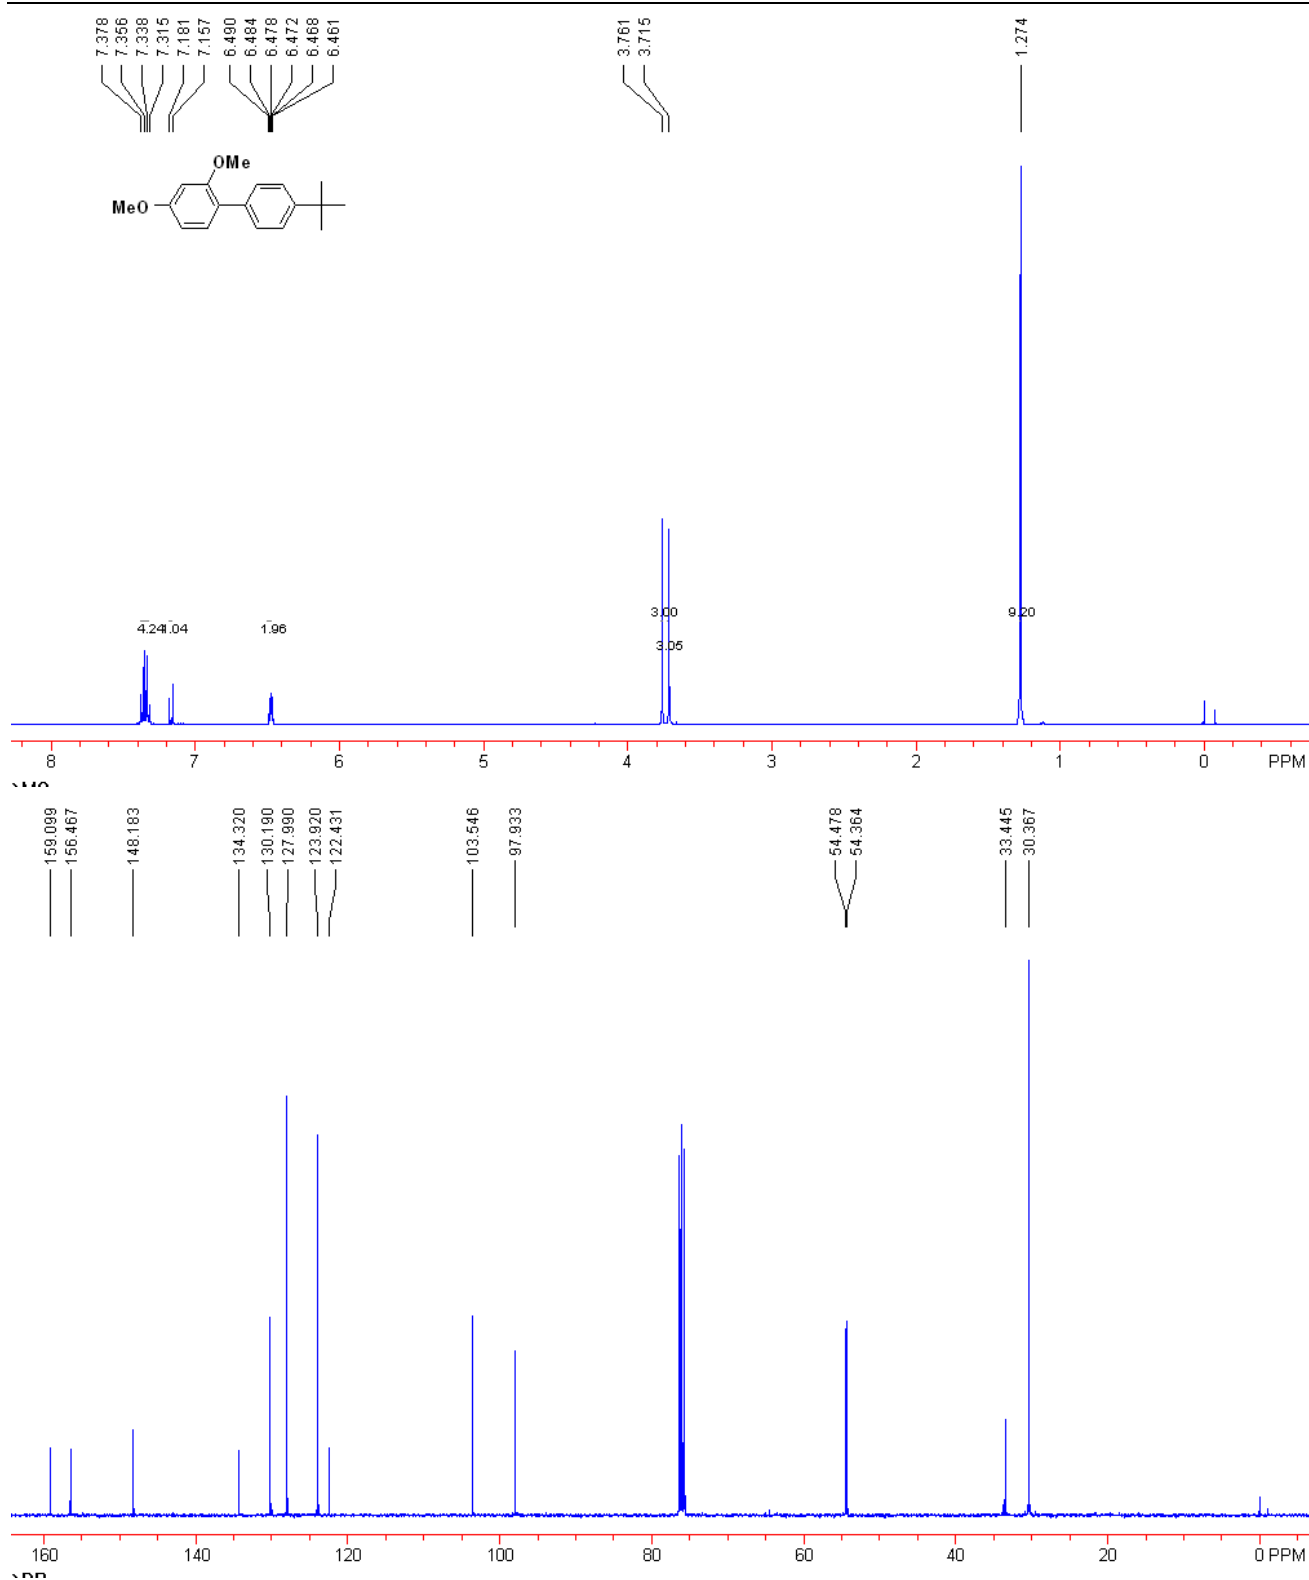

**2-(4-methoxyphenyl)-5-nitrofur (5i).**



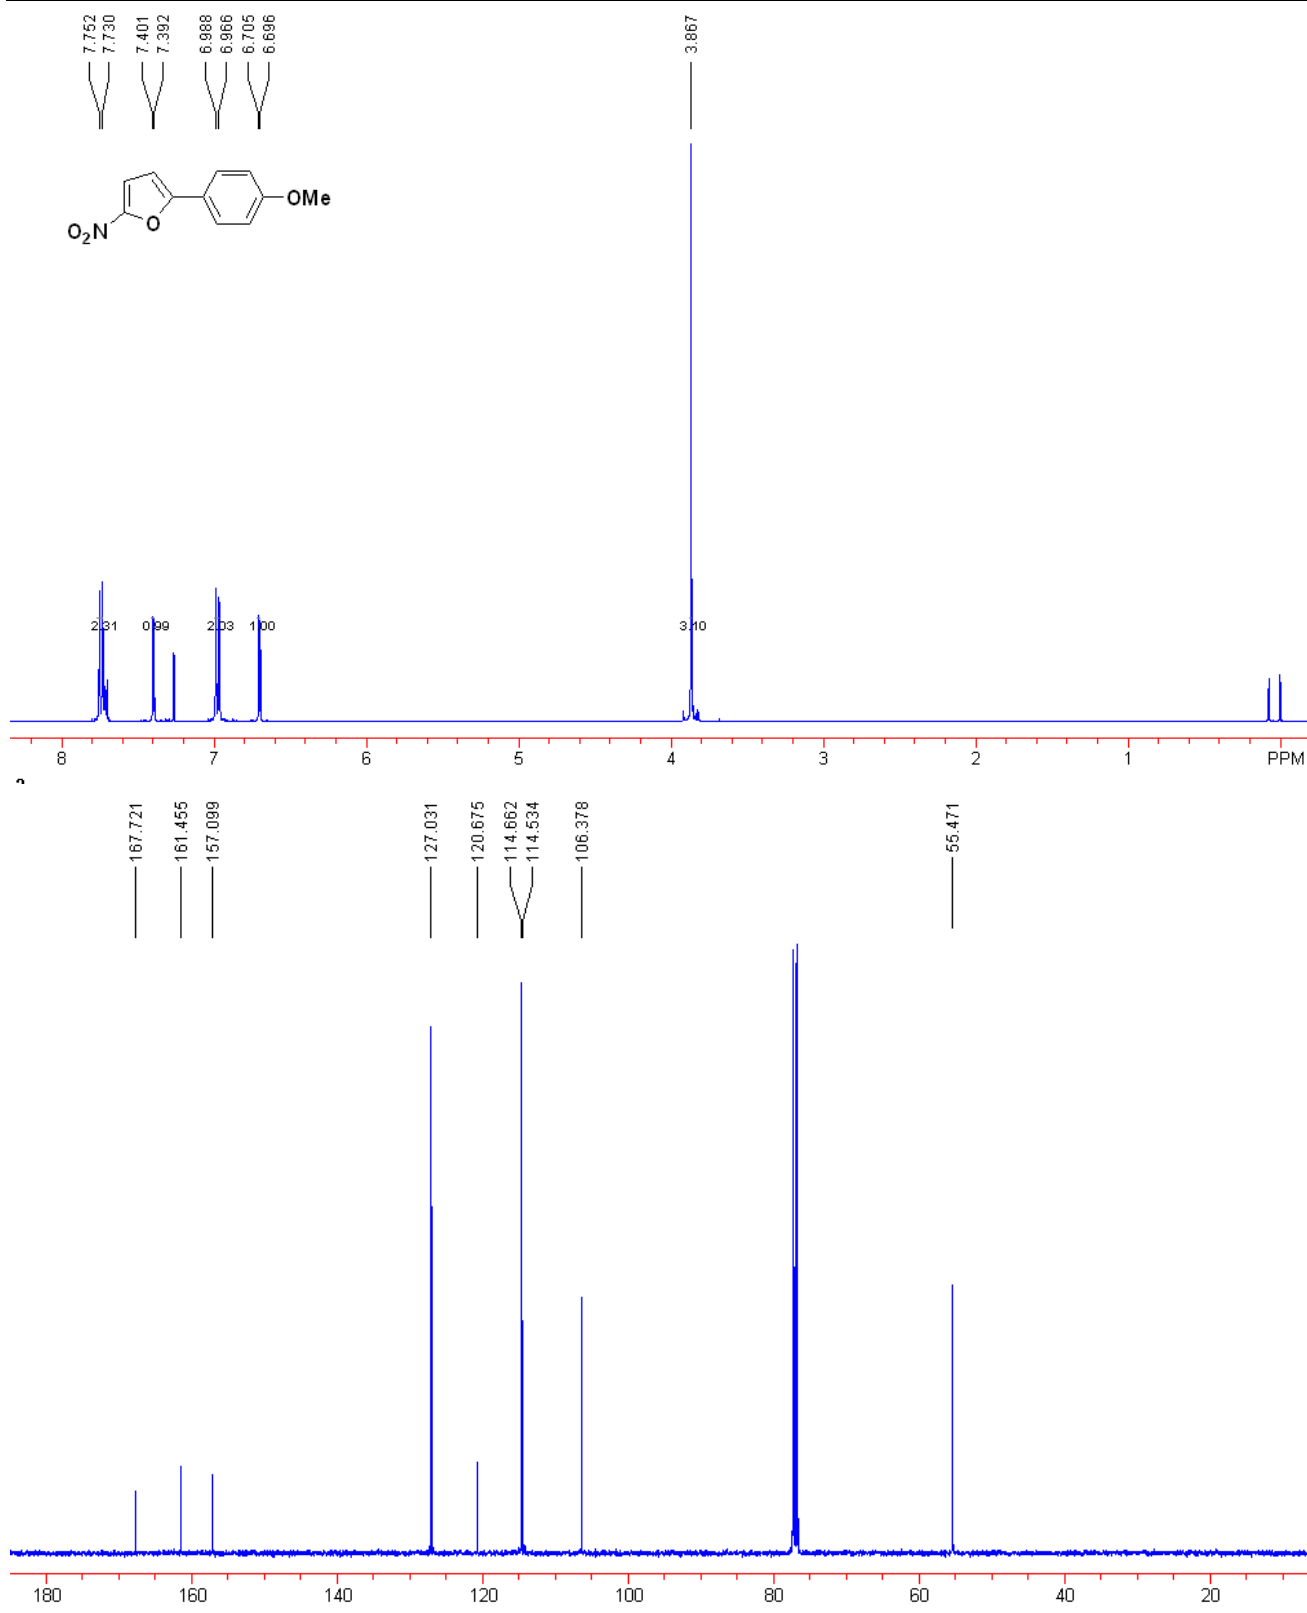

**1-(2'-nitrophenyl-4-yl)ethanone (5j).**

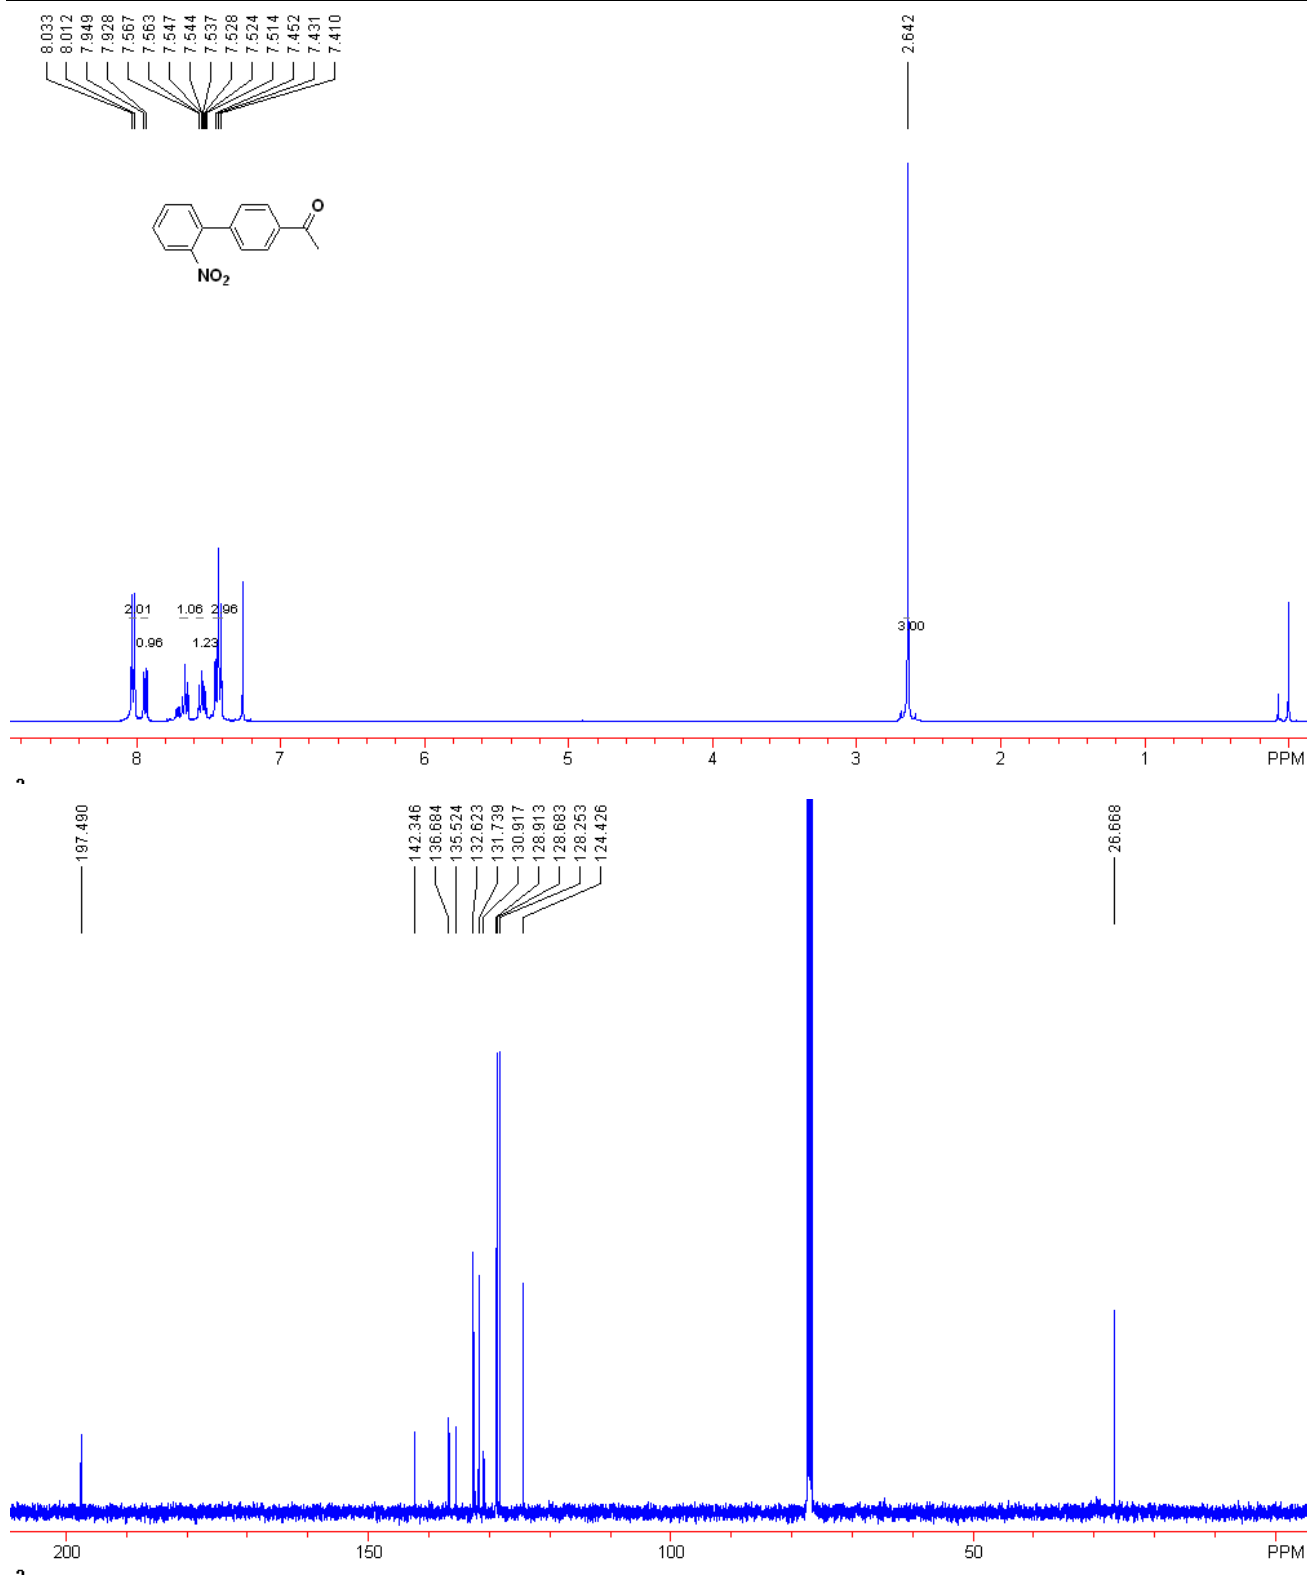

**4,4',5-trimethoxy-2-nitrobiphenyl (5k).**

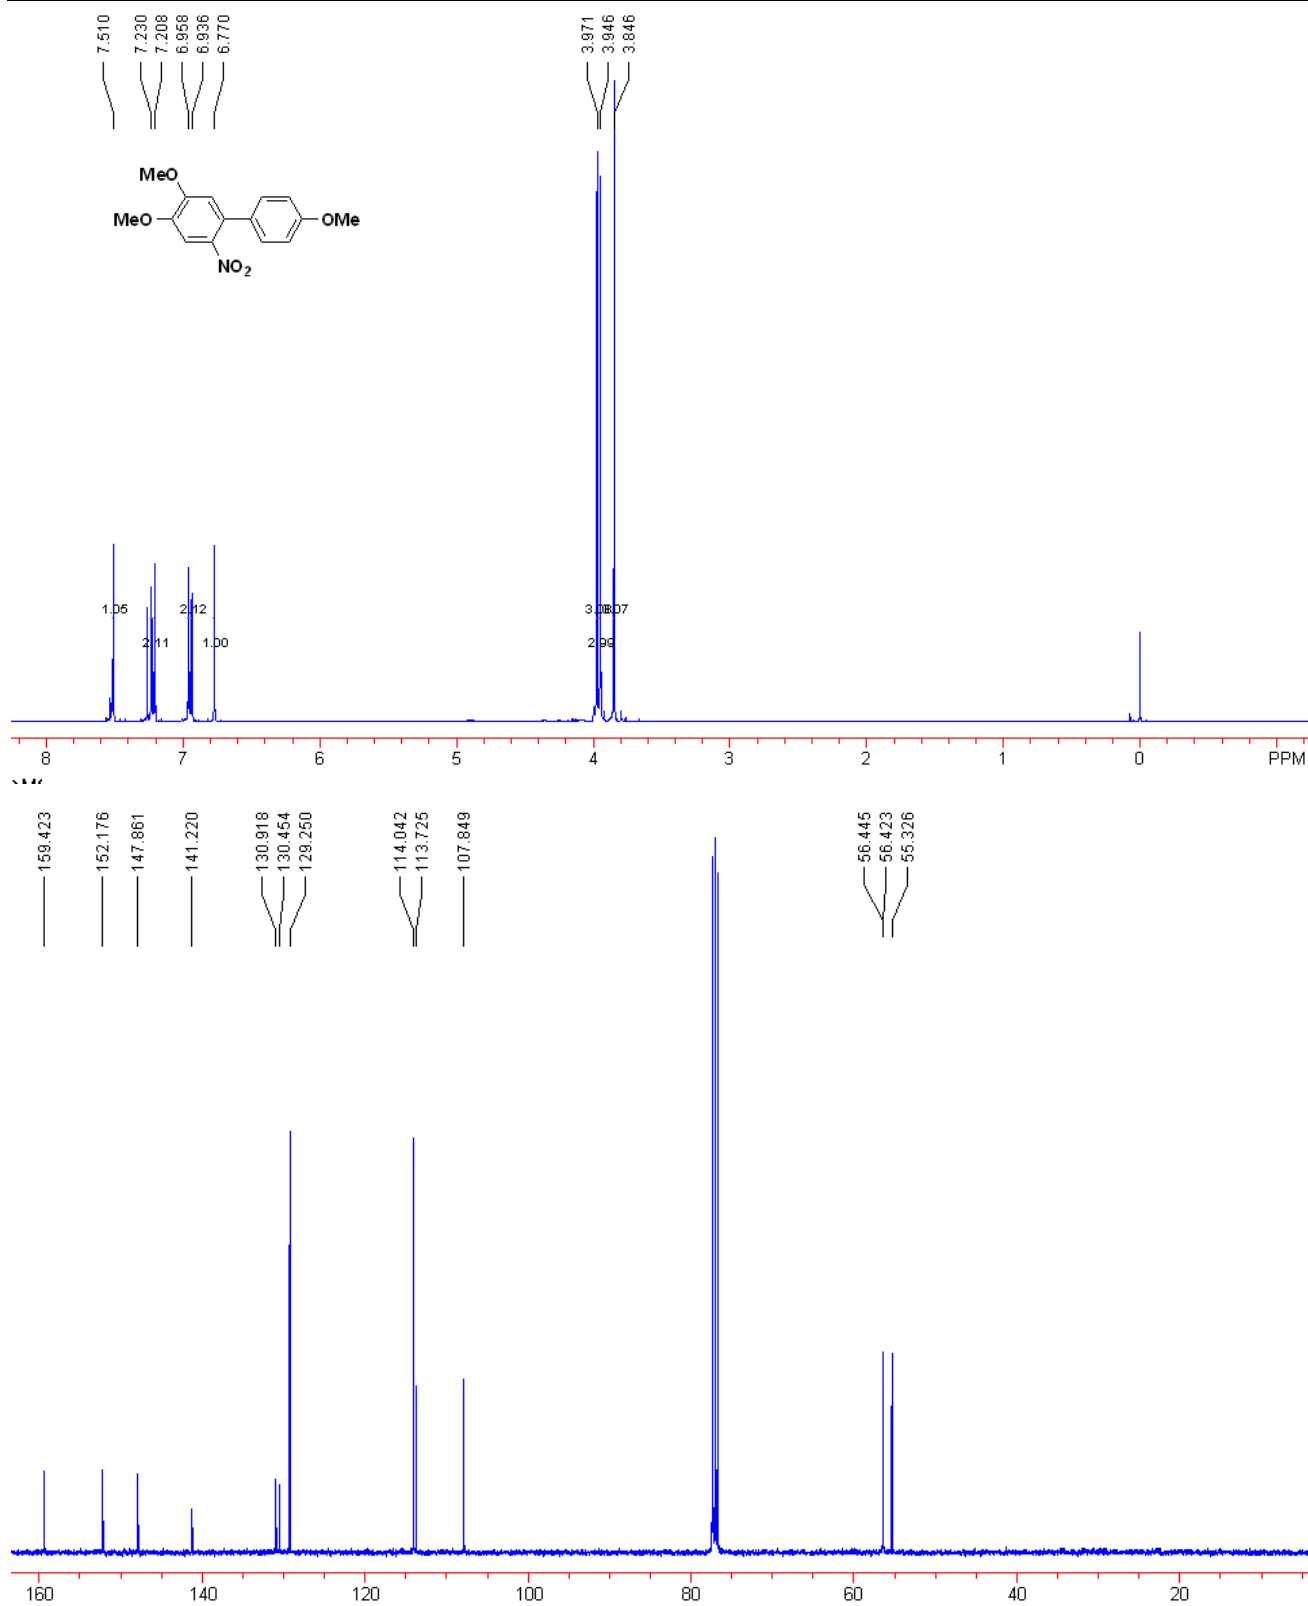

**2,3,4,5,6-pentafluoro-3'-methoxybiphenyl (5I).**

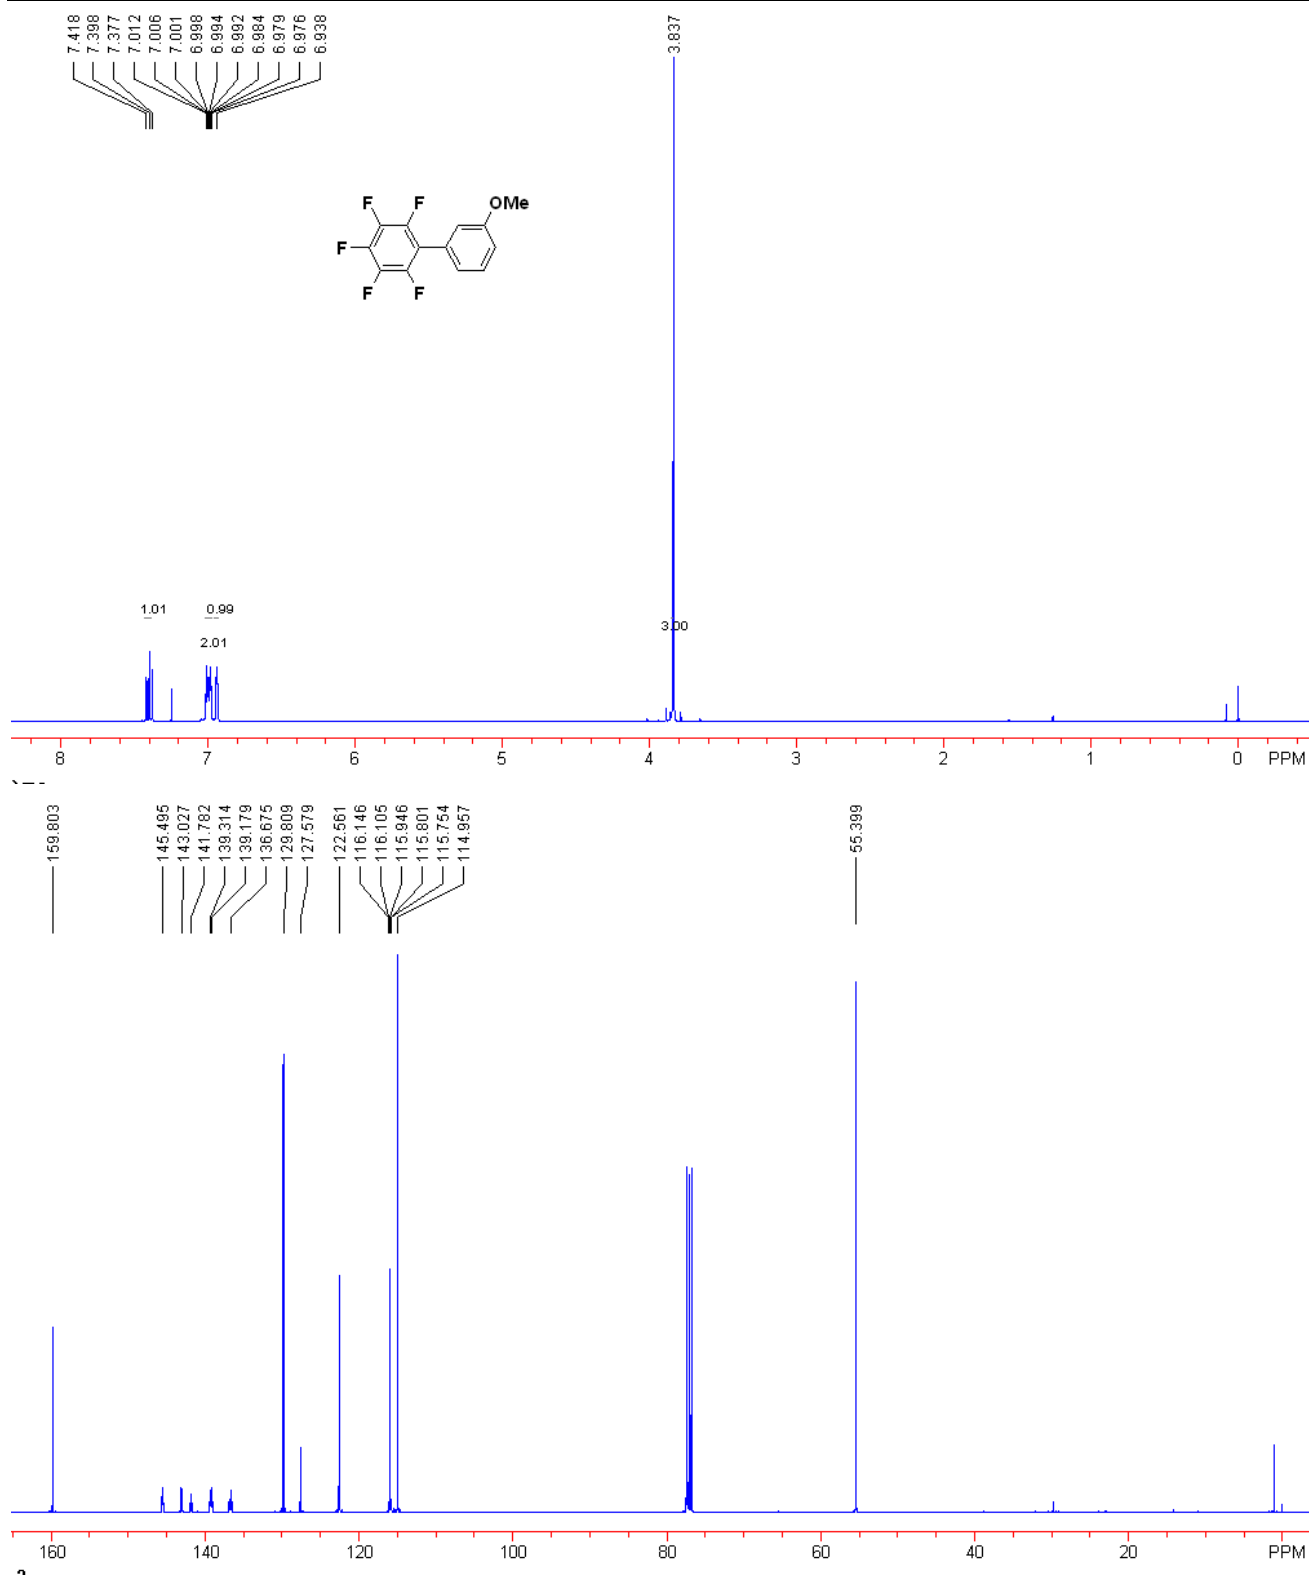

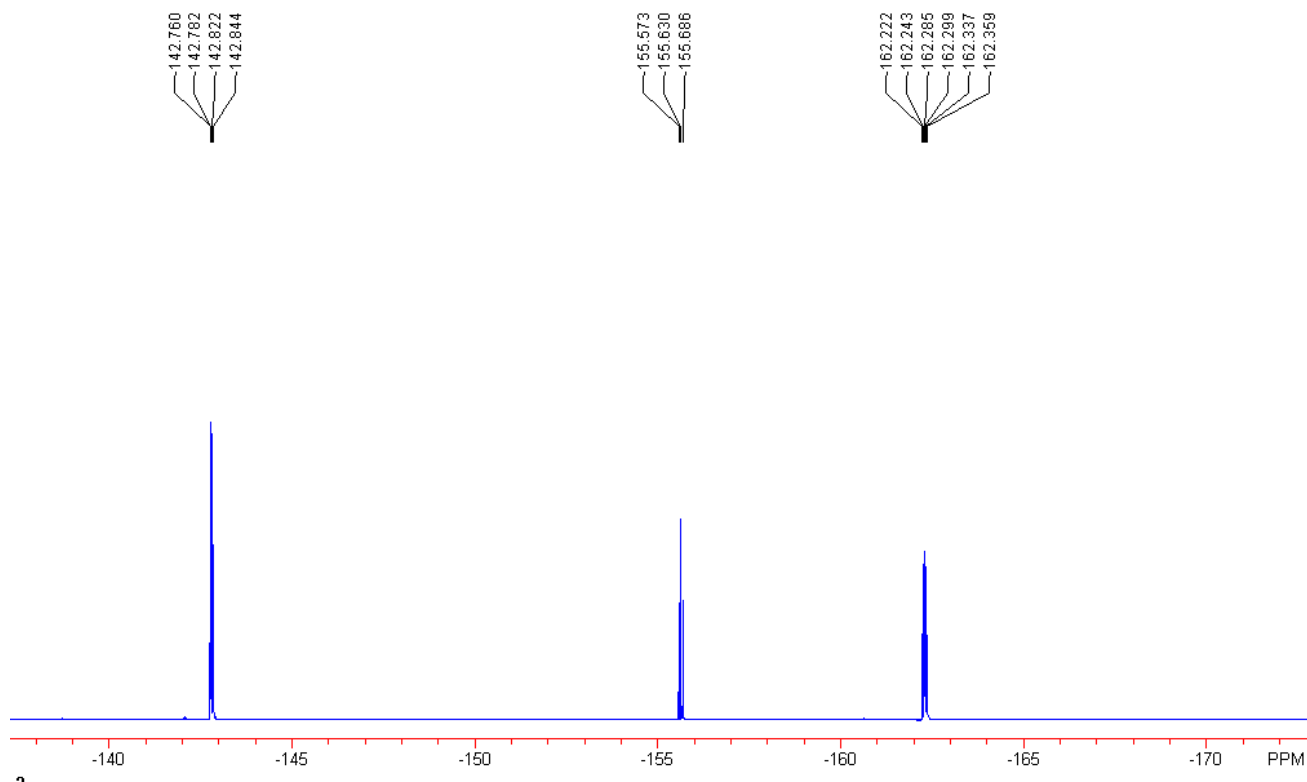

**2,3,4,5,6-pentafluoro-3'-nitrophenyl (5m).**

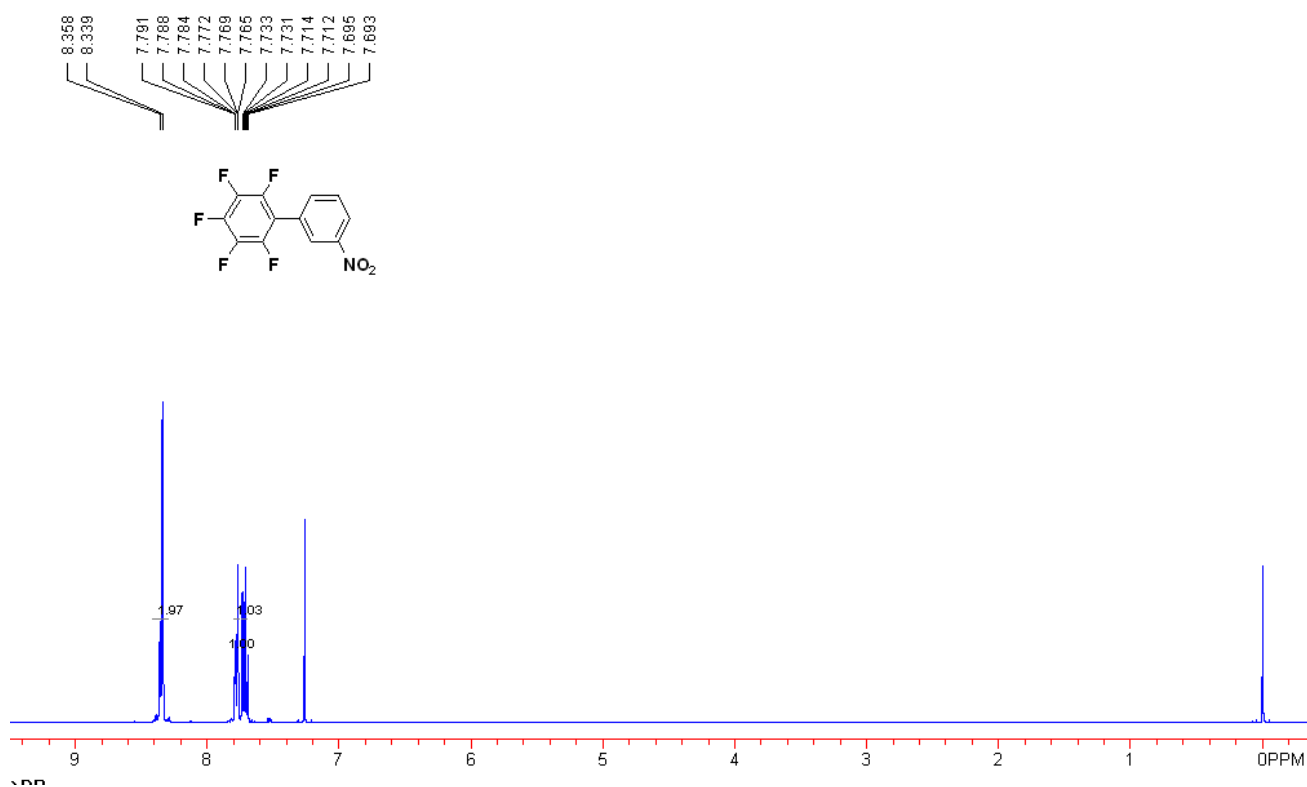

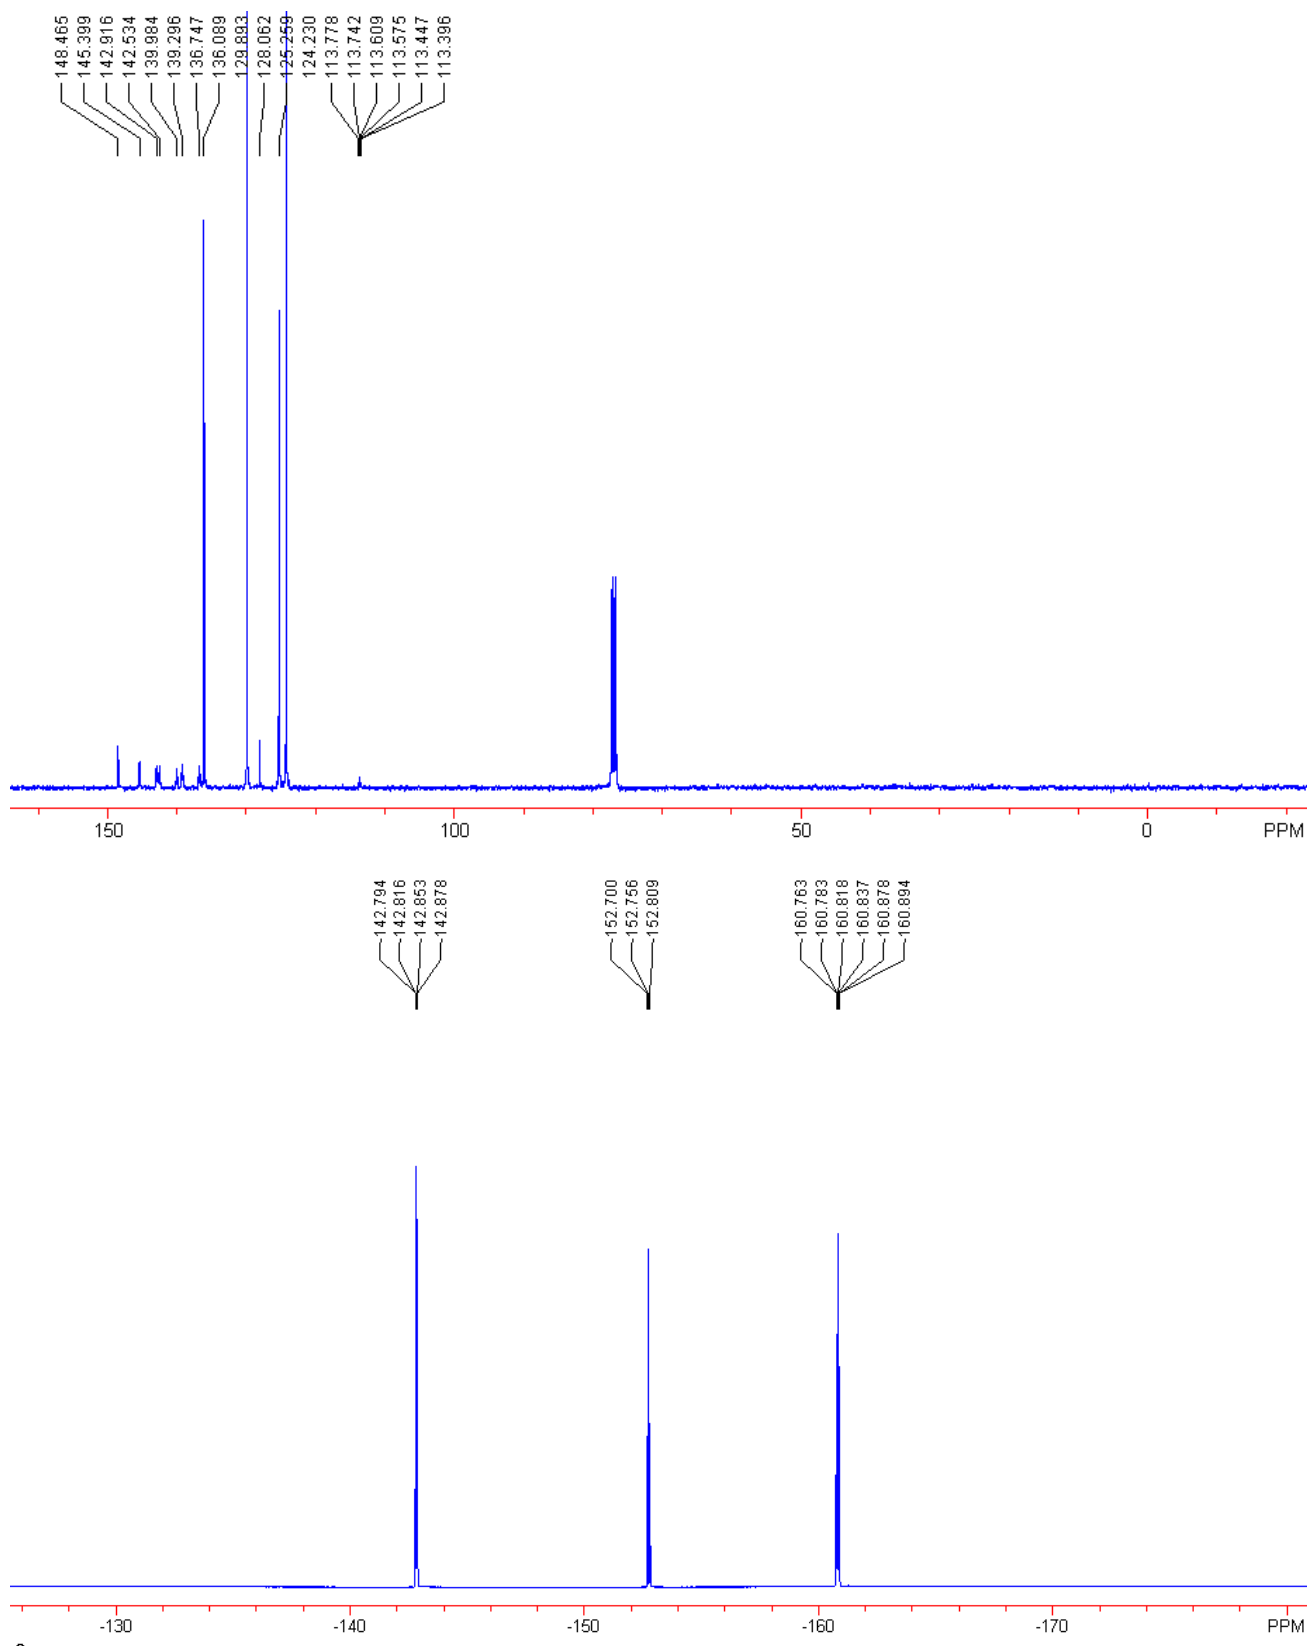

**1-(2',3',4',5',6'-pentafluorobiphenyl-4-yl)ethanone (5n).**

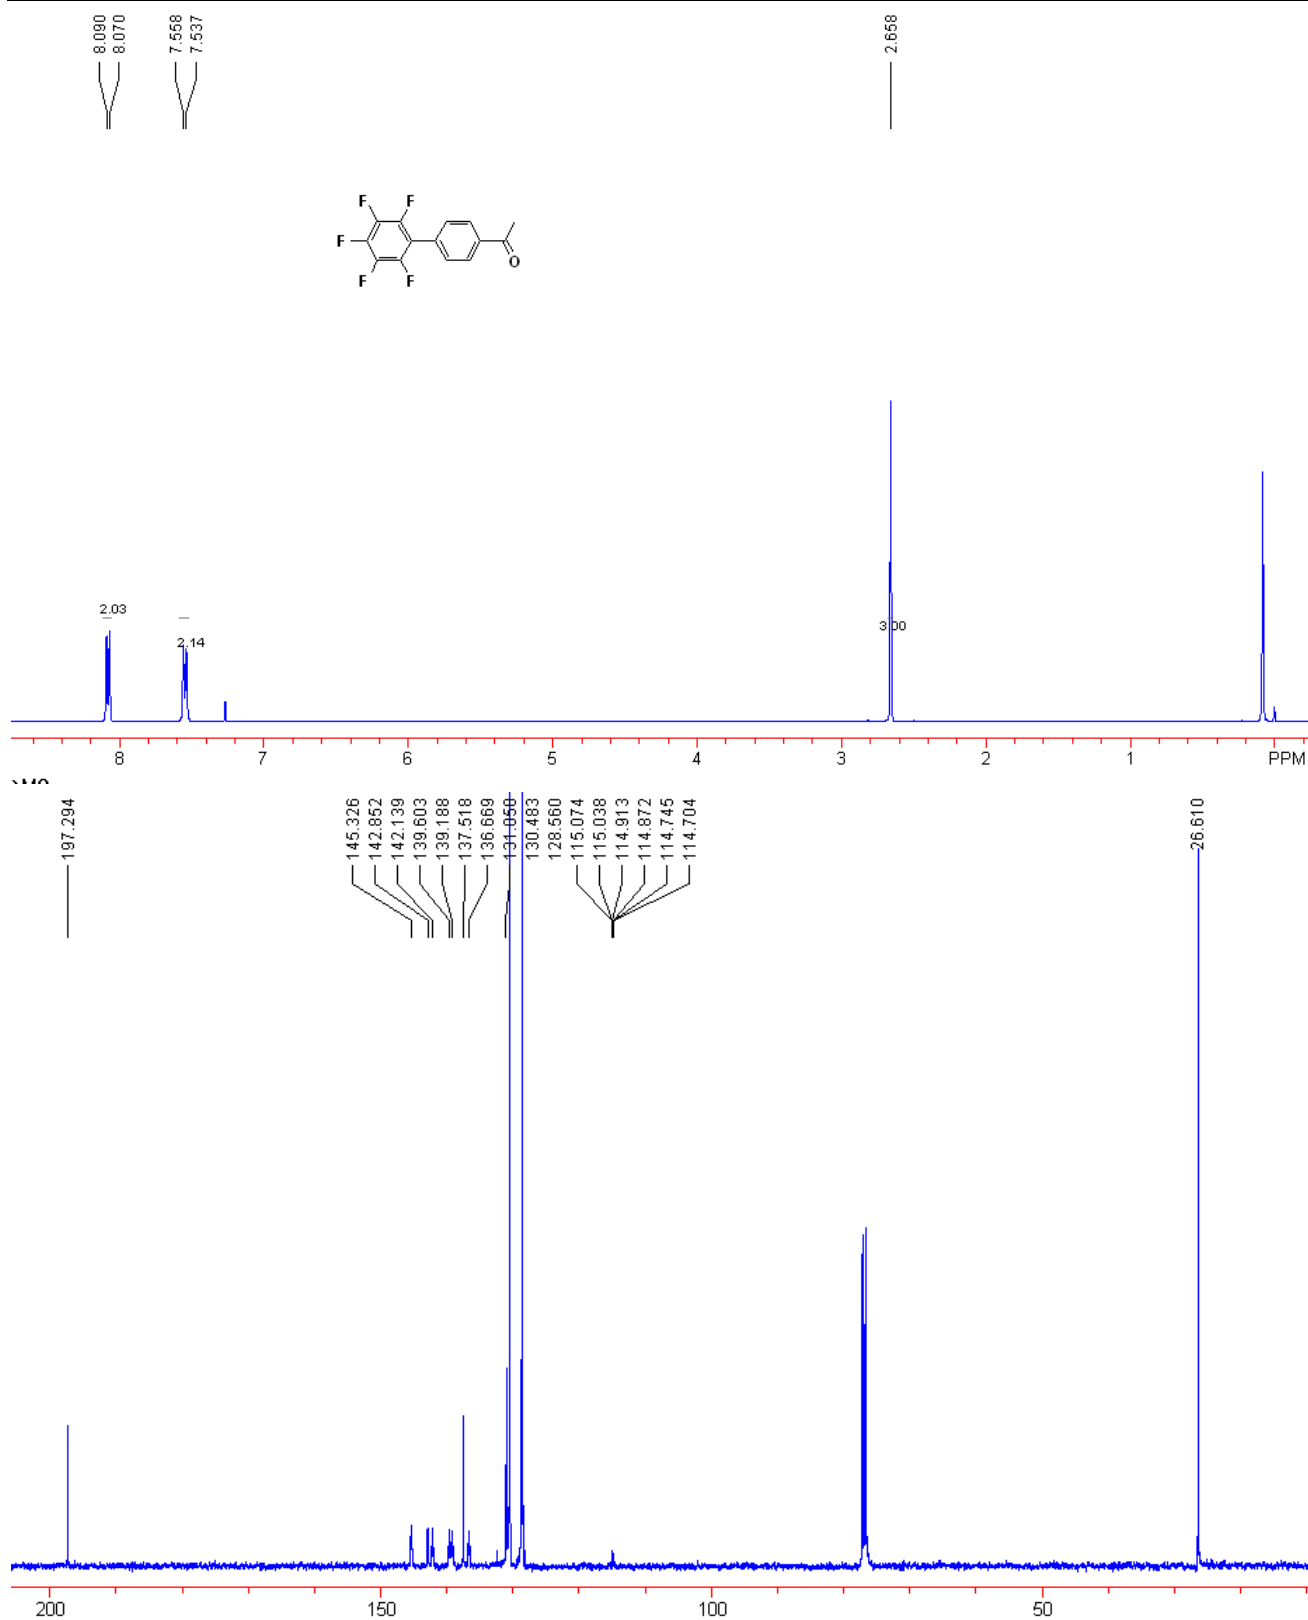

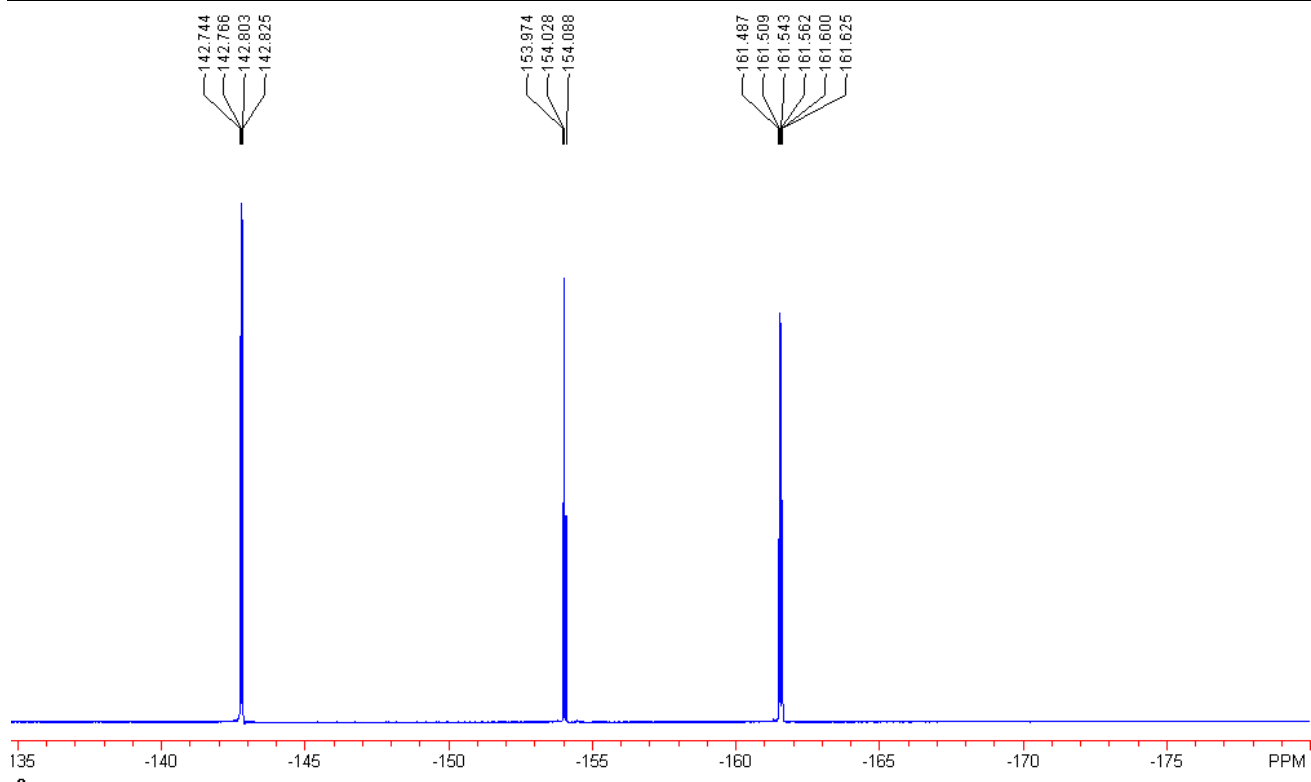

**2',3',4',5',6'-pentafluorobiphenyl-4-carbonitrile (50).**

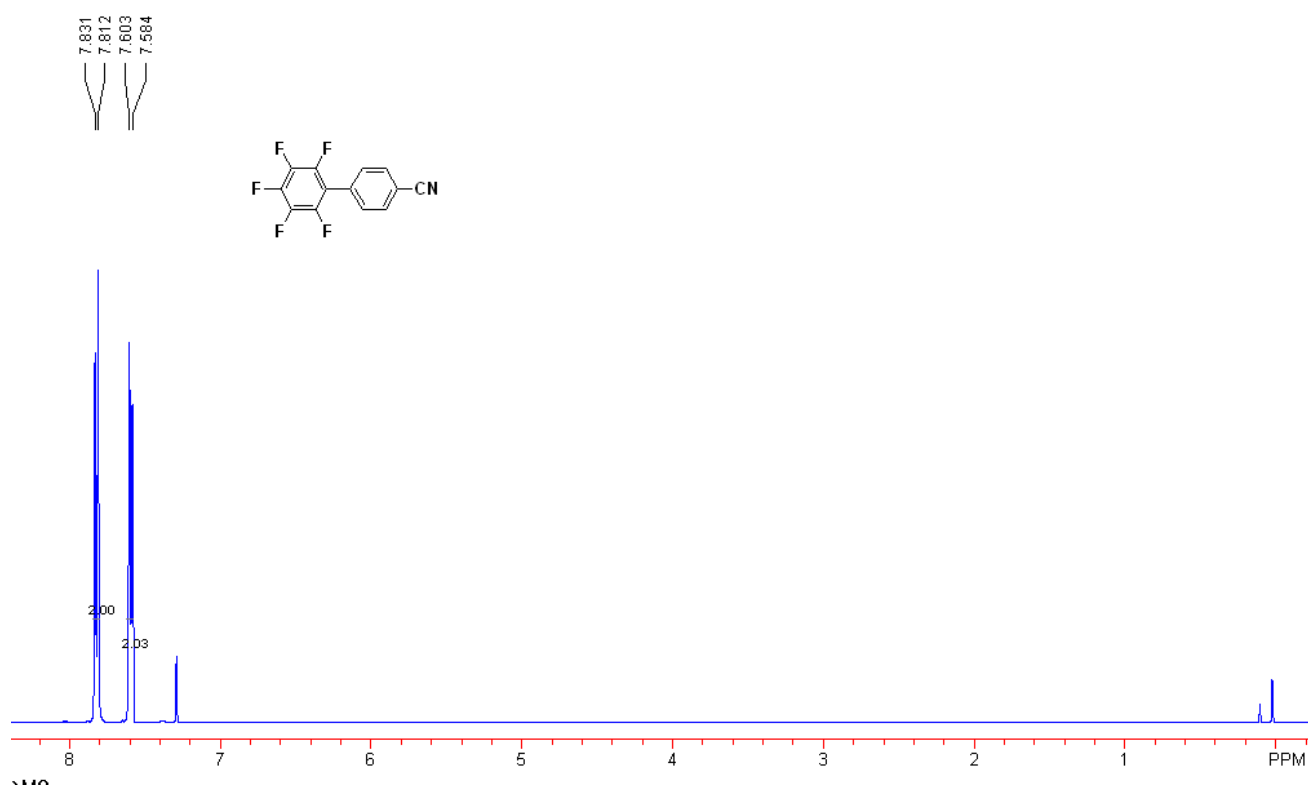



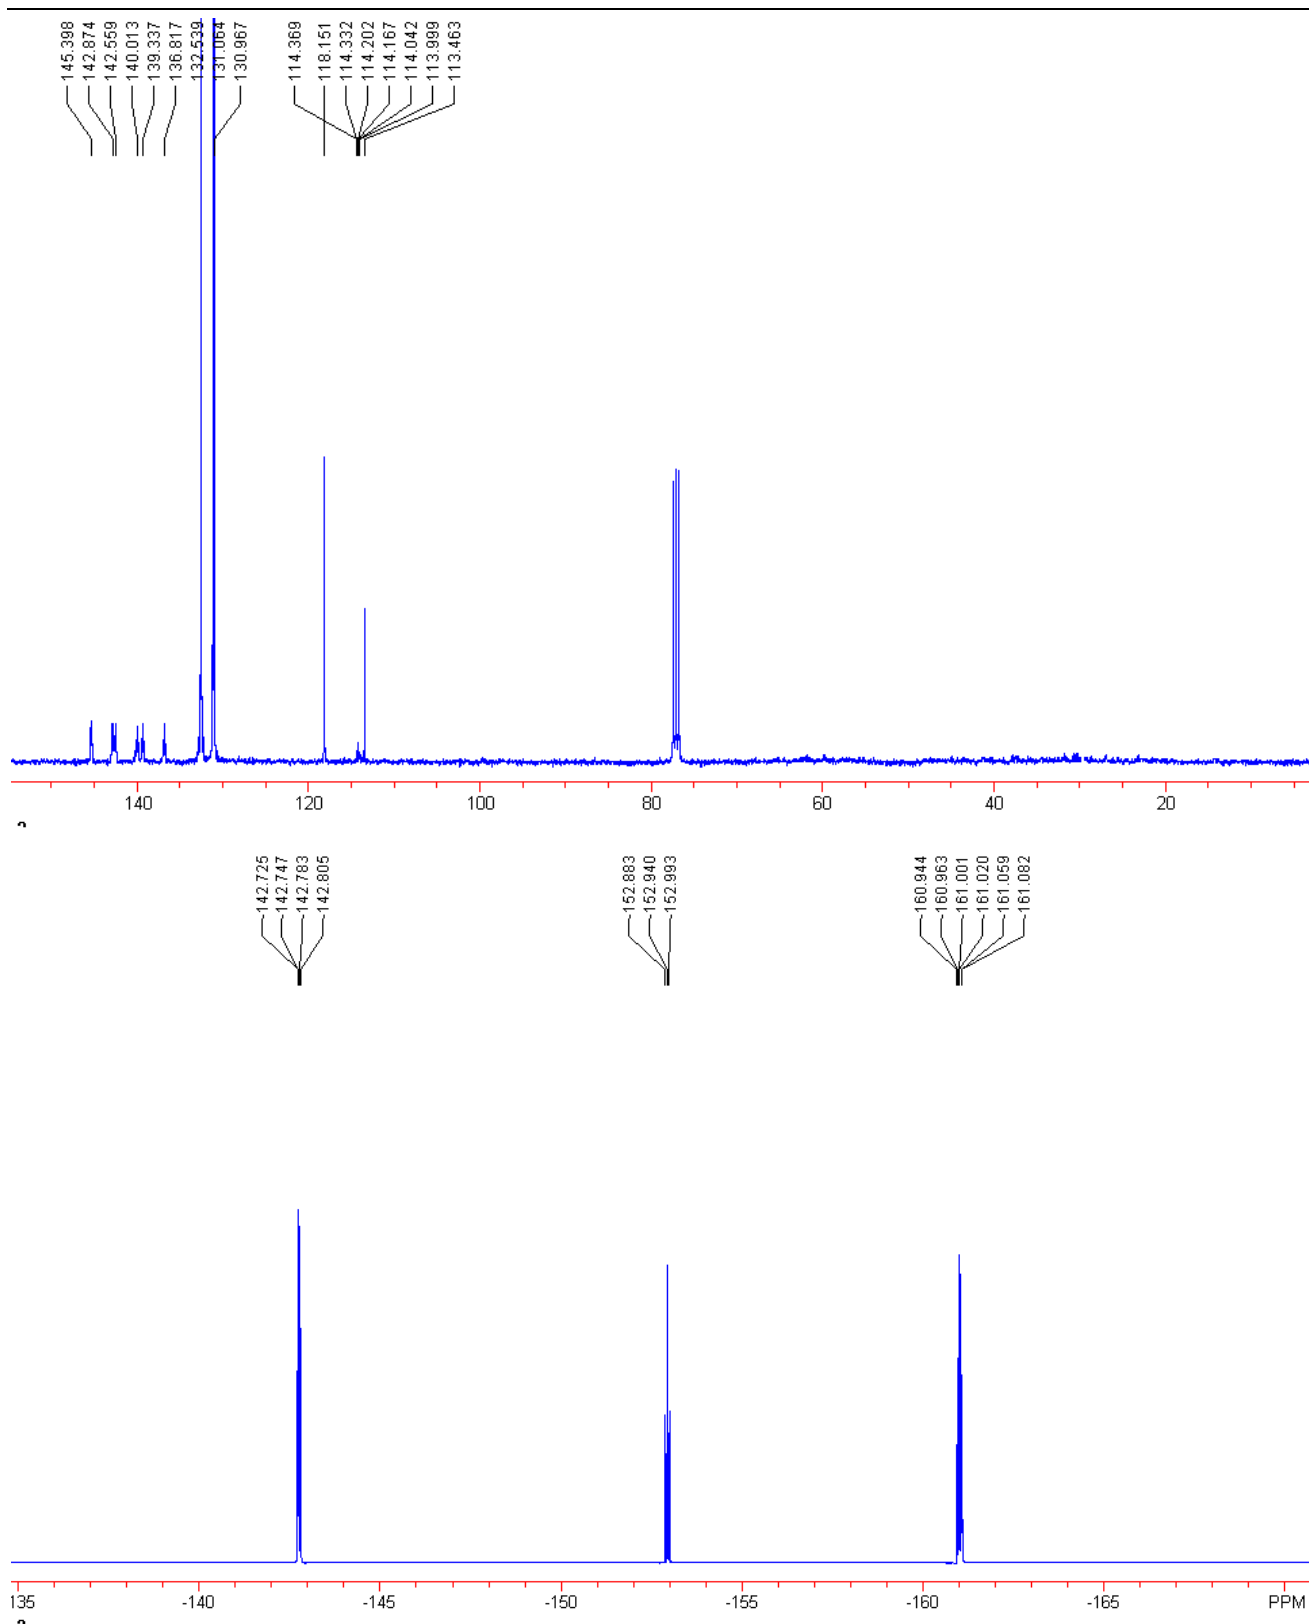

**1-(2',6'-difluorobiphenyl-4-yl)ethanone (5p).**

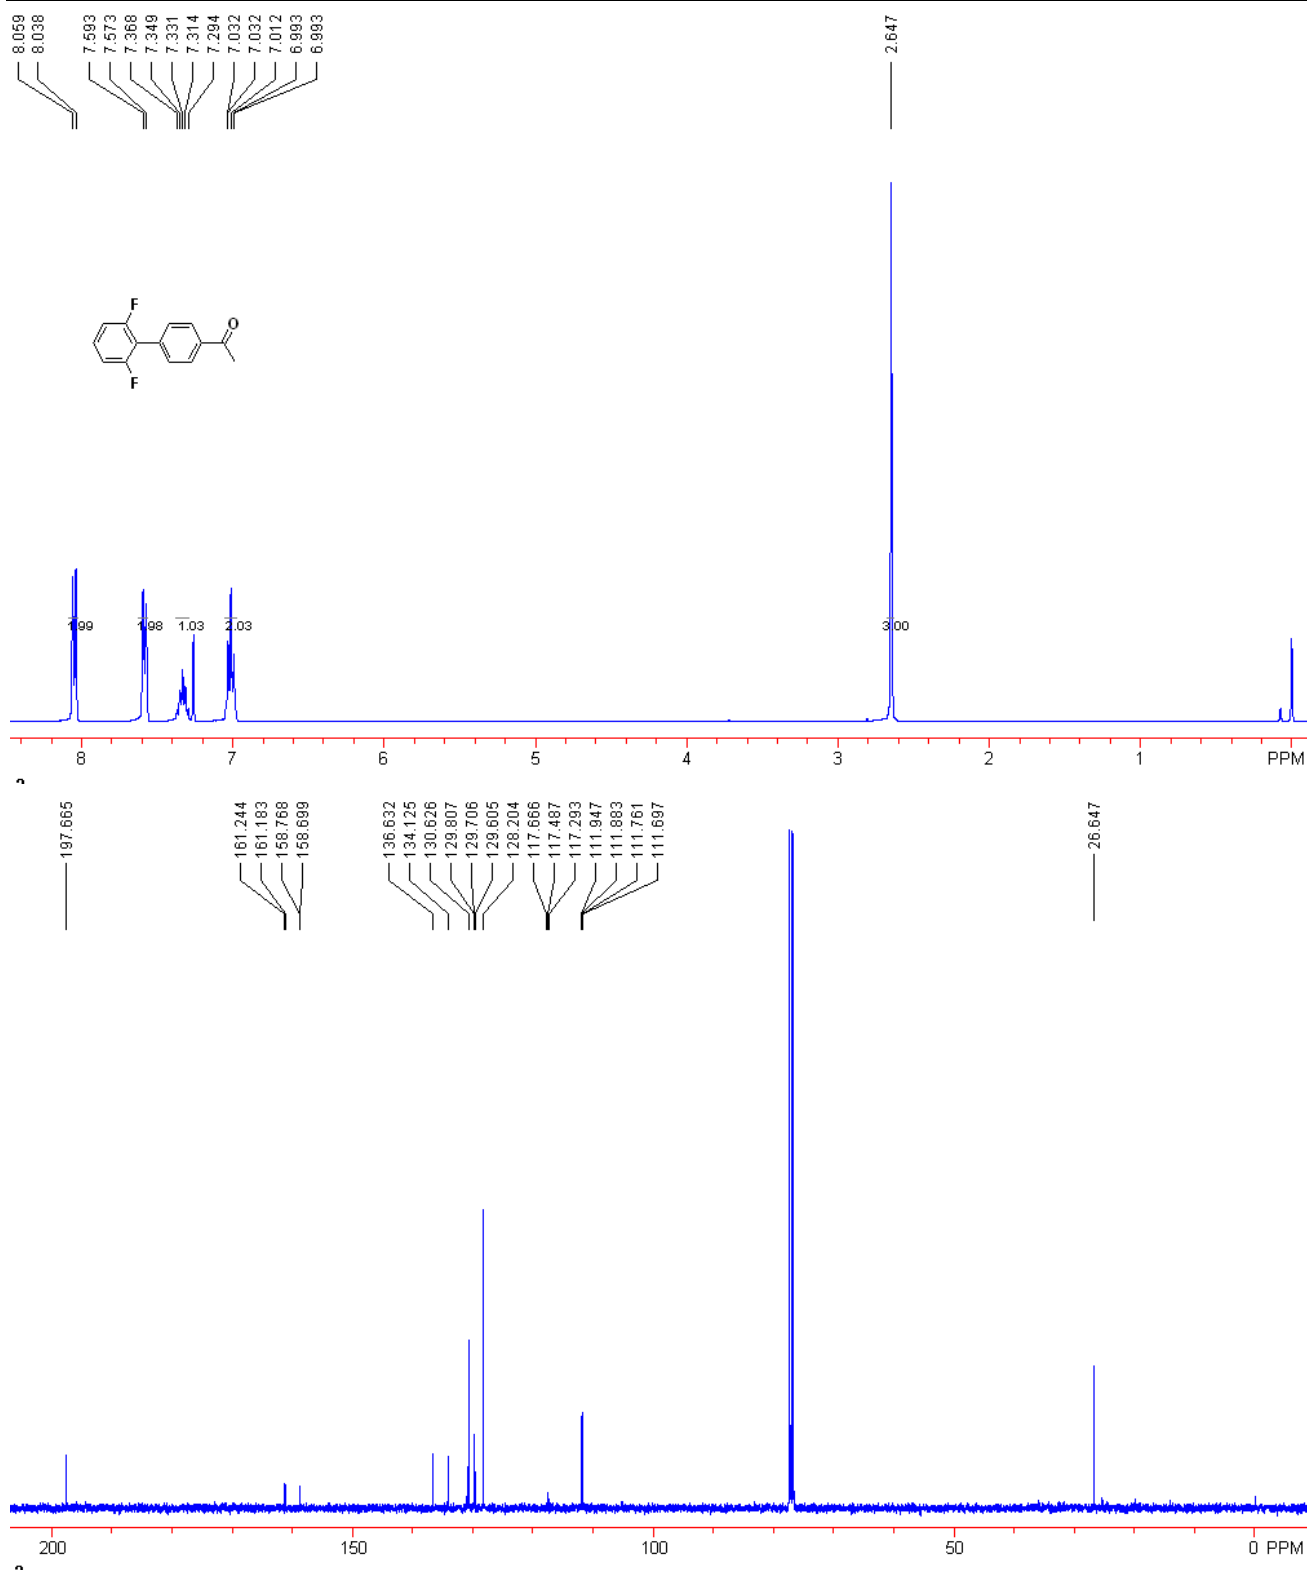

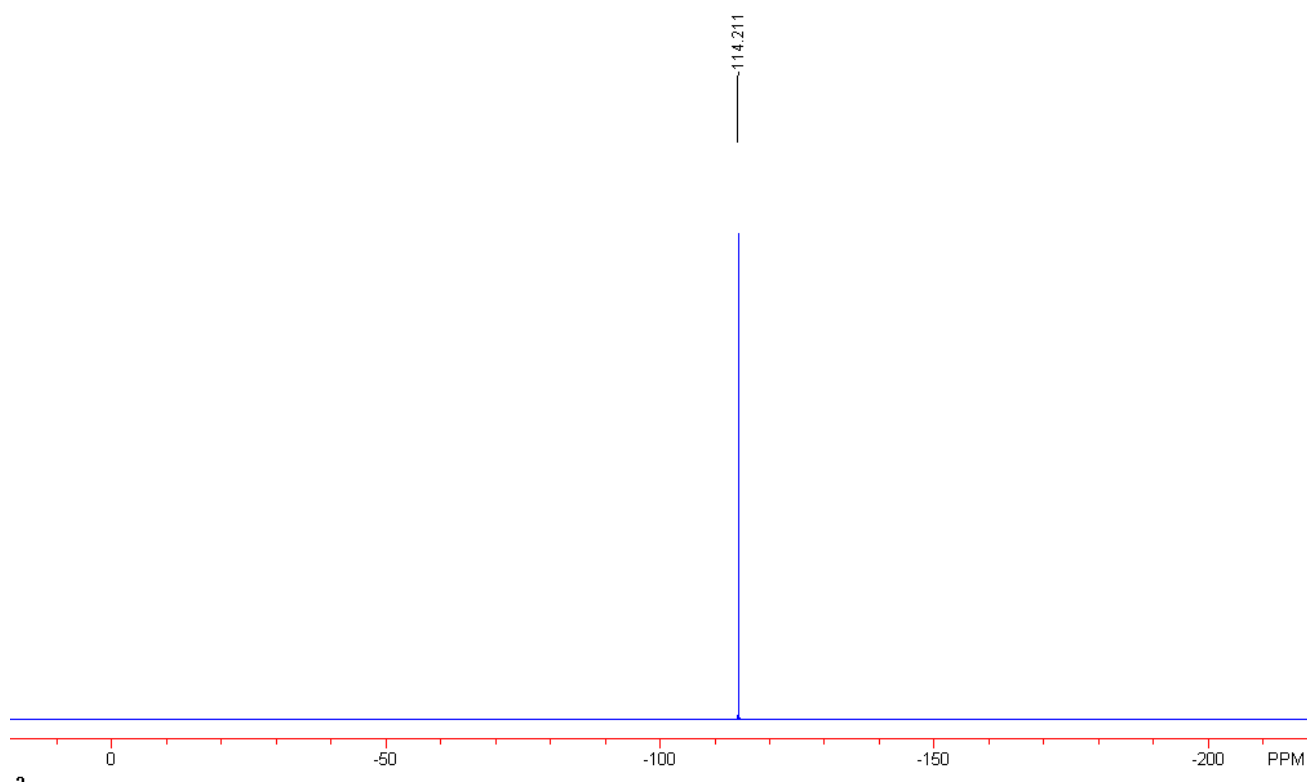

**2,6-difluoro-4'-methoxybiphenyl (5q).**

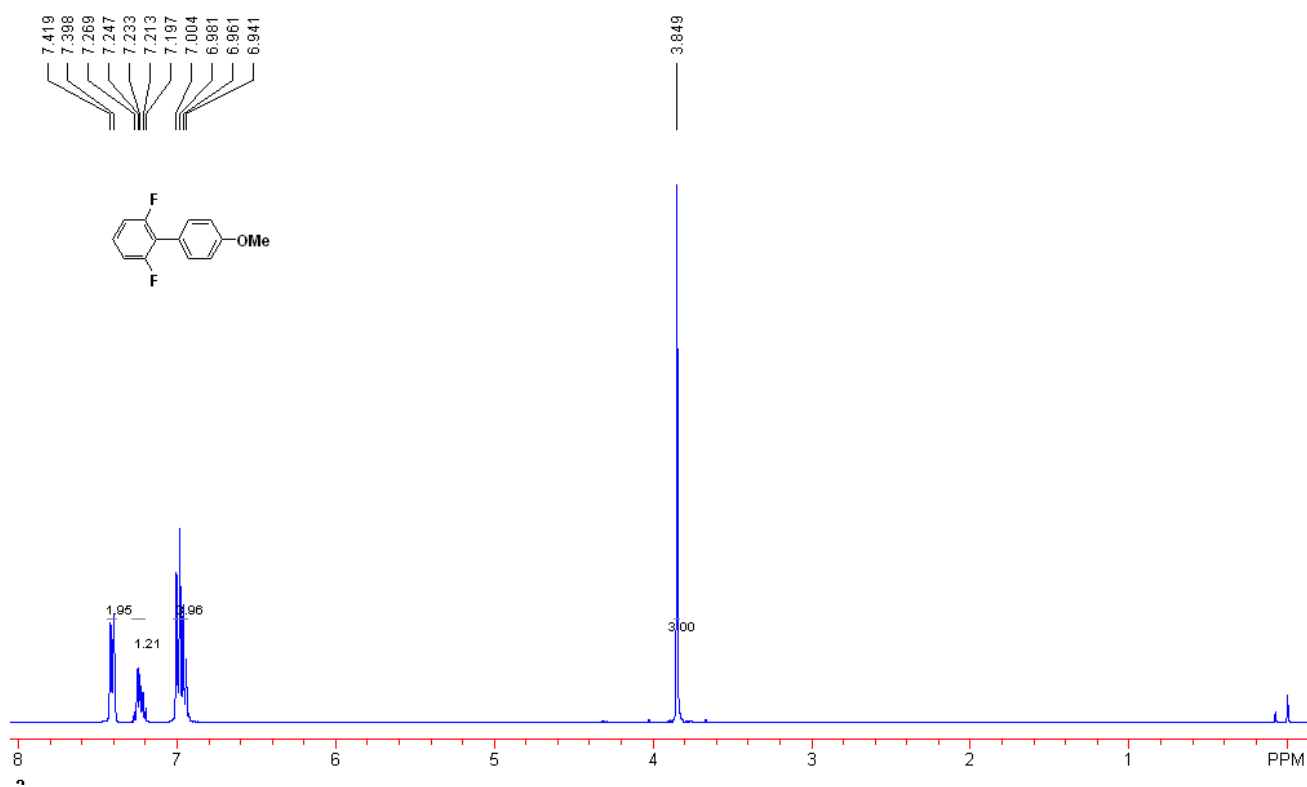

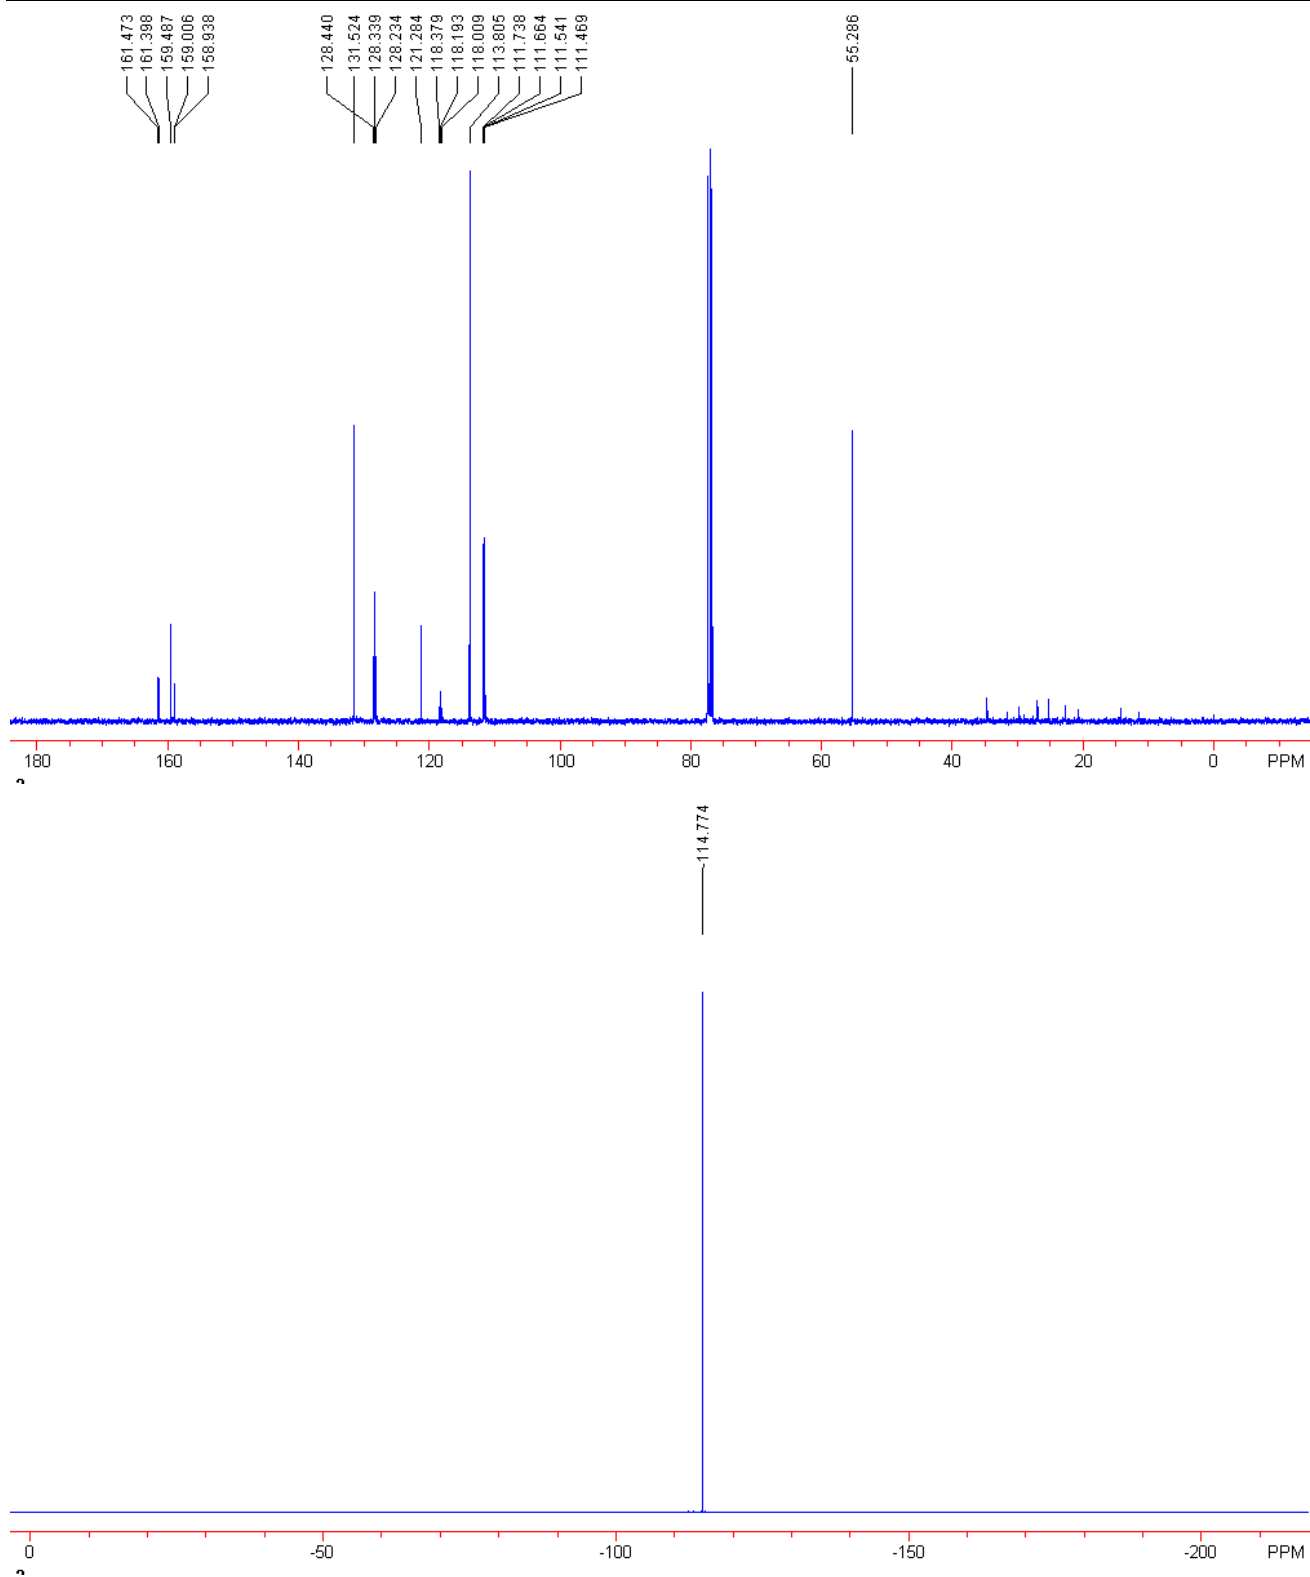

**2',4',6'-trifluorobiphenyl-4-carbonitrile (5r).**

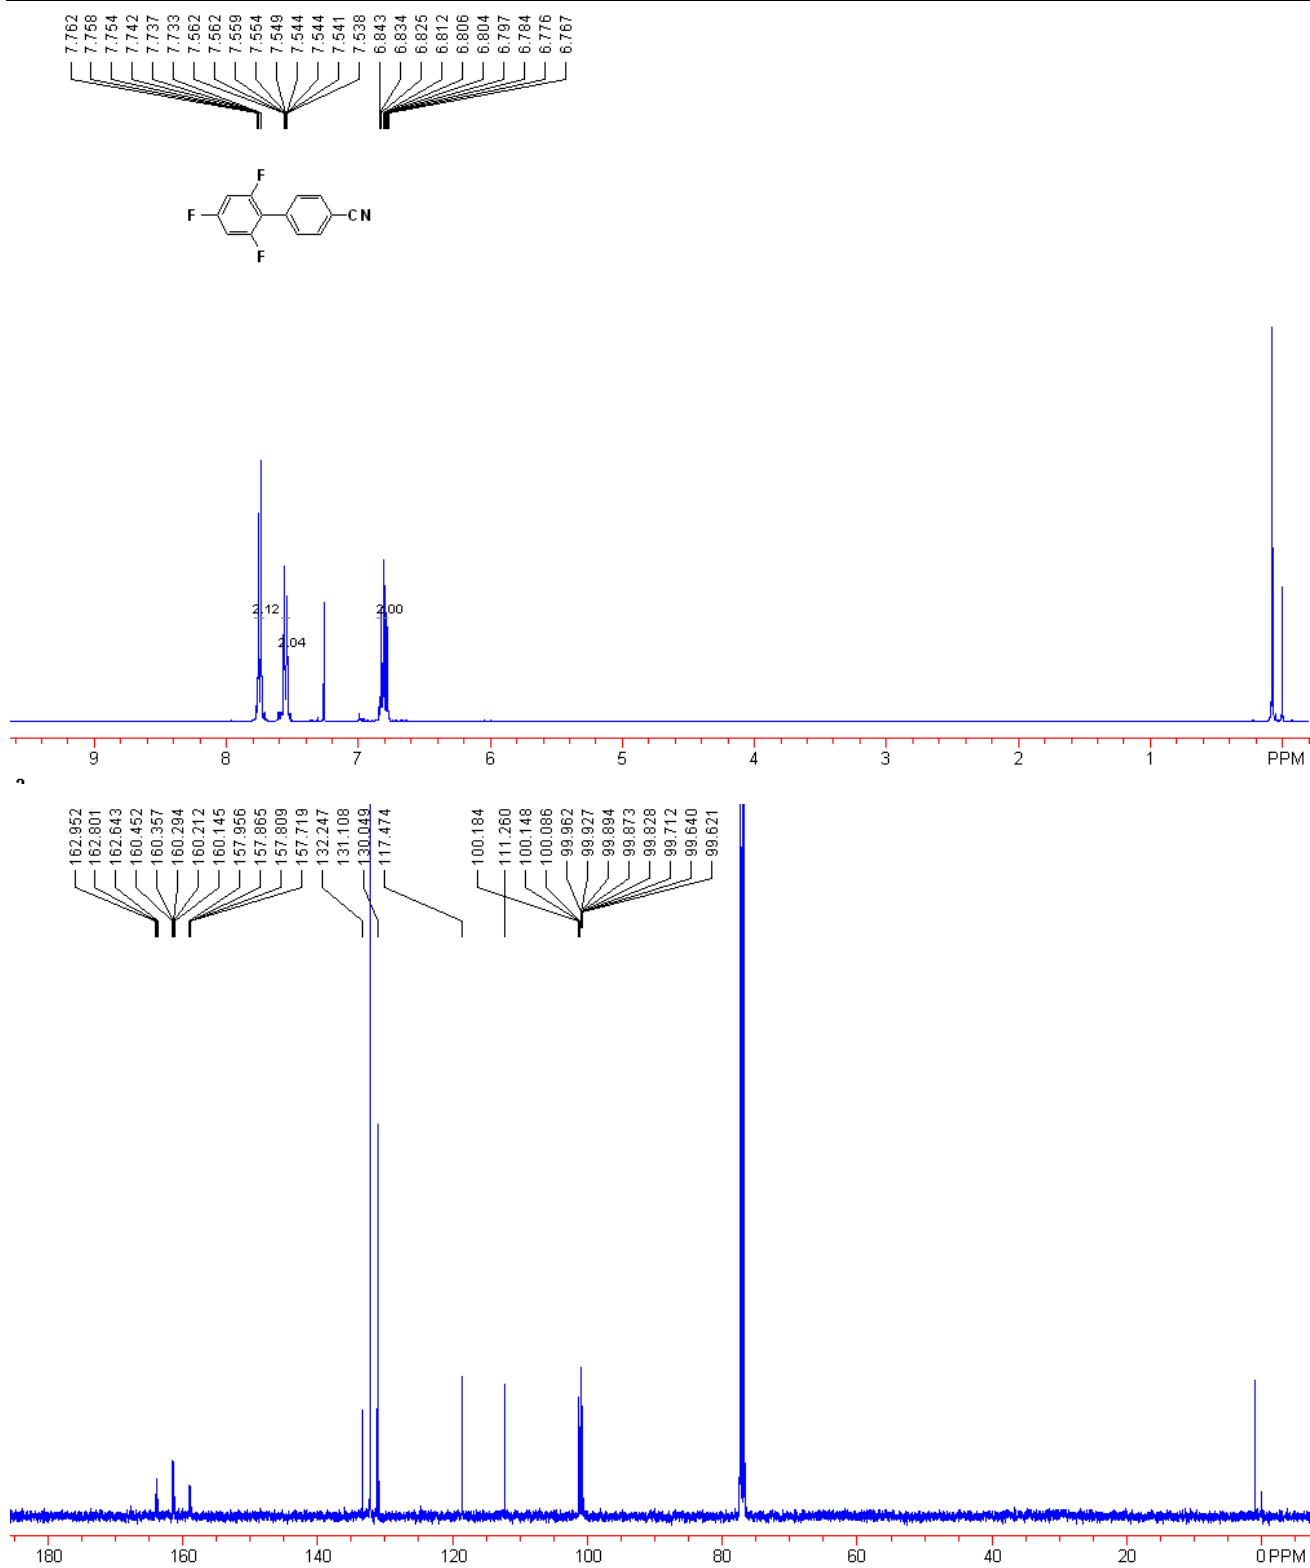

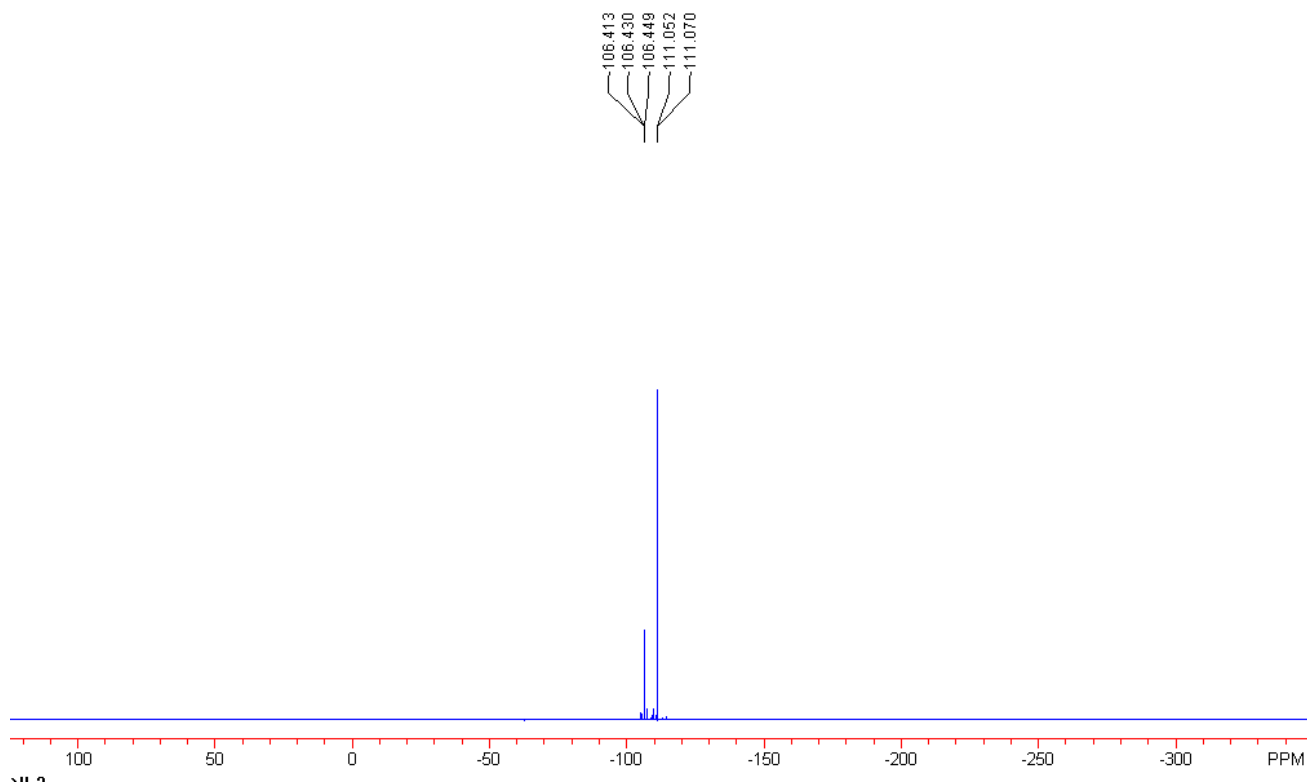

**2,3,4,5-tetrafluoro-4'-methoxybiphenyl (5s).**

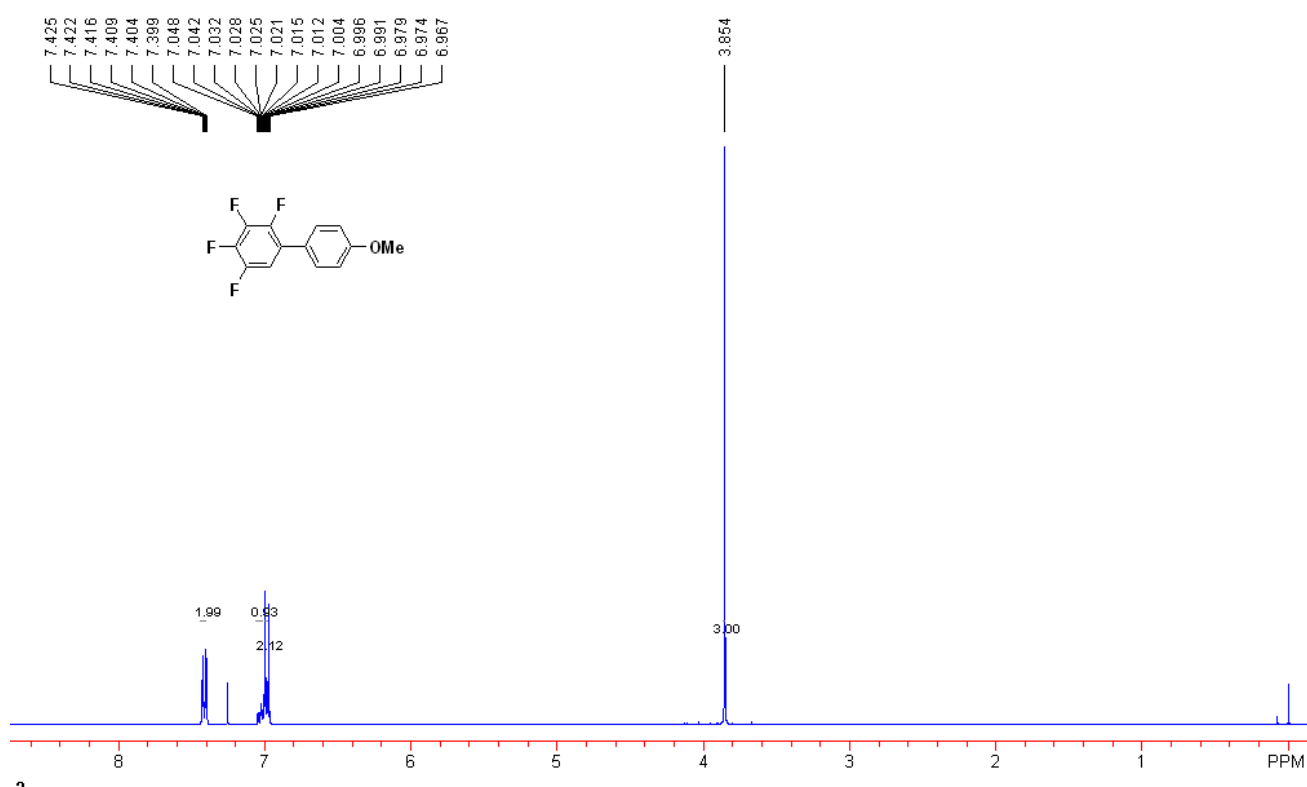

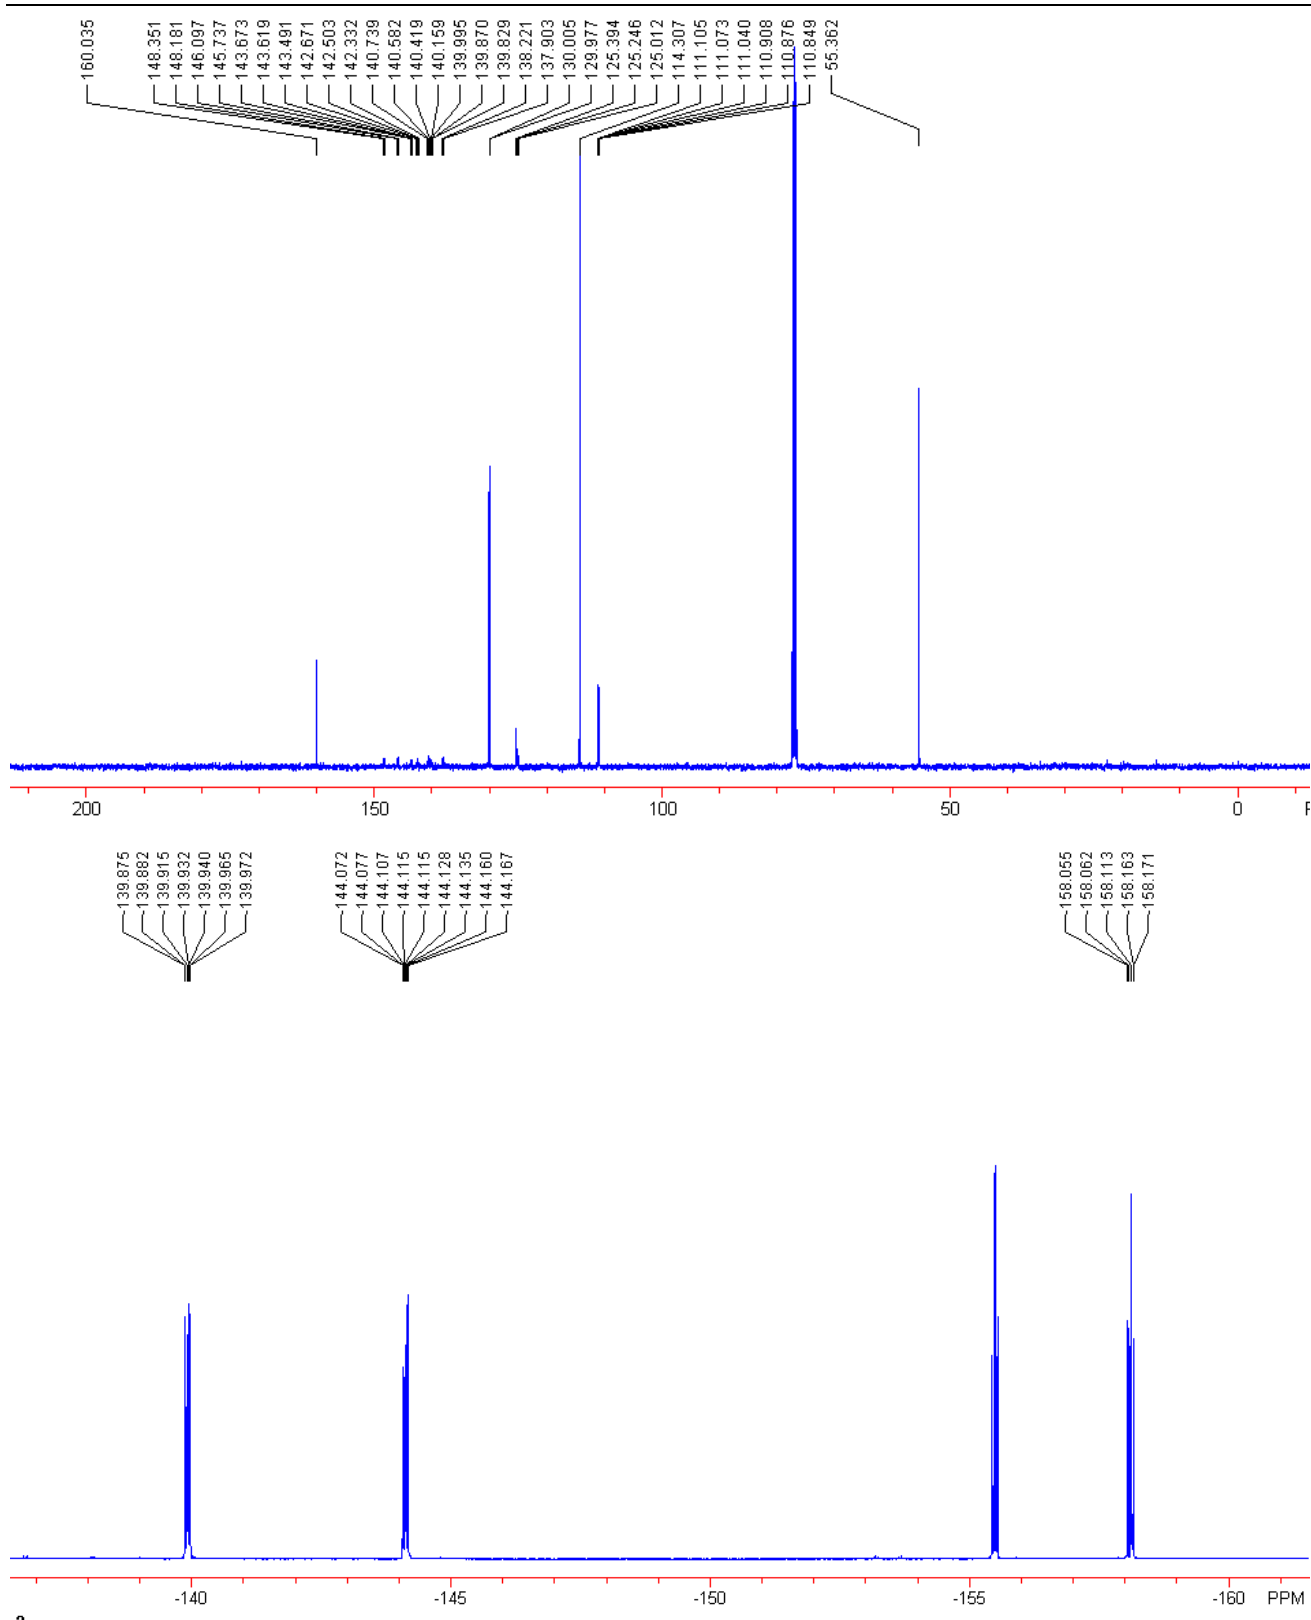

**2,3,6-trifluoro-4'-methoxybiphenyl (5t).**

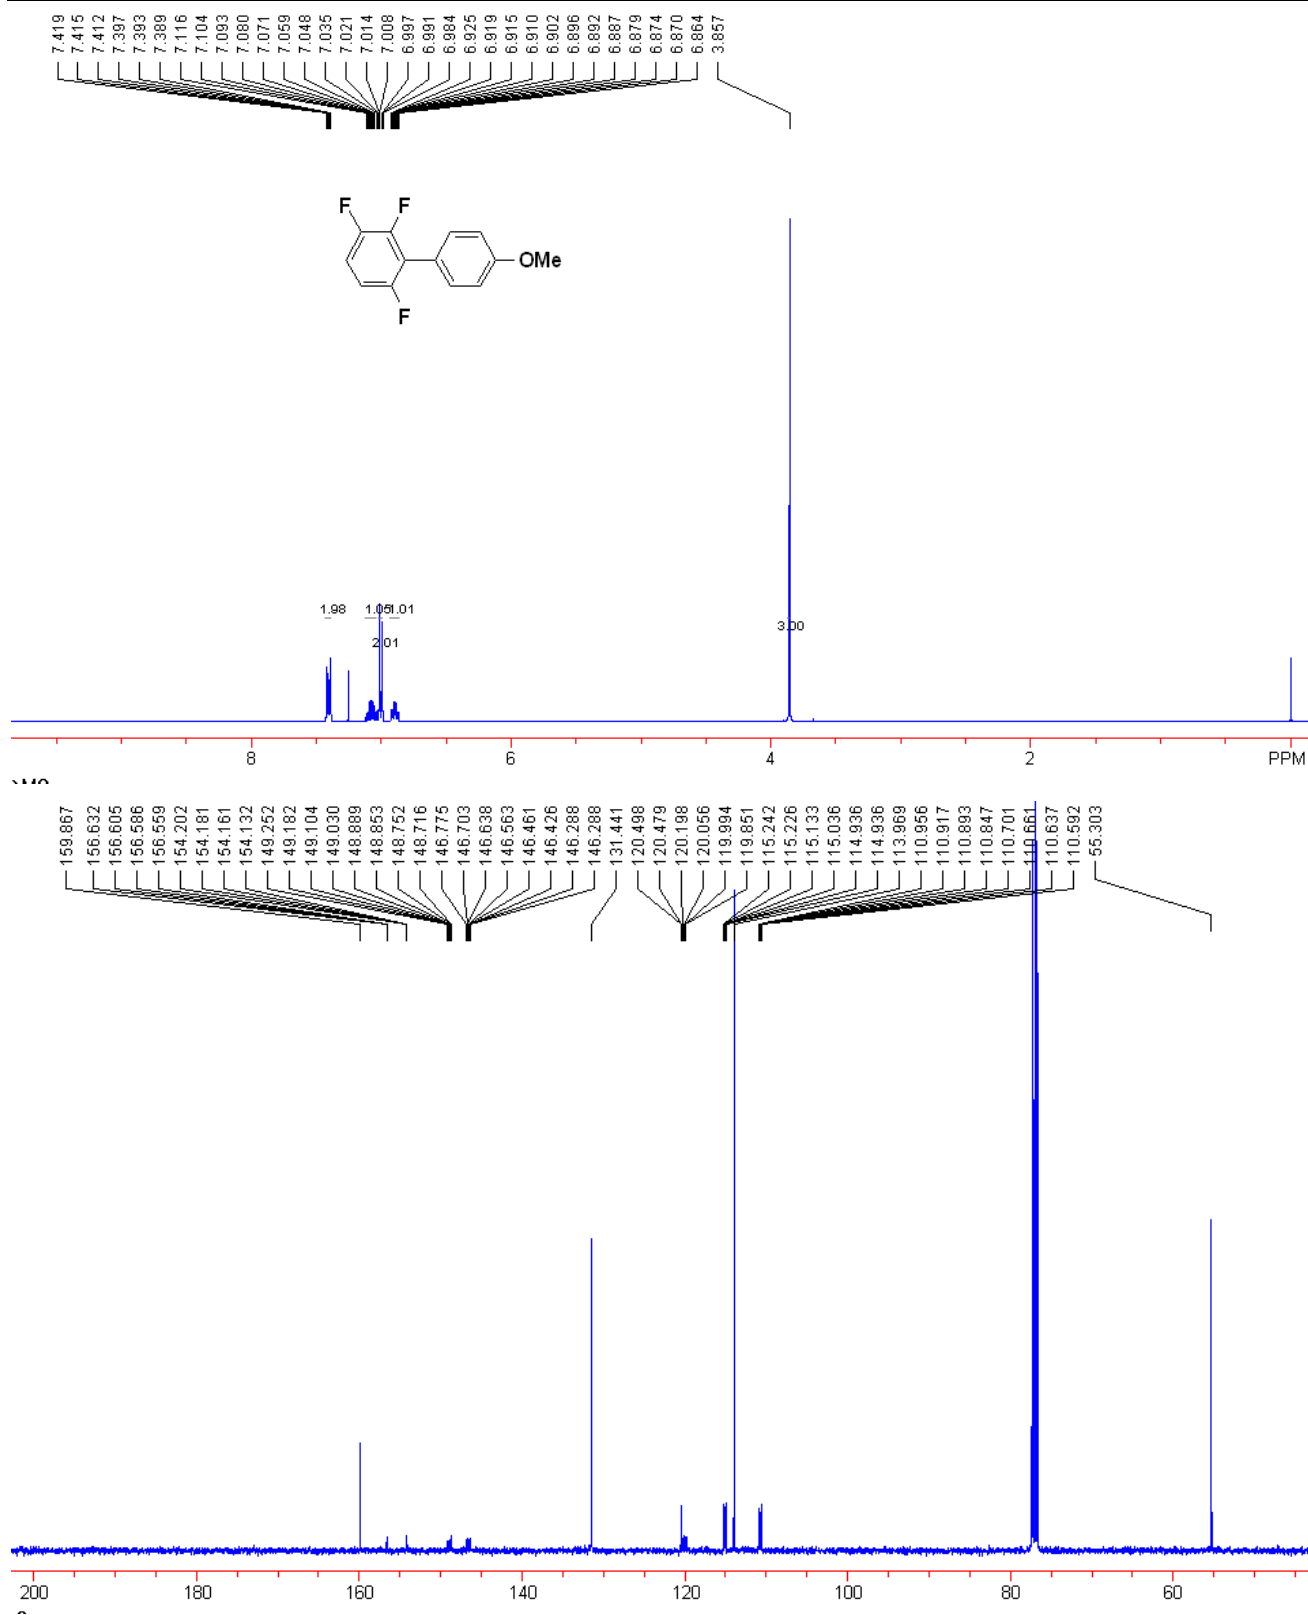



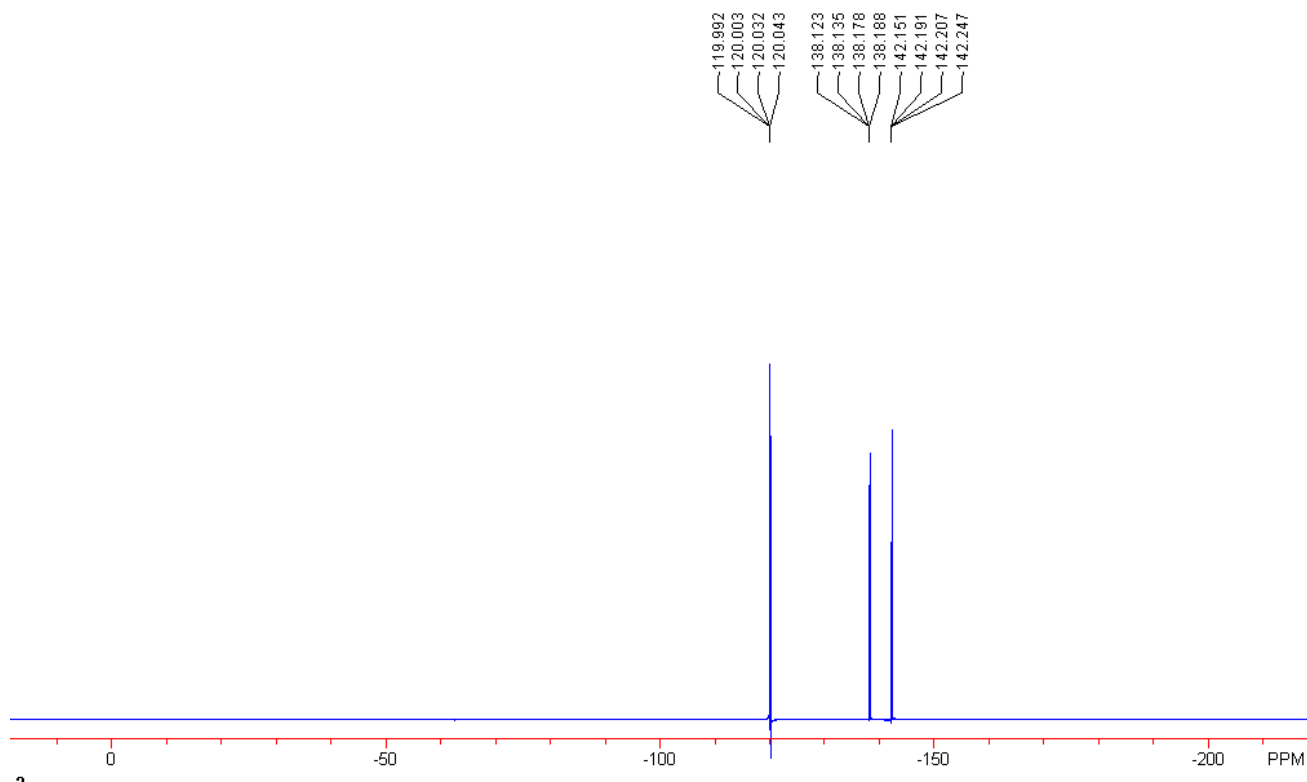

**Ethyl 2',3',5',6'-tetrafluoro-4'-methylbiphenyl-4-carboxylate (5u).**

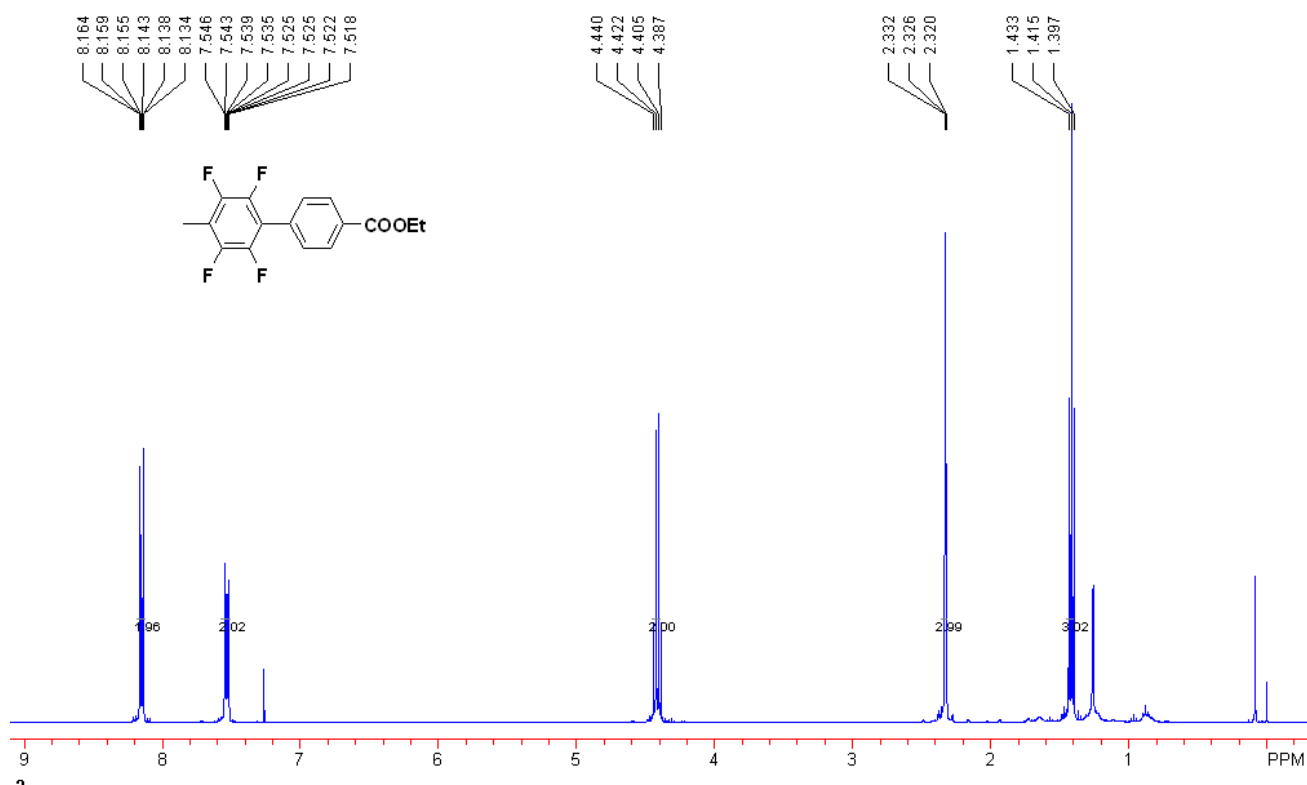

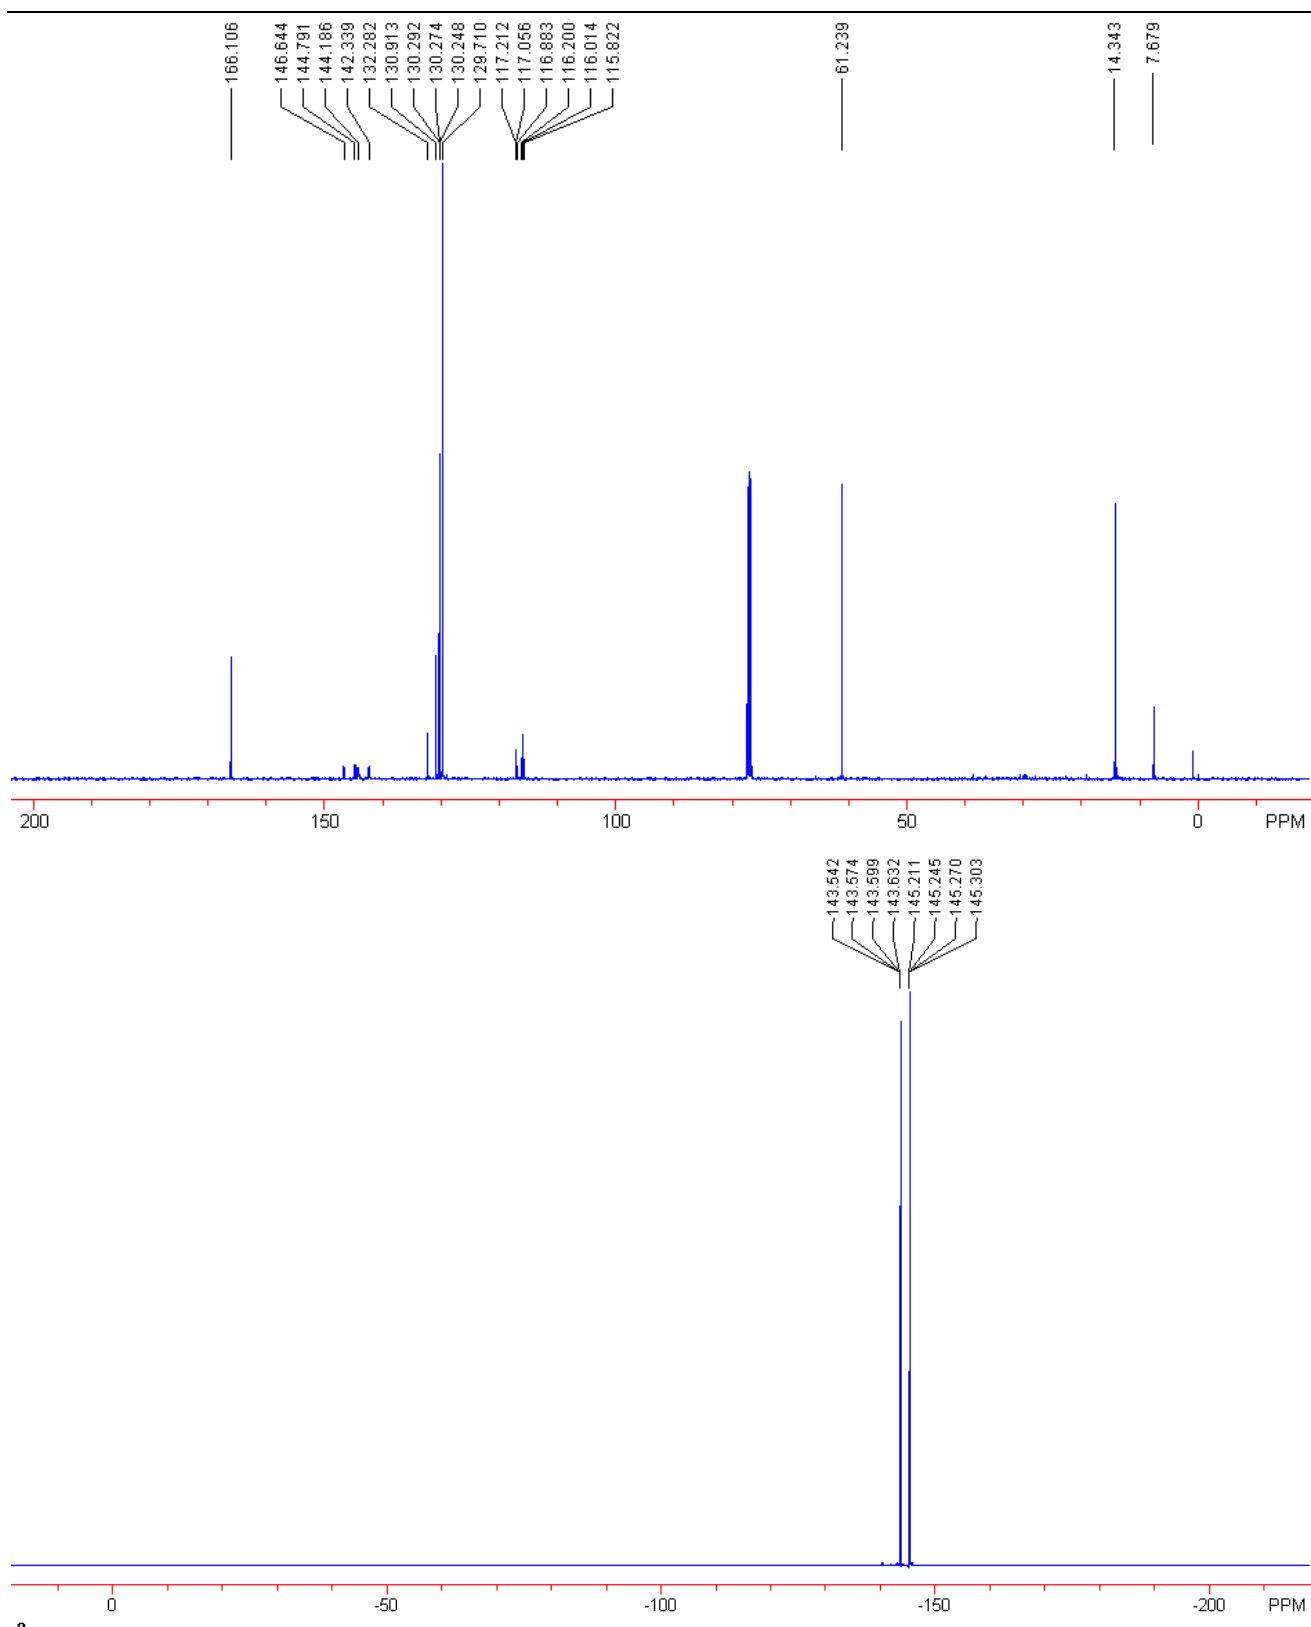

**4-bromo-2,3,5,6-tetrafluoro-4'-methoxybiphenyl (5v).**

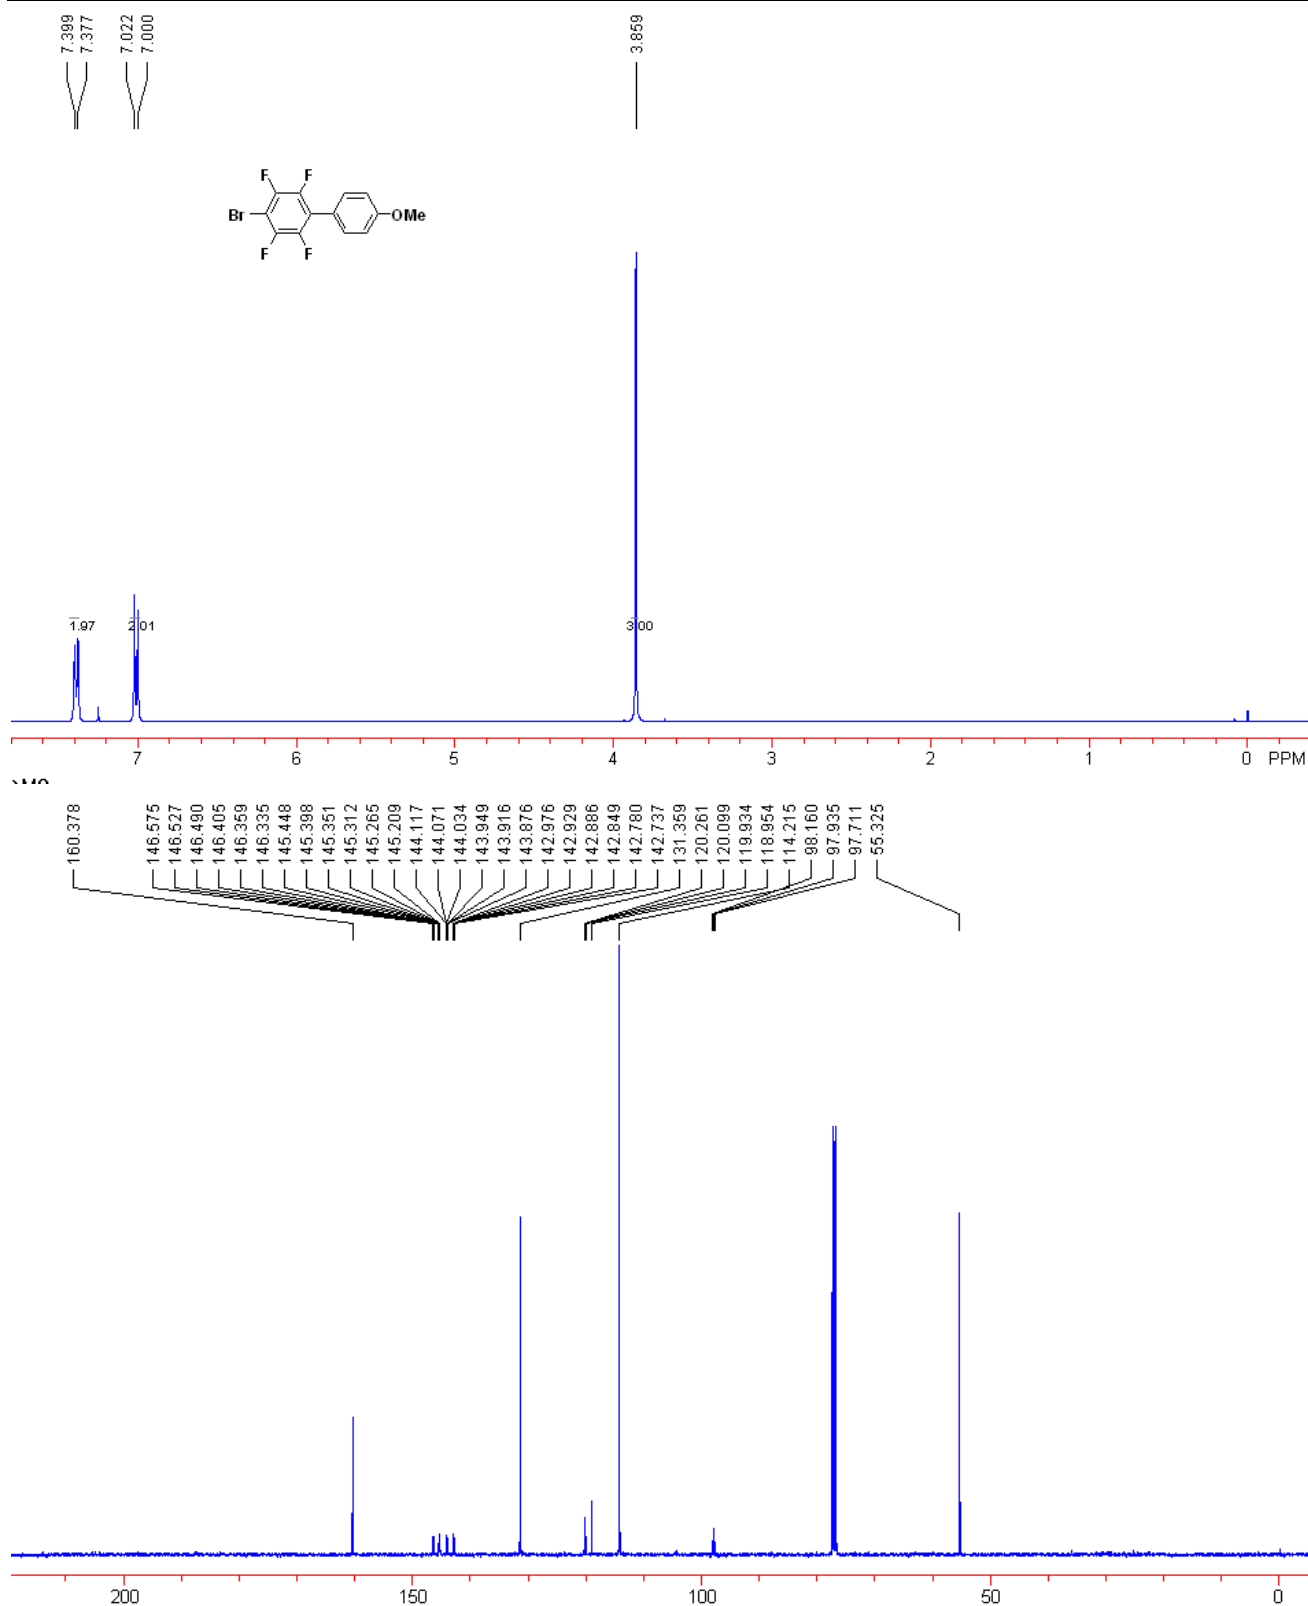

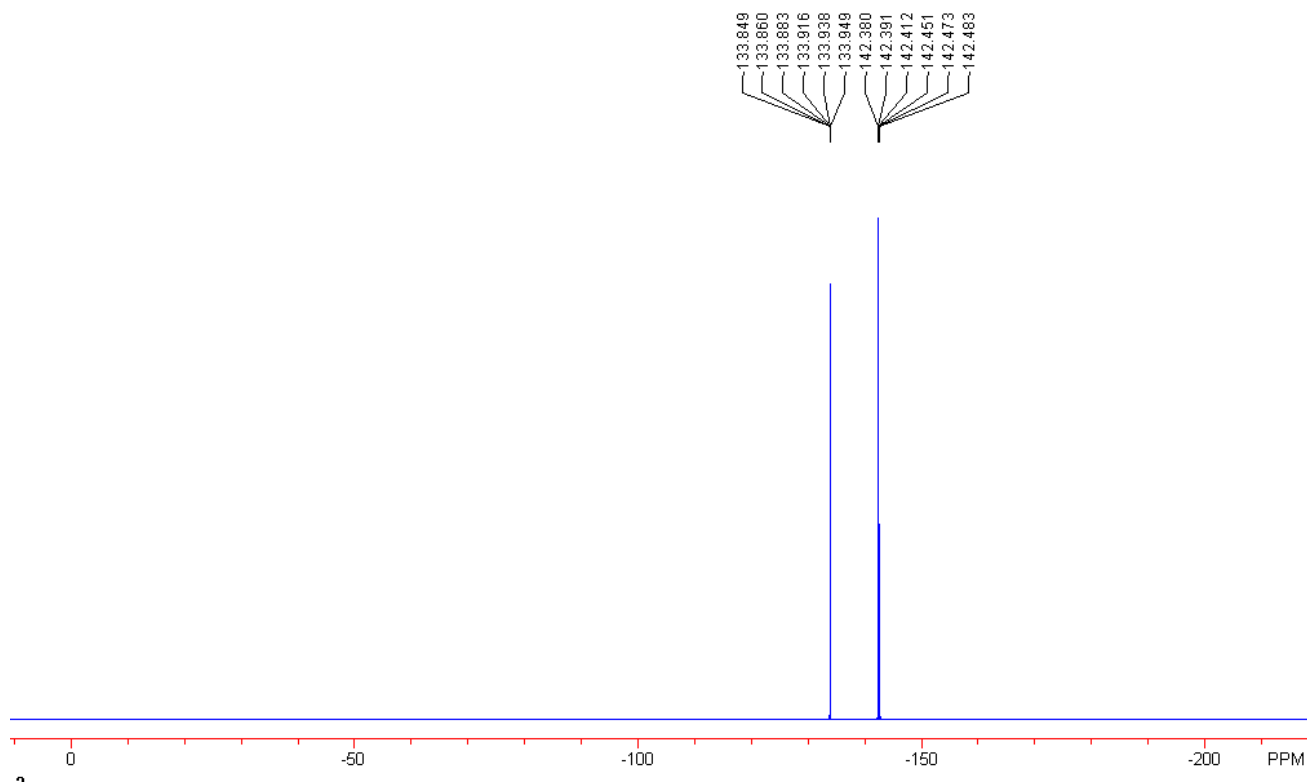

2,3,5,6-tetrafluoro-4'-methoxybiphenyl (5w).

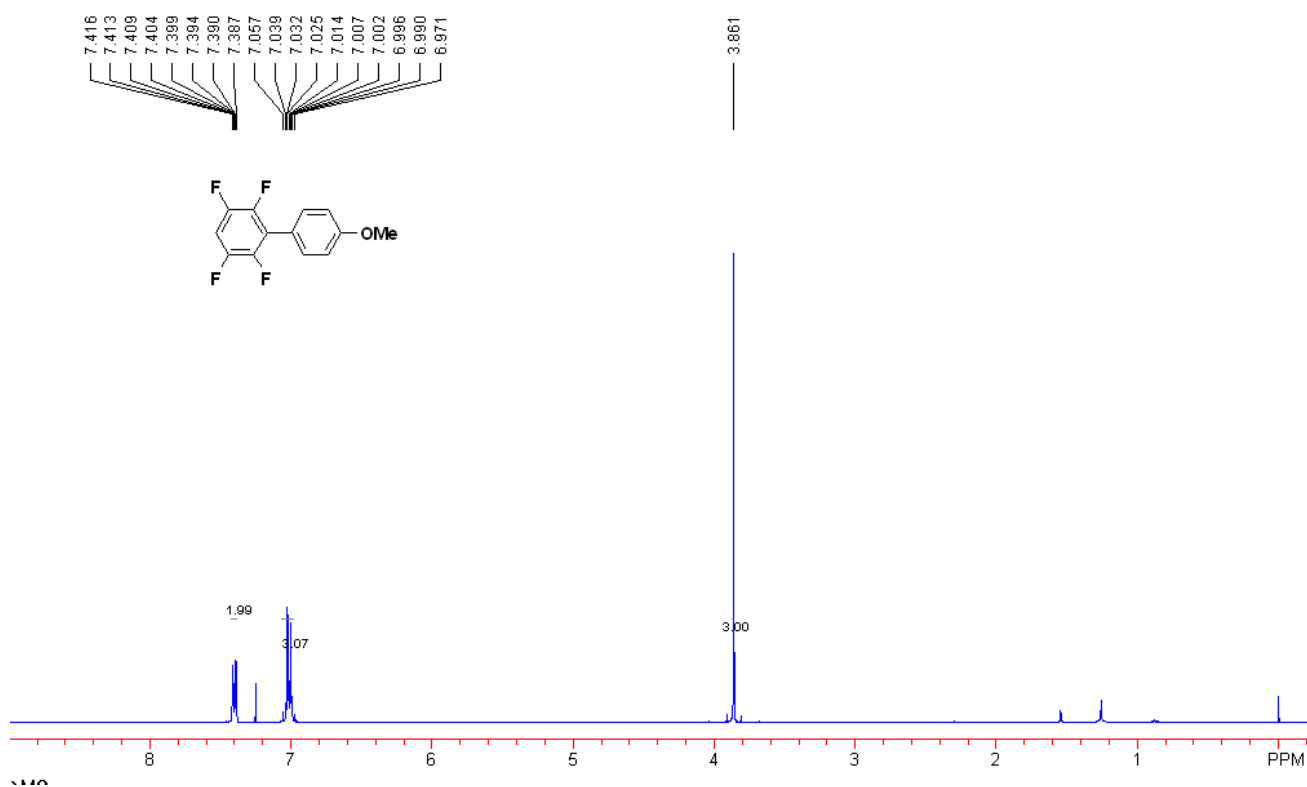

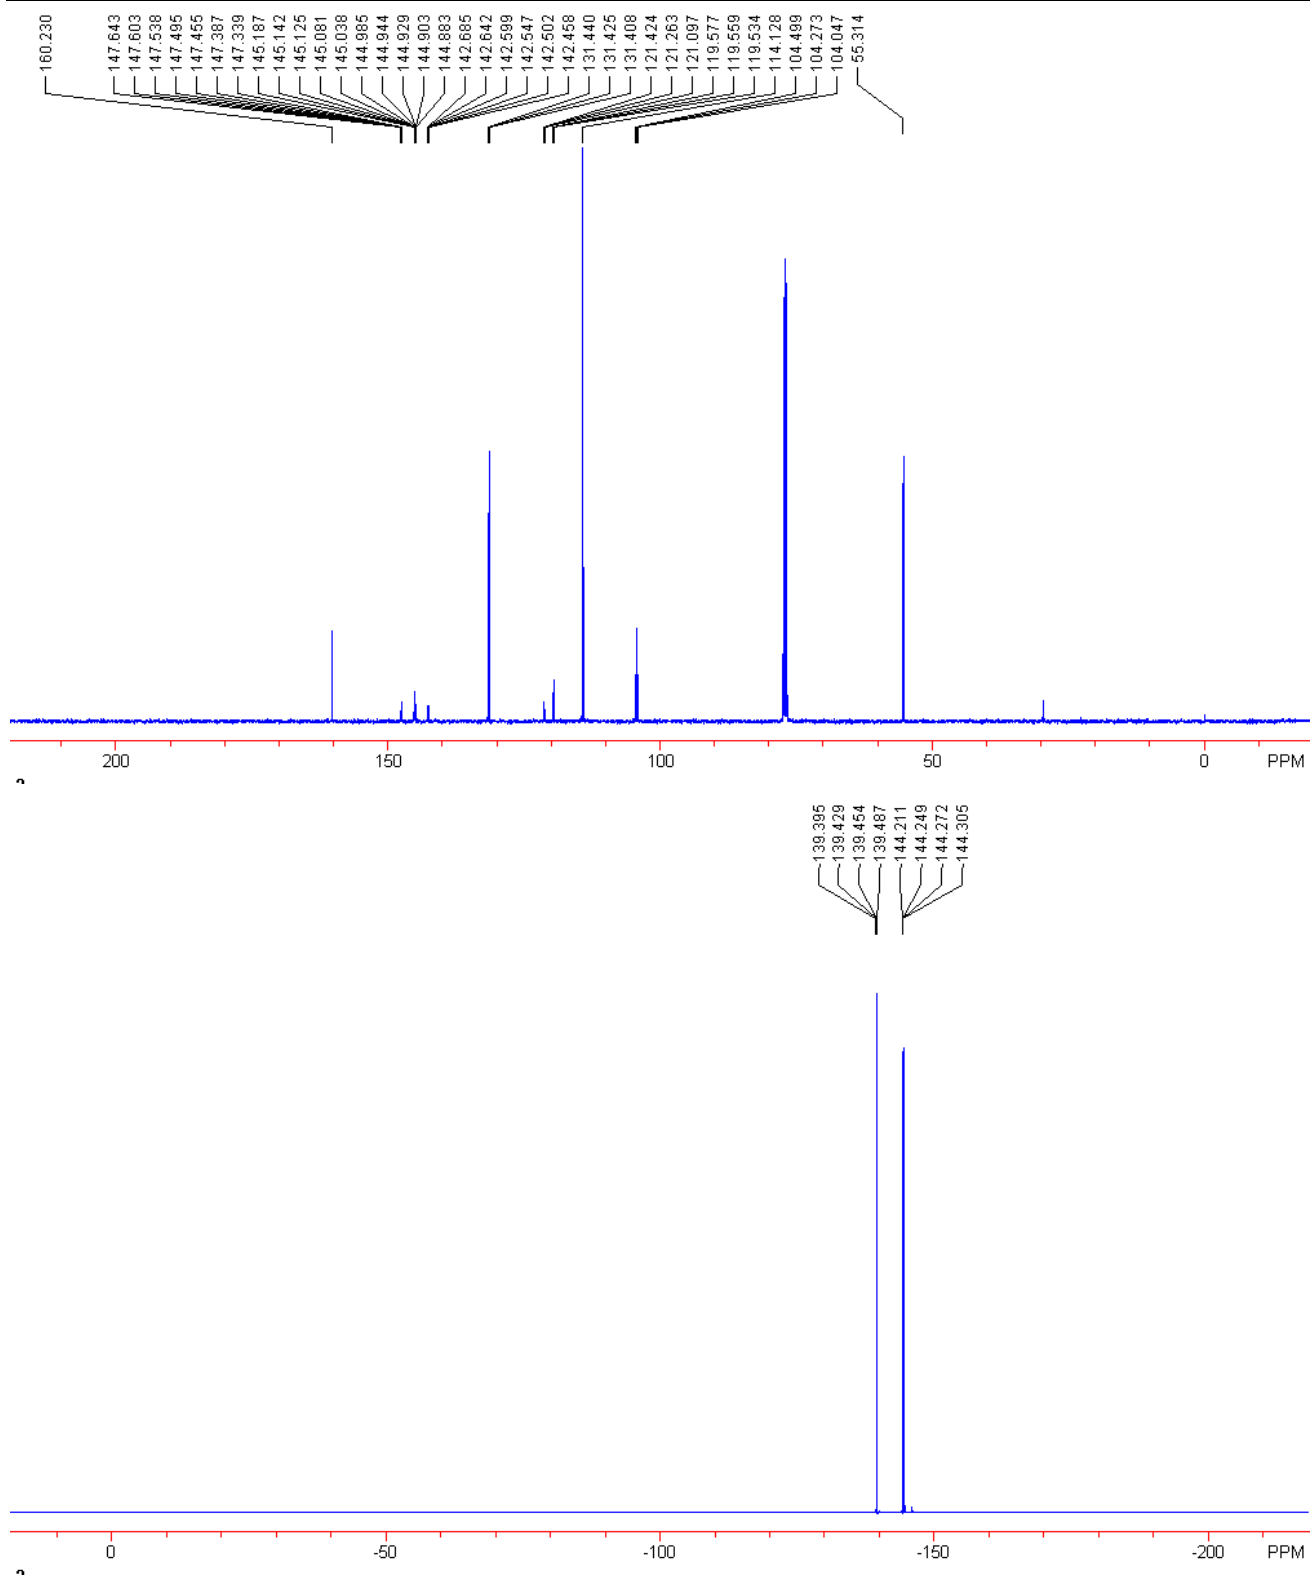

**phenyl 2,4,6-trimethoxybenzoate (6a).**

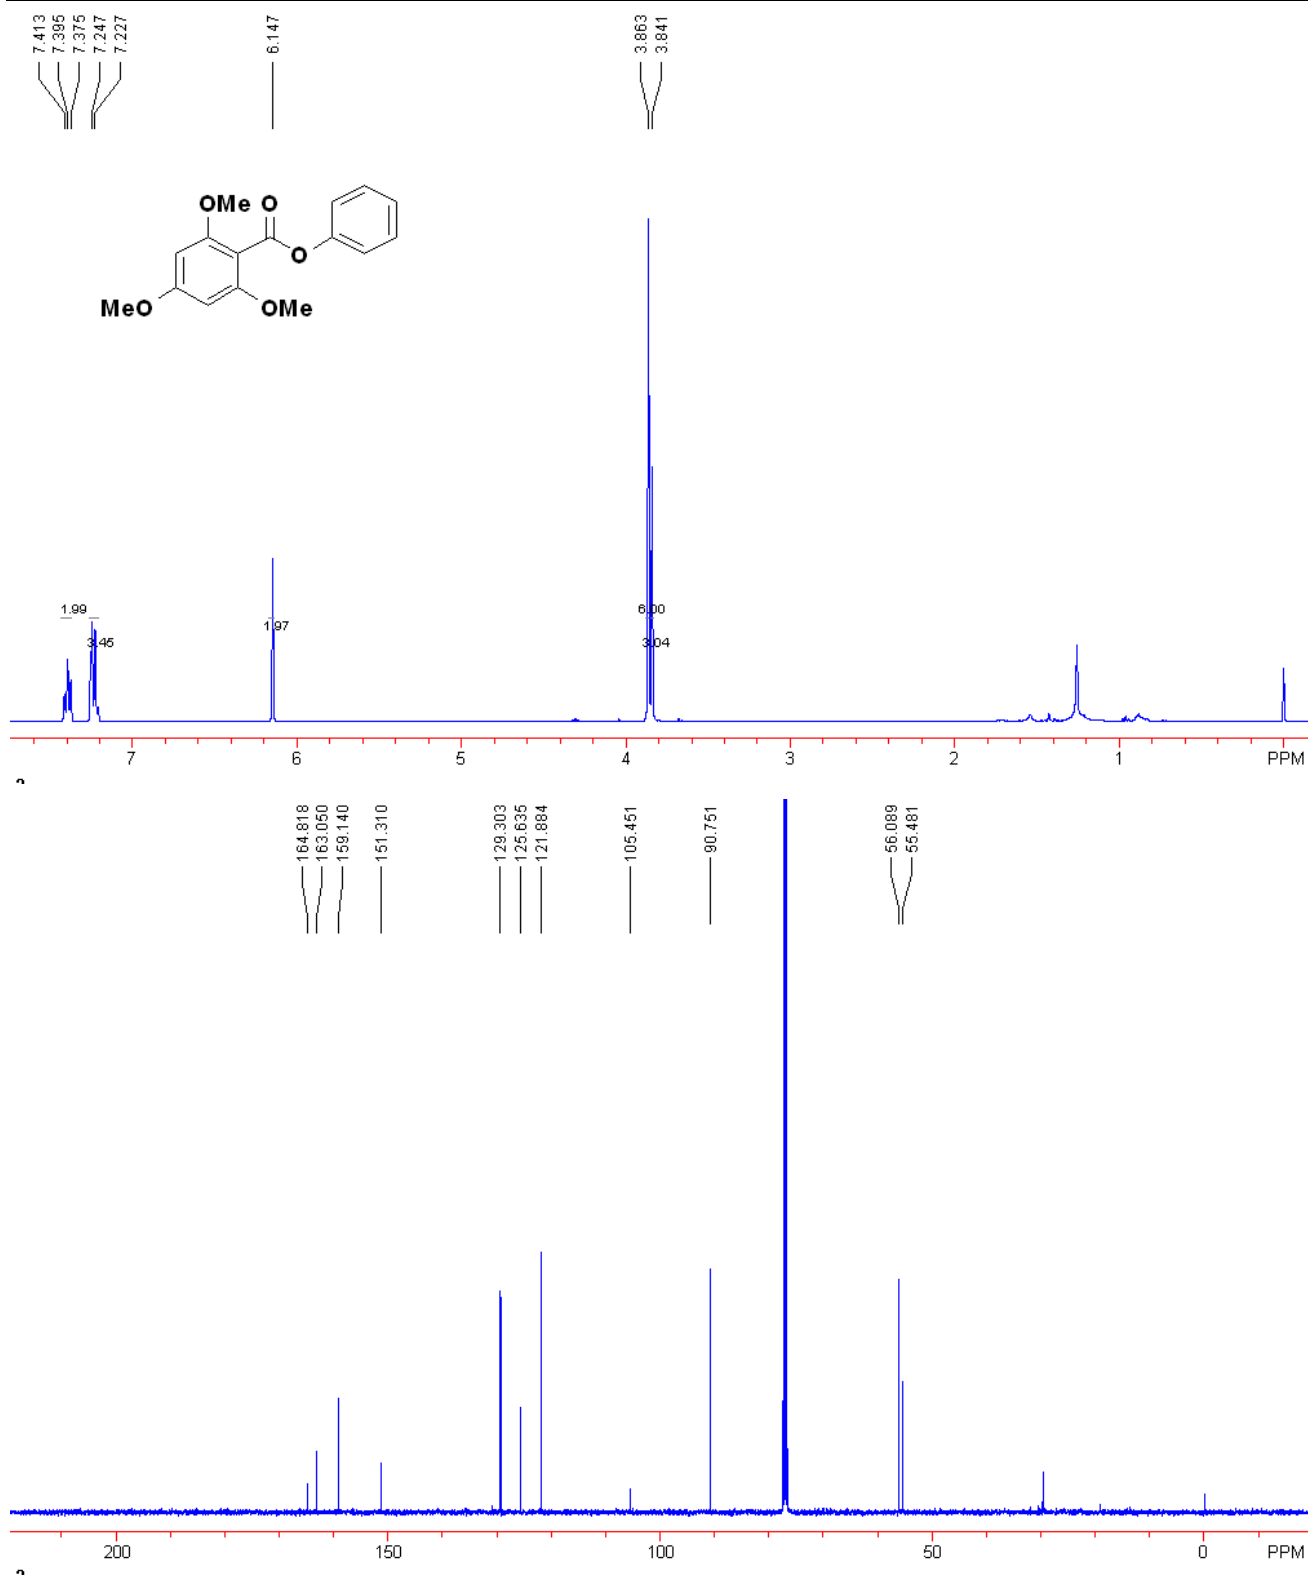

**phenyl 2,6-dimethoxybenzoate (6b).**

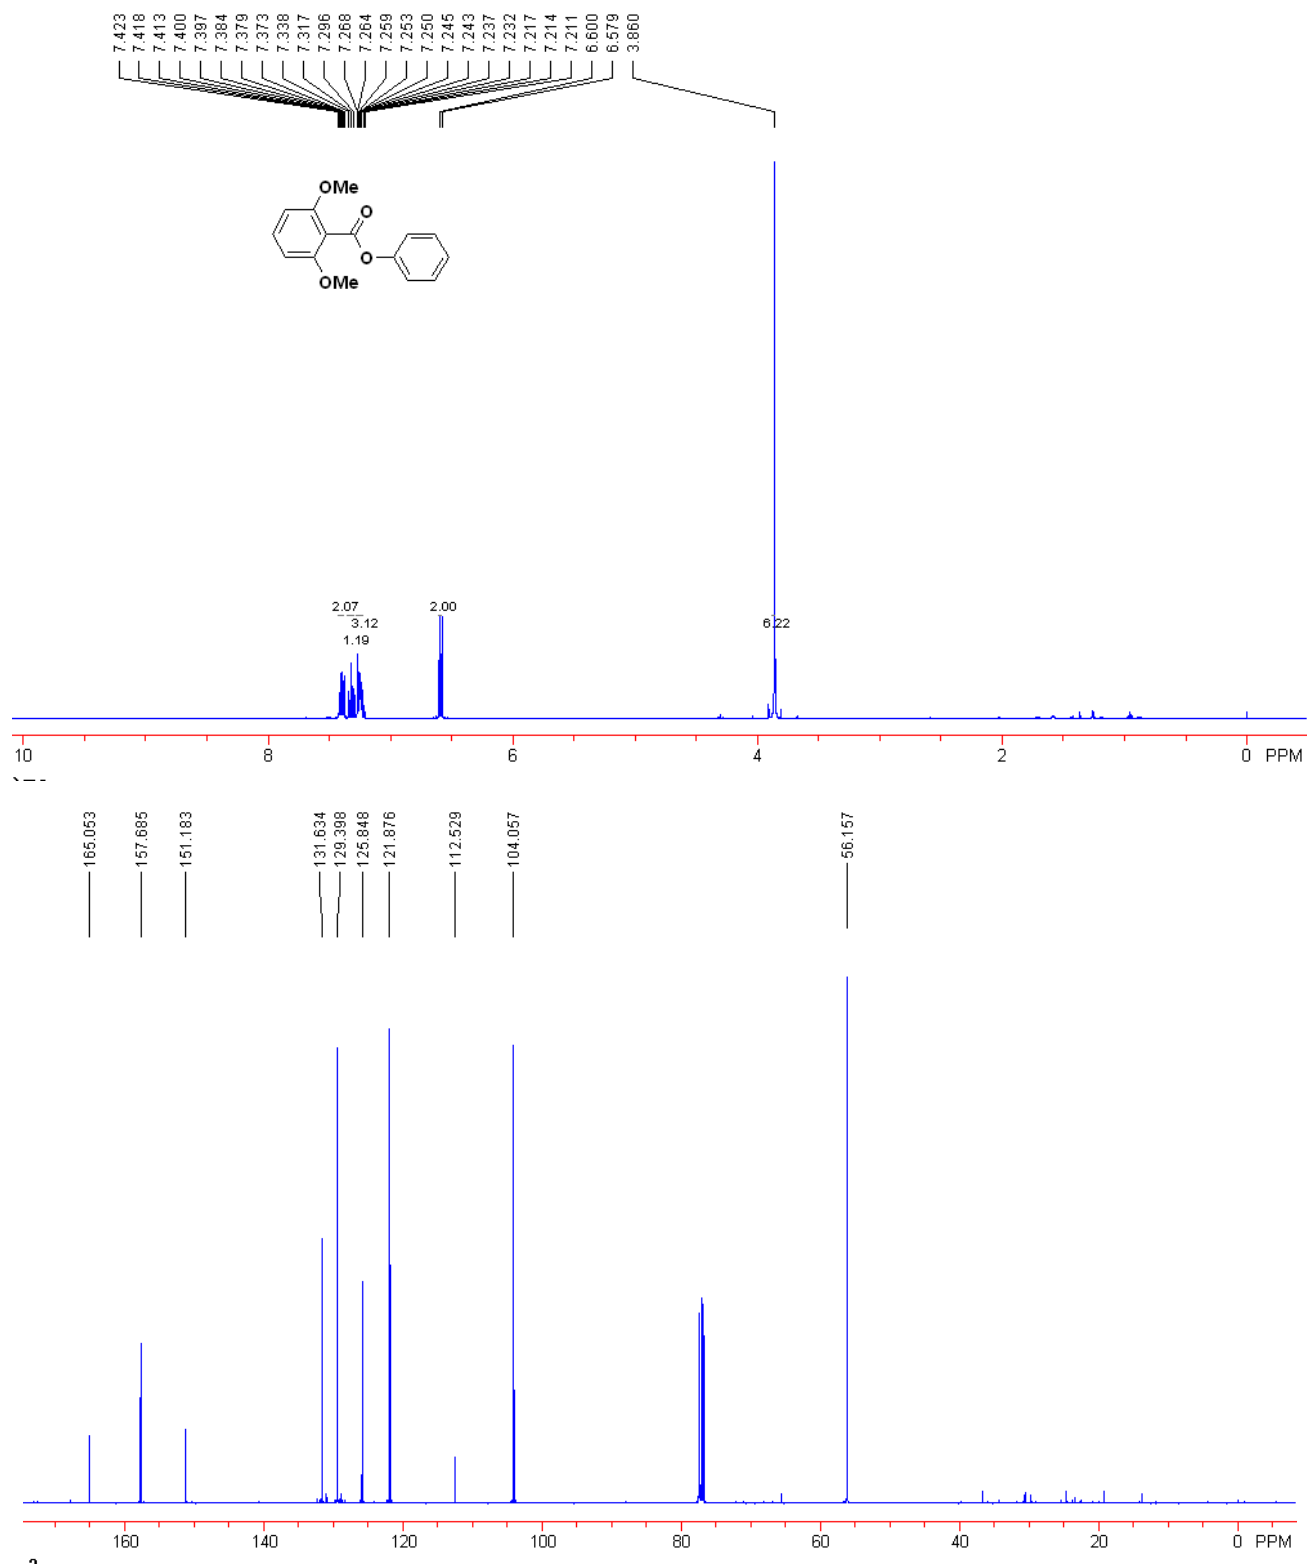

**4-bromophenyl 2,6-dimethoxybenzoate (6c).**

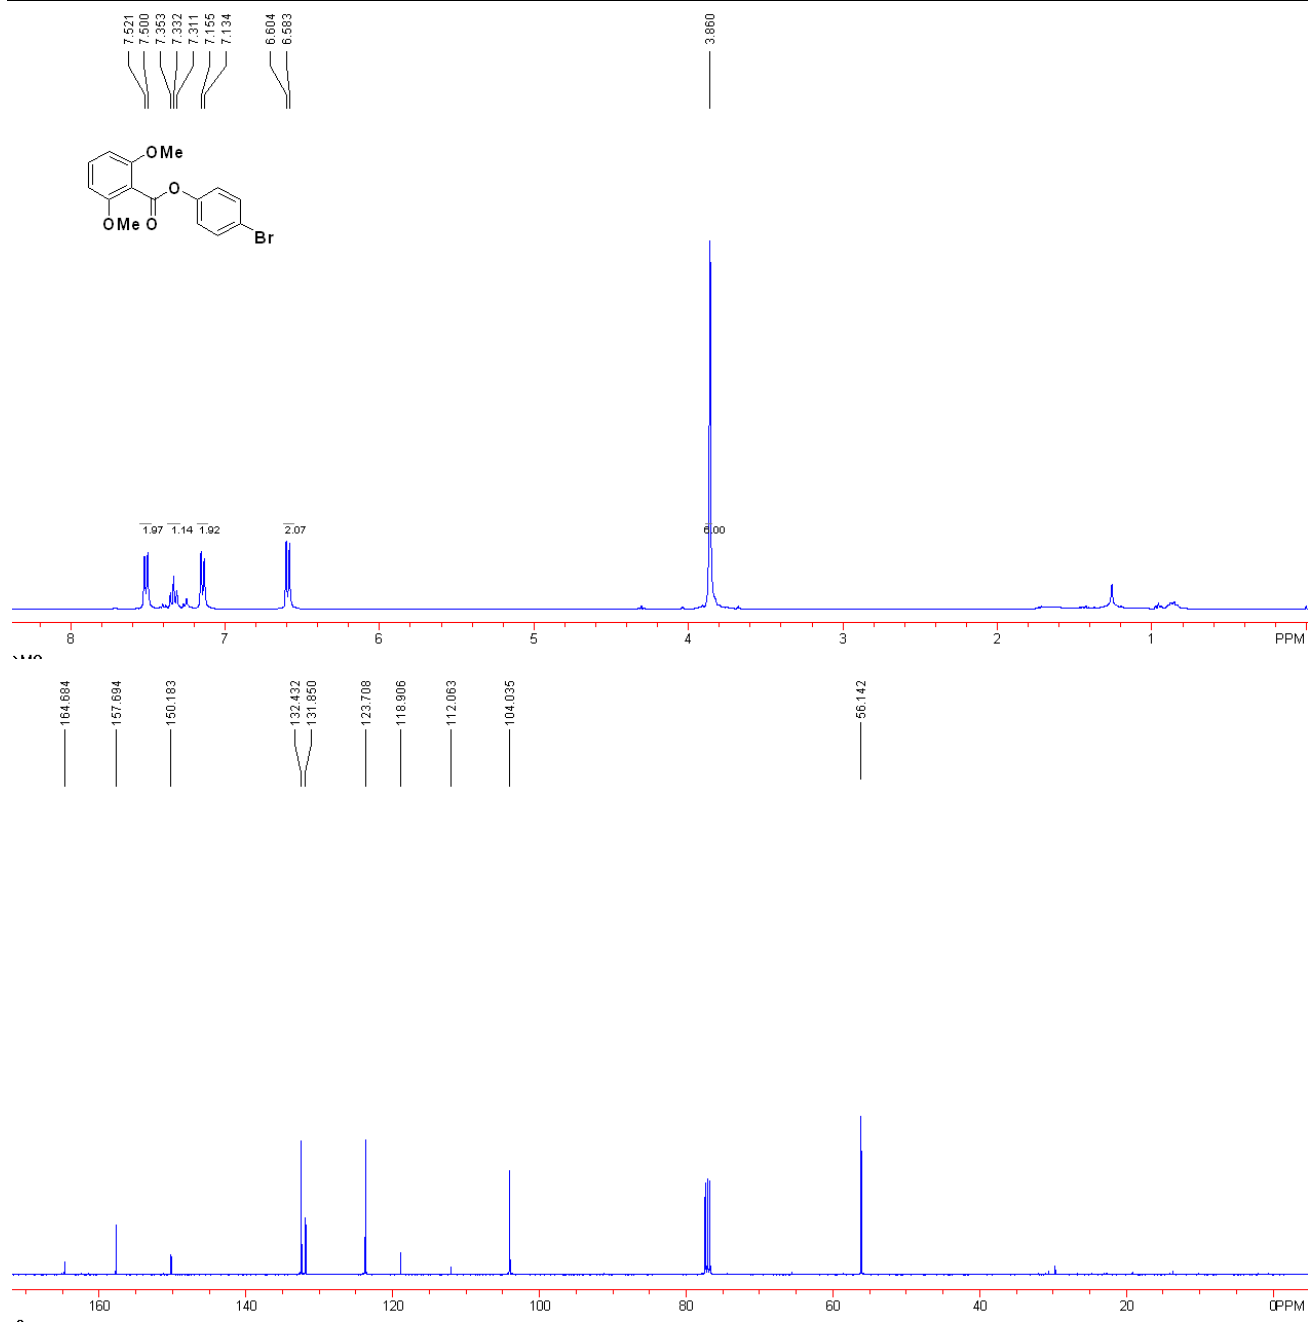

***p*-tolyl 2,6-dimethoxybenzoate (6d).**



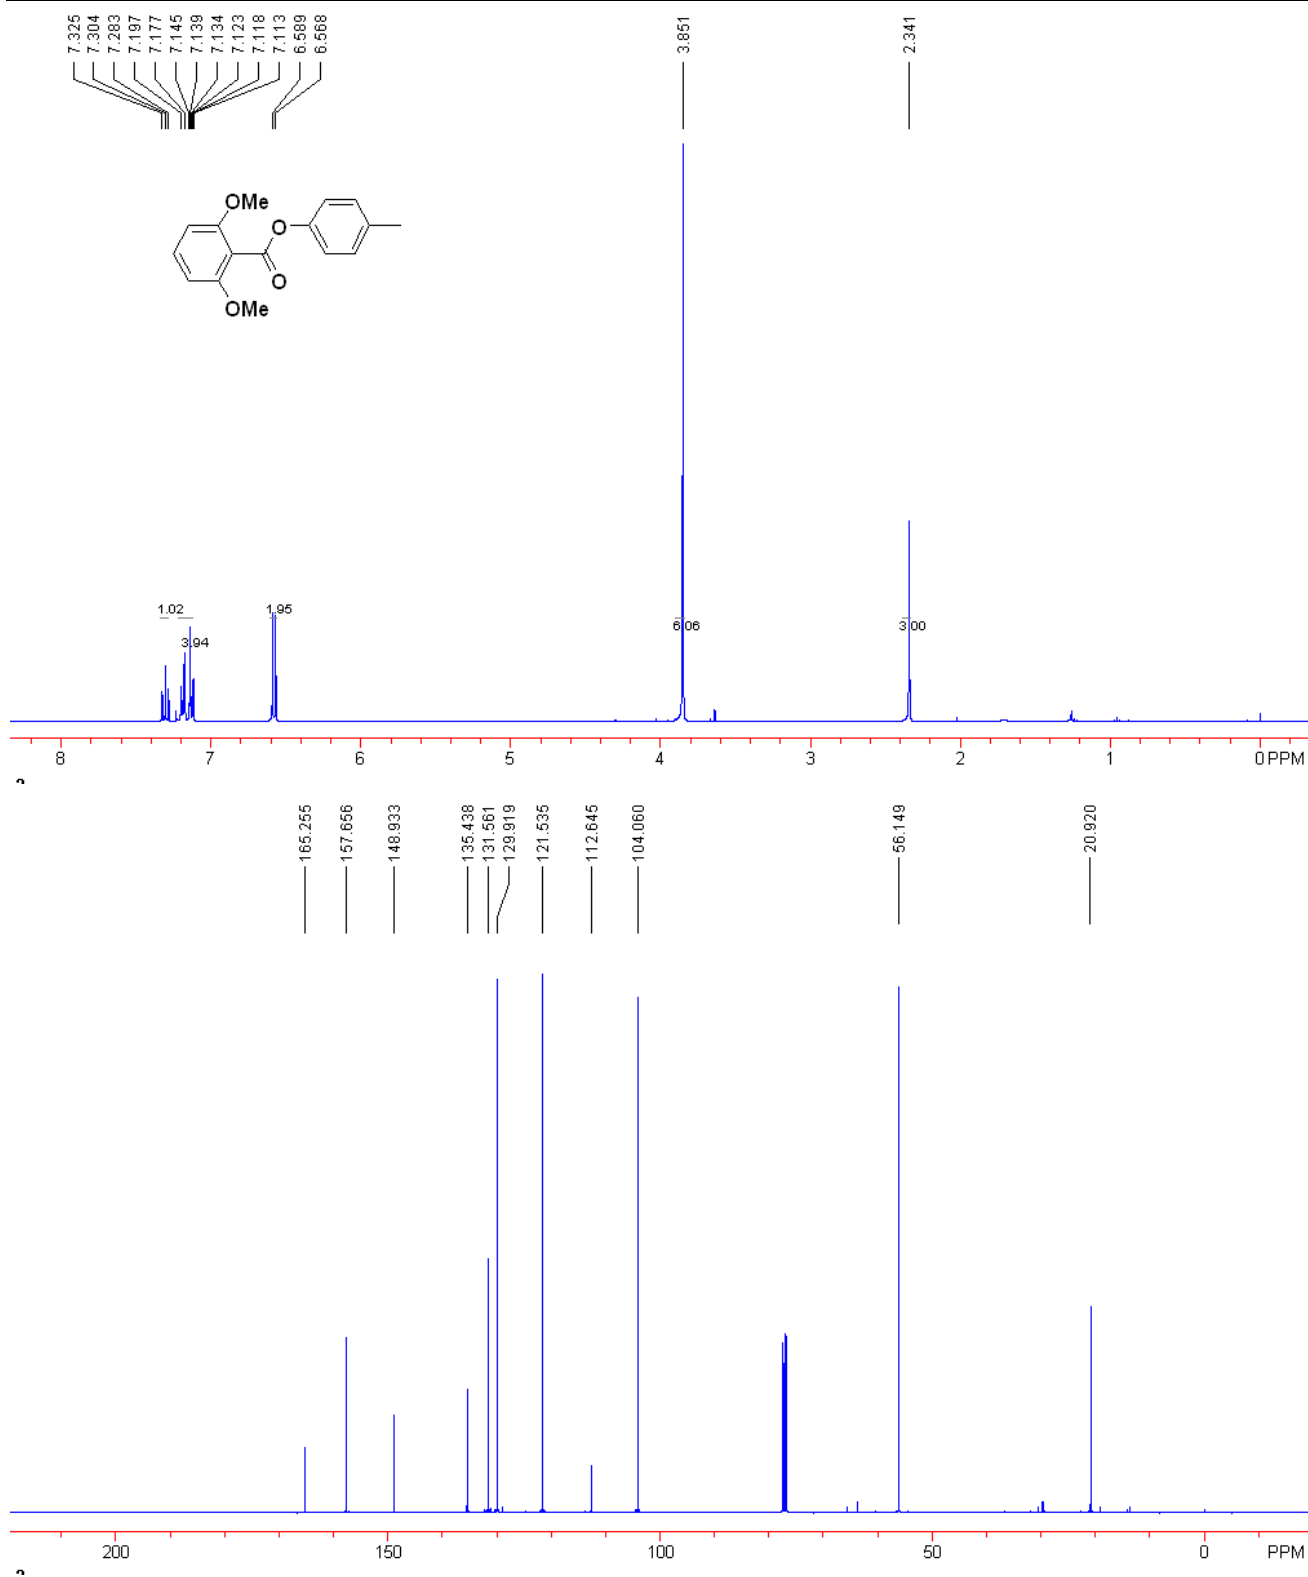

**4-methoxyphenyl 2,6-dimethoxybenzoate (6e).**

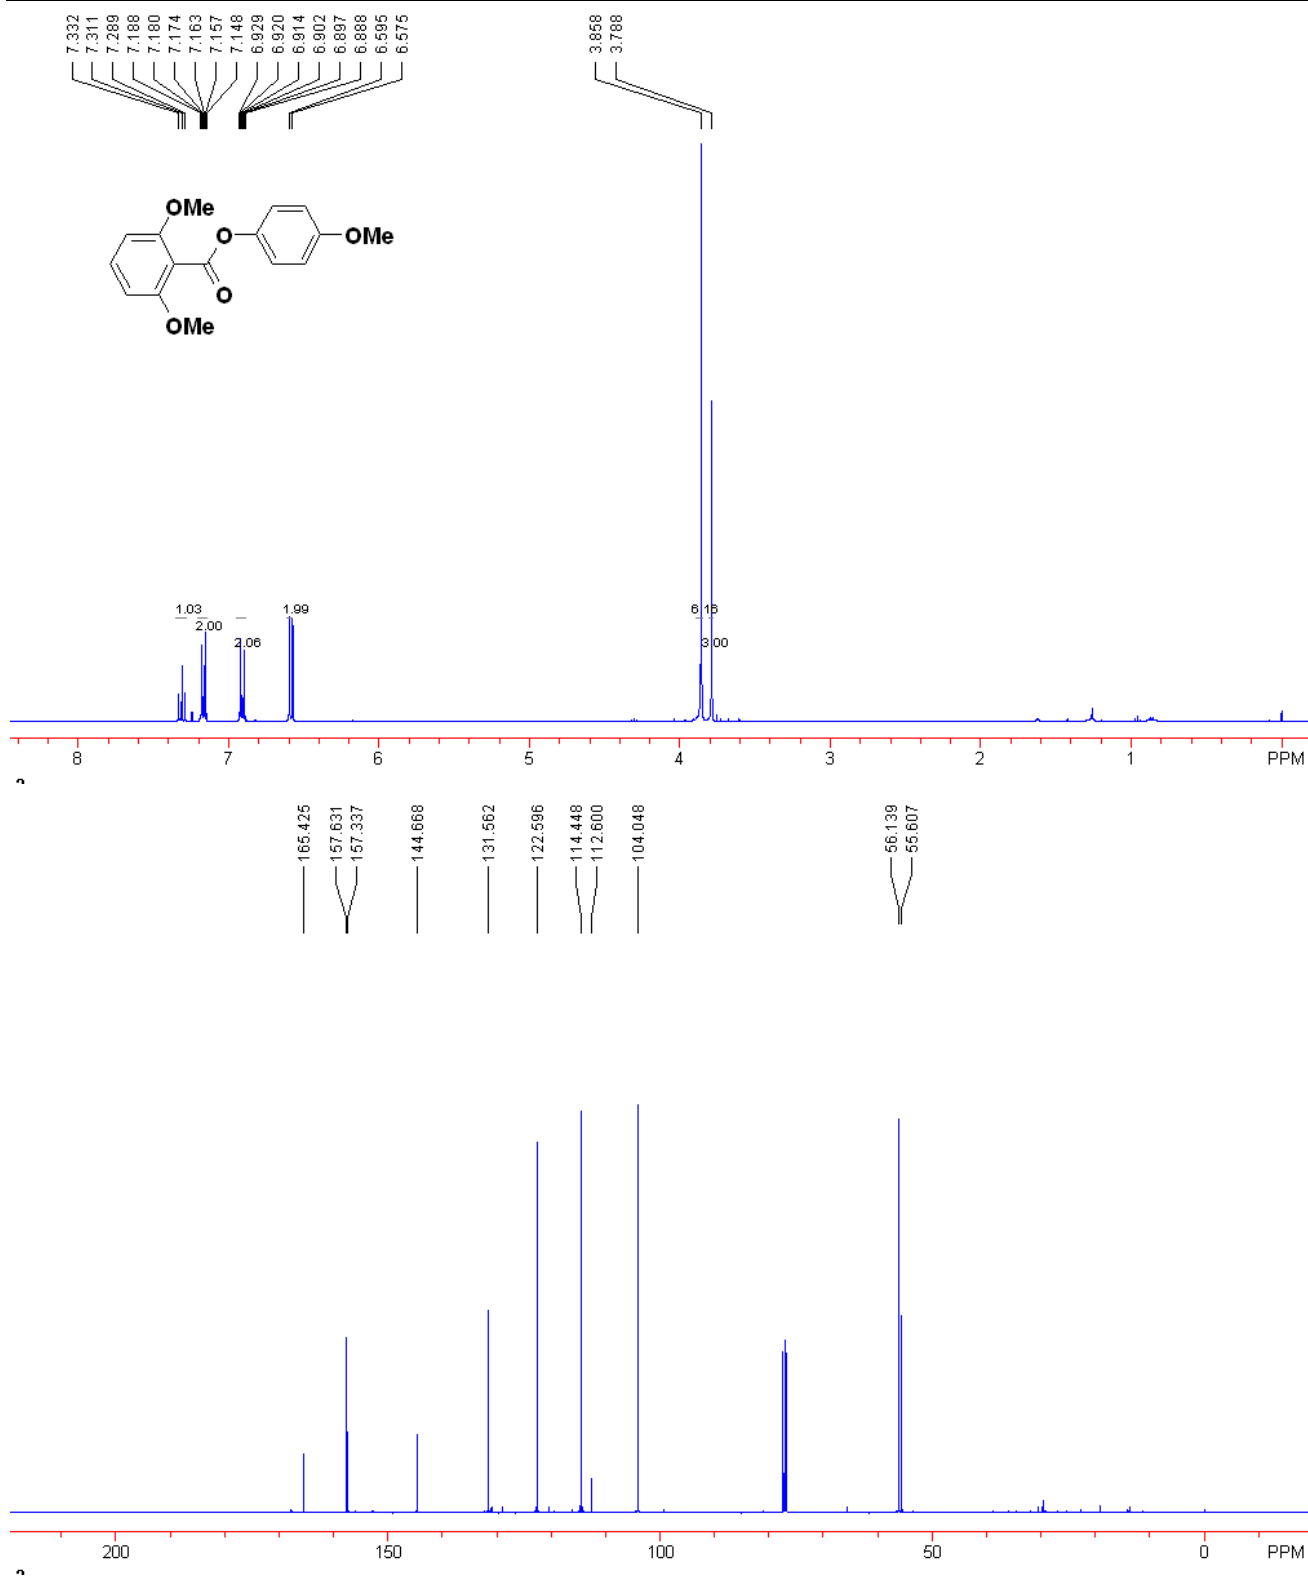

**4-acetylphenyl 3-bromo-2,6-dimethoxybenzoate (6f).**

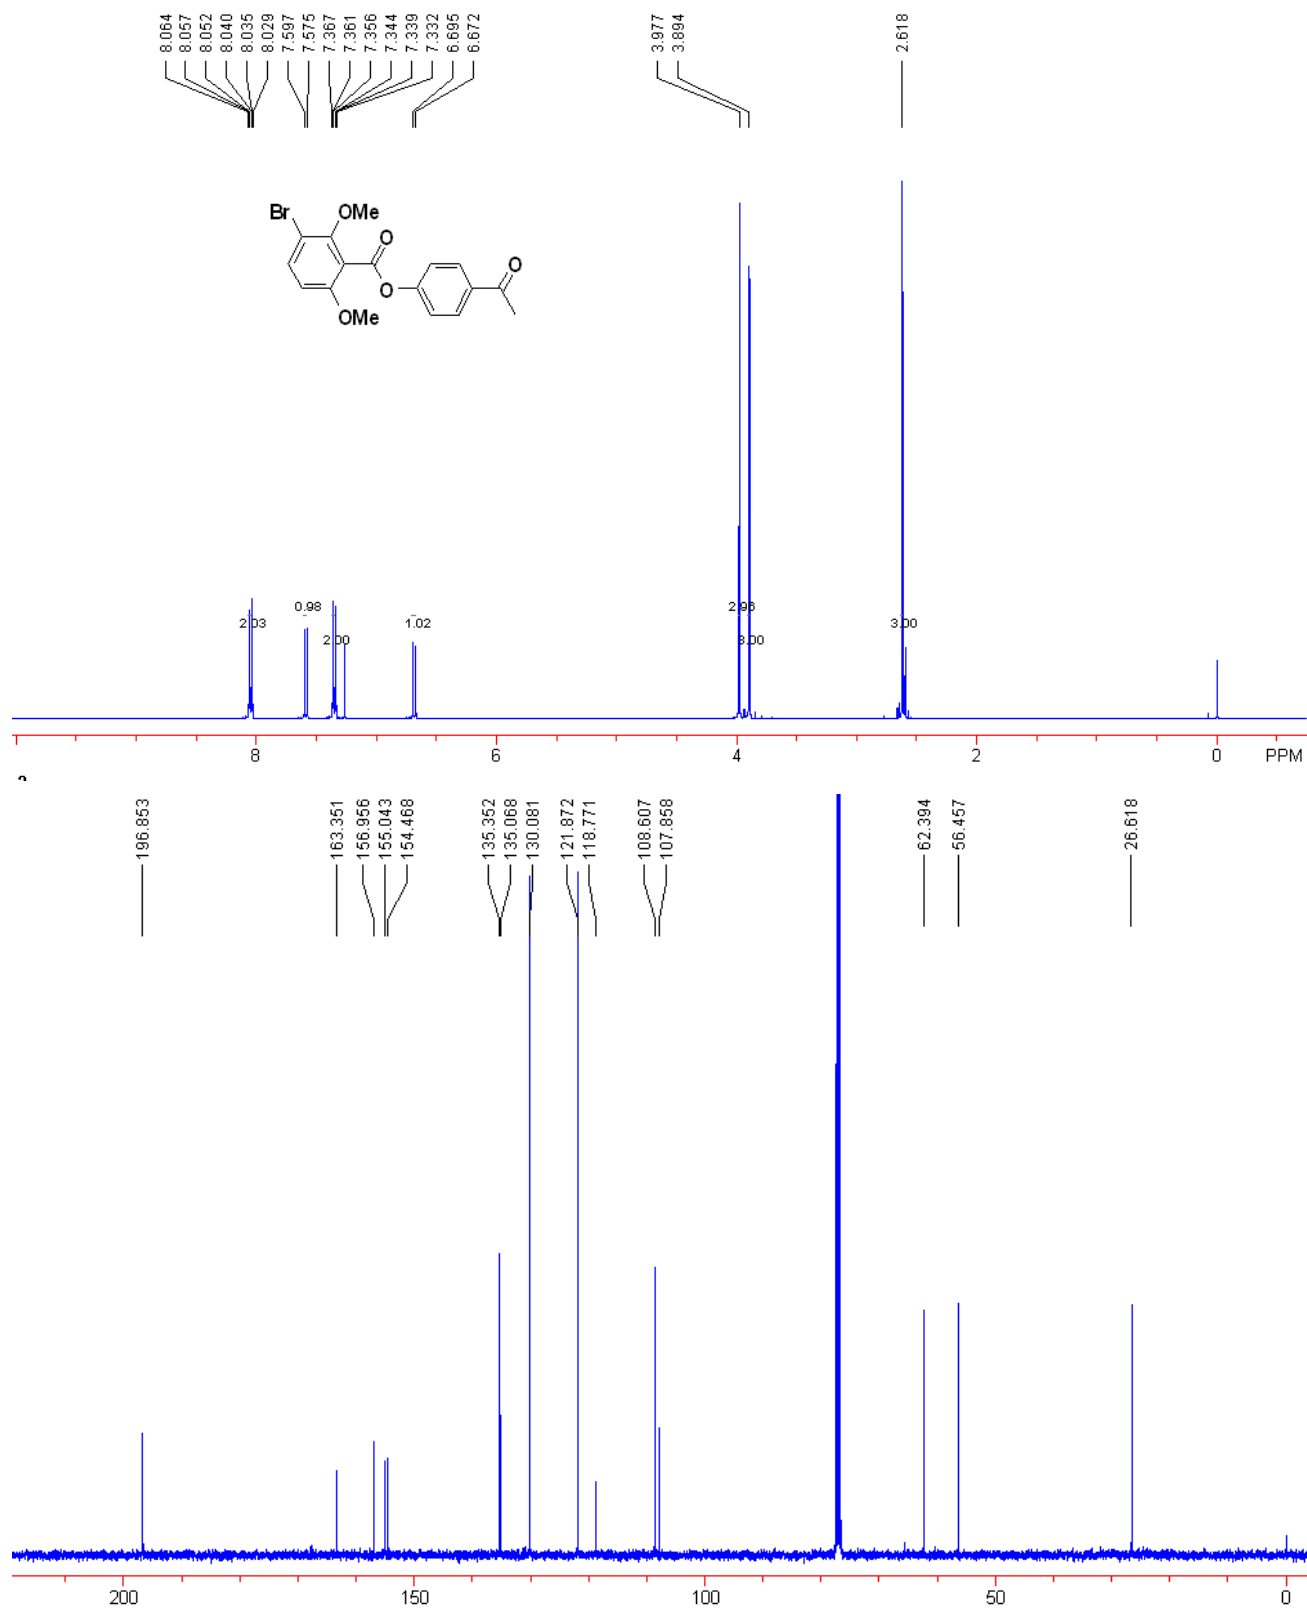

phenyl 2,6-difluoro-4-methoxybenzoate (6g).

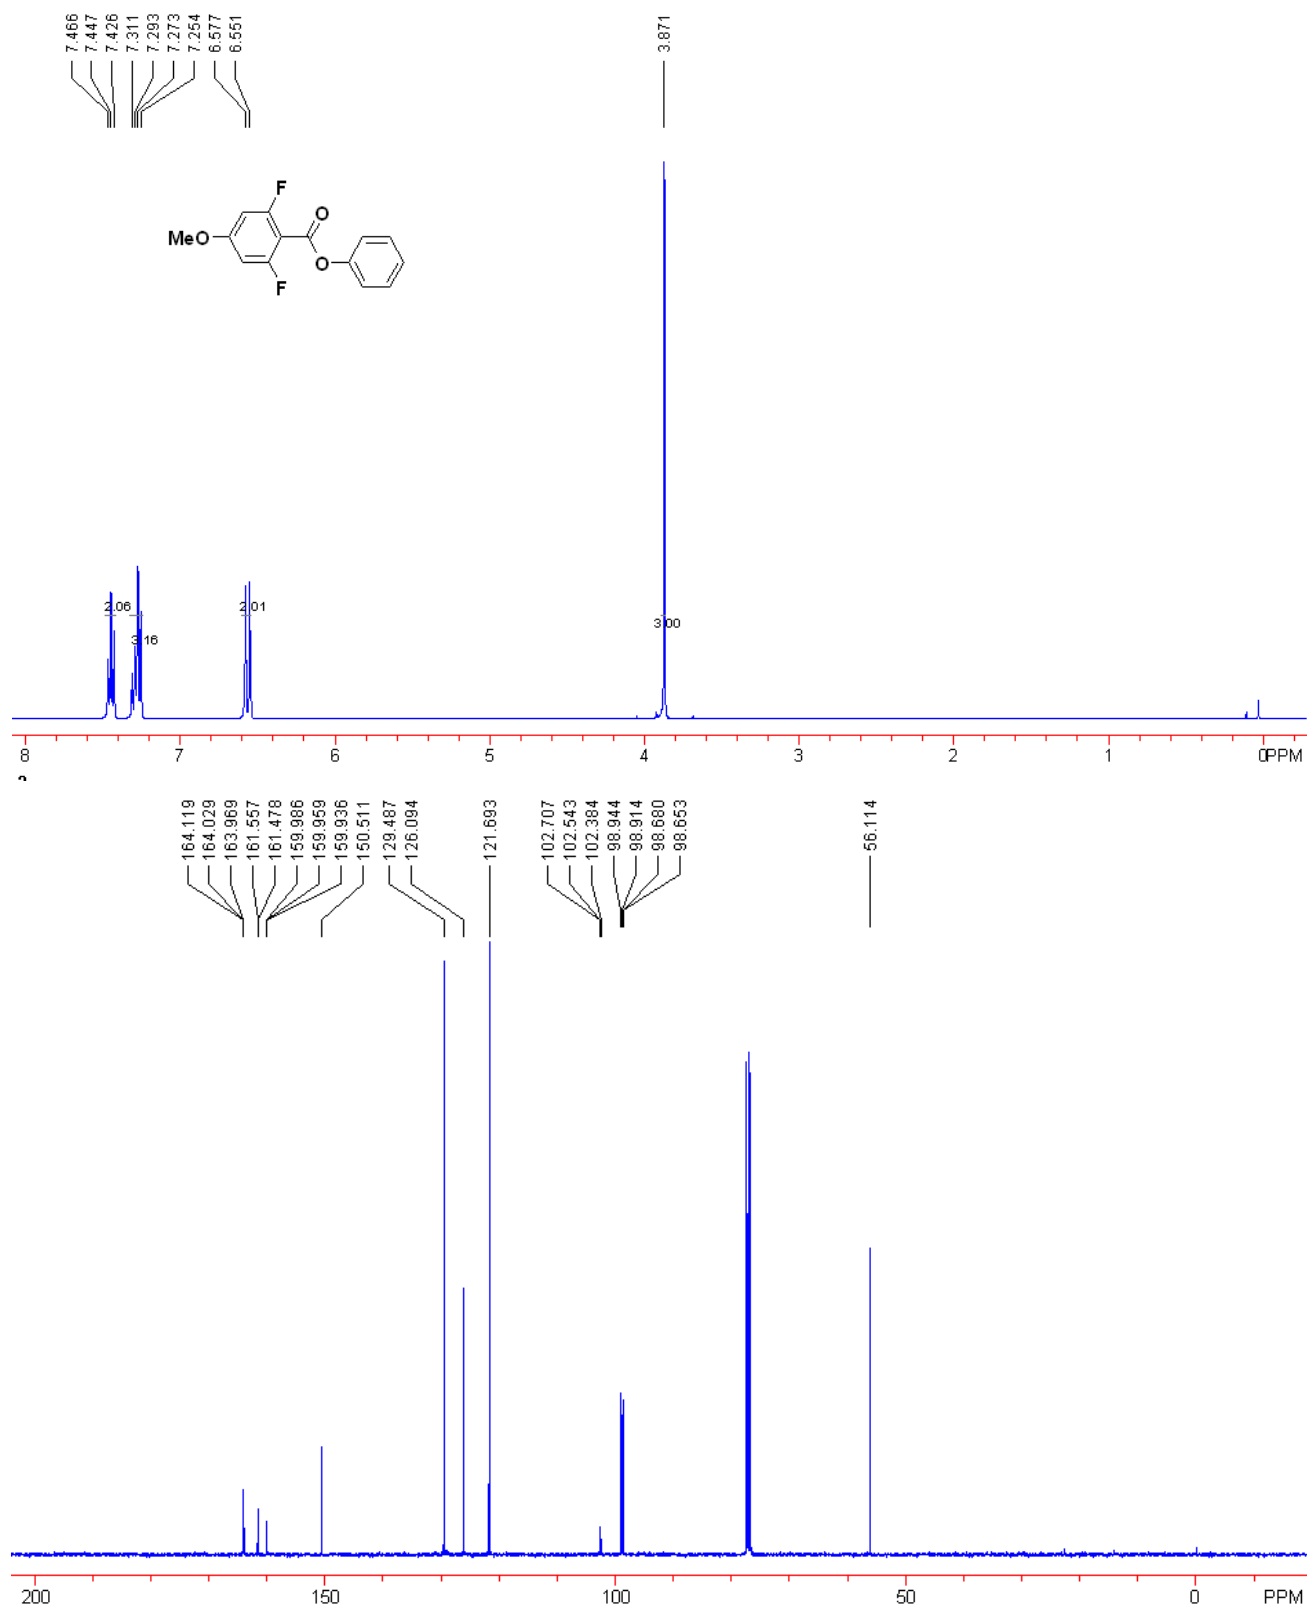

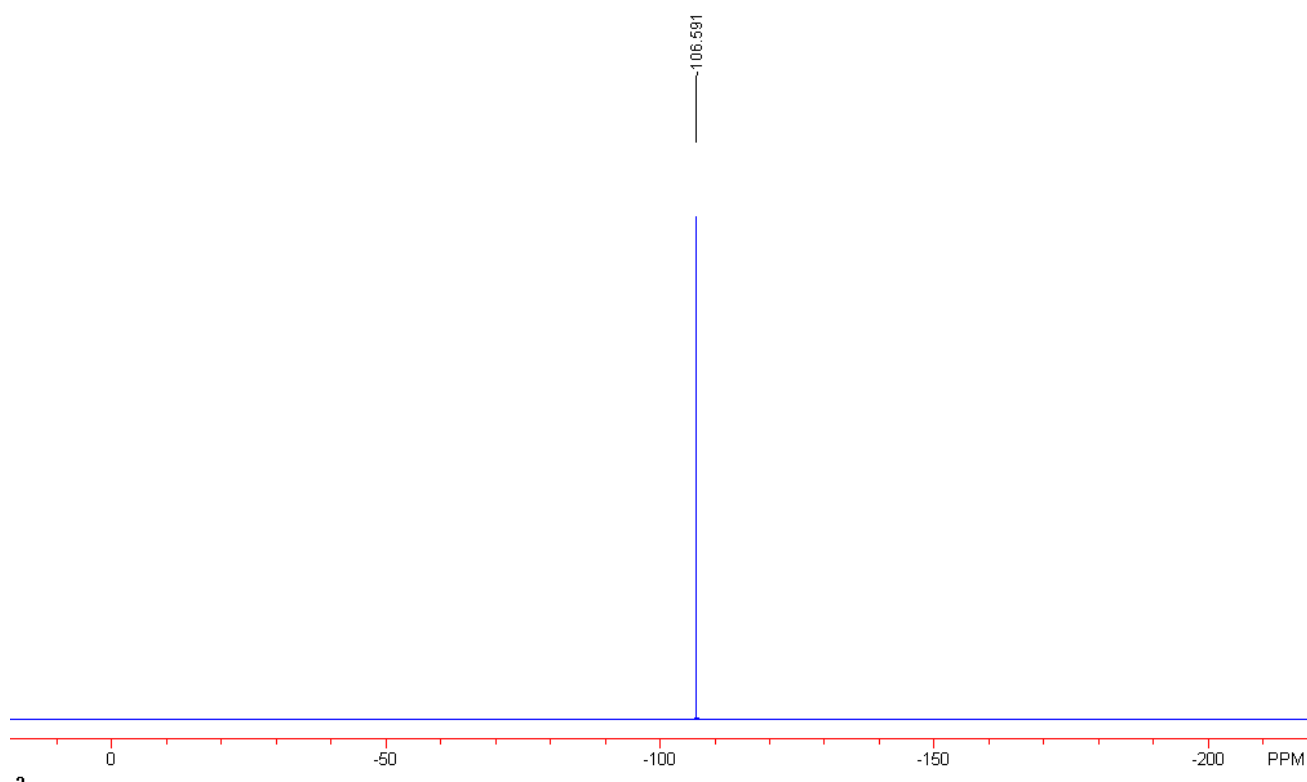

**phenyl benzoate (6h).**

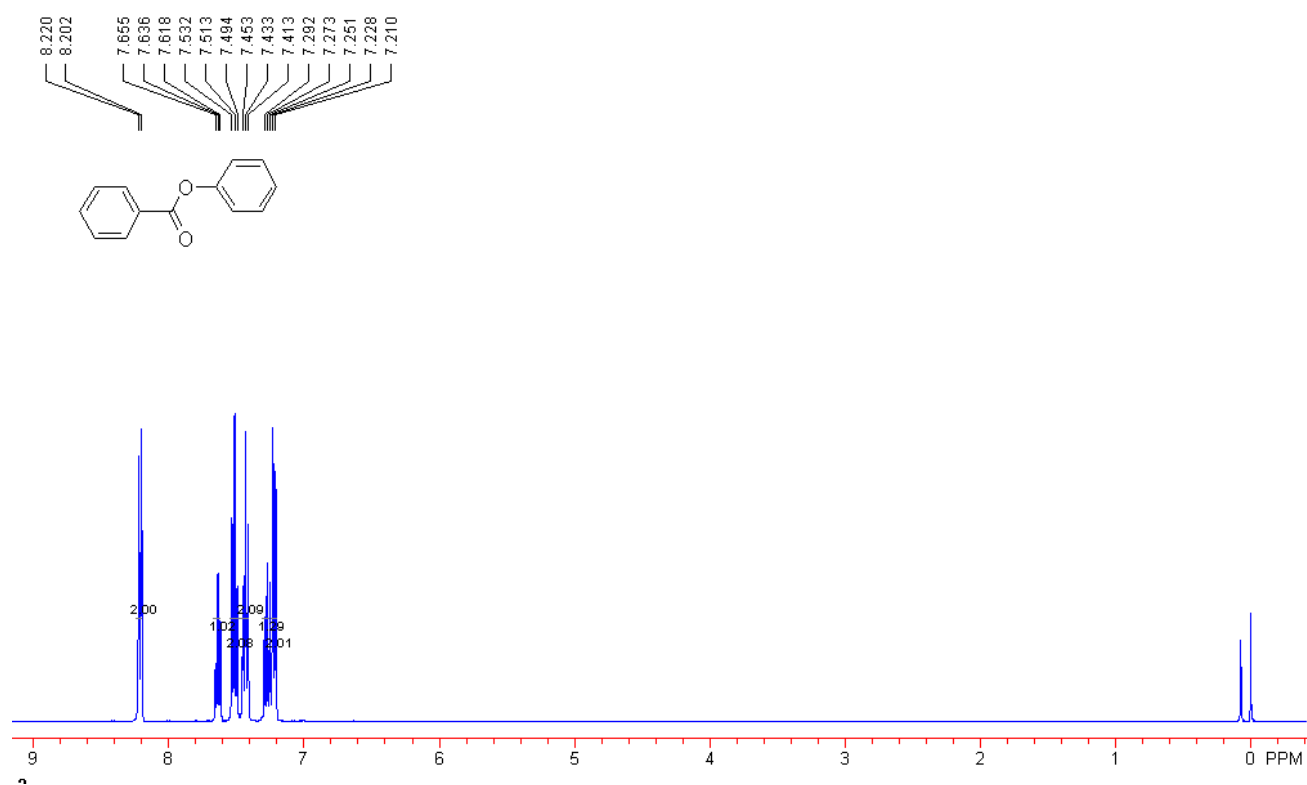

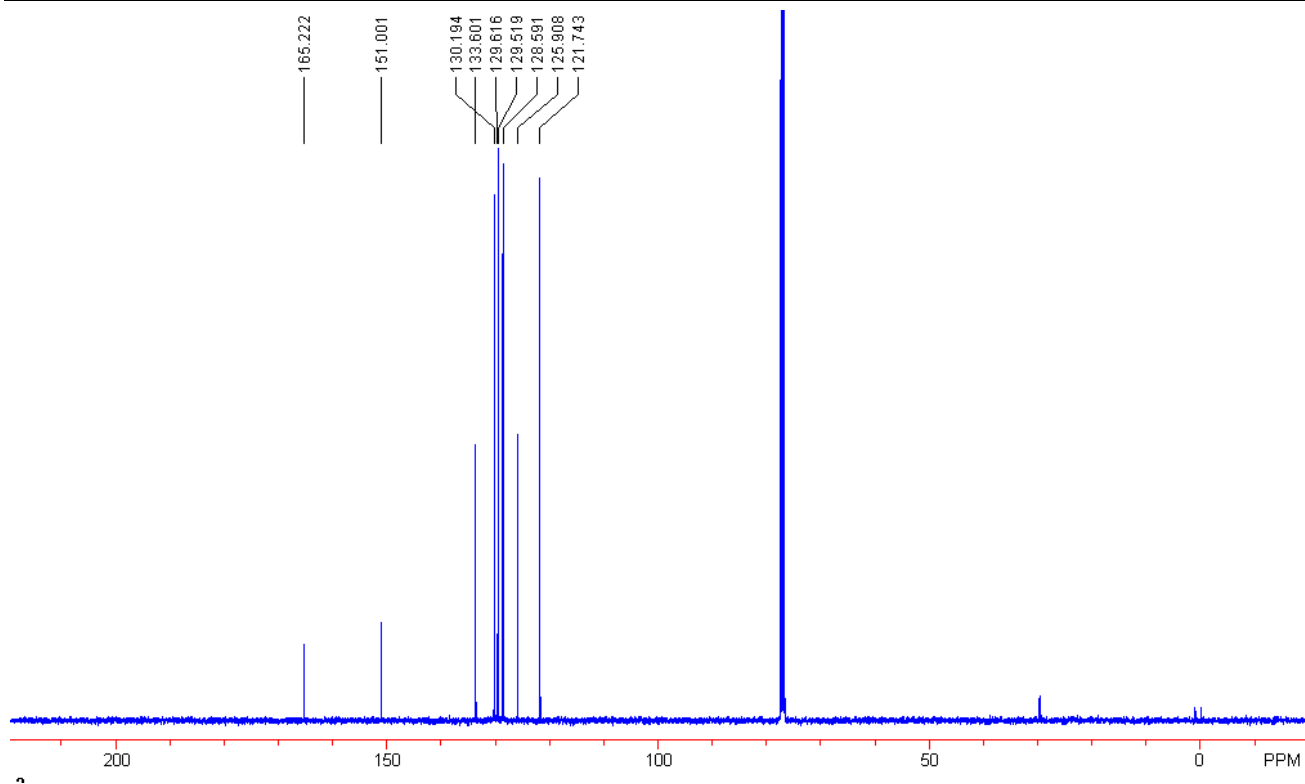

**phenyl 4-methoxybenzoate (6i).**

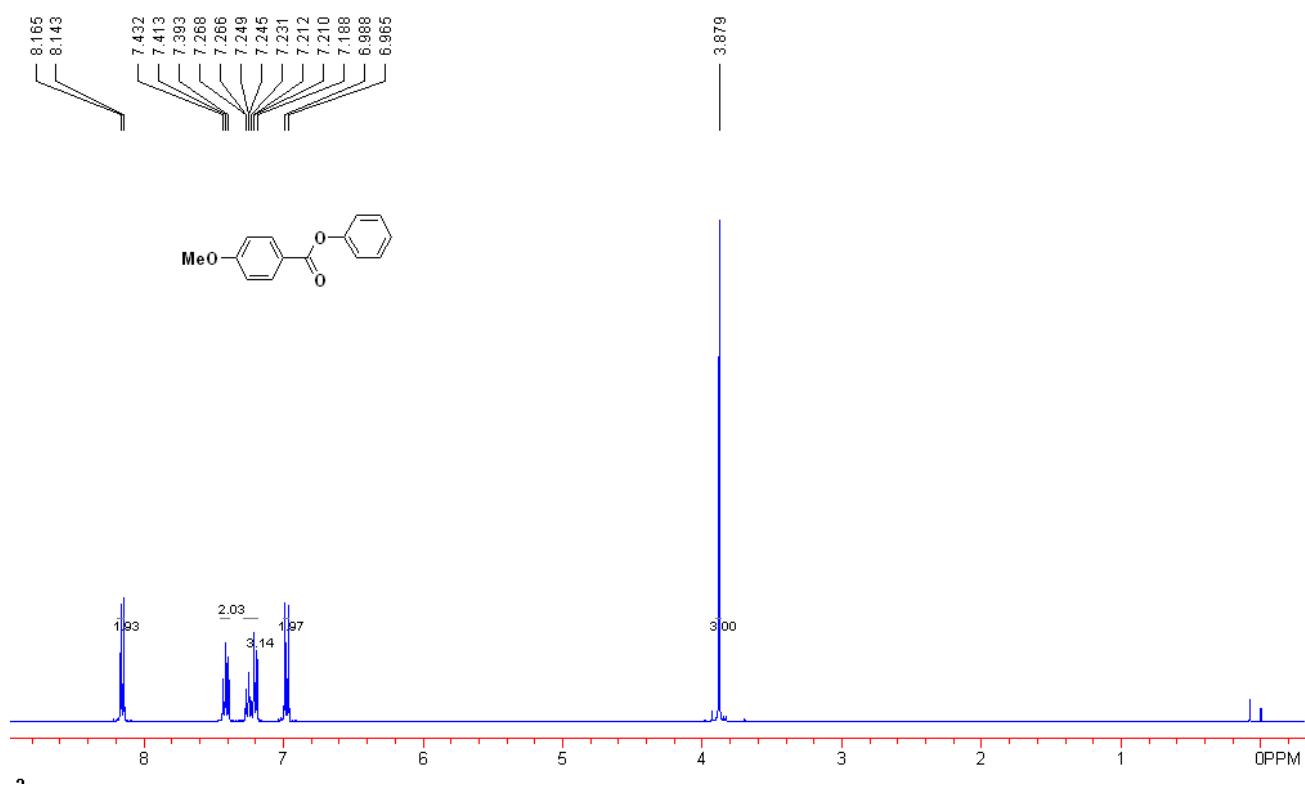

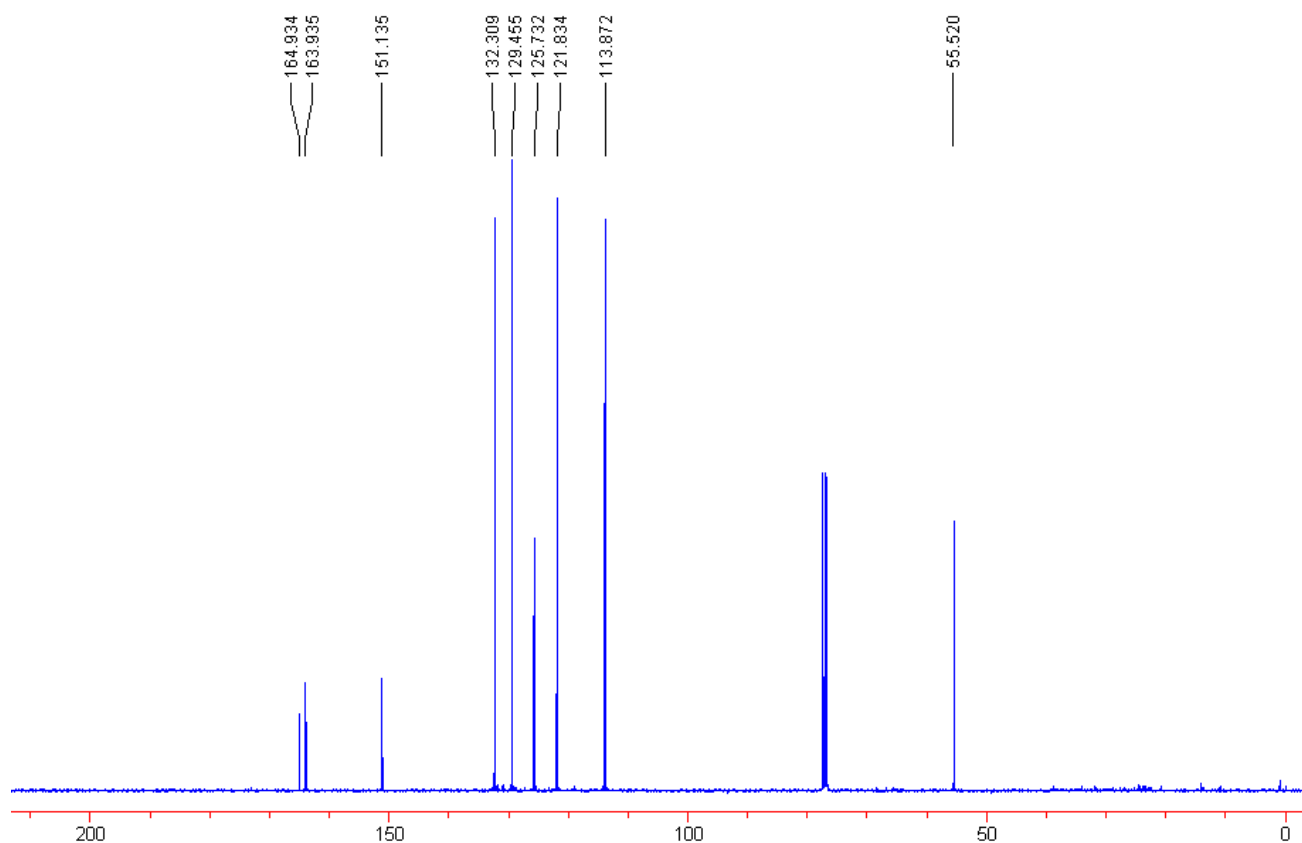

**4-methoxyphenyl 4-methoxybenzoate (6j).**

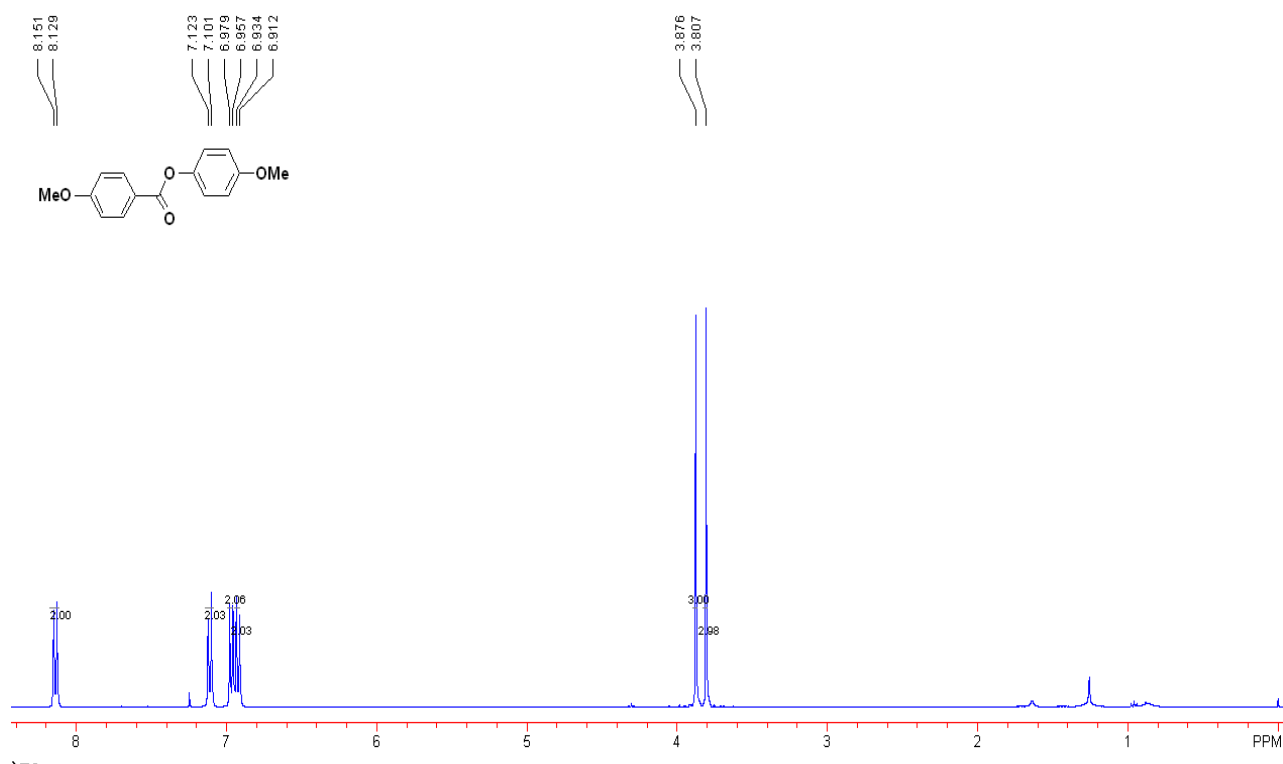

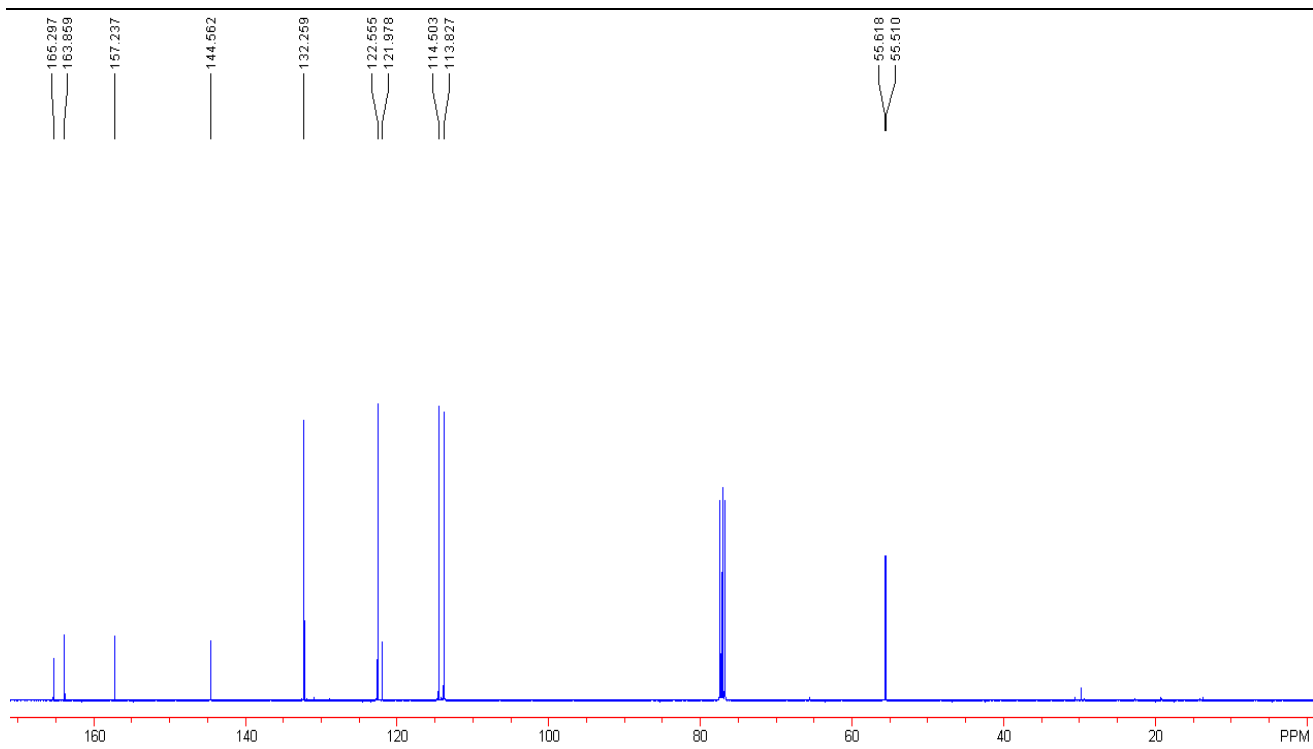

**4-methoxyphenyl 4-nitrobenzoate (6k).**

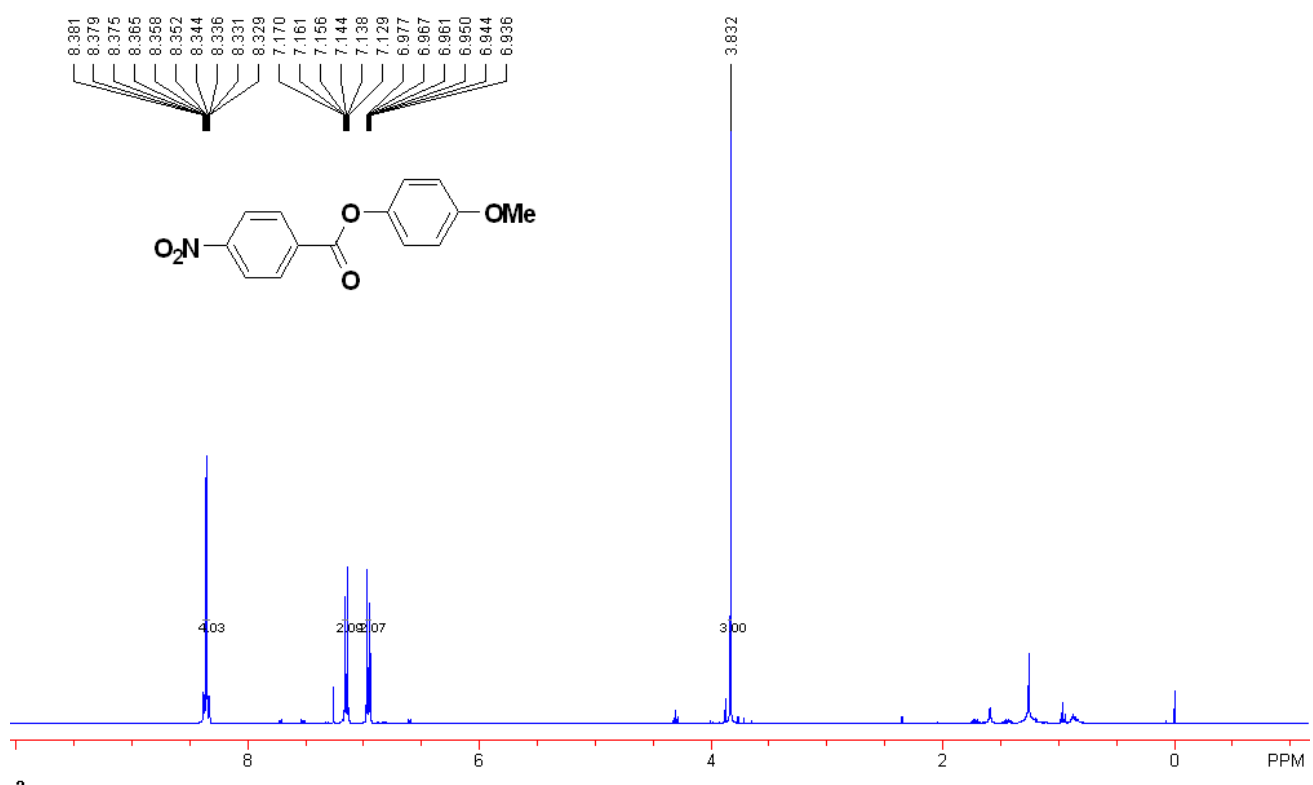



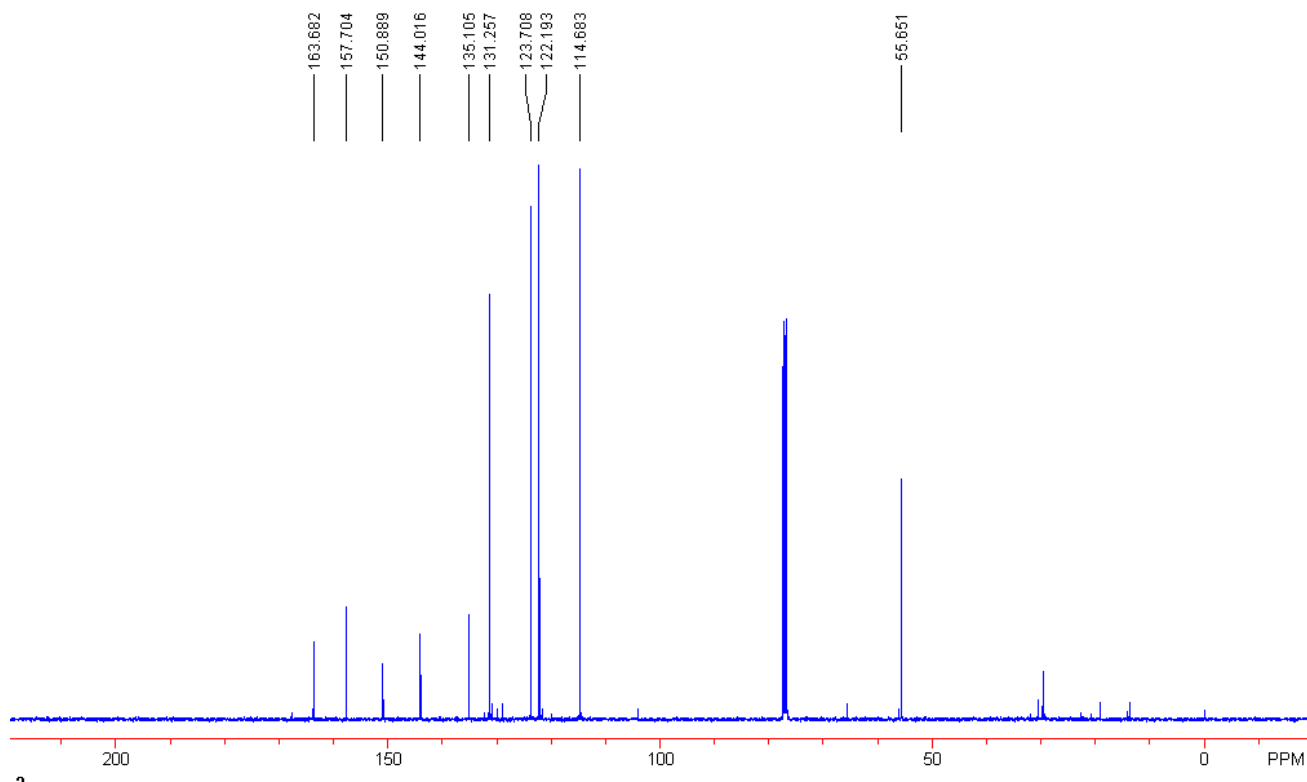

**phenyl 1-naphthoate (6l).**

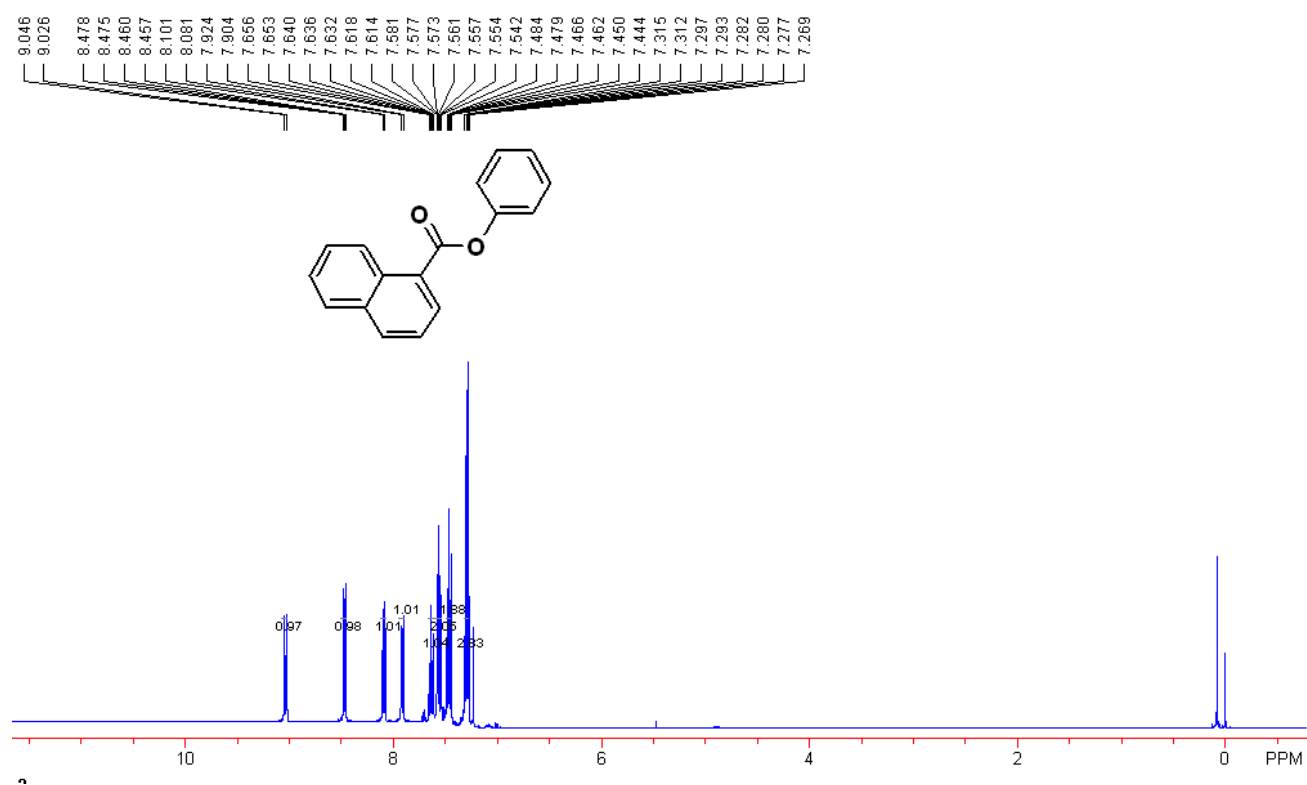

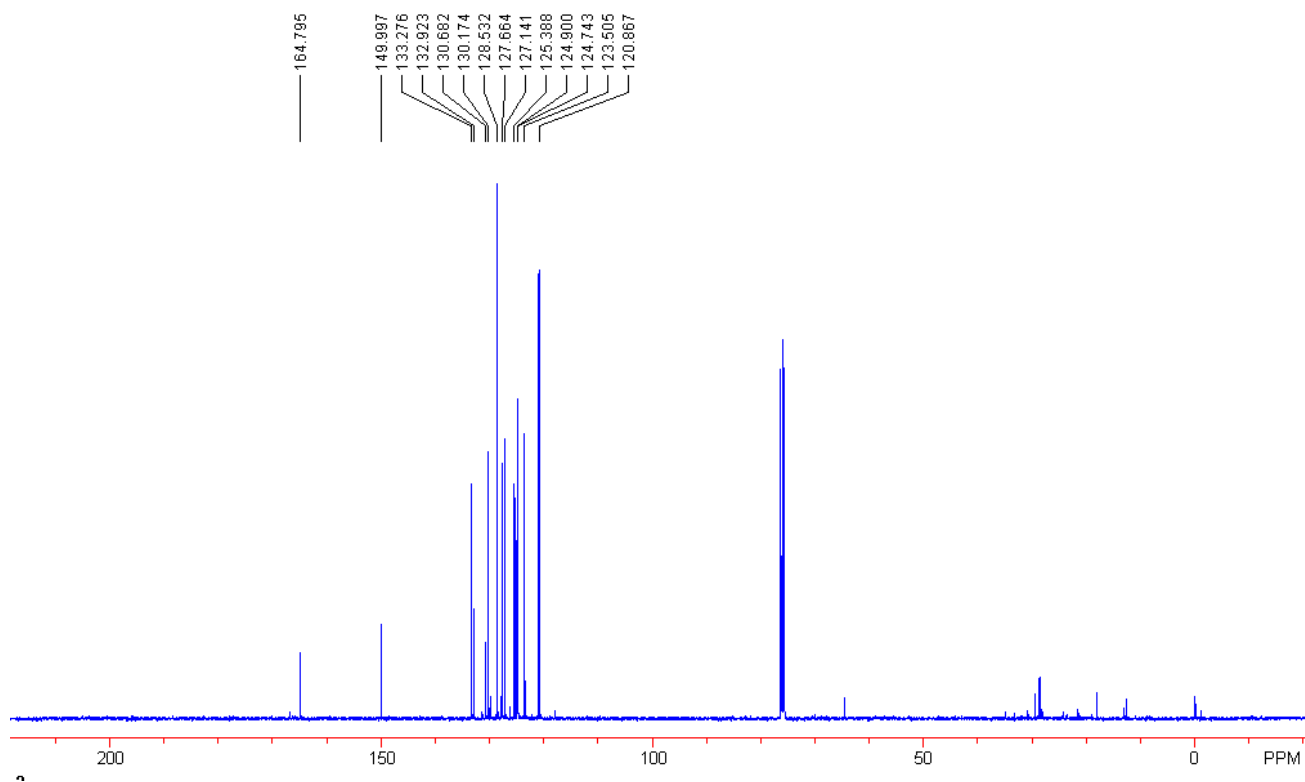

**phenyl 2-naphthoate (6m).**

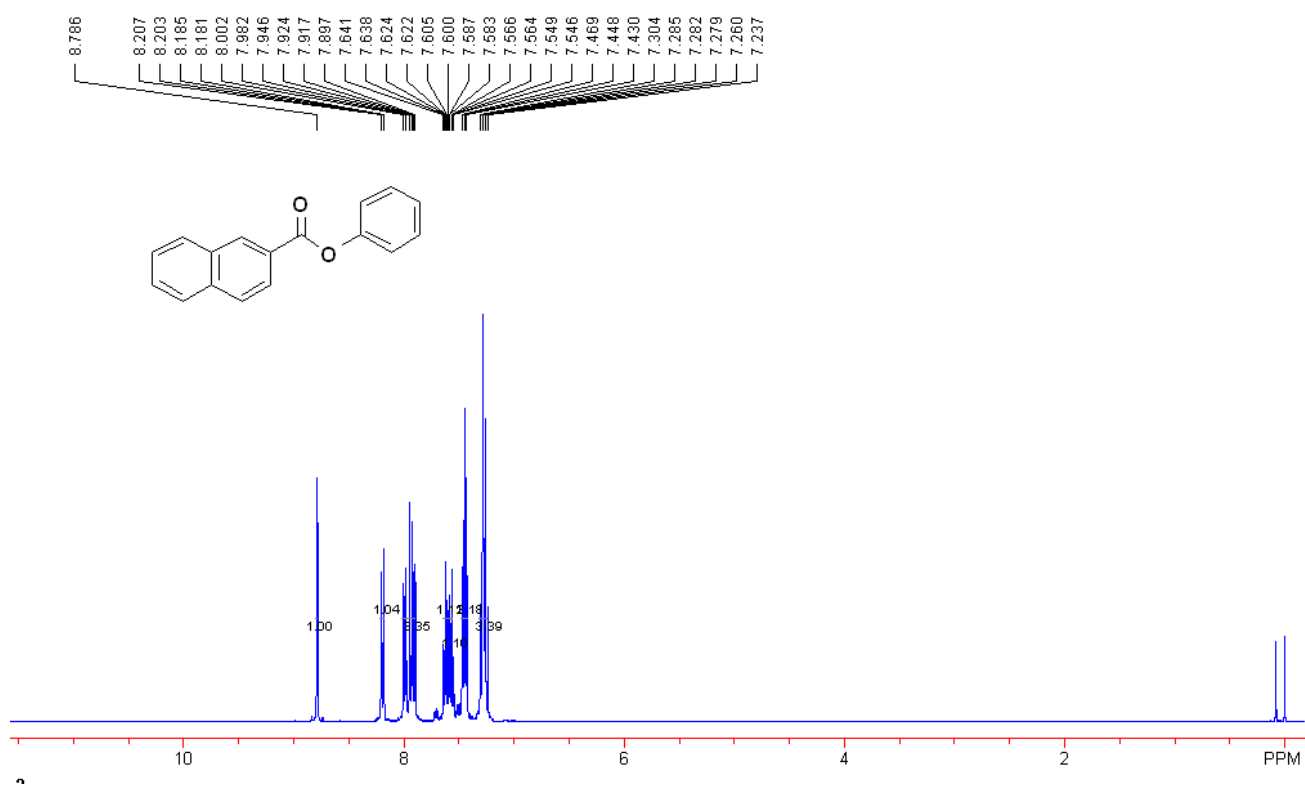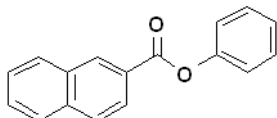

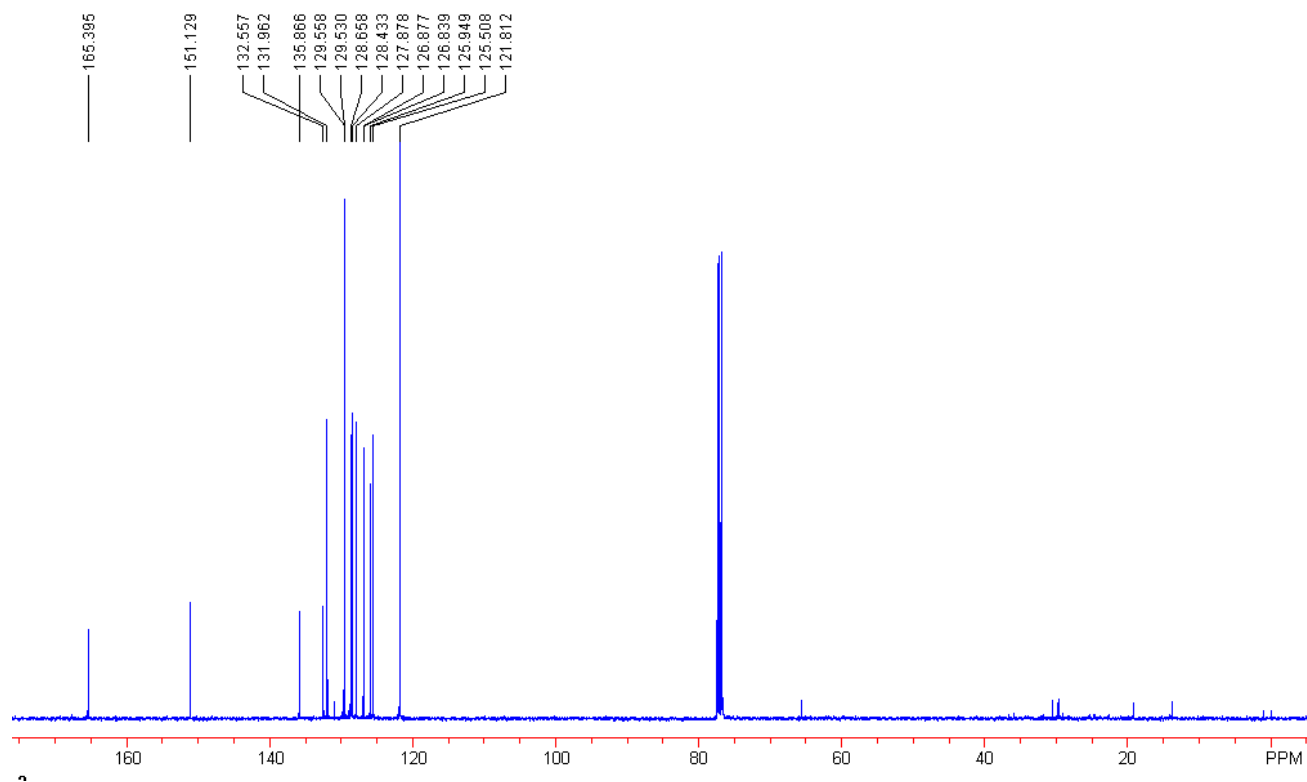

**phenyl cinnamate (6n).**

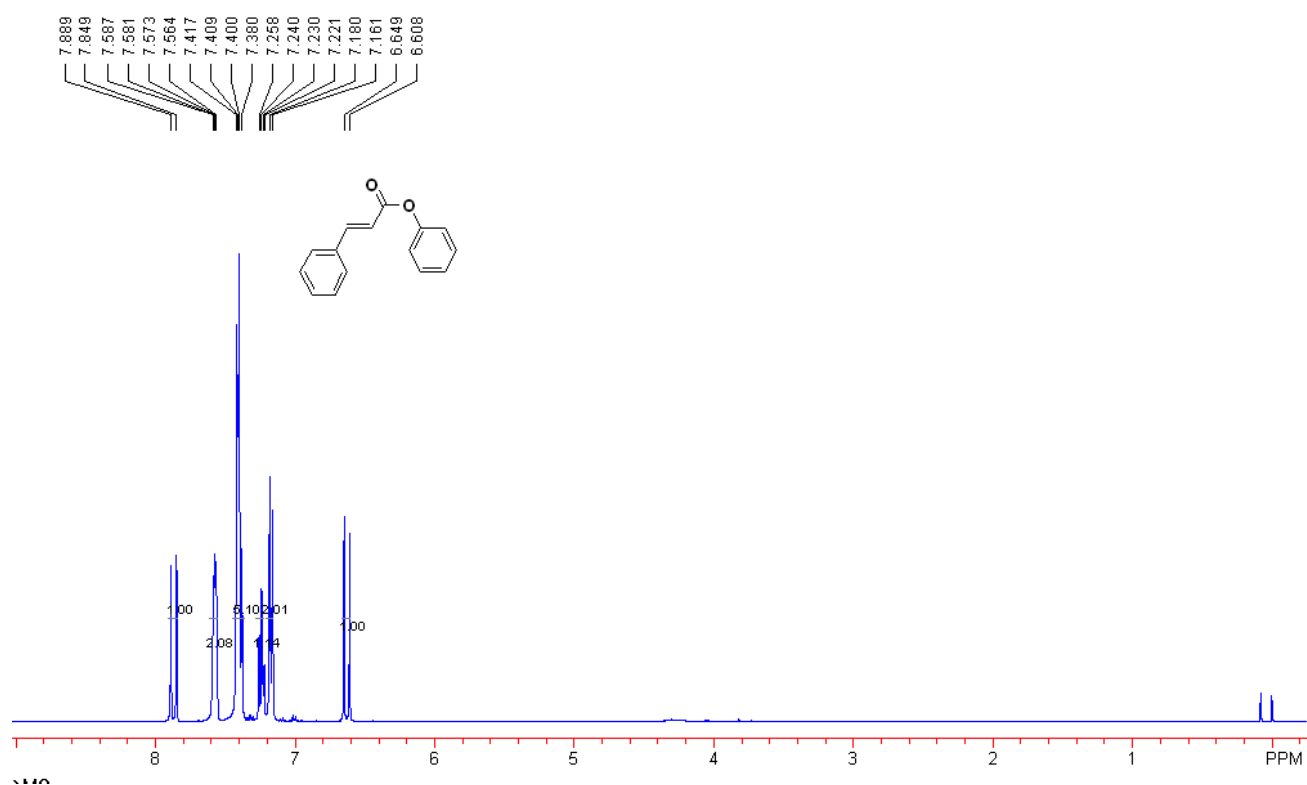

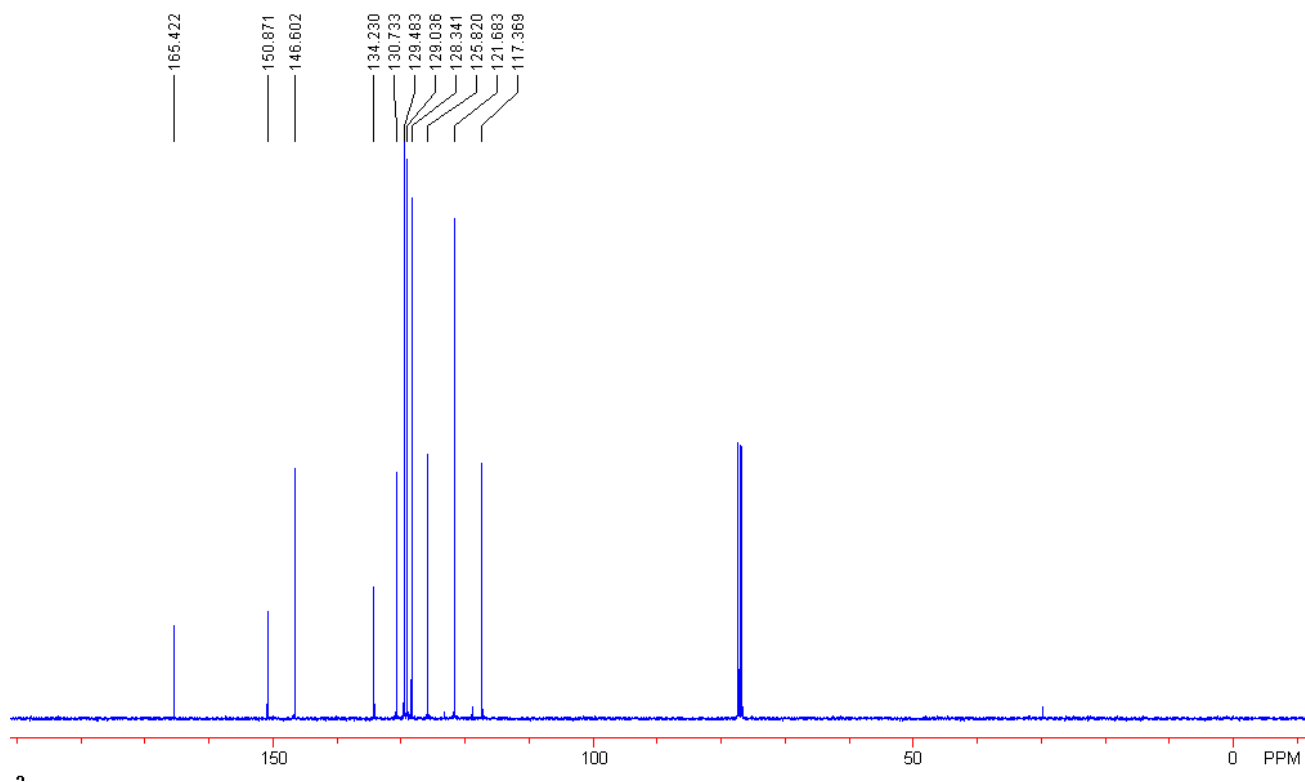

***p*-tolyl cinnamate (60).**

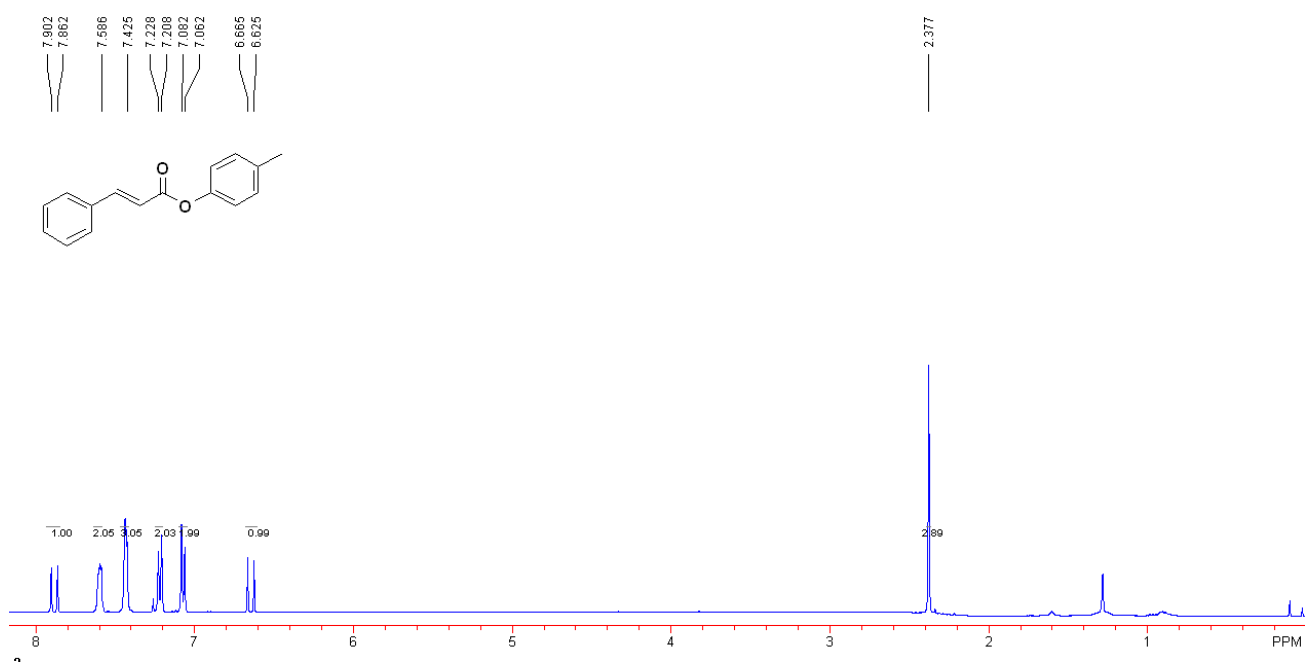

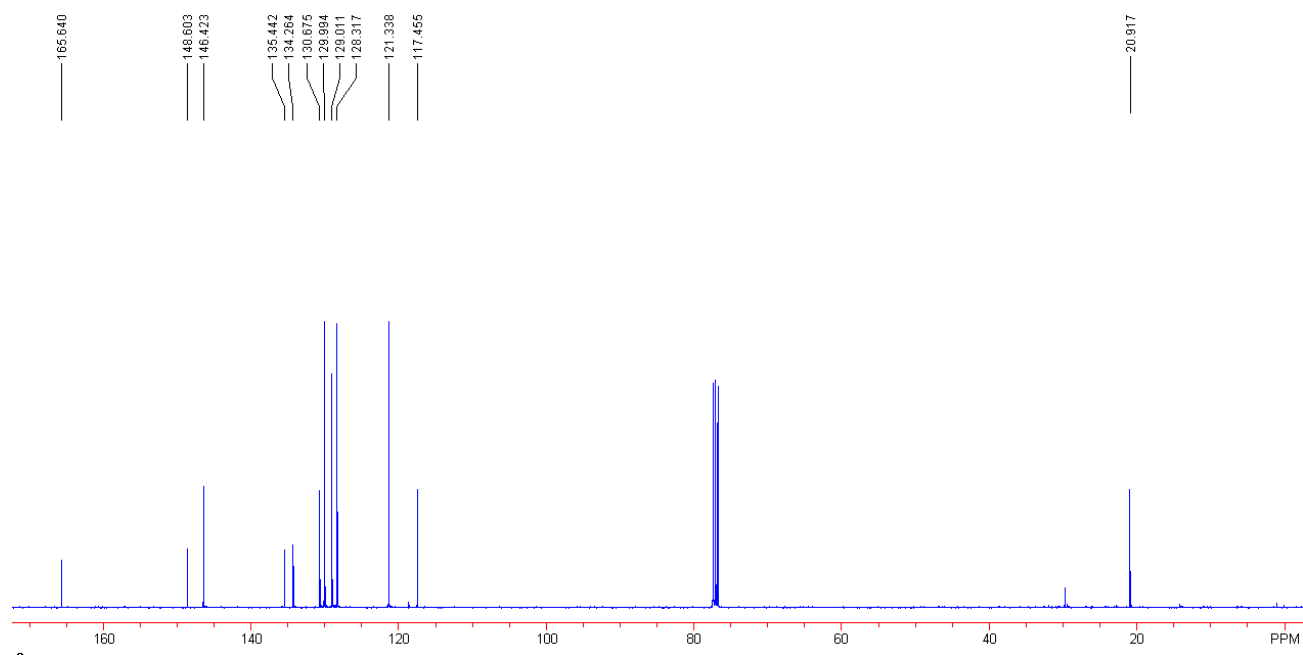

**phenyl 3-methylbenzofuran-2-carboxylate (6p).**

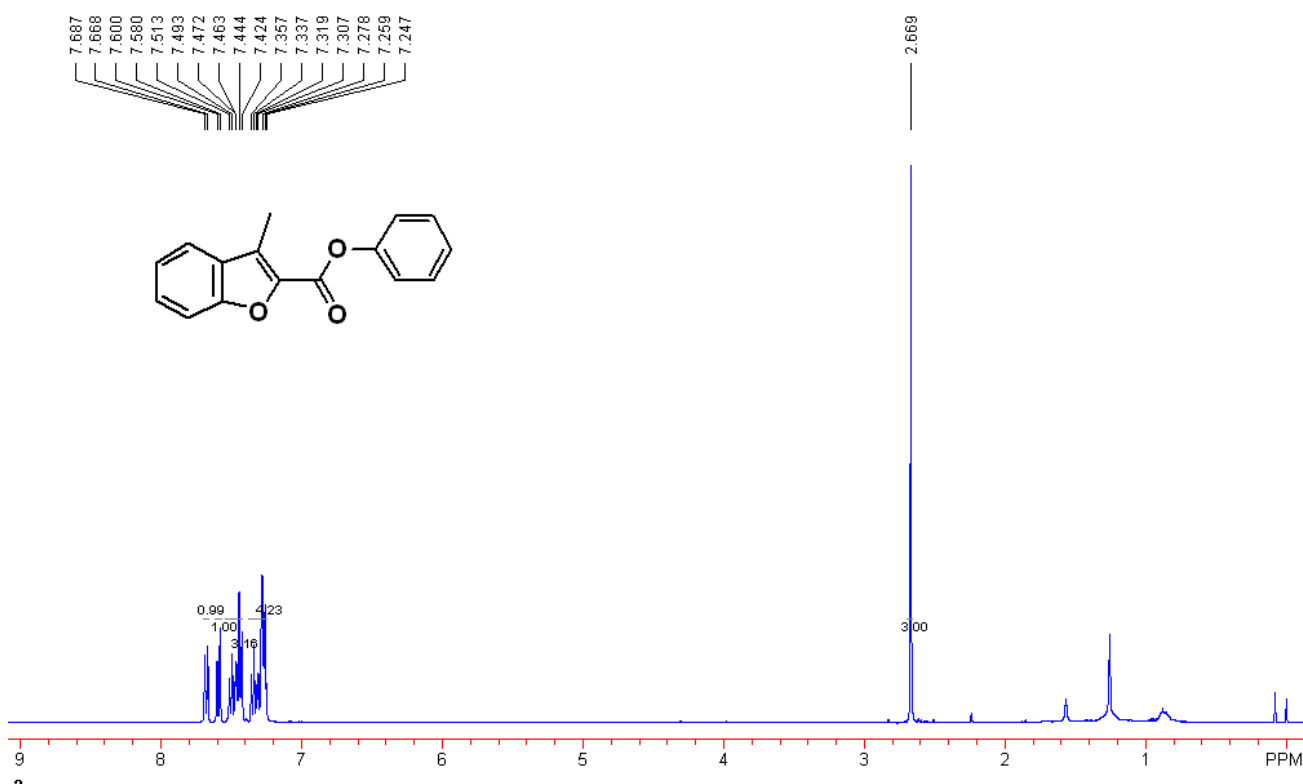

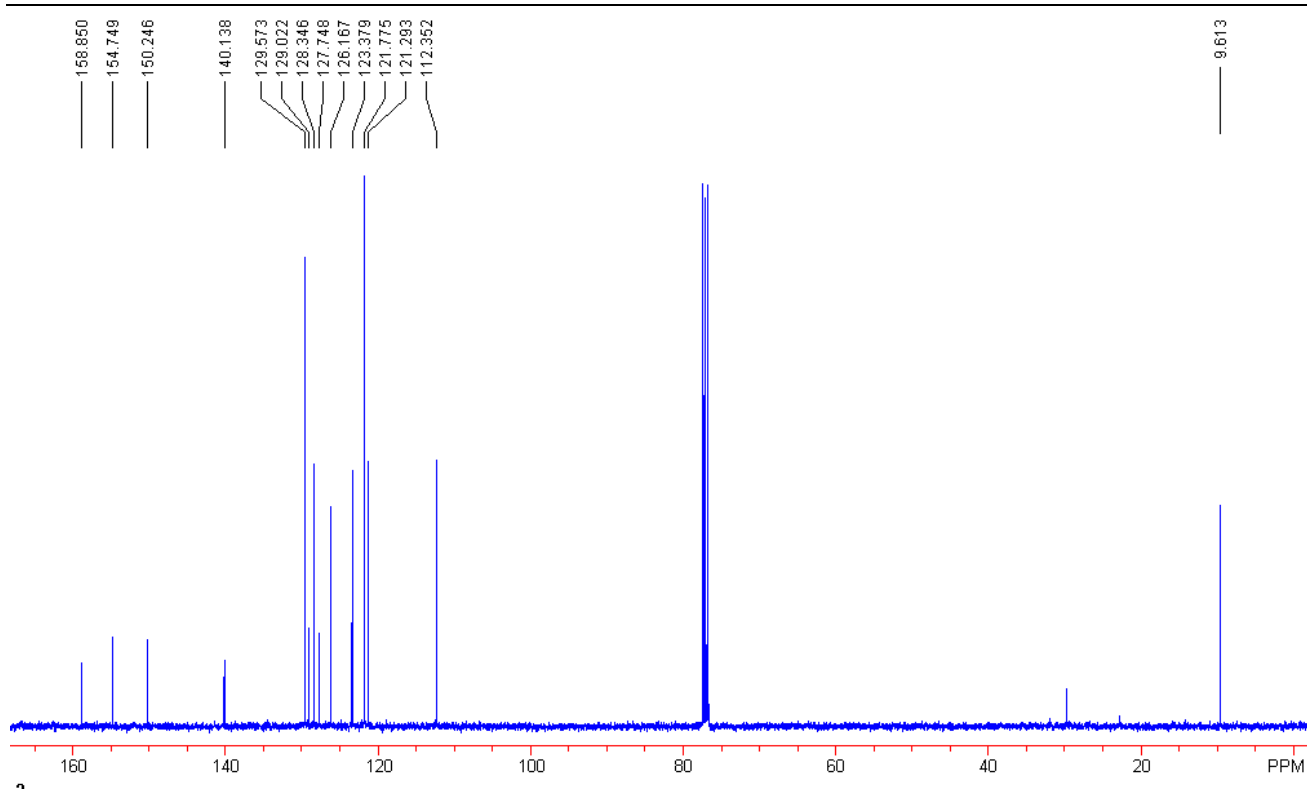

**phenyl 1-methyl-1H-pyrrole-2-carboxylate (6q).**

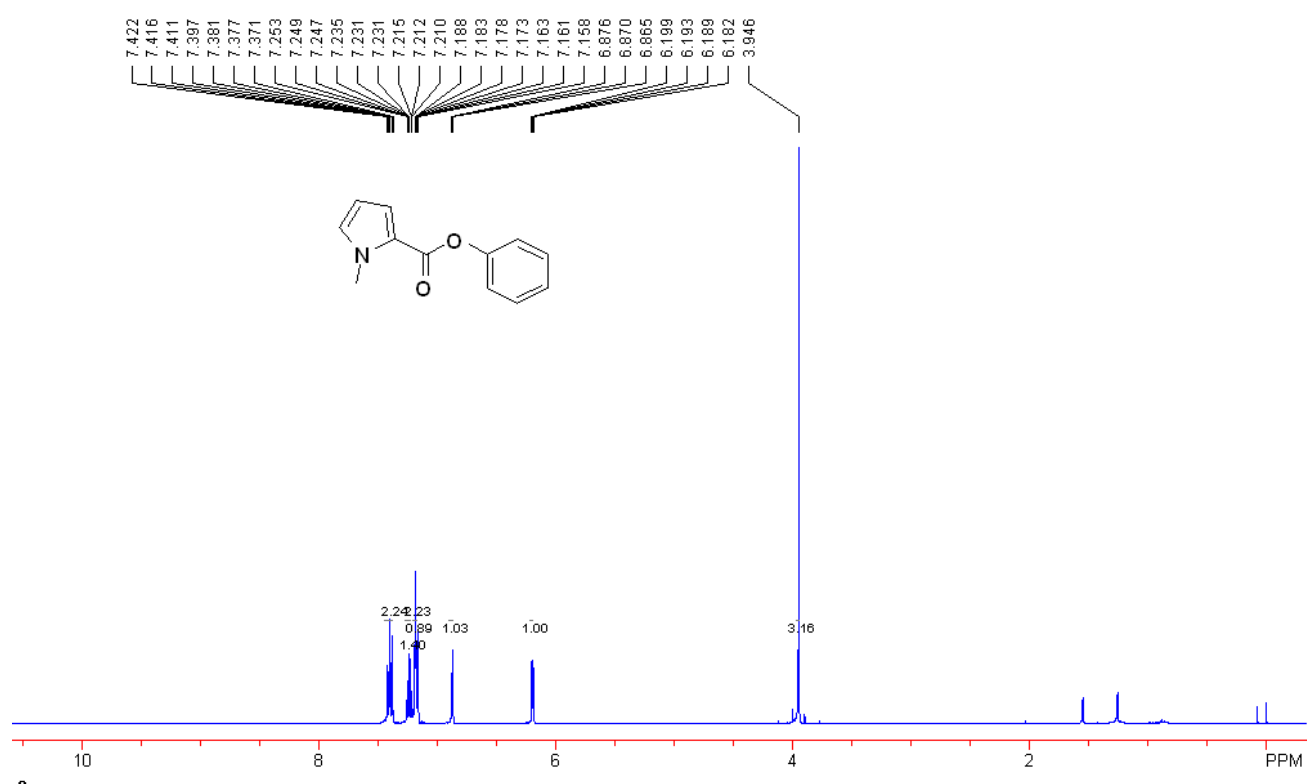

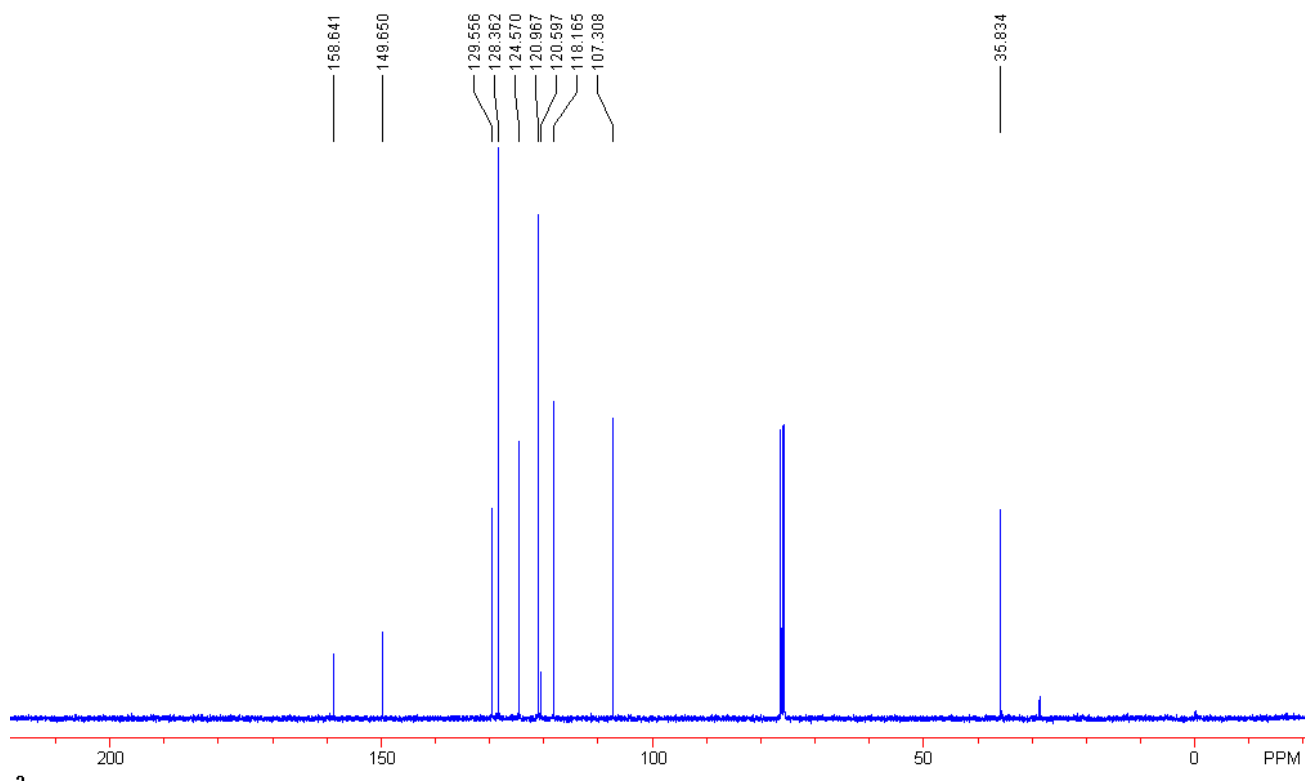

**phenyl 1-phenyl-1H-indole-2-carboxylate (6r).**

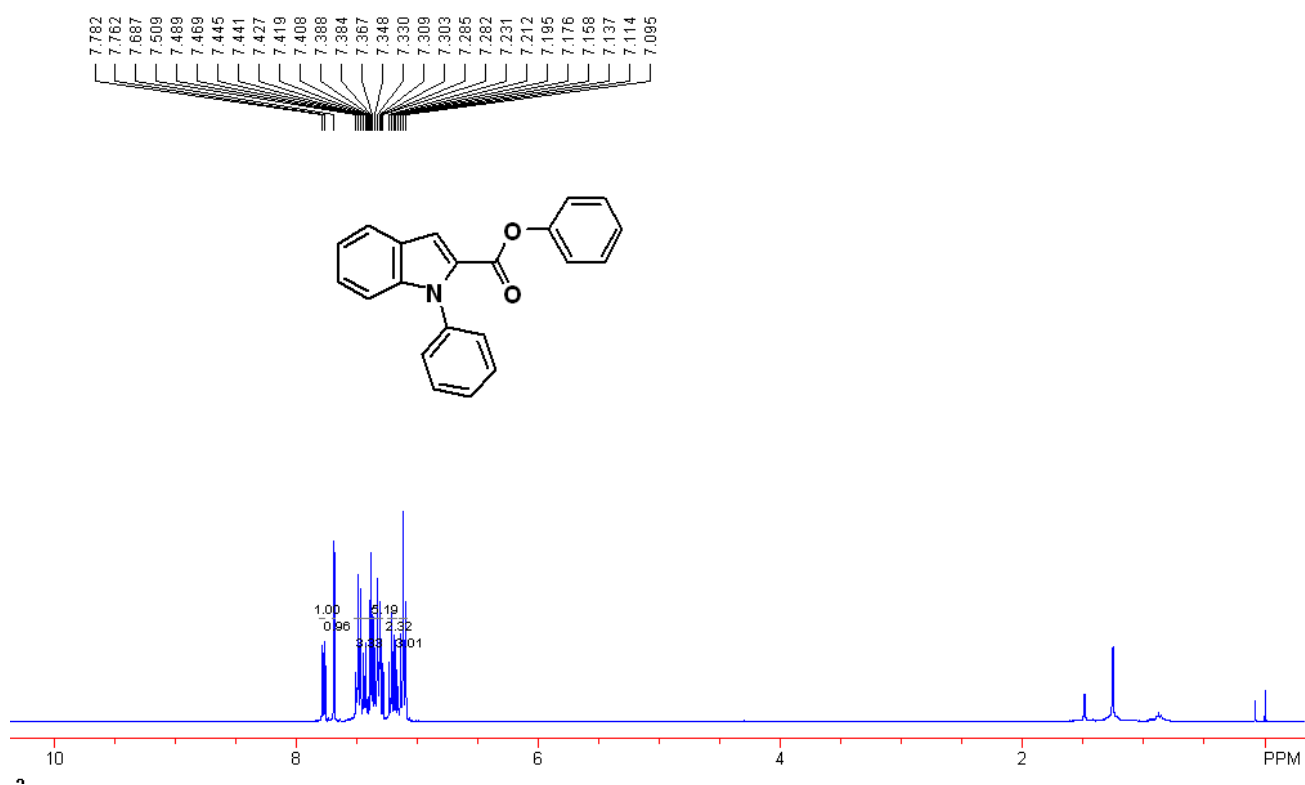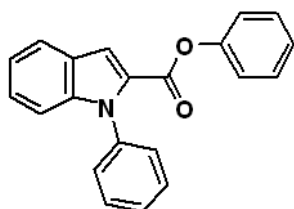

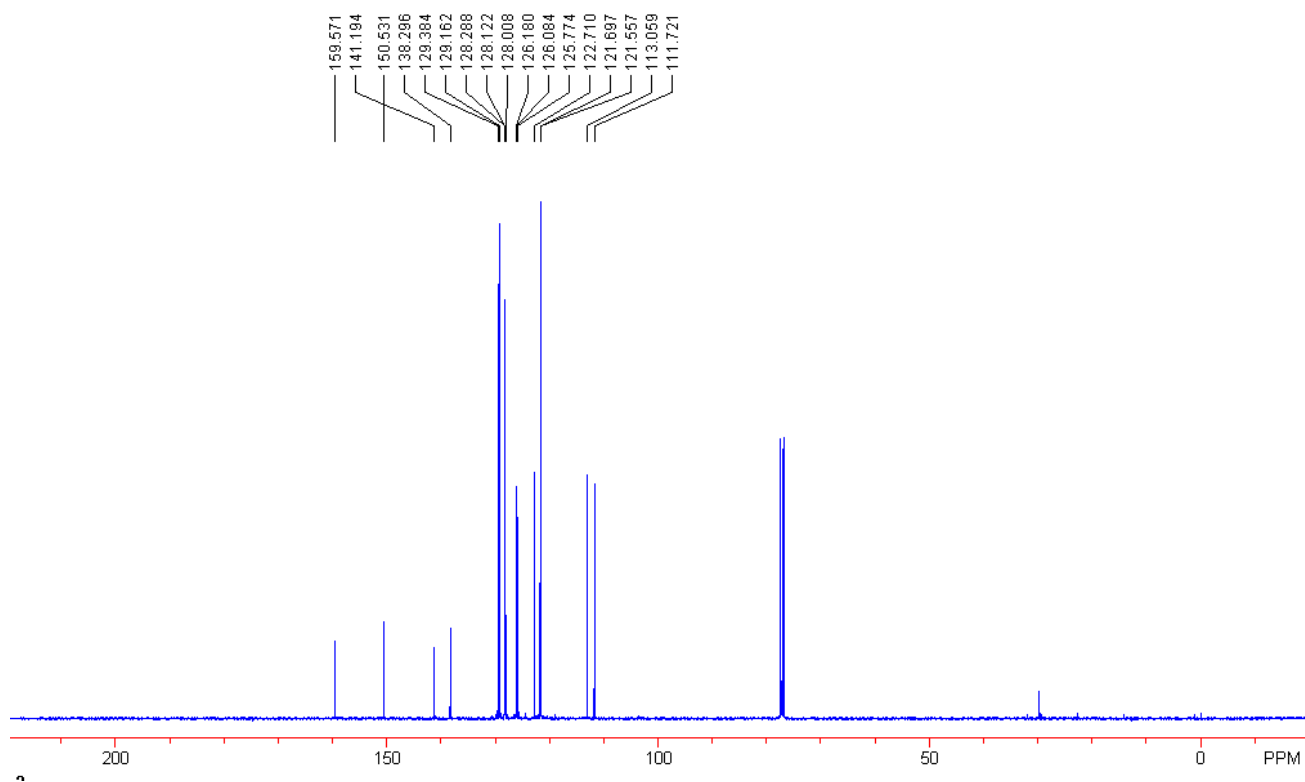

**(E)-styryl 2,6-dimethoxybenzoate (6s).**

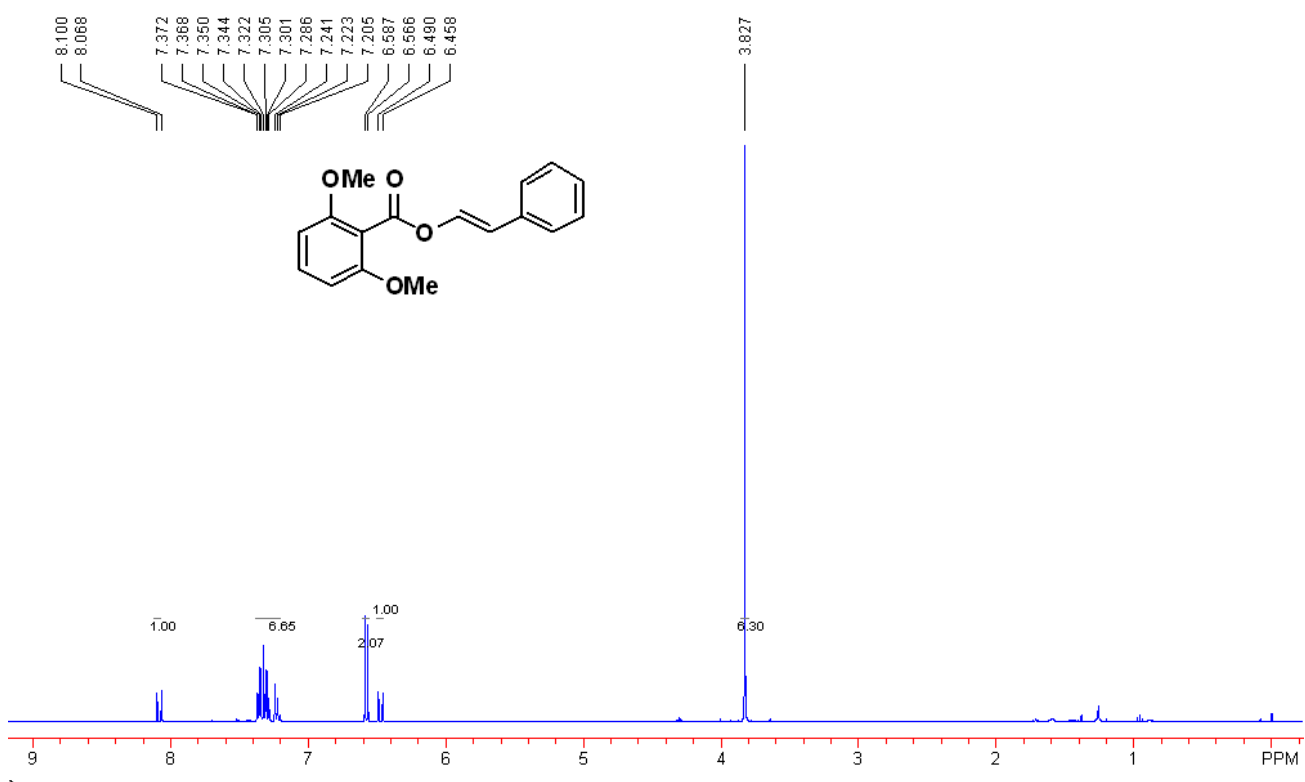



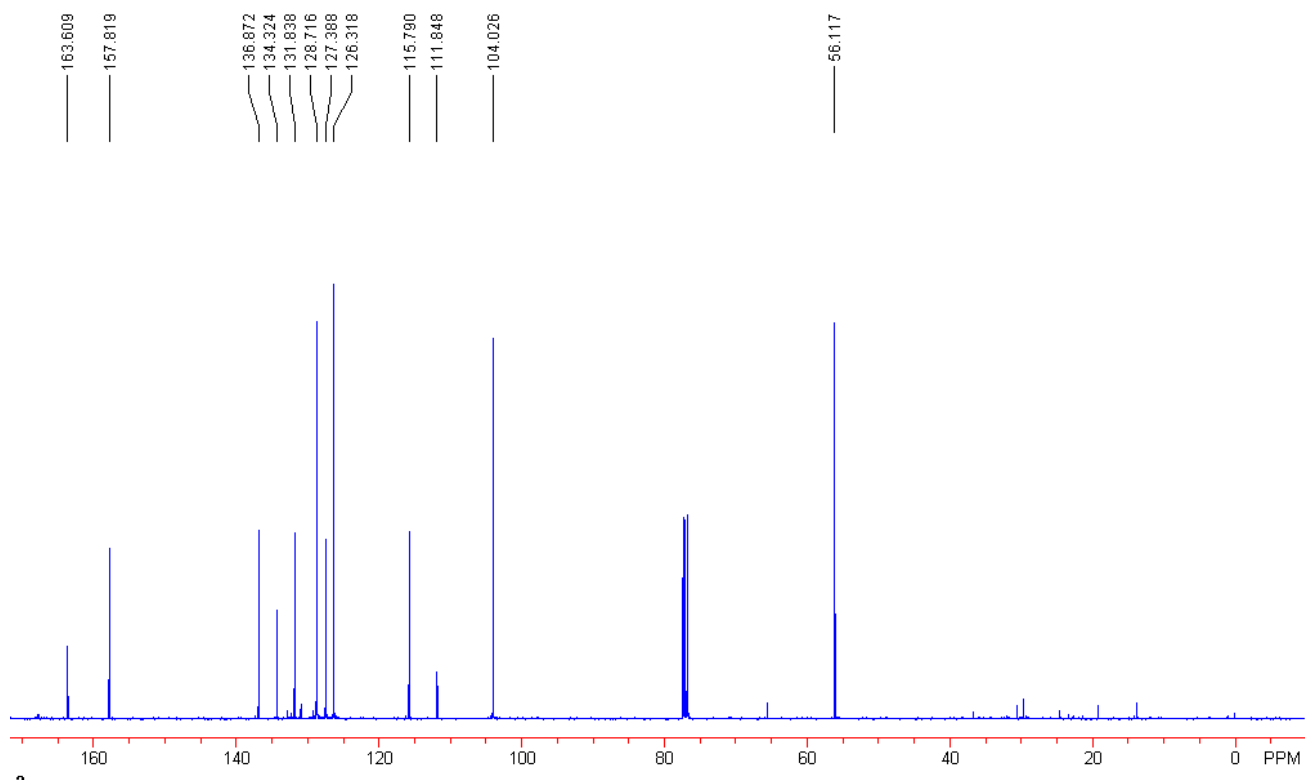

**(E)-styryl 2,6-dichlorobenzoate (6t).**

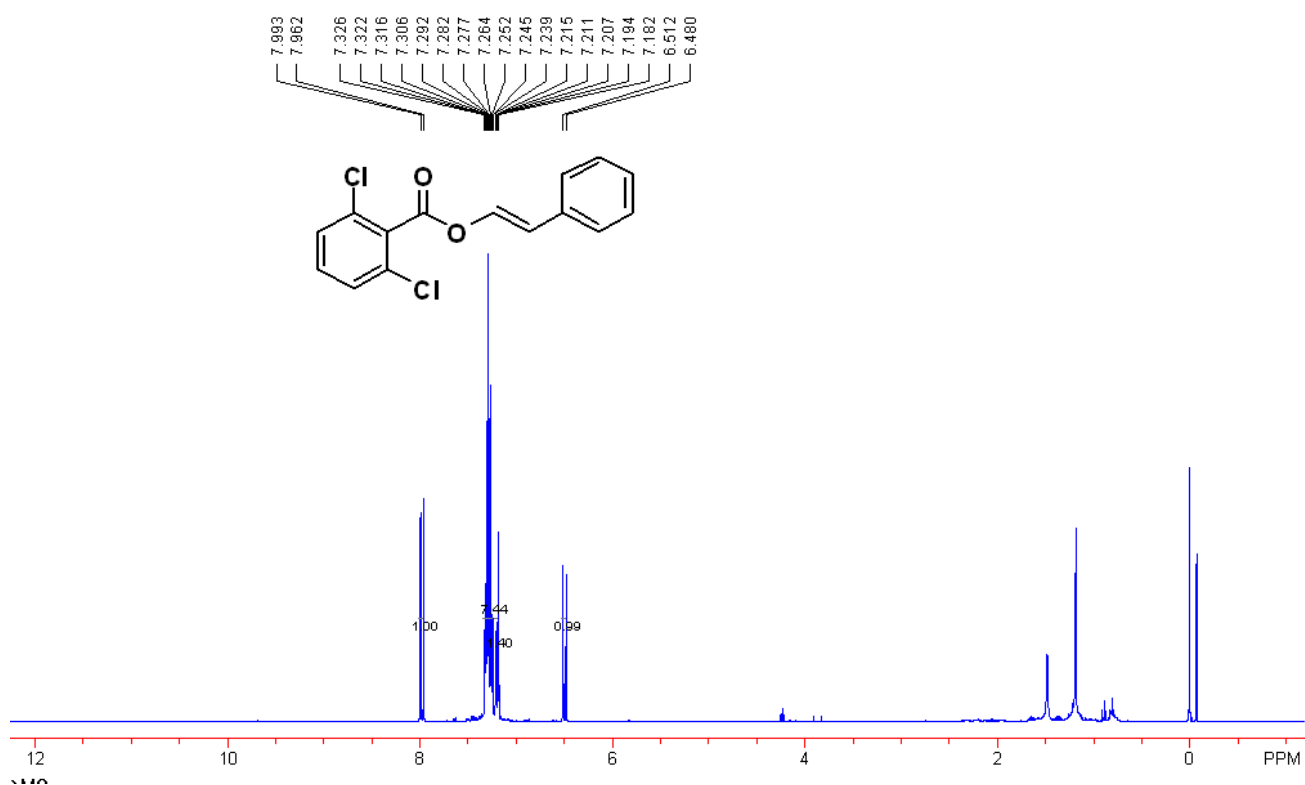

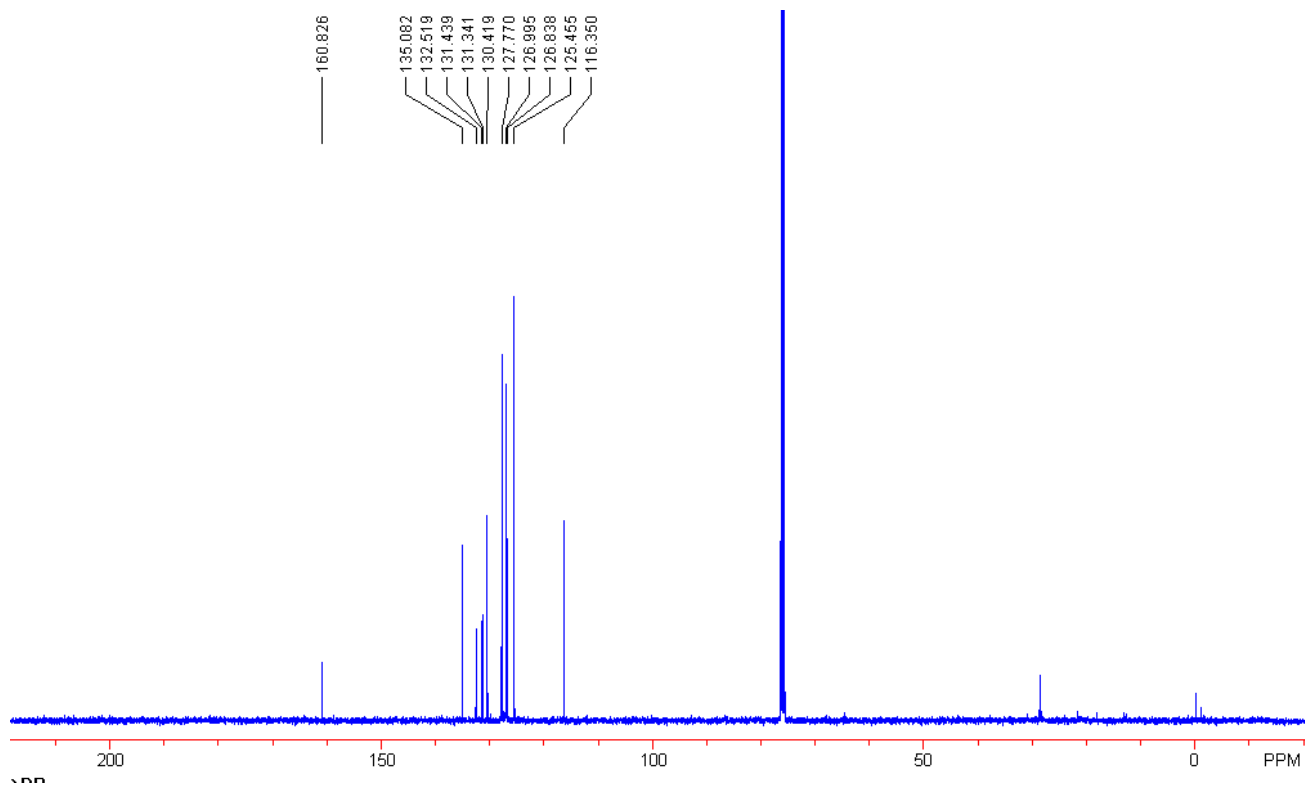

**(E)-styryl 4-methoxybenzoate (6u).**

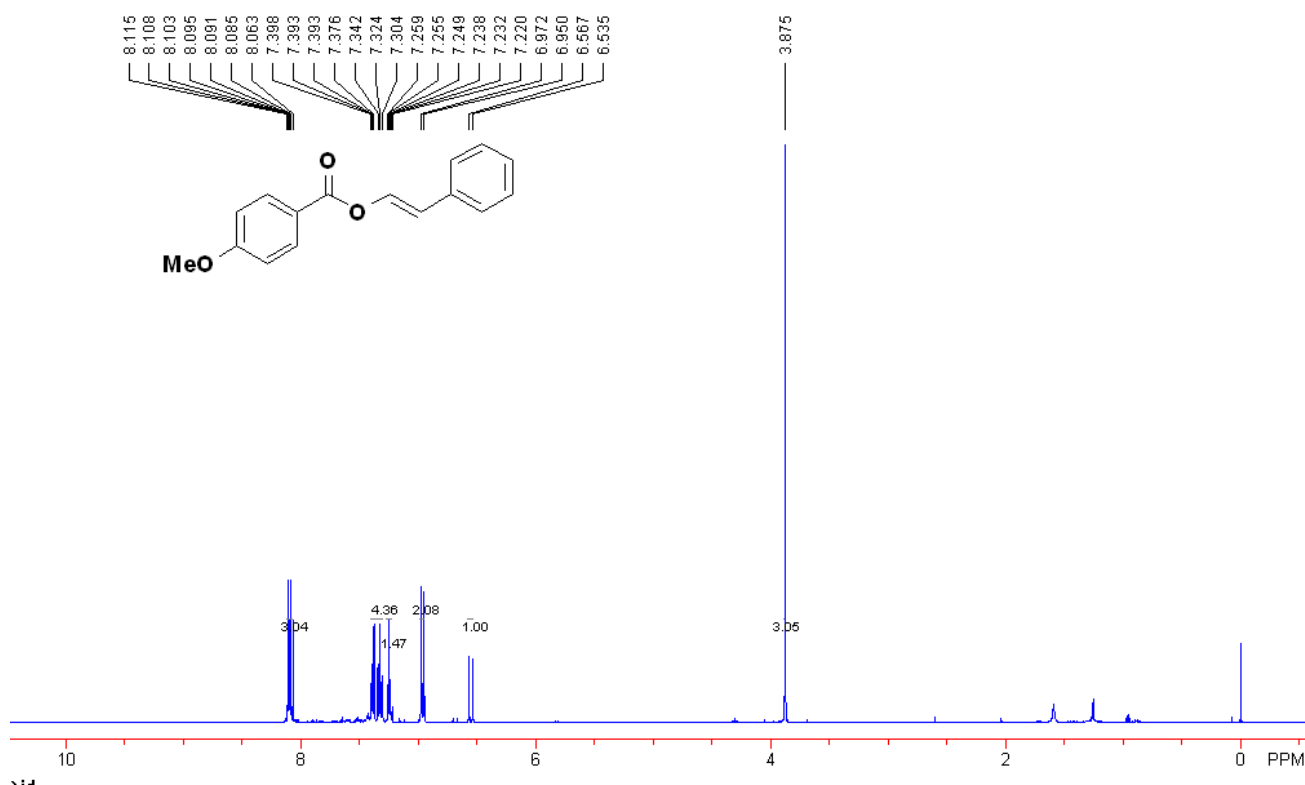

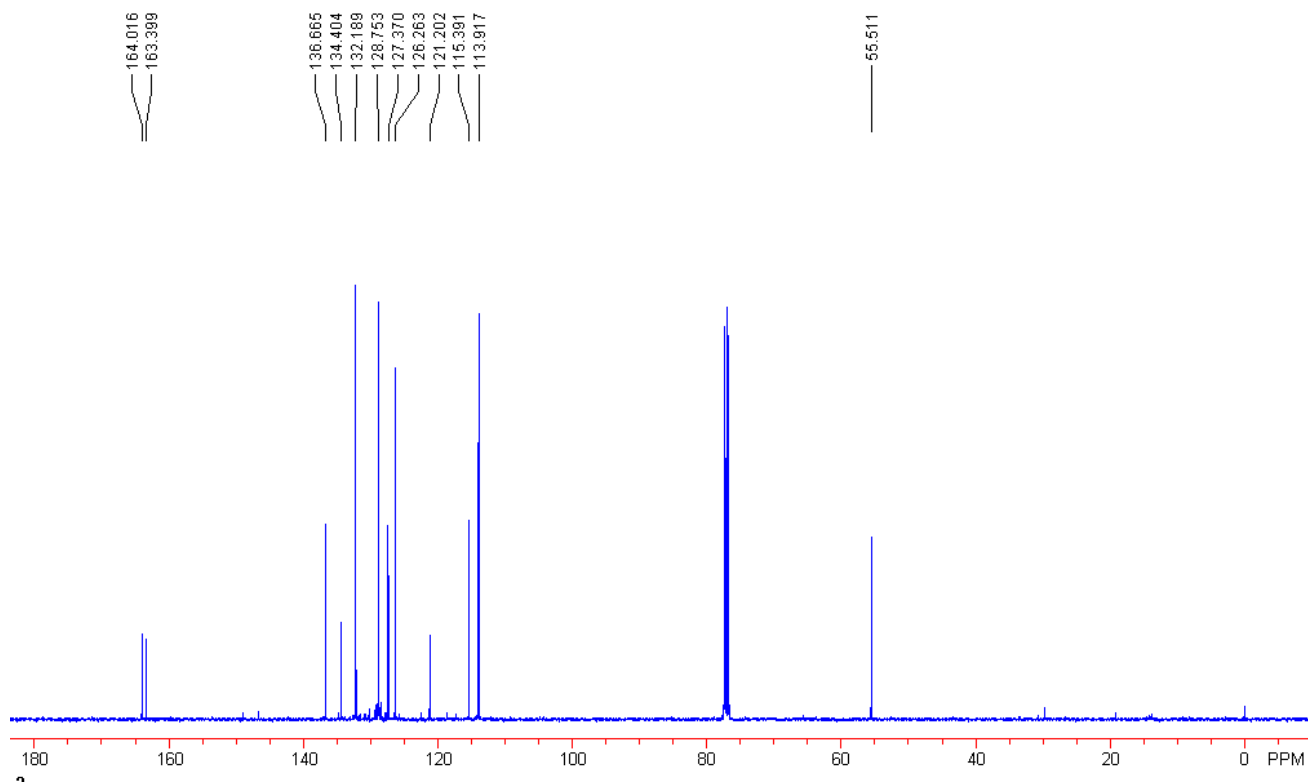

Supplement: c0cc04104a.pdf [file c0cc04104a.pdf]
